# Supplementary material for: Chiral oxalamide phosphine (COAP)-Pd-catalyzed enantioselective cascade formal [4 + 1] annulation for enantioenriched 2,3-disubstituted indolines and further DFT study on regio- and stereocontrol
Source: Royal Society of Chemistry journal article supplement (doi:10.1039/d3qo00011g), 2023-01-01
Supplement: d3qo00011g1.pdf [file d3qo00011g1.pdf]

*Supporting Information*

**Chiral Oxalamide Phosphine (COAP)-Pd-Catalyzed Enantioselective Cascade  
Formal [4+1] Annulation for Enantioenriched 2,3-Disubstituted Indolines and  
Further DFT Study on Regio- and Stereocontrol**

Sheng-Suo Zhou,<sup>a</sup> Jun-Hao Shen,<sup>a</sup> Wen-Kai Liu,<sup>a</sup> Xing-Yun Sun,<sup>a</sup> Jia-Yu Song,<sup>a</sup>  
Zheng Wang,<sup>\*c</sup> Zheng-Hang Qi<sup>\*b</sup> and Xing-Wang Wang<sup>\*a</sup>

<sup>a</sup>Key Laboratory of Organic Synthesis of Jiangsu Province, College of Chemistry, Chemical Engineering and Materials Science, Soochow University, Suzhou 215123, P. R. China.

E-mail: wangxw@suda.edu.cn

<sup>b</sup>National Synchrotron Radiation Laboratory, University of Science and Technology of China, Hefei 230029, People's Republic of China

E-mail: qizhenghang@163.com

<sup>c</sup>State Key Laboratory of Organometallic Chemistry, Center for Excellence in Molecular Synthesis, Shanghai Institute of Organic Chemistry, Chinese Academy of Sciences, Shanghai 200032, P. R. China

E-mail: wzsioc@sioc.ac.cn

**Contents**

|                                                                                  |     |
|----------------------------------------------------------------------------------|-----|
| 1. General methods and materials .....                                           | 1   |
| 2. Preparation of <b>L11–L13</b> .....                                           | 2   |
| 3. Preparation of vinyl benzoxazinaone and <i>N</i> -tosylhydrazone sodium ..... | 6   |
| 4. Optimization of reaction conditions.....                                      | 7   |
| 5. General procedure for the preparation of <b>3</b> .....                       | 11  |
| 6. Scale-up synthesis and further transformations .....                          | 22  |
| 7. DYKAT Studies .....                                                           | 24  |
| 8. The study of the non-linear effect .....                                      | 25  |
| 9. The X-ray data of <b>3s</b> .....                                             | 26  |
| 10. NMR spectra .....                                                            | 28  |
| 11. HPLC analysis.....                                                           | 61  |
| 12. Computational details .....                                                  | 79  |
| 13. References.....                                                              | 160 |

## 1. General methods and materials

Unless otherwise stated, all reagents were purchased from commercial suppliers and used without further purification unless otherwise noted. Some commonly used solvents for asymmetric catalysis were dried with different drying agents through standard methods reported, including of methylene chloride (DCM), dichloroethane (DCE), tetrahydrofuran (THF), toluene, acetonitrile, trichloromethane, carbon tetrachloride, methyl tert-butyl ether (MTBE) as well as acetone. All other reaction media were used as obtained unless otherwise noted. Some reactions for the ligand synthesis were carried out in air and using undistilled solvents, without any precautions to exclude moisture unless otherwise noted. Flash Chromatography was performed with silica gel (300–400 mesh) from Yantai Chemical Industry Research Institute, P. R. China. Analytical thin-layer chromatography (TLC) was performed with  $0.2 \pm 0.03$  mm coated commercial silica gel plates (GF-254, particle size 0.04–0.05 mm). The  $^1\text{H}$  and  $^{13}\text{C}$  NMR spectra were recorded in  $\text{CDCl}_3$  on Varian Inova (400 MHz and 100 MHz, respectively) spectrometer. Chemical shifts ( $\delta$  ppm) are relative to the resonance of the deuterated solvent as the internal standard ( $\text{CDCl}_3$ ,  $\delta$  7.26 ppm for proton NMR,  $\delta$  77.10 ppm for carbon NMR). The  $^1\text{H}$  NMR data were reported as follows: chemical shift ( $\delta$ , ppm), multiplicity (s = singlet, d = doublet, q = quartet, m = multiplet, td = triplet of doublets, dt = doublet of triplets, dd = doublet of doublets), coupling constants ( $J$ ) and assignment. The data for  $^{13}\text{C}$  NMR are reported in terms of chemical shift ( $\delta$ , ppm). The IR spectra were recorded on a Varian 1000 FT-IR spectrometer. High-resolution mass spectra (HRMS) for all the compounds were determined on Micromass GCT-TOF mass spectrometer with ESI resource. High performance liquid chromatography (HPLC) was performed on an Agilent 1200 Series chromatographs using Chiralpak AD-H, AS-H column. The X-ray data were recorded on a Rigaku Mercury CCD/AFC diffractometer. Optical rotations were performed on Rudolph Aupol IV and reported as follows:  $[\alpha]_{\text{D}}^{25}$  (c in g per 100 mL, solvent).

## 2. Preparation of L11–L13

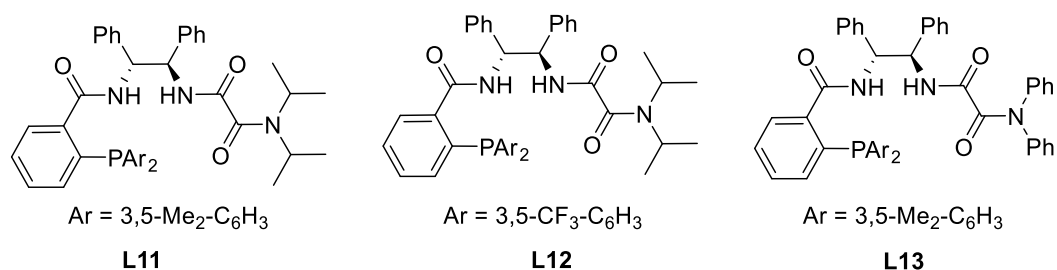

**Figure S1.** The structure of modified chiral oxalamide-phosphine (COAP) ligands **L11–L13**

### 2.1 Preparation of L11–L13

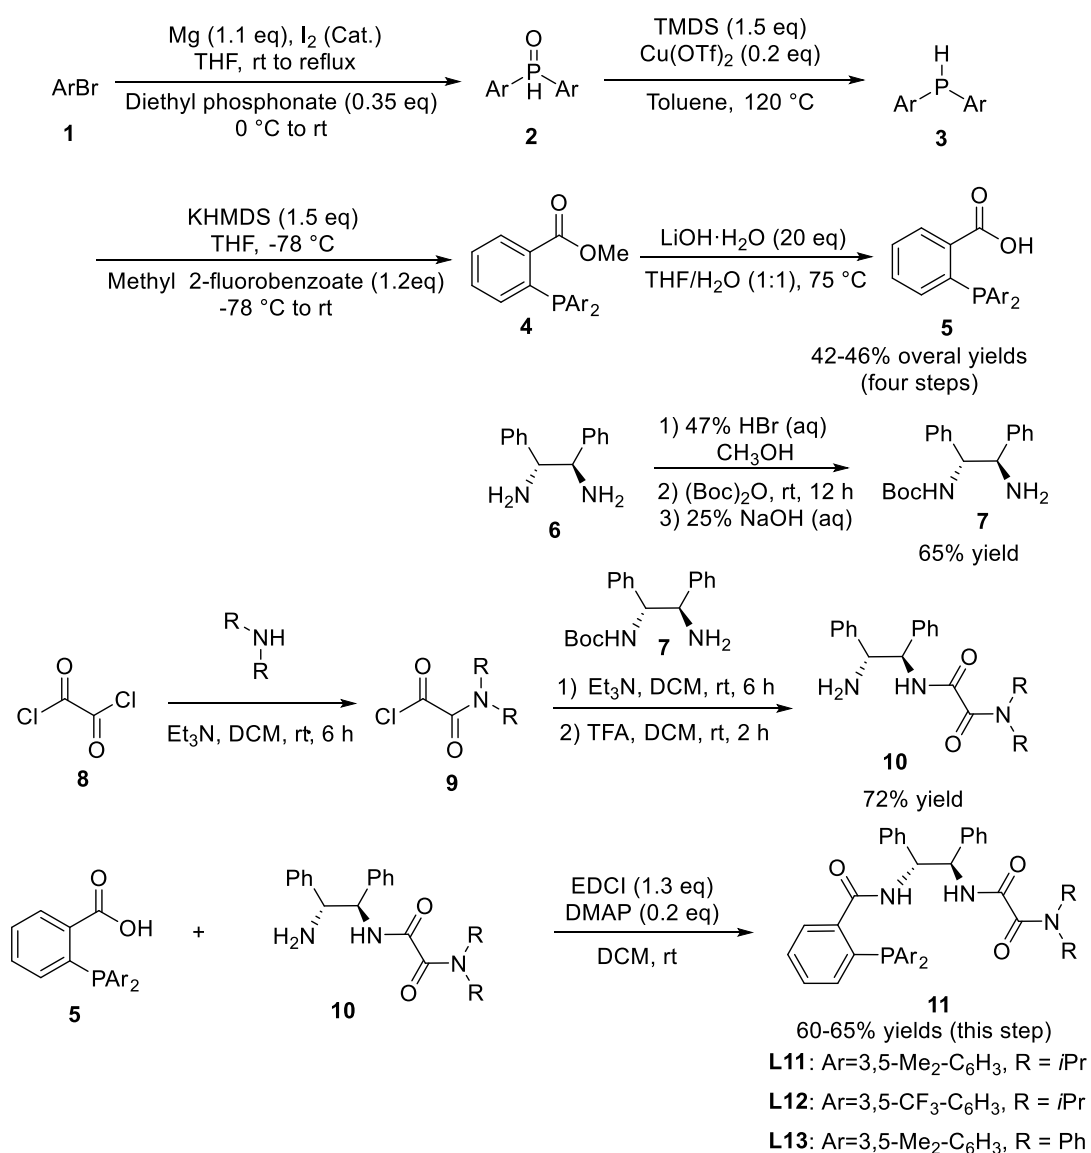

**Figure S2.** Synthetic scheme of the modified COAP

General procedures: The modified chiral oxalamide-phosphine (COAP) ligands **L11–L13** were synthesized according to literature methods with modification.<sup>1-5</sup>

Diethylphosphonate (1.35 mL, 10.5 mmol) was added dropwise at 0 °C to a solution of arylmagnesium bromide in THF (40 mL) which was prepared intermediately from aryl bromides **1** (30.0 mmol) and magnesium (0.79 g, 33.0 mmol). The mixture was stirred for 2 hours at room temperature. Upon completion (monitored by TLC), the mixture was quenched by a saturated aq. NH<sub>4</sub>Cl (30 mL), extracted with EtOAc (3×30 mL), and dried over Na<sub>2</sub>SO<sub>4</sub>. The organic phase was concentrated in vacuum and the residue was purified by column chromatography on silica gel using petroleum ether/ethyl acetate= 20/1 as eluent to give the diarylphosphine oxides **2**.

The corresponding diarylphosphine oxides **2** (2.56 g, 10.0 mmol) and Cu(OTf)<sub>2</sub> (0.72 g, 2.0 mmol, 0.2 equiv.) were added in a 50 mL Schlenk tube at room temperature. Then TMDS (2.65 mL, 15 mmol, 1.5 equiv.) and toluene (20 mL) were added under nitrogen protection. The reaction mixture was stirred for 12 h at 120 °C. After the reaction was completed, the solvent was removed under vacuum. The residue diarylphosphane **3** was used intermediately for the next step without any purification.

The corresponding diarylphosphanes **3** were placed in a Schlenk flask and dissolved in anhydrous THF (20 mL). The reaction mixture was cooled to –78 °C, KHMDS (1.0 M in THF, 15mL, 15 mmol, 1.5 equiv.) was added via syringe. The reaction mixture was then warmed to room temperature and stirred for 1 hour. The reaction mixture was cooled to –78 °C again and methyl-2-fluorobenzoate (1.5 mL, 12 mmol, 1.2 equiv.) was added dropwise. After the addition, the reaction mixture was warmed to room temperature and stirred overnight. The mixture was quenched with NH<sub>4</sub>Cl aqueous (20mL) and was extracted with EtOAc (3×30mL). The combined organic layers were dried over Na<sub>2</sub>SO<sub>4</sub>, filtered and evaporated in vacuo. The crude was purified by flash chromatography on silica gel using petroleum ether/ethyl acetate = 20:1 as eluent to provide the products **4**.

The corresponding compounds **4** were charged into a round bottom flask equipped with reflux condenser and dissolved in THF (20 mL) at room temperature. Water (20 mL) was added into this solution followed by LiOH H<sub>2</sub>O (7.80 g, 186 mmol, 20 equiv.). The reaction mixture was stirred at 75 °C for 36 h. Then the mixture was cooled to room temperature and extracted with EtOAc (3×30mL). The combined organic layers were dried over Na<sub>2</sub>SO<sub>4</sub>, filtered and evaporated in vacuo.

The crude was purified by flash chromatography on silica gel using petroleum ether/ethyl acetate = 5:1 as eluent to provide the corresponding products **5** (four steps, 42–46% yields).

To a solution of (*1R,2R*)-1,2-diphenylethane-1,2-diamine **6** (20 g, 94.0 mmol) in MeOH (250 mL) was added 47% HBr (aq., 11 mL, 94 mmol) at room temperature. Then both H<sub>2</sub>O (30 mL) and Boc<sub>2</sub>O (23 g, 104 mmol) were added. After stirring for 12 hours, H<sub>2</sub>O (200 mL) was added to the mixture. The precipitated byproduct (diBoc compound) was filtered off, and the MeOH was removed under reduced pressure. The residue was basified with 25% aq. NaOH until pH values were over 14. The mixture was further cooled to 0 °C. After stirring for 1.0 hour, the precipitate was collected by filtration to afford wet crude product. The crude product was purified by column chromatography on silica gel (petroleum ether/EtOAc/CH<sub>3</sub>OH 3:1:0.1 v/v) to give the corresponding product **7** (65% yield).

Amines of NHRR (10 mmol) in anhydrous CH<sub>2</sub>Cl<sub>2</sub> (10 mL) were respectively added dropwise to a solution of oxalyl chloride **8** (1.29 mL, 15 mmol) in anhydrous CH<sub>2</sub>Cl<sub>2</sub> (20 mL) at 0 °C. After stirring for 5 minutes, dry Et<sub>3</sub>N (1.46 mL, 10.5 mmol) was added dropwise at 0 °C. Then, the mixture was further stirred for 6 hours at room temperature. The excess of oxalyl chloride and the solvent were removed under reduce pressure. The crude products **9** were dissolved in CH<sub>2</sub>Cl<sub>2</sub> (15 mL) and cooled to 0 °C. And then a solution of the compound **7** (2.5 g, 8 mmol) in anhydrous CH<sub>2</sub>Cl<sub>2</sub> (10 mL) was added dropwise at 0 °C, followed by the addition of Et<sub>3</sub>N (1.15 mL, 8.4 mmol). Then the mixture was stirred for 12 hours at room temperature before being quenched by water (20 mL). The organic layer was separated and the aqueous layer was extracted with CH<sub>2</sub>Cl<sub>2</sub> (10 mL×3). The combined organic phase was washed with brine (20 mL), and then dried over anhydrous Na<sub>2</sub>SO<sub>4</sub>. After removing the solvent under reduce pressure, the product was used for next step without further purification.

At room temperature, TFA (5.95 mL, 80 mmol) was added to a solution of the above product in anhydrous CH<sub>2</sub>Cl<sub>2</sub> (100 mL). After stirring for 2 hours, the mixture was poured into saturated NaHCO<sub>3</sub> solution (50 mL). The organic layer was separated and the aqueous layer was extracted with CH<sub>2</sub>Cl<sub>2</sub> (50 mL×3). The combined organic phase was washed with brine (50 mL), and then dried over anhydrous Na<sub>2</sub>SO<sub>4</sub>. The resulting residue was purified by column chromatography on silica gel to give the corresponding product **10** (two steps, 72% yield).

To an oven-dried flask was added **5** (1.81 g, 5.0 mmol), **10** (1.93 g, 6 mmol, 1.2 equiv.), DMAP (122.0 mg, 1 mmol, 0.2 equiv.) and EDCI (1.25 g, 6.5 mmol, 1.3 equiv.), followed by the addition of DCM (20 mL). The reaction mixture was stirred for 6 h at room temperature. After completion (monitored by TLC), the reaction mixture was directly subjected to by flash chromatography on silica gel using petroleum ether/ethyl acetate = 5:1 as eluent to provide the product **11** (60–65% yield).

***N*<sup>1</sup>-((1*R*,2*R*)-2-(2-(bis(3,5-dimethylphenyl)phosphaneyl)benzamido)-1,2-diphenylethyl)-*N*<sup>2</sup>,*N*<sup>2</sup>-diisopropylloxalamide (L11)**

Following *General procedure A*, the product **L11** was obtained after column chromatography

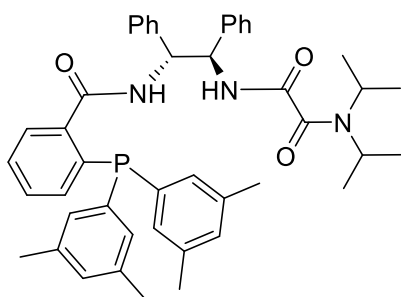

(petroleum ether/EtOAc 5:1 v/v); white solid; mp 109 –

110 °C; 25.2% yield (2.7 g);  $[\alpha]_D^{25} = -50.0$  (c 0.1, CHCl<sub>3</sub>);

<sup>1</sup>H NMR (400 MHz, CDCl<sub>3</sub>) δ 8.09 (d, *J* = 8.0 Hz, 1H),

7.72 (ddd, *J* = 7.6, 3.8, 1.4 Hz, 1H), 7.36 (td, *J* = 7.4, 1.4

Hz, 1H), 7.32 – 7.28 (m, 1H), 7.17 – 7.07 (m, 8H), 6.99 –

6.92 (m, 3H), 6.89 (s, 1H), 6.87 – 6.80 (m, 2H), 6.80 – 6.68 (m, 4H), 5.41 (dd, *J* = 10.0, 8.0 Hz,

1H), 5.18 (dd, *J* = 10.0, 8.0 Hz, 1H), 4.46 (p, *J* = 6.6 Hz, 1H), 3.43 (p, *J* = 6.8 Hz, 1H), 2.20 (d, *J*

= 9.0 Hz, 12H), 1.40 (dd, *J* = 10.4, 6.8 Hz, 6H), 1.10 (d, *J* = 6.6 Hz, 3H), 1.02 (d, *J* = 6.6 Hz, 3H);

<sup>13</sup>C NMR (101 MHz, CDCl<sub>3</sub>) δ 169.5, 163.8, 163.1, 141.0, 140.7, 138.4, 138.0, 137.9, 137.8,

137.7, 136.7, 136.6, 136.5, 136.4, 136.1, 134.4, 131.8, 131.6, 131.5, 131.3, 130.6, 130.6, 130.2,

128.7, 128.4, 128.4, 127.6, 127.6, 127.5, 127.5, 59.3, 58.6, 49.8, 46.3, 21.3, 20.8, 20.7, 20.2, 20.0;

<sup>31</sup>P NMR (162MHz, CDCl<sub>3</sub>) δ -11.34; IR (KBr)  $\nu_{\max}$ : 1671, 1639, 1497, 1245, 697 cm<sup>-1</sup>; HRMS

(ESI): *m/z* = 712.3671 (calcd for C<sub>45</sub>H<sub>50</sub>N<sub>3</sub>O<sub>3</sub>P+H<sup>+</sup> = 712.3663).

***N*<sup>1</sup>-((1*R*,2*R*)-2-(2-(bis(3,5-bis(trifluoromethyl)phenyl)phosphaneyl)benzamido)-1,2-diphenylethyl)-*N*<sup>2</sup>,*N*<sup>2</sup>-diisopropylloxalamide (L12)**

Following *General procedure A*, the product **L12** was obtained after column chromatography

(petroleum ether/EtOAc 5:1 v/v); white solid; mp 122–123 °C; 29.9% yield (3.2 g);  $[\alpha]_D^{25} = -34.0$

(c 0.1, CHCl<sub>3</sub>); <sup>1</sup>H NMR (400 MHz, CDCl<sub>3</sub>) δ 8.09 (s, 1H), 7.76 (d, *J* = 7.4 Hz, 2H), 7.67 (s, 2H),

7.50 (dd, *J* = 11.2, 6.2 Hz, 4H), 7.38 (d, *J* = 7.4 Hz, 1H), 7.33 (d, *J* = 7.4 Hz, 1H), 7.08 (d, *J* = 27.4

Hz, 10H), 6.74 (s, 1H), 5.49 (t, *J* = 8.6 Hz, 1H), 5.40 (d, *J* = 8.2 Hz, 1H), 4.07 – 3.91 (m, 1H),

3.37 – 3.22 (m, 1H), 1.19 (d, *J* = 6.4 Hz, 3H), 1.13 (d, *J* = 7.0 Hz, 3H), 0.97 (d, *J* = 6.8 Hz, 3H),

0.87 (d,  $J = 6.6$  Hz, 3H);  $^{13}\text{C}$  NMR (101 MHz,  $\text{CDCl}_3$ )  $\delta$  167.2, 164.3, 163.6, 141.5, 141.3, 141.1, 139.3, 139.1, 138.6, 137.2, 135.1, 134.9, 134.4, 133.6, 133.3, 133.1, 132.02, 131.95, 131.9, 131.8,

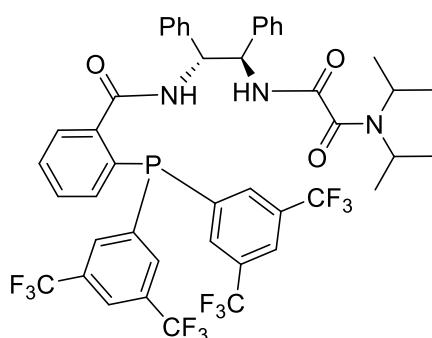

131.7, 131.62, 131.55, 131.51, 130.2, 128.7, 128.5, 128.1, 127.7, 127.4, 127.0, 124.44, 124.39, 122.9, 121.7, 121.7, 58.9, 58.4, 51.6, 50.3, 46.4, 33.05, 20.7, 20.5, 19.9, 19.8;  $^{31}\text{P}$  NMR (162MHz,  $\text{CDCl}_3$ )  $\delta$  -6.963;  $^{19}\text{F}$  NMR (564 MHz,  $\text{CDCl}_3$ )  $\delta$  -62.96; IR (KBr)  $\nu_{\text{max}}$ : 1665, 1610, 1527, 1352, 1277, 1122, 896, 698, 681  $\text{cm}^{-1}$ ;

HRMS (ESI):  $m/z = 950.2350$  (calcd for  $\text{C}_{45}\text{H}_{38}\text{F}_{12}\text{N}_3\text{O}_3\text{PNa}^+ = 950.2352$ ).

**$N^1$ -((1*R*,2*R*)-2-(2-(bis(3,5-dimethylphenyl)phosphaneyl)benzamido)-1,2-diphenylethyl)- $N^2,N^2$ -diphenyloxalamidee (L13)**

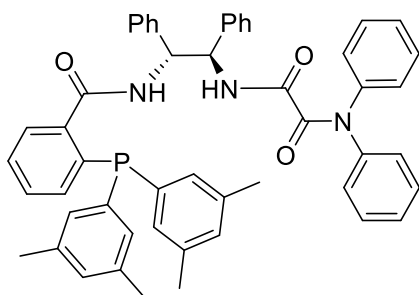

Following *General procedure A*, the product **L13** was obtained after column chromatography (petroleum ether/EtOAc 5:1 v/v); white solid; mp 123–124 °C; 23.5% yield (2.8 g);  $[\alpha]_{\text{D}}^{25} = -27.8$  (c 0.2,  $\text{CHCl}_3$ );  $^1\text{H}$  NMR (400 MHz,  $\text{CDCl}_3$ )  $\delta$  8.71 (d,  $J = 7.8$  Hz, 1H), 7.75 (d,  $J = 3.6$  Hz, 1H), 7.39 (q,  $J = 6.8, 6.2$  Hz, 2H), 7.25 –

7.00 (m, 20H), 6.97 (s, 1H), 6.92 (d,  $J = 8.0$  Hz, 1H), 6.83 (t,  $J = 7.2$  Hz, 6H), 5.53 – 5.43 (m, 1H), 5.15 – 5.05 (m, 1H), 2.25 (s, 12H);  $^{13}\text{C}$  NMR (101 MHz,  $\text{CDCl}_3$ )  $\delta$  170.2, 163.0, 161.6, 142.2, 141.3, 141.0, 138.5, 138.3, 138.2, 138.0, 137.9, 137.6, 136.7, 136.6, 136.2, 136.1, 135.9, 135.7, 134.5, 131.8, 131.6, 131.5, 131.3, 130.8, 130.4, 129.0, 128.9, 128.8, 128.7, 128.5, 128.2, 127.8, 60.3, 21.4;  $^{31}\text{P}$  NMR (162MHz,  $\text{CDCl}_3$ )  $\delta$  -11.87; IR (KBr)  $\nu_{\text{max}}$ : 1656, 1491, 1028, 846, 753, 694  $\text{cm}^{-1}$ ; HRMS (ESI):  $m/z = 780.3355$  (calcd for  $\text{C}_{51}\text{H}_{46}\text{N}_3\text{O}_3\text{P} + \text{H}^+ = 780.3350$ ).

### 3. Preparation of vinyl benzoxazinaone and N-tosylhydrazone sodium

Vinyl benzoxazinaone was prepared according to the same procedure in the literature reported.<sup>[6-8]</sup>

N-tosylhydrazone sodium was prepared according to the same procedure in the literature reported.<sup>[9,10]</sup>

## 4. Optimization of reaction conditions

**Table S1.** Screening of ligands <sup>[a]</sup>

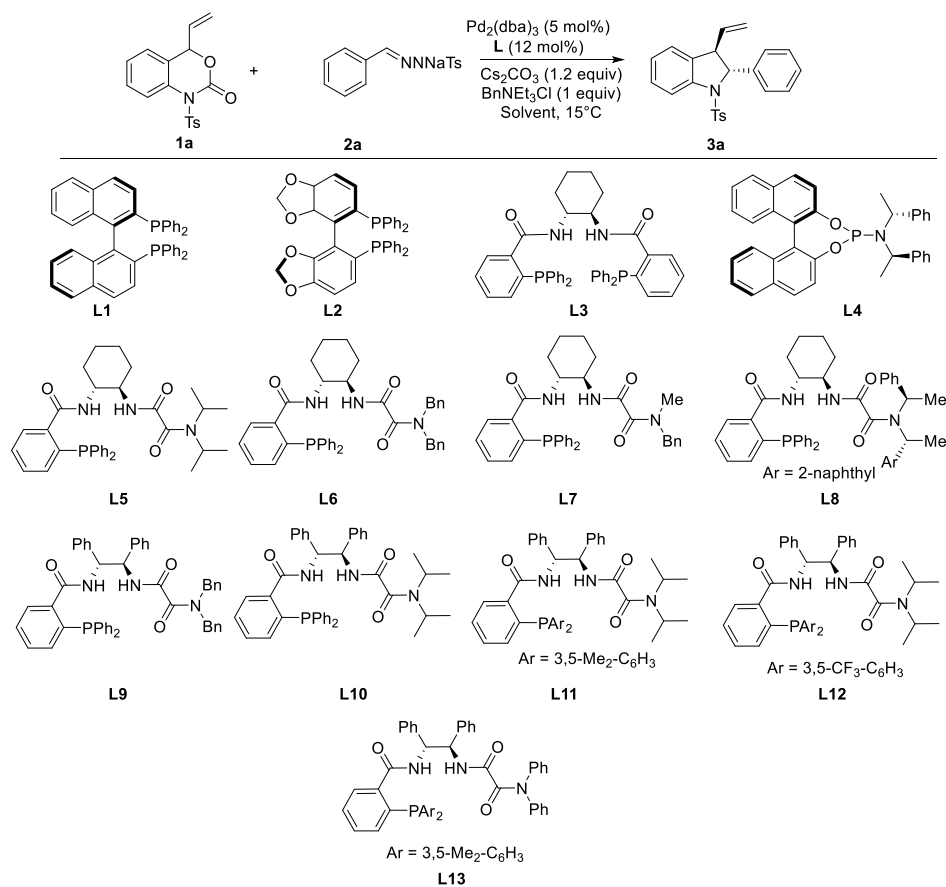

| entry           | Ligand     | Solvent                          | Yield (%) | <i>dr</i> | <i>ee</i> (%) |
|-----------------|------------|----------------------------------|-----------|-----------|---------------|
| 1               | <b>L1</b>  | DCM                              | NR        | --        | --            |
| 2               | <b>L2</b>  | DCM                              | NR        | --        | --            |
| 3               | <b>L3</b>  | DCM                              | NR        | --        | --            |
| 4               | <b>L4</b>  | DCM                              | 35        | >20:1     | 0             |
| 5 <sup>b</sup>  | <b>L5</b>  | DCM                              | 38        | >20:1     | 57            |
| 6 <sup>b</sup>  | <b>L6</b>  | DCM                              | 40        | >20:1     | 36            |
| 7 <sup>b</sup>  | <b>L7</b>  | DCM                              | 39        | >20:1     | 55            |
| 8 <sup>b</sup>  | <b>L8</b>  | DCM                              | 41        | >20:1     | 38            |
| 9 <sup>b</sup>  | <b>L9</b>  | DCM                              | 40        | >20:1     | 36            |
| 10 <sup>b</sup> | <b>L10</b> | DCM                              | 45        | >20:1     | 87            |
| 11              | <b>L10</b> | DCM                              | 71        | >20:1     | 76            |
| 12              | <b>L10</b> | DCM/ <i>i</i> -PrOH <sup>c</sup> | 71        | >20:1     | 84            |
| 13              | <b>L11</b> | DCM/ <i>i</i> -PrOH <sup>c</sup> | 78        | >20:1     | 91            |
| 14              | <b>L12</b> | DCM/ <i>i</i> -PrOH <sup>c</sup> | 56        | >20:1     | 11            |



15      **L13**      DCM/*i*-PrOH<sup>c</sup>      65      >20:1      73

<sup>a</sup> Reaction conditions: **1a** (0.1 mmol), **2a** (0.12 mmol), Pd<sub>2</sub>(dba)<sub>3</sub> (5 mol%), ligand (12 mol%), Cs<sub>2</sub>CO<sub>3</sub> (0.12 mmol), BnNEt<sub>3</sub>Cl (0.1 mmol), 1 mL of dichloromethane/*i*-PrOH (10:1) at 15°C for 24 hours. Isolated yield. The *dr* values were determined by <sup>1</sup>H NMR. The *ee* values were determined by chiral HPLC.

<sup>b</sup> at -10°C

<sup>c</sup> a mixture of DCM and *i*-PrOH (10:1 v/v, 1 mL)

**Table S2.** Screening of the metal salt <sup>[a]</sup>

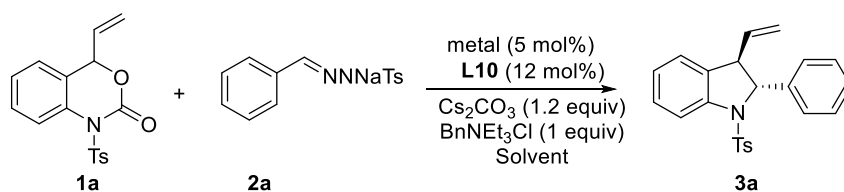

| Entry | Metal                                                              | Solvent | Ligand     | Temp. (°C) | Yield (%) | <i>dr</i> | <i>ee</i> (%) |
|-------|--------------------------------------------------------------------|---------|------------|------------|-----------|-----------|---------------|
| 1     | Pd <sub>2</sub> (dba) <sub>3</sub>                                 | DCM     | <b>L10</b> | 15         | 71        | >20:1     | 76            |
| 2     | Pd <sub>2</sub> (dba) <sub>3</sub> ·CHCl <sub>3</sub>              | DCM     | <b>L10</b> | 15         | 70        | >20:1     | 76            |
| 3     | Pd(dba) <sub>2</sub>                                               | DCM     | <b>L10</b> | -10        | 39        | >20:1     | 76            |
| 4     | Pd(PPh <sub>3</sub> ) <sub>4</sub>                                 | DCE     | <b>L10</b> | -10        | nr        | >20:1     | --            |
| 5     | (PPh <sub>3</sub> ) <sub>2</sub> PdCl <sub>2</sub>                 | DCM     | <b>L10</b> | -10        | nr        | >20:1     | --            |
| 6     | Pd(R-BINAP)Cl <sub>2</sub>                                         | DCM     | <b>L10</b> | -10        | nr        | >20:1     | --            |
| 7     | Pd(PhCN) <sub>2</sub> Cl <sub>2</sub>                              | DCM     | <b>L10</b> | -10        | nr        | >20:1     | --            |
| 8     | Pd[P( <i>t</i> Bu) <sub>3</sub> ] <sub>2</sub>                     | DCM     | <b>L10</b> | -10        | nr        | >20:1     | --            |
| 9     | NiCl <sub>2</sub> (PPh <sub>3</sub> ) <sub>2</sub>                 | DCE     | <b>L10</b> | -10        | nr        | >20:1     | --            |
| 10    | RhCl(P(C <sub>6</sub> H <sub>5</sub> ) <sub>3</sub> ) <sub>3</sub> | DCM     | <b>L10</b> | -10        | nr        | >20:1     | --            |

<sup>a</sup> Reaction conditions: **1a** (0.1 mmol), **2a** (0.12 mmol), metal (5 mol%), ligand (12 mol%), Cs<sub>2</sub>CO<sub>3</sub> (0.12 mmol), BnNEt<sub>3</sub>Cl (0.1 mmol), 1 mL of solvent for 24 hours. Isolated yield. The *dr* values were determined by <sup>1</sup>H NMR. The *ee* values were determined by chiral HPLC.

**Table S3.** Screening of the solvents and reaction temperature <sup>[a]</sup>

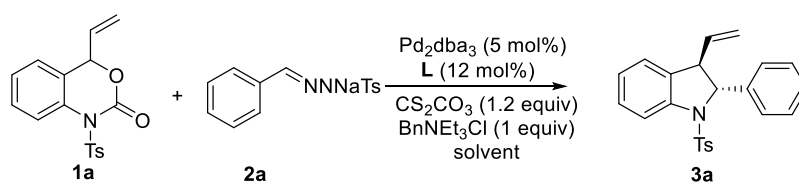

| Entry | Solvent | Ligand     | Temp. (°C) | Yield (%) | <i>dr</i> | <i>ee</i> (%) |
|-------|---------|------------|------------|-----------|-----------|---------------|
| 1     | DCE     | <b>L10</b> | -10        | 45        | > 20 : 1  | 73            |

|    |                        |            |     |       |          |    |
|----|------------------------|------------|-----|-------|----------|----|
| 2  | CH <sub>3</sub> CN     | <b>L10</b> | -10 | 39    | > 20 : 1 | 81 |
| 3  | Toluene                | <b>L10</b> | -10 | 33    | > 20 : 1 | 49 |
| 4  | CHCl <sub>3</sub>      | <b>L10</b> | -10 | Trace | --       | -- |
| 5  | CCl <sub>4</sub>       | <b>L10</b> | -10 | Trace | --       | -- |
| 6  | MTBE                   | <b>L10</b> | -10 | Trace | --       | -- |
| 7  | Acetone                | <b>L10</b> | -10 | Trace | --       | -- |
| 8  | DCM                    | <b>L10</b> | -10 | 45    | > 20 : 1 | 87 |
| 9  | DCM                    | <b>L10</b> | 15  | 71    | > 20 : 1 | 76 |
| 10 | DCM +Toluene           | <b>L10</b> | 15  | 65    | > 20 : 1 | 77 |
| 11 | DCM + DMSO             | <b>L10</b> | 15  | 70    | > 20 : 1 | 72 |
| 12 | DCM+CH <sub>3</sub> OH | <b>L10</b> | 15  | 72    | > 20 : 1 | 80 |
| 13 | DCM+ <i>i</i> -PrOH    | <b>L10</b> | 15  | 71    | > 20 : 1 | 84 |
| 14 | DCM                    | <b>L10</b> | 25  | 78    | > 20 : 1 | 74 |
| 15 | DCM                    | <b>L11</b> | -10 | 45    | > 20 : 1 | 86 |
| 16 | Toluene                | <b>L11</b> | 25  | 68    | > 20 : 1 | 44 |
| 17 | MeCN                   | <b>L11</b> | 25  | 69    | > 20 : 1 | 64 |
| 18 | DCE                    | <b>L11</b> | 25  | 78    | > 20 : 1 | 72 |
| 19 | DCM/ <i>i</i> -PrOH    | <b>L11</b> | 15  | 78    | > 20 : 1 | 91 |

<sup>a</sup> Reaction conditions: **1a** (0.1 mmol), **2a** (0.12 mmol), metal (5 mol%), ligand (12 mol%), Cs<sub>2</sub>CO<sub>3</sub> (0.12 mmol), BnNEt<sub>3</sub>Cl (0.1 mmol), 1 mL of solvent for 24 hours. Isolated yield. The *dr* values were determined by <sup>1</sup>H NMR. The *ee* values were determined by chiral HPLC.

**Table S4.** Screening of the base <sup>[a]</sup>

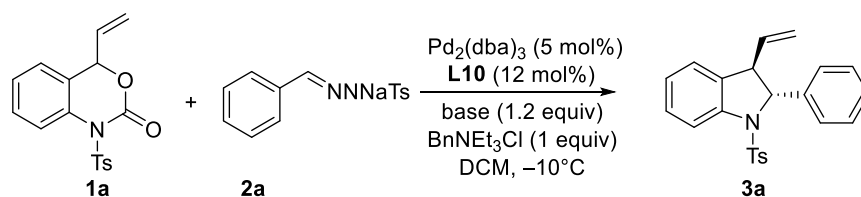

| Entry | Base                            | Solvent | Temp. (°C) | Yield (%) | <i>dr</i> | <i>ee</i> (%) |
|-------|---------------------------------|---------|------------|-----------|-----------|---------------|
| 1     | CS <sub>2</sub> CO <sub>3</sub> | DCM     | -10        | 45        | > 20 : 1  | 87            |
| 2     | K <sub>2</sub> CO <sub>3</sub>  | DCM     | -10        | 44        | > 20 : 1  | 65            |
| 3     | Li <sub>2</sub> CO <sub>3</sub> | DCM     | -10        | 40        | > 20 : 1  | 74            |
| 4     | Na <sub>2</sub> CO <sub>3</sub> | DCM     | -10        | 43        | > 20 : 1  | 78            |
| 5     | KHCO <sub>3</sub>               | DCM     | -10        | 41        | > 20 : 1  | 70            |
| 6     | Et <sub>3</sub> N               | DCM     | -10        | 39        | > 20 : 1  | 70            |
| 7     | Quinoline                       | DCM     | -10        | 38        | > 20 : 1  | 71            |

<sup>a</sup> Reaction conditions: **1a** (0.1 mmol), **2a** (0.12 mmol), metal (5 mol%), ligand (12 mol%), Cs<sub>2</sub>CO<sub>3</sub>

(0.12 mmol), BnNEt<sub>3</sub>Cl (0.1 mmol), 1 mL of solvent for 24 hours. Isolated yield. The *dr* values were determined by <sup>1</sup>H NMR. The *ee* values were determined by chiral HPLC.

**Table S5.** Screening of the additives <sup>[a]</sup>

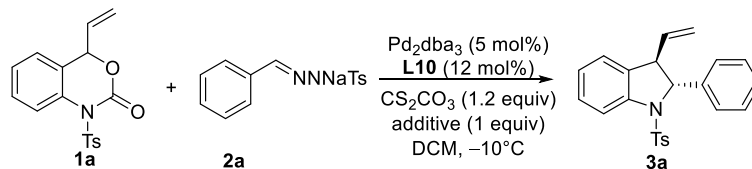

| Entry | Additive                            | Yield (%) | <i>dr</i> | <i>ee</i> (%) |
|-------|-------------------------------------|-----------|-----------|---------------|
| 1     | Benzyltriethylammonium chloride     | 45        | >20 : 1   | 87            |
| 2     | Tetrabutylammonium iodide           | 44        | >20 : 1   | 69            |
| 3     | Tetrabutylammonium chloride         | 40        | >20 : 1   | 78            |
| 4     | Tetrabutylammonium hydrogen sulfate | 42        | >20 : 1   | 71            |

<sup>a</sup> Reaction conditions: **1a** (0.1 mmol), **2a** (0.12 mmol), Pd<sub>2</sub>(dba)<sub>3</sub> (5 mol%), ligand (12 mol%), Cs<sub>2</sub>CO<sub>3</sub> (0.12 mmol), BnNEt<sub>3</sub>Cl (0.1 mmol), 1 mL of dichloromethane/*i*-PrOH (10:1) for 24 hours. Isolated yield. The *dr* values were determined by <sup>1</sup>H NMR. The *ee* values were determined by chiral HPLC.

**Table S6.** Screening of the concentration <sup>[a]</sup>

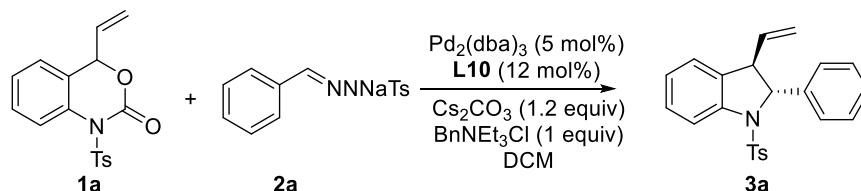

| entry | Solvent | Concentration(M) | Temp. (°C) | Yield (%) | <i>dr</i> | <i>ee</i> (%) |
|-------|---------|------------------|------------|-----------|-----------|---------------|
| 1     | DCM     | 0.1              | -10        | 45        | >20 : 1   | 87            |
| 2     | DCM     | 0.05             | -10        | 45        | >20 : 1   | 77            |
| 3     | DCM     | 0.025            | -10        | 45        | >20 : 1   | 76            |

<sup>a</sup> Reaction conditions: **1a** (0.1 mmol), **2a** (0.12 mmol), Pd<sub>2</sub>(dba)<sub>3</sub> (5 mol%), ligand (12 mol%), Cs<sub>2</sub>CO<sub>3</sub> (0.12 mmol), BnNEt<sub>3</sub>Cl (0.1 mmol), 1 mL of solvent for 24 hours. Isolated yield. The *dr* values were determined by <sup>1</sup>H NMR. The *ee* values were determined by chiral HPLC.

## 5. General procedure for the preparation of 3

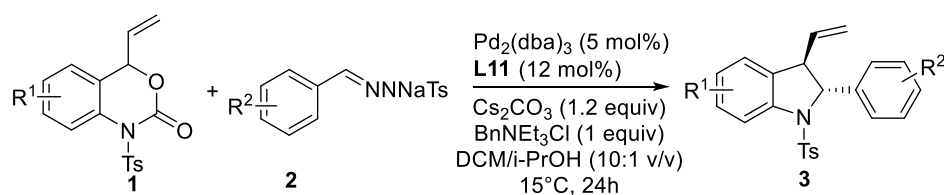

To a flame dried schlenk tube, Pd<sub>2</sub>(dba)<sub>3</sub> (4.6 mg, 0.005 mmol), (*R, R*)-**L11** (8.6 mg, 0.012 mmol) and dry DCM (1 mL) were added under nitrogen atmosphere. The mixture was stirred at 25 °C for 0.5 hour to produce a dark red solution and then *i*-PrOH (100 μL) was added. After that, vinyl benzoxazinone **1** (0.1 mmol), *N*-tosylhydrazone sodium salt **2** (0.12 mmol), Cs<sub>2</sub>CO<sub>3</sub> (0.12 mmol, 39.10mg), BnNEt<sub>3</sub>Cl (0.1 mmol, 22.50mg) were added. The mixture was stirred at 15 °C for 24 hours (monitored by TLC analysis) and then it was subjected to silica gel column to afford the desired products **3**.

The racemic samples **3** were synthesized according to the literature method without any modification.<sup>11</sup> To a flame-dried schlenk tube, Pd<sub>2</sub>(dba)<sub>3</sub> (4.6 mg, 0.005 mmol), dry THF (1 mL), vinyl benzoxazinone **1** (0.1 mmol), *N*-tosylhydrazone (0.12 mmol), and Cs<sub>2</sub>CO<sub>3</sub> (0.12 mmol, 39.10mg) were added. The mixture was stirred at 60 °C for 4 hours (monitored by TLC analysis) and then it was subjected to silica gel column to afford the desired racemic products **3**.

### (2*R,3R*)-2-phenyl-1-tosyl-3-vinylindoline (**3a**)

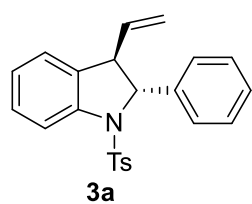

Following *General Procedure B*, the product **3a** was obtained after column chromatography (petroleum ether/EtOAc 50:1 v/v); light yellow oil; 78% yield (29.3 mg), >20:1 *dr*, 91% *ee* [Daicel Chiralpak AD-H, hexanes/*i*-propanol = 90/10, flow rate = 1.0 mL/min, λ = 254.4 nm, t (major) = 10.164, t (minor) = 18.572]; [α]<sub>D</sub><sup>25</sup> = -45.7 (c 0.10, CHCl<sub>3</sub>); <sup>1</sup>H NMR (400 MHz, CDCl<sub>3</sub>) δ 7.72 (d, *J* = 8.0 Hz, 1H), 7.53 – 7.49 (m, 2H), 7.25 – 7.17 (m, 6H), 7.11 (d, *J* = 8.0 Hz, 2H), 6.98 (td, *J* = 7.4, 1.0 Hz, 1H), 6.91 (d, *J* = 7.6 Hz, 1H), 5.17 – 5.07 (m, 1H), 4.84 (d, *J* = 3.6 Hz, 1H), 4.76 – 4.69 (m, 2H), 3.56 (dd, *J* = 8.2, 3.6 Hz, 1H), 2.29 (s, 3H); <sup>13</sup>C NMR (101 MHz, CDCl<sub>3</sub>) δ 143.0, 141.3, 140.8, 137.2, 133.7, 131.4, 128.5, 127.7, 127.6, 126.7, 126.4, 124.8, 124.7, 123.4, 115.0, 114.7, 70.1, 54.8, 20.5; IR (KBr) ν<sub>max</sub>: 2963, 2923, 1475, 1499, 1367, 1168, 662 cm<sup>-1</sup>; HRMS (ESI): *m/z* = 398.1161 (calcd for C<sub>23</sub>H<sub>21</sub>NO<sub>2</sub>S+Na<sup>+</sup> = 398.1185). The NMR data of **3a** was consistent with the data reported in the literature.<sup>[11]</sup>

### (2*R*,3*R*)-2-(*p*-tolyl)-1-tosyl-3-vinylindoline (**3b**)

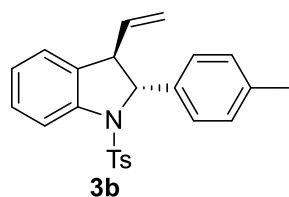

Following *General Procedure B*, the product **3b** was obtained after column chromatography (petroleum ether/EtOAc 50:1 v/v); light yellow oil ; 71% yield (27.70 mg), >20:1 *dr*, 90% *ee* [Daicel Chiralpak AD-H, hexanes/*i*-propanol = 90/10, flow rate = 1.0 mL/min,  $\lambda = 254.4$  nm,  $t$  (major) = 8.343,  $t$  (minor) = 17.096];  $[\alpha]_D^{25} = -51.02$  (c 0.10, CHCl<sub>3</sub>); <sup>1</sup>H NMR (400 MHz, CDCl<sub>3</sub>)  $\delta$  7.71 (d,  $J = 8.2$  Hz, 1H), 7.51 (d,  $J = 8.0$  Hz, 2H), 7.24 – 7.19 (m, 1H), 7.12 (dd,  $J = 12.4, 8.0$  Hz, 4H), 7.04 (d,  $J = 7.8$  Hz, 2H), 6.97 (d,  $J = 7.4$  Hz, 1H), 6.91 (d,  $J = 7.4$  Hz, 1H), 5.16 – 5.04 (m, 1H), 4.78 (d,  $J = 3.8$  Hz, 1H), 4.75 – 4.67 (m, 2H), 3.54 (dd,  $J = 8.2, 3.8$  Hz, 1H), 2.29 (s, 3H), 2.25 (s, 3H); <sup>13</sup>C NMR (101 MHz, CDCl<sub>3</sub>)  $\delta$  148.3, 143.9, 141.8, 139.6, 138.5, 134.9, 132.6, 129.4, 128.5, 127.4, 126.7, 125.8, 125.7, 124.4, 116.0, 115.5, 70.9, 55.6, 33.8, 24.0, 21.5; IR (KBr)  $\nu_{\max}$ : 2961, 2922, 2851, 1718, 1361, 1259, 1070, 797 cm<sup>-1</sup>; HRMS (ESI):  $m/z = 390.1526$  (calcd for C<sub>24</sub>H<sub>23</sub>NO<sub>2</sub>S+H<sup>+</sup> = 390.1523).

### (2*R*,3*R*)-2-(4-ethylphenyl)-1-tosyl-3-vinylindoline (**3c**)

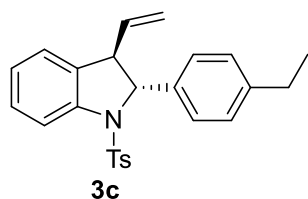

Following *General Procedure B*, the product **3c** was obtained after column chromatography (petroleum ether/EtOAc 50:1 v/v); light yellow oil ; 72% yield (27.70 mg), >20:1 *dr*, 93% *ee* [Daicel Chiralpak AD-H, hexanes/*i*-propanol = 90/10, flow rate = 1.0 mL/min,  $\lambda = 254.4$  nm,  $t$  (major) = 9.302,  $t$  (minor) = 15.676];  $[\alpha]_D^{25} = -53.14$  (c 0.10, CHCl<sub>3</sub>); <sup>1</sup>H NMR (400 MHz, CDCl<sub>3</sub>)  $\delta$  7.79 (d,  $J = 8.2$  Hz, 1H), 7.58 (d,  $J = 8.0$  Hz, 2H), 7.32 – 7.27 (m, 1H), 7.23 (d,  $J = 7.8$  Hz, 2H), 7.15 (dd,  $J = 16.4, 8.0$  Hz, 4H), 7.05 (t,  $J = 7.4$  Hz, 1H), 6.99 (d,  $J = 7.4$  Hz, 1H), 5.19 (ddd,  $J = 17.4, 9.6, 8.2$  Hz, 1H), 4.90 (d,  $J = 3.6$  Hz, 1H), 4.79 (dd,  $J = 13.4, 2.6$  Hz, 2H), 3.64 (dd,  $J = 8.2, 3.6$  Hz, 1H), 2.62 (q,  $J = 7.6$  Hz, 2H), 2.36 (s, 3H), 1.22 (t,  $J = 7.6$  Hz, 3H); <sup>13</sup>C NMR (101 MHz, CDCl<sub>3</sub>)  $\delta$  143.9, 143.7, 141.8, 139.6, 138.4, 134.8, 132.5, 129.5, 128.6, 128.2, 127.4, 125.8, 125.7, 124.4, 116.0, 115.6, 71.4, 60.0, 28.5, 20.9, 15.5; IR (KBr)  $\nu_{\max}$ : 2958, 2925, 2870, 1725, 1598, 1460, 1359, 1285, 1261, 1168, 773, 705 cm<sup>-1</sup>; HRMS (ESI):  $m/z = 404.1674$  (calcd for C<sub>25</sub>H<sub>25</sub>NO<sub>2</sub>S+H<sup>+</sup> = 404.1679).

### (2*R*,3*R*)-2-(4-isopropylphenyl)-1-tosyl-3-vinylindoline (**3d**)

Following *General Procedure B*, the product **3d** was obtained after column chromatography

(petroleum ether/EtOAc 50:1 v/v); light yellow oil ; 74% yield (30.86 mg), >20:1 *dr*, 90% *ee*  
 [Daicel Chiralpak AD-H, hexanes/*i*-propanol = 90/10, flow rate = 1.0 mL/min,  $\lambda$  = 254.4 nm, t

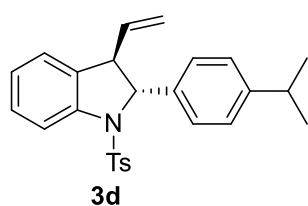

(major) = 7.454, t (minor) = 10.327];  $[\alpha]_D^{25}$  = -49.32 (c 0.10, CHCl<sub>3</sub>); <sup>1</sup>H NMR (400 MHz, CDCl<sub>3</sub>)  $\delta$  7.78 (d, *J* = 8.0 Hz, 1H), 7.56 (d, *J* = 8.2 Hz, 2H), 7.32 – 7.27 (m, 1H), 7.22 (d, *J* = 8.2 Hz, 2H), 7.15 (t, *J* = 7.8 Hz, 4H), 7.05 (t, *J* = 7.4 Hz, 1H), 6.99 (d, *J* = 7.2 Hz, 1H), 5.18 (ddd, *J* = 17.6, 9.6, 8.2 Hz, 1H), 4.91 (d, *J* = 3.4 Hz, 1H), 4.83 – 4.74 (m, 2H), 3.64 (dd, *J* = 8.2, 3.4 Hz, 1H), 2.87 (p, *J* = 6.8 Hz, 1H), 2.36 (s, 3H), 1.23 (d, *J* = 6.8 Hz, 6H); <sup>13</sup>C NMR (101 MHz, CDCl<sub>3</sub>)  $\delta$  148.1, 143.5, 141.8, 138.4, 134.8, 132.5, 129.4, 128.5, 127.4, 126.7, 125.8, 125.7, 124.4, 115.9, 115.5, 71.4, 56.5, 33.8, 23.99, 23.97, 21.5; IR (KBr)  $\nu_{\max}$ : 2958, 2924, 2870, 1725, 1598, 1476, 1460, 1360, 1168, 749, 663 cm<sup>-1</sup>; HRMS (ESI): *m/z* = 440.1648 (calcd for C<sub>26</sub>H<sub>27</sub>NO<sub>2</sub>S+Na<sup>+</sup> = 440.1655).

**(2R,3R)-2-(4-(*tert*-butyl)phenyl)-1-tosyl-3-vinylindoline (3e)**

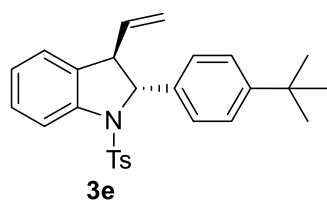

Following *General Procedure B*, the product **3e** was obtained after column chromatography (petroleum ether/EtOAc 50:1 v/v); light yellow oil ; 70% yield (30.17 mg), >20:1 *dr*, 89% *ee* [Daicel Chiralpak AD-H, hexanes/*i*-propanol = 90/10, flow rate = 1.0 mL/min,  $\lambda$  = 254.4 nm, t (major) = 7.479, t (minor) = 8.208];  $[\alpha]_D^{25}$  = -51.02 (c 0.10, CHCl<sub>3</sub>); <sup>1</sup>H NMR (400 MHz, CDCl<sub>3</sub>)  $\delta$  7.78 (d, *J* = 8.0 Hz, 1H), 7.56 (d, *J* = 8.2 Hz, 2H), 7.30 (d, *J* = 8.4 Hz, 3H), 7.23 (d, *J* = 8.4 Hz, 2H), 7.16 (d, *J* = 8.0 Hz, 2H), 7.05 (t, *J* = 6.8 Hz, 1H), 6.99 (d, *J* = 7.4 Hz, 1H), 5.19 (ddd, *J* = 17.6, 10.0, 8.2 Hz, 1H), 4.92 (d, *J* = 3.2 Hz, 1H), 4.84 – 4.74 (m, 2H), 3.65 (dd, *J* = 8.2, 3.2 Hz, 1H), 2.36 (s, 3H), 1.29 (s, 9H); <sup>13</sup>C NMR (101 MHz, CDCl<sub>3</sub>)  $\delta$  150.5, 143.9, 141.8, 139.2, 138.5, 135.0, 132.6, 129.4, 128.5, 127.4, 125.7, 125.6, 125.5, 124.4, 116.0, 115.4, 70.8, 55.6, 34.9, 31.4, 21.5; IR (KBr)  $\nu_{\max}$ : 2961, 2923, 2852, 1359, 1259, 1091, 1017, 799, 663 cm<sup>-1</sup>; HRMS (ESI): *m/z* = 454.1828 (calcd for C<sub>27</sub>H<sub>29</sub>NO<sub>2</sub>S+Na<sup>+</sup> = 454.1811).

**(2R,3R)-2-(4-methoxyphenyl)-1-tosyl-3-vinylindoline (3f)**

Following *General Procedure B*, the product **3f** was obtained after column chromatography (petroleum ether/EtOAc 40:1 v/v); light yellow oil; 78% yield (31.59 mg), >20:1 *dr*, 90% *ee* [Daicel Chiralpak AD-H, hexanes/*i*-propanol = 90/10, flow rate = 1.0 mL/min,  $\lambda$  = 254.4 nm, t

(major) = 13.375, t (minor) = 31.645];  $[\alpha]_D^{25} = -53.25$  (c 0.10, CHCl<sub>3</sub>); <sup>1</sup>H NMR (400 MHz, CDCl<sub>3</sub>) δ 7.80 (d, *J* = 8.0 Hz, 1H), 7.60 (d, *J* = 8.4 Hz, 2H), 7.34 – 7.25 (m, 3H), 7.20 (d, *J* = 8.0 Hz,

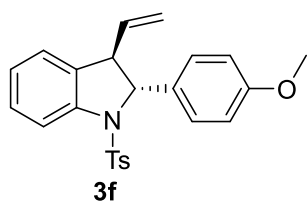

2H), 7.11 – 7.00 (m, 2H), 6.86 (d, *J* = 8.6 Hz, 2H), 5.26 – 5.16 (m, 1H), 4.88 (d, *J* = 3.6 Hz, 1H), 4.85 – 4.76 (m, 2H), 3.81 (s, 3H), 3.64 (dd, *J* = 8.2, 3.8 Hz, 1H), 2.39 (s, 3H); <sup>13</sup>C NMR (101 MHz, CDCl<sub>3</sub>) δ 143.9, 141.7, 138.3, 134.8, 134.5, 132.5, 132.0, 129.5, 128.6, 127.4,

127.2, 125.7, 124.4, 115.9, 115.7, 114.1, 70.8, 55.8, 55.3, 20.2; IR (KBr)  $\nu_{\max}$ : 2958, 2922, 2851, 1724, 1355, 1260, 1168, 1074, 662 cm<sup>-1</sup>; HRMS (ESI): *m/z* = 428.1296 (calcd for C<sub>24</sub>H<sub>23</sub>NO<sub>3</sub>S+Na<sup>+</sup> = 428.1291).

### (2*R*,3*R*)-2-(4-fluorophenyl)-1-tosyl-3-vinylindoline (**3g**)

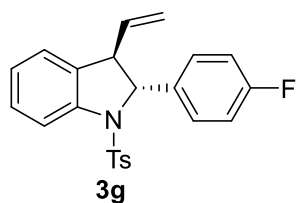

Following *General Procedure B*, the product **3g** was obtained after column chromatography (petroleum ether/EtOAc 50:1 v/v); light yellow oil ; 72% yield (28.30 mg), >20:1 *dr*, 91% *ee* [Daicel Chiralpak AD-H, hexanes/*i*-propanol = 90/10, flow rate = 1.0

mL/min,  $\lambda$  = 254.4 nm, t (major) = 8.446, t (minor) = 14.942];  $[\alpha]_D^{25} = -45.78$  (c 0.10, CHCl<sub>3</sub>); <sup>1</sup>H NMR (400 MHz, CDCl<sub>3</sub>) δ 7.73 (d, *J* = 8.2 Hz, 1H), 7.52 (d, *J* = 8.0 Hz, 2H), 7.25 – 7.19 (m, 3H), 7.13 (d, *J* = 8.0 Hz, 2H), 7.00 (t, *J* = 5.8 Hz, 1H), 6.96 – 6.90 (m, 3H), 5.11 (ddd, *J* = 16.6, 10.0, 8.2 Hz, 1H), 4.80 (d, *J* = 3.8 Hz, 1H), 4.78 – 4.70 (m, 2H), 3.52 (dd, *J* = 8.2, 3.8 Hz, 1H), 2.31 (s, 3H); <sup>13</sup>C NMR (101 MHz, CDCl<sub>3</sub>) δ 162.6 (d, *J*<sub>C-F</sub> = 183.4 Hz), 144.2, 141.6, 138.0, 134.5, 132.2, 129.5, 129.0, 128.7, 128.4, 127.59 (d, *J*<sub>C-F</sub> = 8.2 Hz), 127.4, 125.7, 124.6, 116.0 (d, *J*<sub>C-F</sub> = 2.3 Hz), 115.6 (d, *J*<sub>C-F</sub> = 8.2 Hz), 70.53, 55.9, 20.7.; <sup>19</sup>F NMR (564 MHz, CDCl<sub>3</sub>) δ -114.85; IR (KBr)  $\nu_{\max}$ : 2921, 2851, 1354, 1260, 1164, 1089, 811, 662 cm<sup>-1</sup>; HRMS (ESI): *m/z* = 416.1090 (calcd for C<sub>23</sub>H<sub>20</sub>FNO<sub>2</sub>S+Na<sup>+</sup> = 416.1091).

### (2*R*,3*R*)-2-(4-chlorophenyl)-1-tosyl-3-vinylindoline (**3h**)

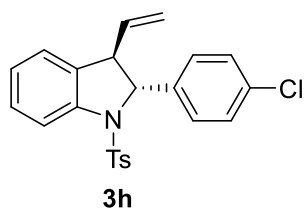

Following *General Procedure B*, the product **3h** was obtained after column chromatography (petroleum ether/EtOAc 50:1 v/v); light yellow oil ; 76% yield (31.08 mg), >20:1 *dr*, 91% *ee* [Daicel Chiralpak AD-H, hexanes/*i*-propanol = 90/10, flow rate = 1.0

mL/min,  $\lambda$  = 254.4 nm, t (major) = 8.471, t (minor) = 16.007];  $[\alpha]_D^{25} = -43.13$  (c 0.10, CHCl<sub>3</sub>); <sup>1</sup>H

NMR (400 MHz, CDCl<sub>3</sub>) δ 7.79 (d, *J* = 8.0 Hz, 1H), 7.58 (d, *J* = 8.2 Hz, 2H), 7.34 – 7.26 (m, 5H), 7.19 (d, *J* = 8.0 Hz, 2H), 7.09 – 7.04 (m, 1H), 6.98 (d, *J* = 7.4 Hz, 1H), 5.18 (ddd, *J* = 16.8, 10.0, 8.2 Hz, 1H), 4.86 – 4.76 (m, 3H), 3.57 (dd, *J* = 8.4, 3.8 Hz, 1H), 2.37 (s, 3H); <sup>13</sup>C NMR (101 MHz, CDCl<sub>3</sub>) δ 144.2, 141.6, 140.8, 137.9, 134.4, 133.5, 132.0, 129.6, 128.9, 128.7, 127.4, 127.3, 125.7, 124.6, 116.1, 116.0, 70.5, 55.8, 21.5; IR (KBr)  $\nu_{\max}$ : 2956, 2920, 2851, 1725, 1358, 1168, 1090, 664 cm<sup>-1</sup>; HRMS (ESI): *m/z* = 432.0792 (calcd for C<sub>23</sub>H<sub>20</sub>ClNO<sub>2</sub>S+Na<sup>+</sup> = 432.0796).

**(2*R*,3*R*)-2-(4-bromophenyl)-1-tosyl-3-vinylindoline (3i)**

Following *General Procedure B*, the product **3i** was obtained after column chromatography (petroleum ether/EtOAc 50:1 v/v); light yellow oil ; 73% yield (33.07 mg), >20:1 *dr*, 91% *ee*

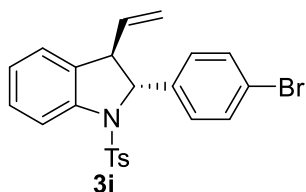

[Daicel Chiralpak AD-H, hexanes/*i*-propanol = 90/10, flow rate = 1.0 mL/min,  $\lambda$  = 254.4 nm, *t* (major) = 8.841, *t* (minor) = 16.814]; [ $\alpha$ ]<sub>D</sub><sup>25</sup> = -44.57 (c 0.10, CHCl<sub>3</sub>); <sup>1</sup>H NMR (400 MHz, CDCl<sub>3</sub>) δ 7.80 (d, *J* = 8.2 Hz, 1H), 7.58 (d, *J* = 8.2 Hz, 2H), 7.43

(d, *J* = 8.4 Hz, 2H), 7.34 – 7.28 (m, 1H), 7.20 (dd, *J* = 8.0, 5.0 Hz, 4H), 7.07 (t, *J* = 7.4 Hz, 1H), 6.98 (d, *J* = 7.4 Hz, 1H), 5.18 (ddd, *J* = 16.8, 10.0, 8.2 Hz, 1H), 4.86 – 4.76 (m, 3H), 3.57 (dd, *J* = 8.2, 3.8 Hz, 1H), 2.37 (s, 3H); <sup>13</sup>C NMR (101 MHz, CDCl<sub>3</sub>) δ 144.3, 142.1, 141.3, 137.9, 134.4, 132.0, 131.8, 130.0, 128.8, 127.7, 127.4, 125.7, 124.6, 121.6, 116.1, 116.0, 70.6, 55.7, 21.6; IR (KBr)  $\nu_{\max}$ : 2956, 2922, 2854, 1724, 1598, 1357, 1168, 664 cm<sup>-1</sup>; HRMS (ESI): *m/z* = 476.0298 (calcd for C<sub>23</sub>H<sub>20</sub>NO<sub>2</sub>SBr+Na<sup>+</sup> = 476.0291).

**(2*R*,3*R*)-2-(4-iodophenyl)-1-tosyl-3-vinylindoline (3j)**

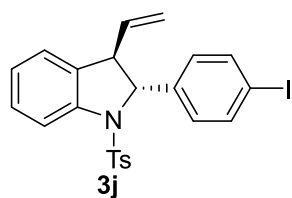

Following *General Procedure B*, the product **3j** was obtained after column chromatography (petroleum ether/EtOAc 50:1 v/v); light yellow oil ; 70% yield (35.07 mg), >20:1 *dr*, 90% *ee* [Daicel Chiralpak AD-H, hexanes/*i*-propanol = 90/10, flow rate = 1.0

mL/min,  $\lambda$  = 254.4 nm, *t* (major) = 10.362, *t* (minor) = 19.189]; [ $\alpha$ ]<sub>D</sub><sup>25</sup> = -45.15 (c 0.10, CHCl<sub>3</sub>); <sup>1</sup>H NMR (400 MHz, CDCl<sub>3</sub>) δ 7.79 (d, *J* = 8.0 Hz, 1H), 7.63 (d, *J* = 8.2 Hz, 2H), 7.57 (d, *J* = 8.2 Hz, 2H), 7.29 (d, *J* = 8.0 Hz, 1H), 7.19 (d, *J* = 8.0 Hz, 2H), 7.06 (t, *J* = 7.8 Hz, 3H), 6.98 (d, *J* = 7.4 Hz, 1H), 5.18 (ddd, *J* = 16.8, 10.0, 8.2 Hz, 1H), 4.88 – 4.75 (m, 3H), 3.57 (dd, *J* = 8.2, 3.8 Hz, 1H), 2.37 (s, 3H); <sup>13</sup>C NMR (101 MHz, CDCl<sub>3</sub>) δ 144.2, 142.0, 141.4, 137.9, 137.8, 134.4, 132.0,



129.6, 128.8, 127.9, 127.4, 125.7, 124.6, 116.1, 90.2, 115.9, 70.7, 55.7, 21.6; IR (KBr)  $\nu_{\max}$ : 2959, 2923, 2852, 1718, 1357, 1167, 812, 665  $\text{cm}^{-1}$ ; HRMS (ESI):  $m/z = 524.0159$  (calcd for  $\text{C}_{23}\text{H}_{20}\text{NO}_2\text{S}+\text{Na}^+ = 524.0152$ ).

**(2R,3R)-1-tosyl-2-(4-(trifluoromethyl)phenyl)-3-vinylindoline (3k)**

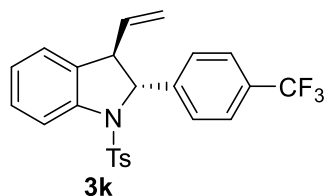

Following *General Procedure B*, the product **3k** was obtained after column chromatography (petroleum ether/EtOAc 50:1 v/v); light yellow oil ; 67% yield (29.68 mg), >20:1 *dr*, 82% *ee* [Daicel Chiralpak AD-H, hexanes/*i*-propanol = 90/10, flow rate = 1.0 mL/min,  $\lambda = 254.4$  nm,  $t$  (major) = 7.803,  $t$  (minor) = 11.386];  $[\alpha]_{\text{D}}^{25} = -39.59$  (c 0.10,  $\text{CHCl}_3$ );  $^1\text{H}$  NMR (400 MHz,  $\text{CDCl}_3$ )  $\delta$  7.82 (d,  $J = 8.0$  Hz, 1H), 7.58 (dd,  $J = 8.2, 6.2$  Hz, 4H), 7.45 (d,  $J = 8.0$  Hz, 2H), 7.32 (t,  $J = 7.6$  Hz, 1H), 7.20 (d,  $J = 8.0$  Hz, 2H), 7.08 (t,  $J = 7.4$  Hz, 1H), 6.99 (d,  $J = 7.4$  Hz, 1H), 5.20 (ddd,  $J = 16.8, 10.0, 8.2$  Hz, 1H), 4.92 (d,  $J = 4.0$  Hz, 1H), 4.88 – 4.77 (m, 2H), 3.59 (dd,  $J = 8.4, 3.8$  Hz, 1H), 2.37 (s, 3H);  $^{13}\text{C}$  NMR (101 MHz,  $\text{CDCl}_3$ )  $\delta$  146.1, 144.3, 141.6, 137.8, 134.3, 131.8, 129.6, 128.8, 127.4, 126.2, 125.80, 125.77, 125.73, 125.72, 124.7, 116.3, 116.0, 70.6, 55.7, 21.5; IR (KBr)  $\nu_{\max}$ : 2957, 2921, 2851, 1724, 1259, 1087, 662  $\text{cm}^{-1}$ ; HRMS (ESI):  $m/z = 466.1057$  (calcd for  $\text{C}_{24}\text{H}_{20}\text{F}_3\text{NO}_2\text{S}+\text{Na}^+ = 466.1059$ ).

**(2R,3R)-2-(*m*-tolyl)-1-tosyl-3-vinylindoline (3l)**

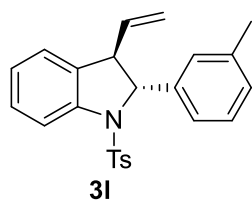

Following *General Procedure B*, the product **3l** was obtained after column chromatography (petroleum ether/EtOAc 50:1 v/v); light yellow oil ; 59% yield (22.95 mg), >20:1 *dr*, 91% *ee* [Daicel Chiralpak AD-H, hexanes/*i*-propanol = 90/10, flow rate = 1.0 mL/min,  $\lambda = 254.4$  nm,  $t$  (major) = 10.912,  $t$  (minor) = 16.770];  $[\alpha]_{\text{D}}^{25} = -45.76$  (c 0.10,  $\text{CHCl}_3$ );  $^1\text{H}$  NMR (400 MHz,  $\text{CDCl}_3$ )  $\delta$  7.80 (d,  $J = 8.0$  Hz, 1H), 7.58 (d,  $J = 8.2$  Hz, 2H), 7.32 – 7.28 (m, 1H), 7.22 – 7.15 (m, 3H), 7.11 – 7.03 (m, 4H), 6.98 (d,  $J = 7.4$  Hz, 1H), 5.24 – 5.14 (m, 1H), 4.87 (d,  $J = 3.6$  Hz, 1H), 4.83 – 4.76 (m, 2H), 3.62 (dd,  $J = 8.2, 3.6$  Hz, 1H), 2.37 (s, 3H), 2.30 (s, 3H);  $^{13}\text{C}$  NMR (101 MHz,  $\text{CDCl}_3$ )  $\delta$  144.0, 143.4, 142.2, 141.8, 138.4, 134.8, 132.5, 129.5, 128.60, 128.57, 128.5, 127.4, 126.4, 125.7, 124.4, 122.9, 116.0, 115.6, 70.7, 55.8, 21.53, 21.50; IR (KBr)  $\nu_{\max}$ : 2920, 2851, 1597, 1356, 1167, 702, 664  $\text{cm}^{-1}$ ; HRMS (ESI):  $m/z = 412.1343$  (calcd for  $\text{C}_{24}\text{H}_{23}\text{NO}_2\text{S}+\text{Na}^+ = 412.1342$ ).

### (2*R*,3*R*)-2-(3-bromophenyl)-1-tosyl-3-vinylindoline (**3m**)

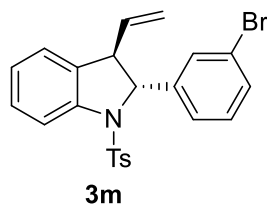

Following *General Procedure B*, the product **3m** was obtained after column chromatography (petroleum ether/EtOAc 50:1 v/v); light yellow oil ; 51% yield (23.10 mg), >20:1 *dr*, 88% *ee* [Daicel Chiralpak AD-H, hexanes/*i*-propanol = 90/10, flow rate = 1.0 mL/min,  $\lambda$  = 254.4 nm, t (major) = 11.875, t (minor) = 17.487];  $[\alpha]_D^{25} = -46.73$  (c 0.10, CHCl<sub>3</sub>); <sup>1</sup>H NMR (400 MHz, CDCl<sub>3</sub>)  $\delta$  7.81 (d, *J* = 8.2 Hz, 1H), 7.58 (d, *J* = 8.0 Hz, 2H), 7.44 – 7.36 (m, 2H), 7.30 (dd, *J* = 15.4, 7.7 Hz, 2H), 7.19 (d, *J* = 7.8 Hz, 3H), 7.07 (t, *J* = 7.4 Hz, 1H), 6.98 (d, *J* = 7.4 Hz, 1H), 5.17 (ddd, *J* = 16.6, 10.0, 8.2 Hz, 1H), 4.88 – 4.75 (m, 3H), 3.59 (dd, *J* = 8.2, 3.9 Hz, 1H), 2.37 (s, 3H); <sup>13</sup>C NMR (101 MHz, CDCl<sub>3</sub>)  $\delta$  144.5, 144.3, 141.6, 137.9, 134.3, 132.0, 130.8, 130.3, 129.6, 128.9, 128.8, 127.4, 125.7, 124.7, 124.6, 122.8, 116.2, 116.0, 70.5, 55.7, 21.6; IR (KBr)  $\nu_{\max}$ : 2959, 2928, 2873, 1724, 1281, 1169, 1121, 1074, 745, 662 cm<sup>-1</sup>; HRMS (ESI): *m/z* = 476.0287 (calcd for C<sub>23</sub>H<sub>20</sub>NO<sub>2</sub>SBr+Na<sup>+</sup> = 476.0291).

### (2*R*,3*R*)-2-(2-bromophenyl)-1-tosyl-3-vinylindoline (**3n**)

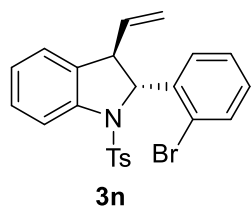

Following *General Procedure B*, the product **3n** was obtained after column chromatography (petroleum ether/EtOAc 50:1 v/v); light yellow oil ; 61% yield (27.63 mg), >20:1 *dr*, 75% *ee* [Daicel Chiralpak AD-H, hexanes/*i*-propanol = 90/10, flow rate = 1.0 mL/min,  $\lambda$  = 254.4 nm, t (major) = 8.505, t (minor) = 15.619];  $[\alpha]_D^{25} = -37.15$  (c 0.10, CHCl<sub>3</sub>); <sup>1</sup>H NMR (400 MHz, CDCl<sub>3</sub>)  $\delta$  7.88 (d, *J* = 8.0 Hz, 1H), 7.70 (d, *J* = 7.8 Hz, 2H), 7.59 (d, *J* = 7.8 Hz, 1H), 7.42 (d, *J* = 7.8 Hz, 1H), 7.35 (t, *J* = 7.6 Hz, 1H), 7.24 (d, *J* = 8.2 Hz, 3H), 7.14 (t, *J* = 7.6 Hz, 1H), 7.09 (t, *J* = 7.4 Hz, 1H), 6.98 (d, *J* = 7.4 Hz, 1H), 5.34 (d, *J* = 18.6 Hz, 2H), 4.67 (dd, *J* = 34.6, 13.4 Hz, 2H), 3.54 (d, *J* = 8.8 Hz, 1H), 2.40 (s, 3H); <sup>13</sup>C NMR (101 MHz, CDCl<sub>3</sub>)  $\delta$  144.2, 141.6, 140.8, 137.6, 134.4, 132.9, 131.8, 129.6, 129.0, 128.7, 128.4, 127.9, 127.8, 127.5, 126.2, 124.7, 116.0, 115.8, 70.3, 54.6, 21.6.; IR (KBr)  $\nu_{\max}$ : 2959, 2929, 2873, 1723, 1475, 1460, 1361, 1278, 1169, 1120, 1073, 745, 662 cm<sup>-1</sup>; 476.0289 (calcd for C<sub>23</sub>H<sub>20</sub>NO<sub>2</sub>SBr+Na<sup>+</sup> = 476.0291).

### (2*R*,3*R*)-2-([1,1'-biphenyl]-4-yl)-1-tosyl-3-vinylindoline (**3o**)

Following *General Procedure B*, the product **3o** was obtained after column chromatography (petroleum ether/EtOAc 50:1 v/v); light yellow oil ; 73% yield (32.92 mg), >20:1 *dr*, 90% *ee*

[Daicel Chiralpak AD-H, hexanes/*i*-propanol = 90/10, flow rate = 1.0 mL/min,  $\lambda$  = 254.4 nm, t (major) = 14.433, t (minor) = 26.772];  $[\alpha]_D^{25} = -48.09$  (c 0.10, CHCl<sub>3</sub>)  $\delta$  7.83 (d,  $J$  = 8.0 Hz, 1H),

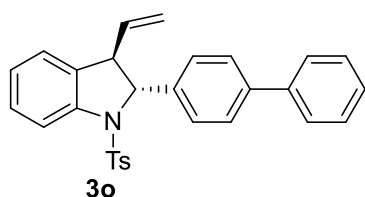

7.61 (d,  $J$  = 8.0 Hz, 2H), 7.58 – 7.51 (m, 4H), 7.41 (t,  $J$  = 8.4 Hz, 4H), 7.33 (q,  $J$  = 7.2 Hz, 2H), 7.19 (d,  $J$  = 8.0 Hz, 2H), 7.08 (t,  $J$  = 7.4 Hz, 1H), 7.02 (d,  $J$  = 7.4 Hz, 1H), 5.29 – 5.17 (m, 1H), 4.97 (d,  $J$  = 3.6 Hz, 1H), 4.89 – 4.78 (m, 2H), 3.69

(dd,  $J$  = 8.2, 3.6 Hz, 1H), 2.37 (s, 3H); <sup>13</sup>C NMR (101 MHz, CDCl<sub>3</sub>)  $\delta$  144.1, 141.8, 141.3, 140.8, 140.7, 138.3, 134.7, 132.4, 129.5, 128.8, 128.7, 127.5, 127.4, 127.3, 127.1, 126.3, 125.8, 124.5, 116.0, 115.8, 70.9, 56.3, 20.7; IR (KBr)  $\nu_{\max}$ : 2961, 2921, 2851, 1457, 1360, 1261, 1091, 806 cm<sup>-1</sup>; HRMS (ESI):  $m/z$  = 474.1489 (calcd for C<sub>29</sub>H<sub>25</sub>NO<sub>2</sub>S+Na<sup>+</sup> = 474.1499).

### (2R,3R)-2-(naphthalen-1-yl)-1-tosyl-3-vinylindoline (3p)

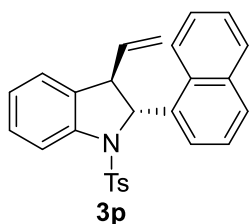

Following *General Procedure B*, the product **3p** was obtained after column chromatography (petroleum ether/EtOAc 50:1 v/v); light yellow oil ; 65% yield (29.32 mg), >20:1 *dr*, 75% *ee* [Daicel Chiralpak AD-H, hexanes/*i*-propanol = 90/10, flow rate = 1.0 mL/min,  $\lambda$  = 254.4 nm, t

(major) = 27.343, t (minor) = 16.267];  $[\alpha]_D^{25} = 26.14$  (c 0.10, CHCl<sub>3</sub>); <sup>1</sup>H NMR (400 MHz, CDCl<sub>3</sub>)  $\delta$  7.93 (t,  $J$  = 8.8 Hz, 3H), 7.76 (d,  $J$  = 8.2 Hz, 1H), 7.65 (dd,  $J$  = 15.6, 7.4 Hz, 3H), 7.56 – 7.47 (m, 2H), 7.37 (dt,  $J$  = 19.8, 7.8 Hz, 2H), 7.24 (d,  $J$  = 7.6 Hz, 2H), 7.06 (t,  $J$  = 7.4 Hz, 1H), 6.92 (d,  $J$  = 7.4 Hz, 1H), 5.70 (s, 1H), 5.13 (dt,  $J$  = 18.2, 9.4 Hz, 1H), 4.96 – 4.77 (m, 2H), 3.61 (d,  $J$  = 9.0 Hz, 1H), 2.40 (s, 3H); <sup>13</sup>C NMR (101 MHz, CDCl<sub>3</sub>)  $\delta$  141.6, 138.5, 137.2, 135.0, 134.2, 132.8, 129.8, 129.6, 129.2, 128.7, 128.1, 127.4, 126.1, 126.0, 125.7, 125.6, 124.8, 123.4, 116.3, 116.0, 55.4, 29.7, 21.6; IR (KBr)  $\nu_{\max}$ : 2960, 2920, 2851, 1463, 1261, 1170, 1093, 802 cm<sup>-1</sup>; HRMS (ESI):  $m/z$  = 448.1349 (calcd for C<sub>27</sub>H<sub>23</sub>NO<sub>2</sub>S+Na<sup>+</sup> = 448.1342).

### (2R,3R)-2-(thiophen-2-yl)-1-tosyl-3-vinylindoline (3q)

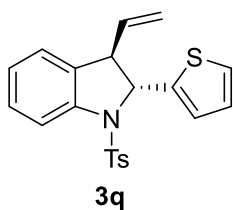

Following *General Procedure B*, the product **3q** was obtained after column chromatography (petroleum ether/EtOAc 50:1 v/v); light yellow oil ; 55% yield (20.98 mg), >20:1 *dr*, 76% *ee* [Daicel Chiralpak AD-H, hexanes/*i*-propanol = 90/10, flow rate = 1.0 mL/min,  $\lambda$  = 254.4 nm, t

(major) = 15.617, t (minor) = 33.683];  $[\alpha]_D^{25} = -60.04$  (c 0.10, CHCl<sub>3</sub>); <sup>1</sup>H NMR (400 MHz,

CDCl<sub>3</sub>)  $\delta$  7.65 (d,  $J$  = 8.2 Hz, 1H), 7.50 (d,  $J$  = 8.4 Hz, 2H), 7.25 – 7.19 (m, 1H), 7.13 – 7.07 (m, 3H), 7.02 – 6.94 (m, 3H), 6.85 (dd,  $J$  = 5.0, 3.4 Hz, 1H), 5.15 – 5.02 (m, 2H), 4.75 – 4.68 (m, 2H), 3.71 (dd,  $J$  = 8.0, 3.0 Hz, 1H), 2.29 (s, 3H). <sup>13</sup>C NMR (101 MHz, CDCl<sub>3</sub>)  $\delta$  144.4, 143.0, 139.9, 136.6, 133.8, 131.3, 128.5, 127.7, 126.4, 125.7, 124.7, 123.73, 123.68, 123.6, 115.4, 115.0, 66.2, 55.5, 20.5; IR (KBr)  $\nu_{\text{max}}$ : 1723, 1461, 1358, 1288, 1013 cm<sup>-1</sup>; HRMS (ESI):  $m/z$  = 404.0764 (calcd for C<sub>21</sub>H<sub>19</sub>NO<sub>2</sub>S<sub>2</sub>+Na<sup>+</sup> = 404.0749).

### (2*R*,3*R*)-2-(furan-2-yl)-1-tosyl-3-vinylindoline (**3r**)

Following *General Procedure B*, the product **3r** was obtained after column chromatography (petroleum ether/EtOAc 50:1 v/v); light yellow oil; 54% yield (19.73 mg), >20:1 *dr*, 72% *ee*

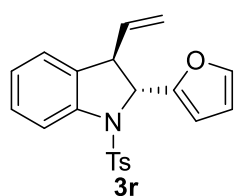

[Daicel Chiralpak AD-H, hexanes/*i*-propanol = 90/10, flow rate = 1.0 mL/min,  $\lambda$  = 254.4 nm,  $t$  (major) = 10.949,  $t$  (minor) = 18.357];  $[\alpha]_{\text{D}}^{25}$  = -83.38 (c 0.10, CHCl<sub>3</sub>); <sup>1</sup>H NMR (400 MHz, CDCl<sub>3</sub>)  $\delta$  7.72 (d,  $J$  = 8.2 Hz, 1H), 7.59 (d,  $J$  = 8.4 Hz, 2H), 7.35 – 7.28 (m, 2H), 7.20 (d,  $J$  = 8.0 Hz,

2H), 7.07 (qd,  $J$  = 7.4, 1.4 Hz, 2H), 6.42 (d,  $J$  = 3.2 Hz, 1H), 6.34 (dd,  $J$  = 3.2, 1.8 Hz, 1H), 5.21 (ddd,  $J$  = 17.4, 9.8, 8.0 Hz, 1H), 5.03 (d,  $J$  = 3.4 Hz, 1H), 4.85 – 4.79 (m, 2H), 3.91 (dd,  $J$  = 8.0, 3.4 Hz, 1H), 2.38 (s, 3H). <sup>13</sup>C NMR (101 MHz, CDCl<sub>3</sub>)  $\delta$  153.2, 144.0, 142.4, 141.1, 137.6, 134.8, 132.4, 130.9, 129.5, 128.5, 127.4, 125.6, 124.4, 116.1, 111.9, 107.7, 65.0, 51.3, 21.1. IR (KBr)  $\nu_{\text{max}}$ : 1723, 1460, 1358, 1288, 1188 cm<sup>-1</sup>; HRMS (ESI):  $m/z$  = 388.0953 (calcd for C<sub>21</sub>H<sub>19</sub>NO<sub>3</sub>S+Na<sup>+</sup> = 388.0978).

### (2*R*,3*R*)-6-fluoro-2-phenyl-1-tosyl-3-vinylindoline (**3s**)

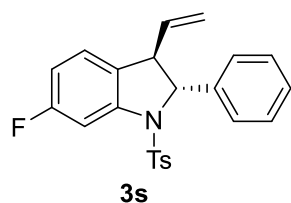

Following *General Procedure B*, the product **3s** was obtained after column chromatography (petroleum ether/EtOAc 50:1 v/v); light yellow oil ; 75% yield (29.48 mg), >20:1 *dr*, 90% *ee* [Daicel Chiralpak AD-H, hexanes/*i*-propanol = 90/10, flow rate = 1.0 mL/min,

$\lambda$  = 254.4 nm,  $t$  (major) = 13.767,  $t$  (minor) = 22.474];  $[\alpha]_{\text{D}}^{25}$  = -45.36 (c 0.10, CHCl<sub>3</sub>); <sup>1</sup>H NMR (400 MHz, CDCl<sub>3</sub>)  $\delta$  7.62 (d,  $J$  = 8.2 Hz, 2H), 7.55 (dd,  $J$  = 9.8, 2.4 Hz, 1H), 7.32 (d,  $J$  = 5.0 Hz, 5H), 7.24 (d,  $J$  = 8.0 Hz, 2H), 6.94 (dd,  $J$  = 8.2, 5.6 Hz, 1H), 6.77 (td,  $J$  = 8.4, 2.4 Hz, 1H), 5.25 (ddd,  $J$  = 17.0, 10.0, 8.2 Hz, 1H), 4.95 (d,  $J$  = 3.8 Hz, 1H), 4.89 – 4.76 (m, 2H), 3.62 (dd,  $J$  = 8.2, 3.6 Hz, 1H), 2.41 (s, 3H); <sup>13</sup>C NMR (101 MHz, CDCl<sub>3</sub>)  $\delta$  162.2 (d,  $J_{\text{C-F}}$  = 241.4 Hz), 143.3, 142.1

(d,  $J_{C-F} = 13.4$  Hz), 140.86, 137.03, 133.54, 128.59, 127.73, 126.75 (d,  $J_{C-F} = 15.4$  Hz), 126.36, 125.4 (d,  $J_{C-F} = 9.8$  Hz), 124.78, 114.95, 110.1 (d,  $J_{C-F} = 23.74$  Hz), 102.92, 102.64, 71.04, 54.07, 20.52.;  $^{19}\text{F}$  NMR (376 MHz,  $\text{CDCl}_3$ )  $\delta$  -112.60; IR (KBr)  $\nu_{\text{max}}$ : 2959, 2921, 2851, 1729, 1350, 1092, 811, 662  $\text{cm}^{-1}$ ; HRMS (ESI):  $m/z = 416.1091$  (calcd for  $\text{C}_{23}\text{H}_{20}\text{NO}_2\text{SF}+\text{Na}^+ = 416.1091$ ).

**(2*R*,3*R*)-6-bromo-2-phenyl-1-tosyl-3-vinylindoline (3t)**

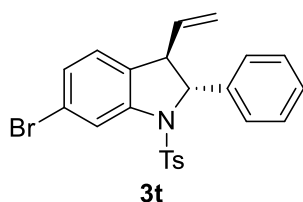

Following *General Procedure B*, the product **3t** was obtained after column chromatography (petroleum ether/EtOAc 50:1 v/v); light yellow oil ; 73% yield (33.07 mg), >20:1 *dr*, 89% *ee* [Daicel Chiralpak AD-H, hexanes/*i*-propanol = 90/10, flow rate = 1.0

mL/min,  $\lambda = 254.4$  nm,  $t$  (major) = 11.219,  $t$  (minor) = 20.702];  $[\alpha]_{\text{D}}^{25} = -44.27$  (c 0.10,  $\text{CHCl}_3$ );  $^1\text{H}$  NMR (400 MHz,  $\text{CDCl}_3$ )  $\delta$  7.95 (d,  $J = 1.8$  Hz, 1H), 7.59 (dd,  $J = 8.4, 2.2$  Hz, 2H), 7.34 – 7.27 (m, 5H), 7.22 (d,  $J = 8.2$  Hz, 2H), 7.18 (dd,  $J = 8.0, 1.8$  Hz, 1H), 6.85 (d,  $J = 8.0$  Hz, 1H), 5.26 – 5.15 (m, 1H), 4.91 (d,  $J = 3.6$  Hz, 1H), 4.85 – 4.74 (m, 2H), 3.58 (dd,  $J = 8.0, 3.6$  Hz, 1H), 2.39 (s, 3H);  $^{13}\text{C}$  NMR (101 MHz,  $\text{CDCl}_3$ )  $\delta$  144.4, 143.1, 141.8, 137.7, 134.7, 131.4, 129.7, 128.8, 127.9, 127.42, 127.36, 126.9, 125.8, 122.2, 118.9, 116.2, 71.6, 55.3, 21.6; IR (KBr)  $\nu_{\text{max}}$ : 2962, 2926, 2854, 1729, 1362, 1097, 1030, 811  $\text{cm}^{-1}$ ; HRMS (ESI):  $m/z = 476.0292$  (calcd for  $\text{C}_{23}\text{H}_{20}\text{NO}_2\text{SBr}+\text{Na}^+ = 476.0291$ ).

**(2*R*,3*R*)-5-methyl-2-phenyl-1-tosyl-3-vinylindoline (3u)**

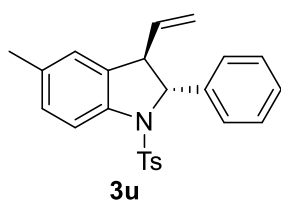

Following *General Procedure B*, the product **3u** was obtained after column chromatography (petroleum ether/EtOAc 50:1 v/v); light yellow oil ; 71% yield (27.62 mg), >20:1 *dr*, 90% *ee* [Daicel Chiralpak AD-H, hexanes/*i*-propanol = 90/10, flow rate = 1.0 mL/min,  $\lambda = 254.4$

nm,  $t$  (major) = 13.135,  $t$  (minor) = 17.148];  $[\alpha]_{\text{D}}^{25} = -47.65$  (c 0.10,  $\text{CHCl}_3$ );  $^1\text{H}$  NMR (400 MHz,  $\text{CDCl}_3$ )  $\delta$  7.68 (d,  $J = 8.2$  Hz, 1H), 7.65 – 7.61 (m, 1H), 7.59 (d,  $J = 7.8$  Hz, 2H), 7.31 (d,  $J = 6.0$  Hz, 4H), 7.19 (d,  $J = 8.0$  Hz, 2H), 7.08 (d,  $J = 5.4$  Hz, 1H), 6.78 (s, 1H), 5.10 (dd,  $J = 17.2, 8.6$  Hz, 1H), 4.87 (d,  $J = 3.6$  Hz, 1H), 4.84 – 4.75 (m, 2H), 3.57 (dd,  $J = 8.2, 3.6$  Hz, 1H), 2.37 (s, 3H), 2.28 (s, 3H);  $^{13}\text{C}$  NMR (101 MHz,  $\text{CDCl}_3$ )  $\delta$  143.9, 143.0, 142.4, 134.3, 132.6, 129.5, 129.3, 129.0, 128.7, 128.4, 127.6, 127.5, 125.8, 125.4, 115.9, 115.5, 69.7, 53.0, 21.5, 21.0; IR (KBr)  $\nu_{\text{max}}$ : 2963, 2924, 2872, 2852, 1476, 1460, 1168, 1091, 662  $\text{cm}^{-1}$ ; HRMS (ESI):  $m/z = 412.1340$  (calcd

for  $C_{24}H_{23}NO_2S+Na^+ = 412.1342$ ).

**(2R,3R)-5-chloro-2-phenyl-1-tosyl-3-vinylindoline (3v)**

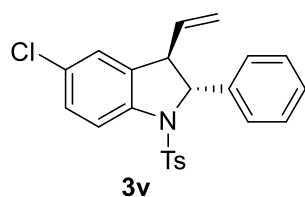

Following *General Procedure B*, the product **3v** was obtained after column chromatography (petroleum ether/EtOAc 50:1 v/v); light yellow oil; 70% yield (28.63 mg), >20:1 *dr*, 92% *ee* [Daicel Chiralpak AD-H, hexanes/*i*-propanol = 90/10, flow rate = 1.0

mL/min,  $\lambda = 254.4$  nm,  $t$  (major) = 10.283,  $t$  (minor) = 20.834];  $[\alpha]_D^{25} = -48.79$  (c 0.10,  $CHCl_3$ );  $^1H$  NMR (400 MHz,  $CDCl_3$ )  $\delta$  7.73 (dd,  $J = 8.6, 2.0$  Hz, 1H), 7.58 (dd,  $J = 8.2, 2.2$  Hz, 2H), 7.36 – 7.26 (m, 6H), 7.22 (dd,  $J = 8.4, 2.1$  Hz, 2H), 6.96 (s, 1H), 5.21 – 5.09 (m, 1H), 4.92 – 4.87 (m, 1H), 4.87 – 4.76 (m, 2H), 3.60 (d,  $J = 7.6$  Hz, 1H), 2.39 (s, 3H);  $^{13}C$  NMR (101 MHz,  $CDCl_3$ )  $\delta$  144.3, 141.8, 140.5, 137.5, 134.4, 129.7, 129.6, 128.8, 128.7, 127.9, 127.4, 125.9, 125.8, 117.0, 116.4, 71.5, 54.7, 21.6; IR (KBr)  $\nu_{max}$ : 2958, 2921, 2851, 1724, 1597, 1475, 1460, 1357, 1167, 1004, 705  $cm^{-1}$ ; HRMS (ESI):  $m/z = 432.0792$  (calcd for  $C_{23}H_{20}ClNO_2S+Na^+ = 432.0796$ ).

**(2R,3R)-4-methyl-2-phenyl-1-tosyl-3-vinylindoline (3w)**

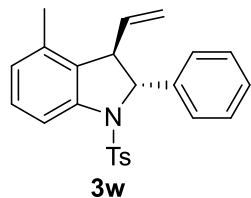

Following *General Procedure B*, the product **3w** was obtained after column chromatography (petroleum ether/EtOAc 50:1 v/v); light yellow oil ; 64% yield (25.29 mg), >20:1 *dr*, 70% *ee* [Daicel Chiralpak AD-H, hexanes/*i*-propanol = 90/10, flow rate = 1.0 mL/min,  $\lambda = 254.4$  nm,  $t$

(major) = 13.874,  $t$  (minor) = 16.110];  $[\alpha]_D^{25} = -40.08$  (c 0.10,  $CHCl_3$ );  $^1H$  NMR (400 MHz,  $CDCl_3$ )  $\delta$  7.66 (ddd,  $J = 11.4, 7.4, 4.4$  Hz, 3H), 7.35 – 7.15 (m, 8H), 6.88 (dd,  $J = 7.4, 4.4$  Hz, 1H), 5.09 (ddt,  $J = 17.2, 8.4, 4.2$  Hz, 1H), 5.04 – 4.98 (m, 1H), 4.83 – 4.64 (m, 2H), 3.66 – 3.56 (m, 1H), 2.39 (s, 3H), 2.07 (s, 3H);  $^{13}C$  NMR (101 MHz,  $CDCl_3$ )  $\delta$  143.9, 142.4, 140.8, 137.2, 136.0, 135.3, 130.4, 129.5, 128.7, 127.7, 127.3, 126.1, 125.6, 115.2, 113.1, 69.1, 53.7, 21.5, 18.1; IR (KBr)  $\nu_{max}$ : 2956, 2921, 2850, 1476, 1460, 1353, 1167, 1091, 758, 702, 664  $cm^{-1}$ ; HRMS (ESI):  $m/z = 412.1350$  (calcd for  $C_{24}H_{23}NO_2S+Na^+ = 412.1342$ ).

**(2R,3R)-4-chloro-2-phenyl-1-tosyl-3-vinylindoline (3x)**

Following *General Procedure B*, the product **3x** was obtained after column chromatography (petroleum ether/EtOAc 50:1 v/v); light yellow oil ; 61% yield (24.95 mg), >20:1 *dr*, 60% *ee* [Daicel Chiralpak AD-H, hexanes/*i*-propanol = 90/10, flow rate = 1.0 mL/min,  $\lambda = 254.4$  nm,  $t$

(major) = 9.565, t (minor) = 12.434];  $[\alpha]_D^{25} = -38.65$  (c 0.10,  $\text{CHCl}_3$ );  $^1\text{H NMR}$  (400 MHz,  $\text{CDCl}_3$ )  $\delta$  7.73 (d,  $J = 8.0$  Hz, 1H), 7.63 (d,  $J = 8.0$  Hz, 2H), 7.47 – 7.41 (m, 1H), 7.35 – 7.29 (m, 5H), 7.23 (d,  $J = 8.0$  Hz, 2H), 7.05 (d,  $J = 8.0$  Hz, 1H), 5.15 (ddd,  $J = 17.4, 10.0, 7.8$  Hz, 1H), 5.07 (d,  $J = 2.2$  Hz, 1H), 4.87 – 4.74 (m, 2H), 3.79 – 3.73 (m, 1H), 2.40 (s, 3H);  $^{13}\text{C NMR}$  (101 MHz,  $\text{CDCl}_3$ )  $\delta$  144.3, 143.4, 143.1, 141.6, 135.8, 135.1, 131.9, 130.1, 129.6, 128.8, 127.9, 127.3, 125.6, 125.0, 116.4, 114.2, 71.1, 54.4, 21.6; IR (KBr)  $\nu_{\text{max}}$ : 2957, 2920, 2850, 1648, 1449, 1260, 1187, 1091, 803, 697, 662  $\text{cm}^{-1}$ ; HRMS (ESI):  $m/z = 432.0799$  (calcd for  $\text{C}_{23}\text{H}_{20}\text{NO}_2\text{Scl} + \text{Na}^+ = 432.0796$ ).

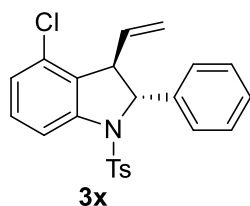

## 6. Scale-up synthesis and further transformations

### 6.1 Gram scale synthesis of 3a

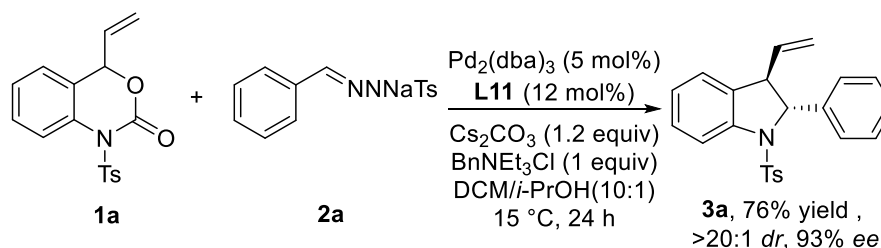

To a flame-dried schlenk tube,  $\text{Pd}_2(\text{dba})_3$  (138 mg, 0.15 mmol, 5 mol%), (*R, R*)-**L11** (258 mg, 0.36 mmol) and dry DCM (30 mL) were added under nitrogen atmosphere. The mixture was stirred at 25 °C for 0.5 hour to produce a dark red solution and then *i*-PrOH (3 mL) was added. After that, vinyl benzoxazinone **1** (3.0 mmol, 0.99 g), *N*-tosylhydrazone sodium salt **2** (3.6 mmol, 1.07 g),  $\text{Cs}_2\text{CO}_3$  (3.6 mmol, 1.17 g),  $\text{BnNEt}_3\text{Cl}$  (3 mmol, 675 mg) were added. The mixture was stirred at 15 °C for 24 hours (monitored by TLC analysis) and then it was subjected to silica gel column to afford the desired products **3a** in 76% yield with >20: *dr* and 93% *ee*.

### 6.2 Further transformation of the products

Hydrogenation reaction: To a flame dried schlenk tube, Pd/C (0.4 mmol, wt 10%) and **3a** (0.20 mmol) were added, then Methanol (2 mL) was added. The mixture was replaced with  $\text{N}_2$  for three times, then inserted with a  $\text{H}_2$  balloon. The reaction mixture was stirred at 30 °C under  $\text{H}_2$  atmosphere for 24 hours. The reaction mixture was filtered and the filtrate was concentrated and purified by column chromatography on silica gel to afforded product **4a** in 71% yield with >20:1

*dr* and 93% *ee*.

Suzuki-coupling reaction: To a flame dried schlenk tube, **3i** (0.45 mmol), 4-Methoxyphenylboronic acid (0.9 mmol) and Na<sub>2</sub>CO<sub>3</sub> (0.95 mmol) were added and then 2 mL of mixed solvents (toluene/EtOH/H<sub>2</sub>O = 7:1.5:1.7, v/v/v) was added. The reaction mixture was stirred at 90 °C for 24 hours. The reaction mixture was allowed to cool to room temperature and 20 mL of water was added. The mixture was extracted with ethyl acetate. The organic phase was concentrated and purified by column chromatography on silica gel to afford product **4b** in 81% yield, with >20:1 *dr* and 90% *ee*.

Dihydroxylation reaction: To a three necked flask, **3i** (0.2 mmol) was added and then 3.5 mL acetone and 0.5 mL H<sub>2</sub>O was added, then K<sub>2</sub>OsO<sub>4</sub>·2H<sub>2</sub>O (0.02 mmol) was added, after that NMO (0.4 mmol) was added by portions. Stir at room temperature overnight. Add 5 mL of sat. NaHCO<sub>3</sub> solution and stir for half an hour. Concentrate to remove acetone, add ethyl acetate and allow to stand, collect organic phase and concentrate to obtained the **4c** in 85% yield with 5:1 *dr* and 90% *ee* for the major diastereomer.

#### (2*R*, 3*R*)-3-ethyl-2-phenyl-1-tosylindoline (**4a**)

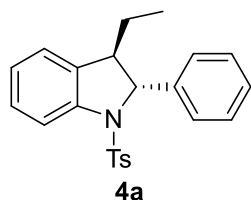

Following *General Procedure C*, the product **4a** was obtained after column chromatography (petroleum ether/EtOAc 50:1 v/v); light yellow oil; 71% yield (26.80 mg), >20:1 *dr*, 93% *ee* [Daicel Chiralpak AD-H, hexanes/*i*-propanol = 90/10, flow rate = 1.0 mL/min,  $\lambda$  = 254.4 nm, t (major) = 13.478, t (minor) = 25.975]; [ $\alpha$ ]<sub>D</sub><sup>25</sup> = -24.34 (c 0.10, CHCl<sub>3</sub>); <sup>1</sup>H NMR (400 MHz, CDCl<sub>3</sub>)  $\delta$  7.68 (d, *J* = 8.0 Hz, 1H), 7.52 (d, *J* = 8.2 Hz, 2H), 7.21 – 7.13 (m, 6H), 7.10 (d, *J* = 8.0 Hz, 2H), 6.96 (d, *J* = 3.4 Hz, 2H), 4.85 (d, *J* = 2.6 Hz, 1H), 2.84 (ddd, *J* = 8.4, 5.4, 2.6 Hz, 1H), 2.27 (s, 3H), 1.18 (s, 2H), 0.78 – 0.71 (m, 3H).; <sup>13</sup>C NMR (101 MHz, CDCl<sub>3</sub>)  $\delta$  143.9, 142.9, 141.5, 135.4, 134.7, 129.5, 128.7, 128.2, 127.5, 127.1, 126.2, 125.0, 124.1, 115.6, 69.9, 53.0, 29.5, 21.5, 11.2; IR (KBr)  $\nu_{\text{max}}$ : 2963, 2927, 1724, 1460, 1165, 926, 812, 660, 574, 537 cm<sup>-1</sup>; HRMS (ESI): *m/z* = 400.1311 (calcd for C<sub>23</sub>H<sub>23</sub>NO<sub>2</sub>S+Na<sup>+</sup> = 390.1342).

#### (2*R*, 3*R*)-2-(4'-methoxy-[1,1'-biphenyl]-4-yl)-1-tosyl-3-vinylindoline (**4b**)

Following *General Procedure D*, the product **4b** was obtained after column chromatography (petroleum ether/EtOAc 50:1 v/v); light yellow oil; 81% yield (39.01 mg), >20:1 *dr*, 90% *ee*



[Daicel Chiralpak AD-H, hexanes/*i*-propanol = 85/15, flow rate = 1.0 mL/min,  $\lambda$  = 254.4 nm, t (major) = 19.576, t (minor) = 30.161];  $[\alpha]_D^{25} = -26.67$  (c 0.10, CHCl<sub>3</sub>); <sup>1</sup>H NMR (400 MHz, CDCl<sub>3</sub>)  $\delta$  7.73 (d,  $J$  = 8.0 Hz, 1H), 7.52 (d,  $J$  = 7.8 Hz,

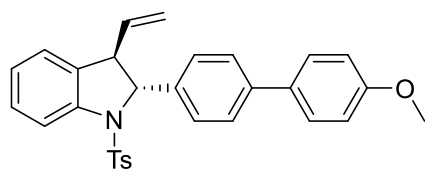

**4b**

2H), 7.40 (dd,  $J$  = 8.2, 4.0 Hz, 4H), 7.28 (d,  $J$  = 7.8 Hz, 2H), 7.23 (t,  $J$  = 7.6 Hz, 1H), 7.10 (d,  $J$  = 7.8 Hz, 2H), 6.99 (t,  $J$  = 7.4 Hz, 1H), 6.93 (d,  $J$  = 7.4 Hz, 1H), 6.88 (d,

$J$  = 8.2 Hz, 2H), 5.13 (dt,  $J$  = 17.6, 8.8 Hz, 1H), 4.87 (d,  $J$  = 3.6 Hz, 1H), 4.79 – 4.68 (m, 2H), 3.76 (s, 3H), 3.63 – 3.55 (m, 1H), 2.28 (s, 3H); <sup>13</sup>C NMR (101 MHz, CDCl<sub>3</sub>)  $\delta$  159.2, 144.0, 141.8, 140.7, 139.9, 138.3, 134.8, 133.4, 132.5, 129.5, 128.6, 128.1, 127.4, 127.0, 126.3, 125.7, 124.5, 116.0, 115.8, 114.2, 71.0, 55.8, 55.4, 21.5.; IR (KBr)  $\nu_{\max}$ : 2959, 2921, 2852, 1651, 1595, 1448, 1345, 1052, 696, 660, 575, 542 cm<sup>-1</sup>; HRMS (ESI):  $m/z$  = 504.1615 (calcd for C<sub>30</sub>H<sub>27</sub>NO<sub>3</sub>S+Na<sup>+</sup> = 504.1604).

#### 1-((2*R*,3*R*)-2-(4-bromophenyl)-1-tosylindolin-3-yl)ethane-1,2-diol (**4c**)

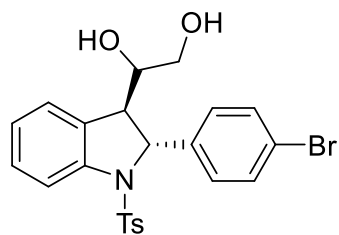

**4c**

Following *General Procedure E*, the product **4c** was obtained after column chromatography (petroleum ether/EtOAc 50:1 v/v); light yellow oil; 85% yield (41.51 mg), 5:1 *dr*, 90% *ee* [Daicel Chiralpak AS-H, hexanes/*i*-propanol = 82/18, flow rate = 1.0 mL/min,  $\lambda$  = 254.4 nm, t (major) = 30.969, t (minor) = 36.800];

$[\alpha]_D^{25} = -15.67$  (c 0.10, CHCl<sub>3</sub>); <sup>1</sup>H NMR (400 MHz, CDCl<sub>3</sub>)  $\delta$  7.68 (d,  $J$  = 8.0 Hz, 1H), 7.59 (d,  $J$  = 8.0 Hz, 2H), 7.31 (d,  $J$  = 8.2 Hz, 2H), 7.24 (t,  $J$  = 7.2 Hz, 1H), 7.12 (t,  $J$  = 7.8 Hz, 4H), 6.99 (d,  $J$  = 10.6 Hz, 2H), 5.39 (s, 1H), 5.28 (d,  $J$  = 5.2 Hz, 1H), 3.51 – 3.46 (m, 1H), 3.02 (d,  $J$  = 7.6 Hz, 1H), 2.80 (d,  $J$  = 9.2 Hz, 1H), 2.30 (s, 3H); <sup>13</sup>C NMR (101 MHz, CDCl<sub>3</sub>)  $\delta$  143.2, 141.2, 140.6, 134.4, 130.7, 128.5, 128.1, 126.7, 126.2, 125.2, 123.2, 120.4, 114.6, 72.0, 65.3, 61.4, 53.0, 20.5.; IR (KBr)  $\nu_{\max}$ : 2962, 2921, 2851, 1260, 1091, 1025, 799, 666, 569 cm<sup>-1</sup>; HRMS (ESI):  $m/z$  = 510.0368 (calcd for C<sub>23</sub>H<sub>22</sub>BrNO<sub>4</sub>S+Na<sup>+</sup> = 510.0345).

## 7. DYKAT Studies

Five experiments were performed at the same time and respectively quenched at 3.0 hours, 6.0 hours, 9.0 hours, 12.0 hours and 24.0 hours. To five flame-dried schlenk tube, Pd<sub>2</sub>(dba)<sub>3</sub> (4.6 mg,

0.005 mmol) and (*R,R*)-**L11** (8.6 mg, 0.012 mmol) were respectively added in dry DCM (1 mL) under nitrogen atmosphere. The mixture was stirred at 25 °C for 0.5 hours. Then *i*-PrOH (100 μL) was added into the resulted dark red solution. After that, vinyl benzoxazinone **1a** (0.1 mmol), *N*-tosylhydrazone sodium salt **2a** (0.12 mmol), Cs<sub>2</sub>CO<sub>3</sub> (0.12 mmol, 39.10mg), BnNEt<sub>3</sub>Cl (0.1 mmol, 22.50mg) were included. The mixture was stirred at 15 °C. The reasubstrate **1a** was recovered at different times and analyzed by HPLC (CHIRALPAK AD-H column, hexane/*i*-PrOH=85/15, 254nm, 1 mL/min). And the product **3a** was analyzed by HPLC (CHIRALPAK AD-H column, hexane/*i*-PrOH=90/10, 254nm, 1 mL/min) at different times.

**Table S7.** Test results of DYKAT studies

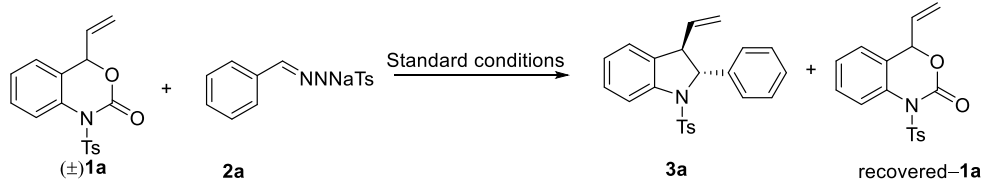

| Time (h) | Recovered yield of <b>1a</b> | ee of recovered <b>1a</b> <sup>a</sup> (%) | Conv. of <b>1a</b> % | <i>dr</i> of <b>3a</b> (%) | <i>ee</i> of <b>3a</b> <sup>b</sup> (%) |
|----------|------------------------------|--------------------------------------------|----------------------|----------------------------|-----------------------------------------|
| 3        | 85                           | 0                                          | 11                   | >20:1                      | 91                                      |
| 6        | 74                           | 0                                          | 22                   | >20:1                      | 91                                      |
| 9        | 66                           | 0                                          | 30                   | >20:1                      | 91                                      |
| 12       | 43                           | 0                                          | 55                   | >20:1                      | 91                                      |
| 24       | 17                           | 0                                          | 80                   | >20:1                      | 91                                      |

<sup>a</sup>Determined by HPLC analysis CHIRALPAK AD-H column, hexane/*i*-PrOH=85/15, 254nm, 1 mL/min). <sup>b</sup>Determined by HPLC analysis CHIRALPAK AD-H column, hexane/*i*-PrOH=90/10, 254nm, 1 mL/min).

## 8. The study of the non-linear effect

To a flame-dried schlenk tube, Pd<sub>2</sub>dba<sub>3</sub> (4.6 mg, 0.005 mmol), (*R,R*)-**L10** (x mg) / *ent*-**L10** (y mg) and dry DCM (1 mL) were added under a nitrogen atmosphere. The mixture was stirred at 25 °C for 0.5 hour to produce a dark red solution and then *i*-PrOH (100 μL) was added. After that, vinyl benzoxazinone **1** (0.1 mmol), *N*-tosylhydrazone sodium salt **2** (0.12 mmol), Cs<sub>2</sub>CO<sub>3</sub> (0.12 mmol, 39.10mg), BnNEt<sub>3</sub>Cl (0.1 mmol, 22.50mg) were added. The mixture was stirred at 15 °C for 24 hours (monitored by TLC analysis) and then it was subjected to silica gel column to afford the desired products **3**.

**Table S8.** The study of the non-linear effect <sup>[a]</sup>

| entry | x/y (mg)  | ee (%) (L10 + ent-L10) | yield <sup>[b]</sup> | dr <sup>[c]</sup> | ee (%) <sup>[d]</sup> of 3a |
|-------|-----------|------------------------|----------------------|-------------------|-----------------------------|
| 1     | 2.35/1.60 | 20                     | 68                   | >20:1             | 18                          |
| 2     | 2.75/1.18 | 40                     | 67                   | >20:1             | 37                          |
| 3     | 3.14/0.79 | 60                     | 69                   | >20:1             | 53                          |
| 4     | 3.53/0.40 | 80                     | 72                   | >20:1             | 68                          |
| 5     | 3.93/0    | 100                    | 71                   | >20:1             | 84                          |

<sup>[a]</sup>Reaction conditions: **1a** (0.05 mmol), **2a** (0.06 mmol), Pd<sub>2</sub>(dba)<sub>3</sub> (5 mol%), ligand (12 mol%), Cs<sub>2</sub>CO<sub>3</sub> (0.06 mmol), BnNEt<sub>3</sub>Cl (0.05 mmol), 0.5 mL of dichloromethane/*i*-PrOH(10:1) at 15°C for 24 hours. <sup>[b]</sup> Isolated yield. <sup>[c]</sup> Determined by <sup>1</sup>H NMR analysis. <sup>[d]</sup> Determined by chiral HPLC.

## 9. The X-ray data of 3s

**Table S9.** Crystal data and structure refinement for **3s**.

|                                 |                                                                                                                            |
|---------------------------------|----------------------------------------------------------------------------------------------------------------------------|
| Identification code             | mo_b20220719bb_0m                                                                                                          |
| Empirical formula               | C <sub>23</sub> H <sub>20</sub> FNO <sub>2</sub> S                                                                         |
| Formula weight                  | 393.46                                                                                                                     |
| Temperature                     | 120(2) K                                                                                                                   |
| Wavelength                      | 0.71073 Å                                                                                                                  |
| Crystal system, space group     | Monoclinic, P 21                                                                                                           |
| Unit cell dimensions            | a = 11.2213(4) Å    alpha = 90 deg.<br>b = 10.9116(3) Å    beta = 101.3400(10) deg.<br>c = 16.2561(5) Å    gamma = 90 deg. |
| Volume                          | 1951.58(11) Å <sup>3</sup>                                                                                                 |
| Z, Calculated density           | 4, 1.339 Mg/m <sup>3</sup>                                                                                                 |
| Absorption coefficient          | 0.194 mm <sup>-1</sup>                                                                                                     |
| F (000)                         | 824                                                                                                                        |
| Crystal size                    | 0.100 x 0.050 x 0.030 mm                                                                                                   |
| Theta range for data collection | 2.262 to 24.982 deg.                                                                                                       |
| Limiting indices                | -13<=h<=13, -12<=k<=12, -19<=l<=19                                                                                         |

|                                   |                                             |
|-----------------------------------|---------------------------------------------|
| Reflections collected / unique    | 31994 / 6875 [R(int) = 0.0972]              |
| Completeness to theta = 24.982    | 99.9 %                                      |
| Refinement method                 | Full-matrix least-squares on F <sup>2</sup> |
| Data / restraints / parameters    | 6875 / 1 / 507                              |
| Goodness-of-fit on F <sup>2</sup> | 1.039                                       |
| Final R indices [I>2sigma(I)]     | R1 = 0.0496, wR2 = 0.1160                   |
| R indices (all data)              | R1 = 0.0611, wR2 = 0.1252                   |
| Absolute structure parameter      | -0.06(8)                                    |
| Extinction coefficient            | n/a                                         |
| Largest diff. peak and hole       | 0.233 and -0.431 e.A <sup>-3</sup>          |

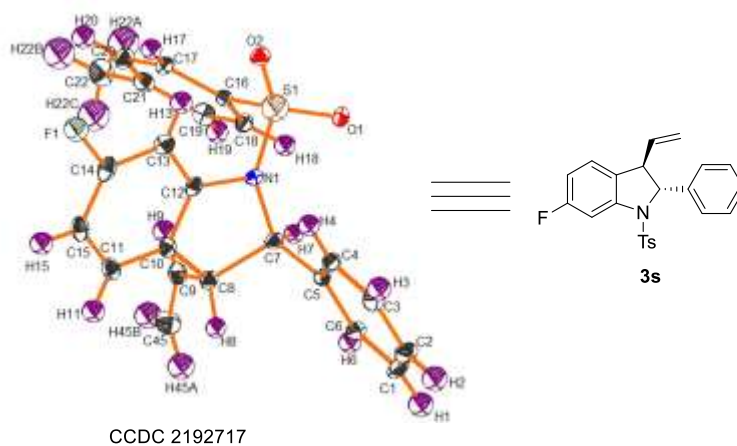

**Figure S3.** ORTEP drawing of **3s** (30% thermal ellipsoids)

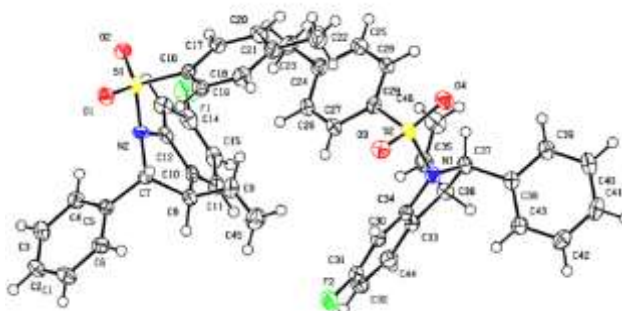

**Figure S4.** Packing of molecules in a unit cell of **3s**

The crystal was obtained through vapor diffusion with pentanes/CH<sub>2</sub>Cl<sub>2</sub> at -20 °C. It should be noted that **3s** crystallizes in monoclinic space group P 1 21 1, which contains two molecules in the asymmetric unit. CCDC of **3s** is 2192717, which can be obtained free of charge from The Cambridge Crystallographic Data Centre via [www.ccdc.cam.ac.uk/data\\_request/cif](http://www.ccdc.cam.ac.uk/data_request/cif).

## 10. NMR spectra

### $N^1$ -(*(1R,2R)*-2-(2-(bis(3,5-dimethylphenyl)phosphaneyl)benzamido)-1,2-diphenylethyl)- $N^2,N^2$ -diisopropylamide (L11)

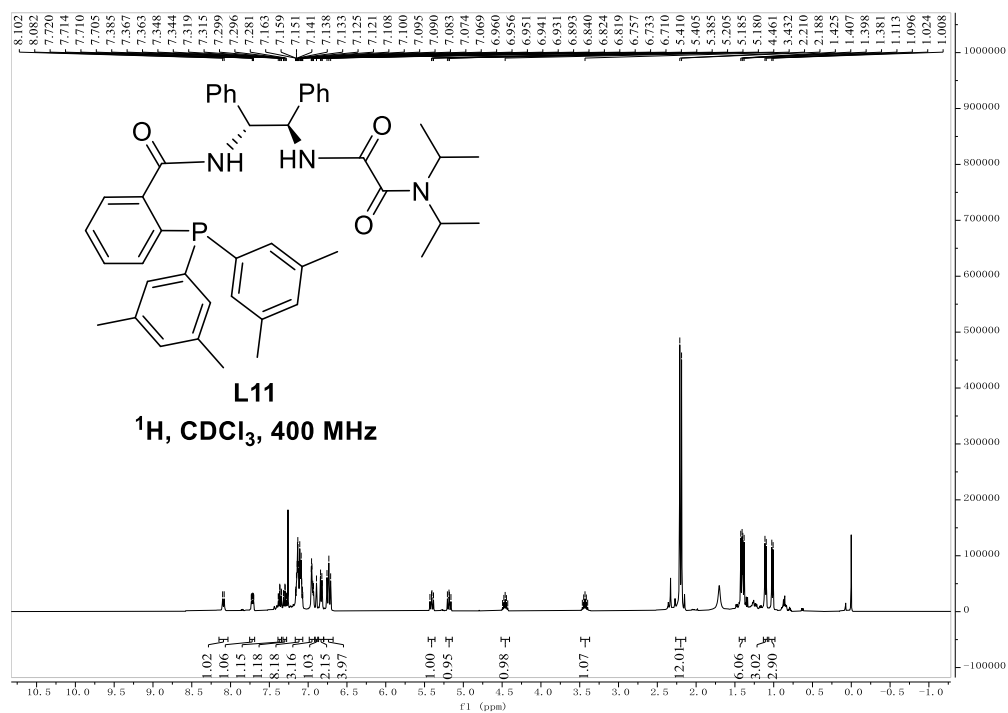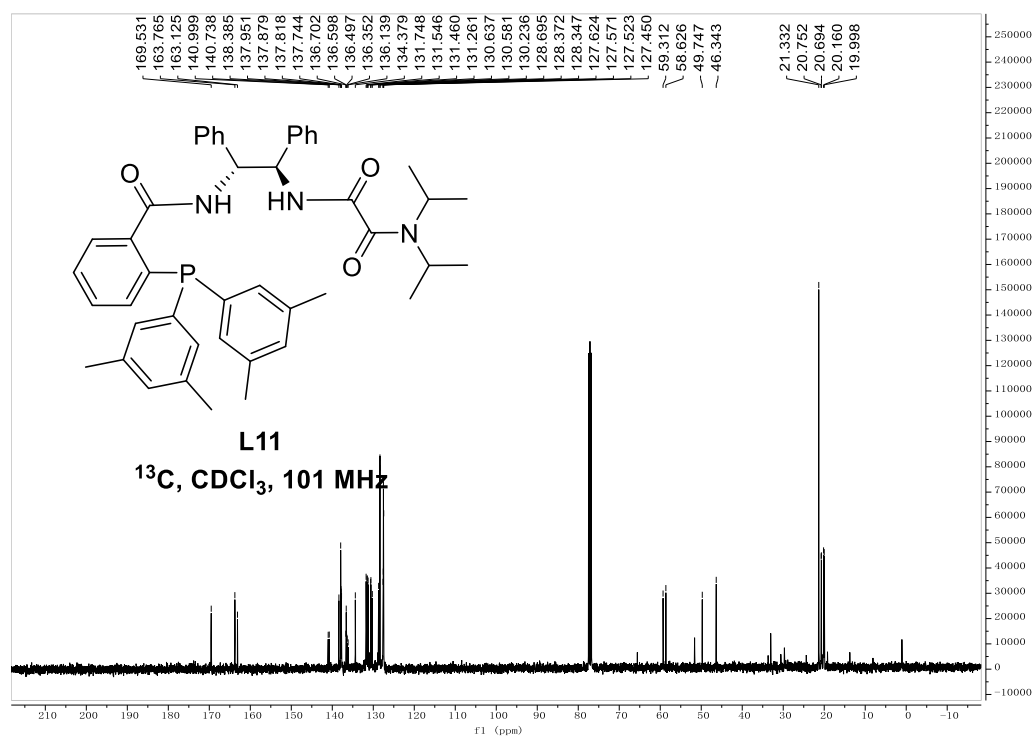

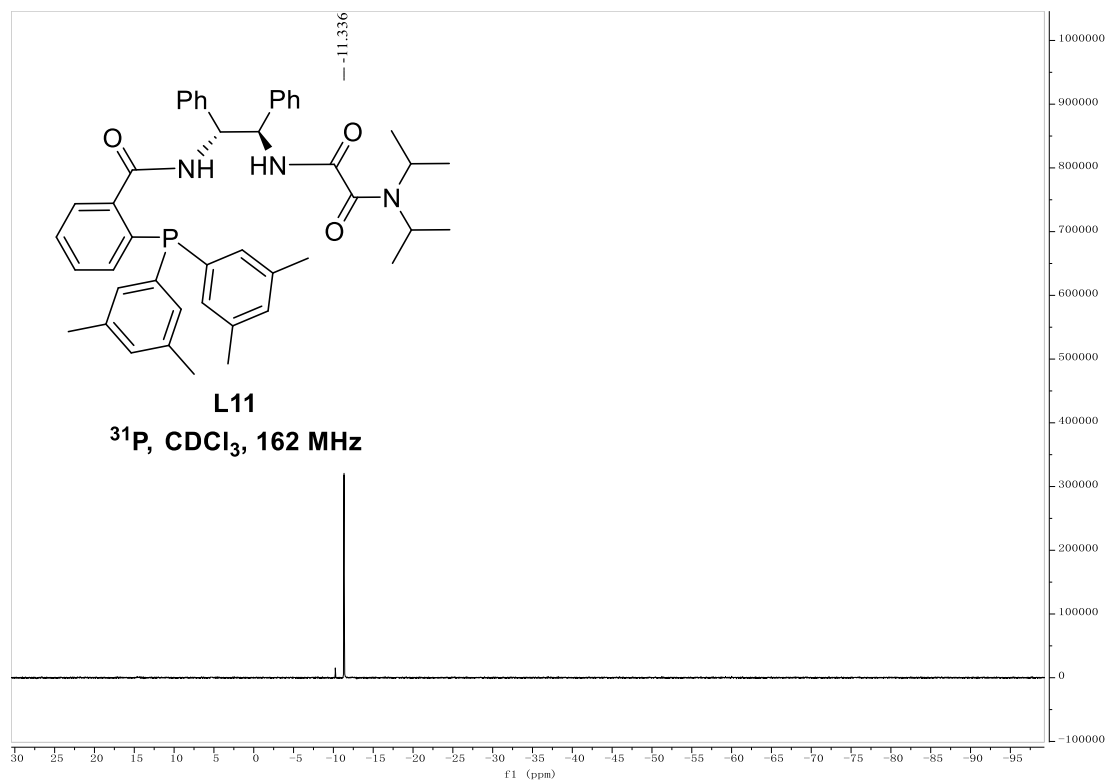

**$N^1$ -((*1R,2R*)-2-(2-(bis(3,5-bis(trifluoromethyl)phenyl)phosphanyl)benzamido)-1,2-diphenylethyl)- $N^2, N^2$ -diisopropylamide (L12)**

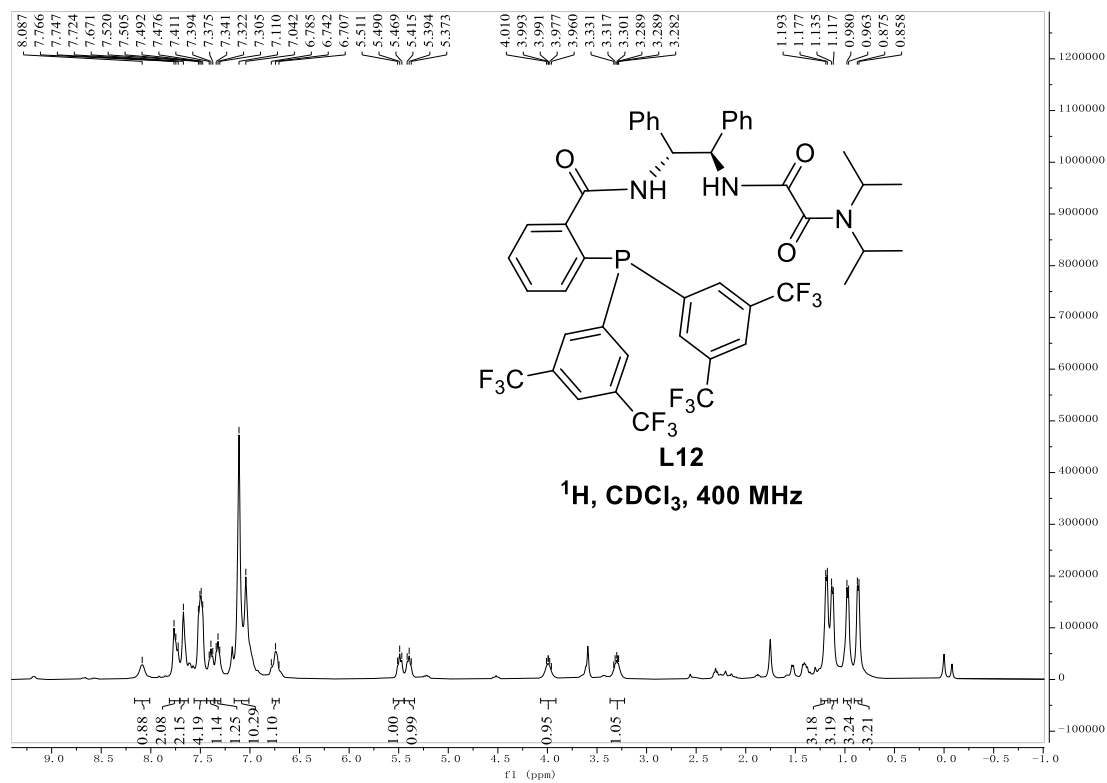

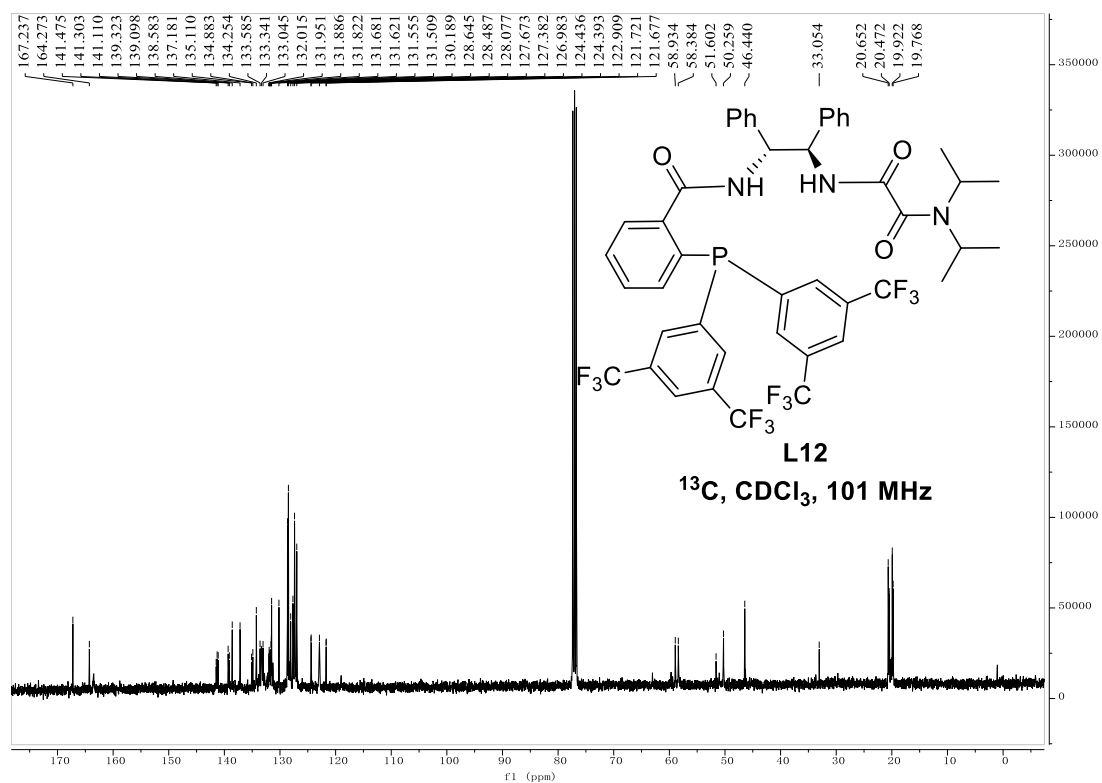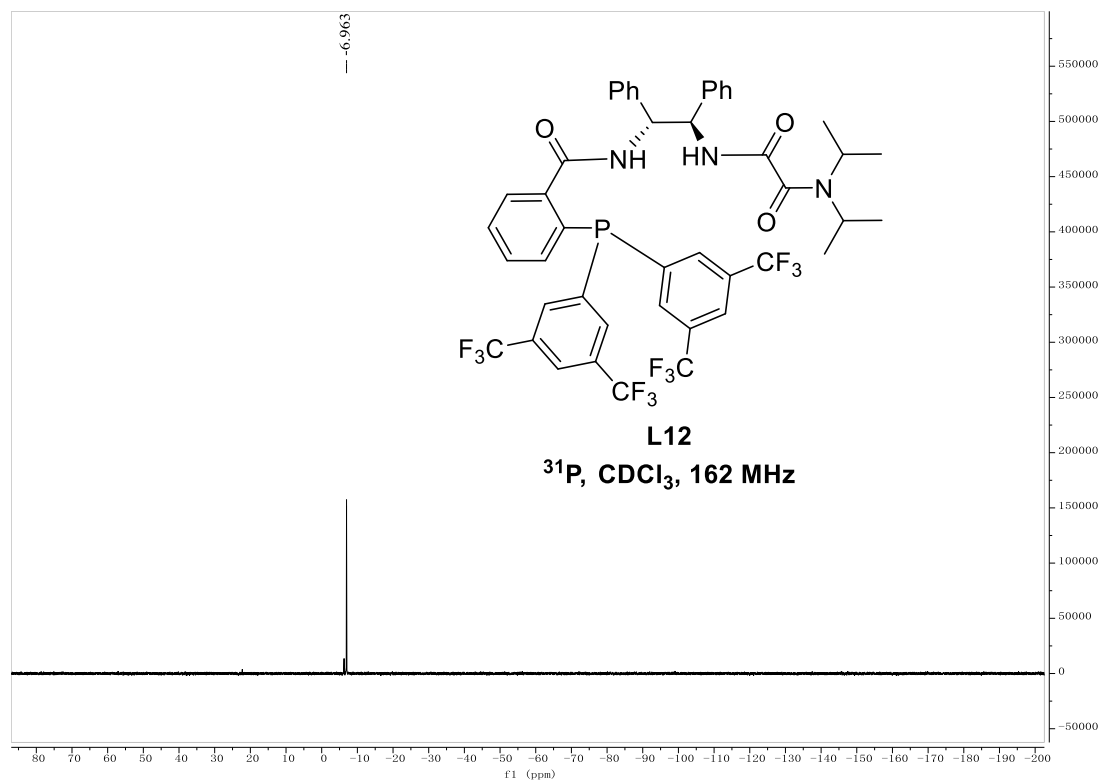

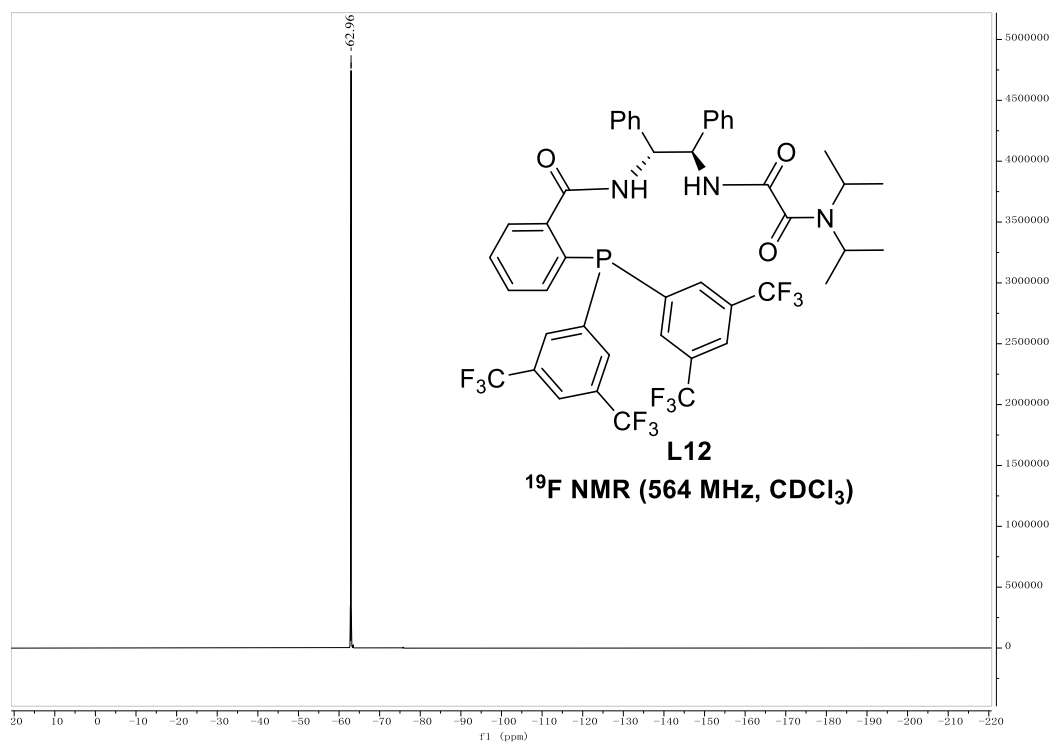

***N*<sup>1</sup>-((1*R*,2*R*)-2-(2-(bis(3,5-dimethylphenyl)phosphaneyl)benzamido)-1,2-diphenylethyl)-*N*<sup>2</sup>,*N*<sup>2</sup>-diphenyloxalamidee (L13)**

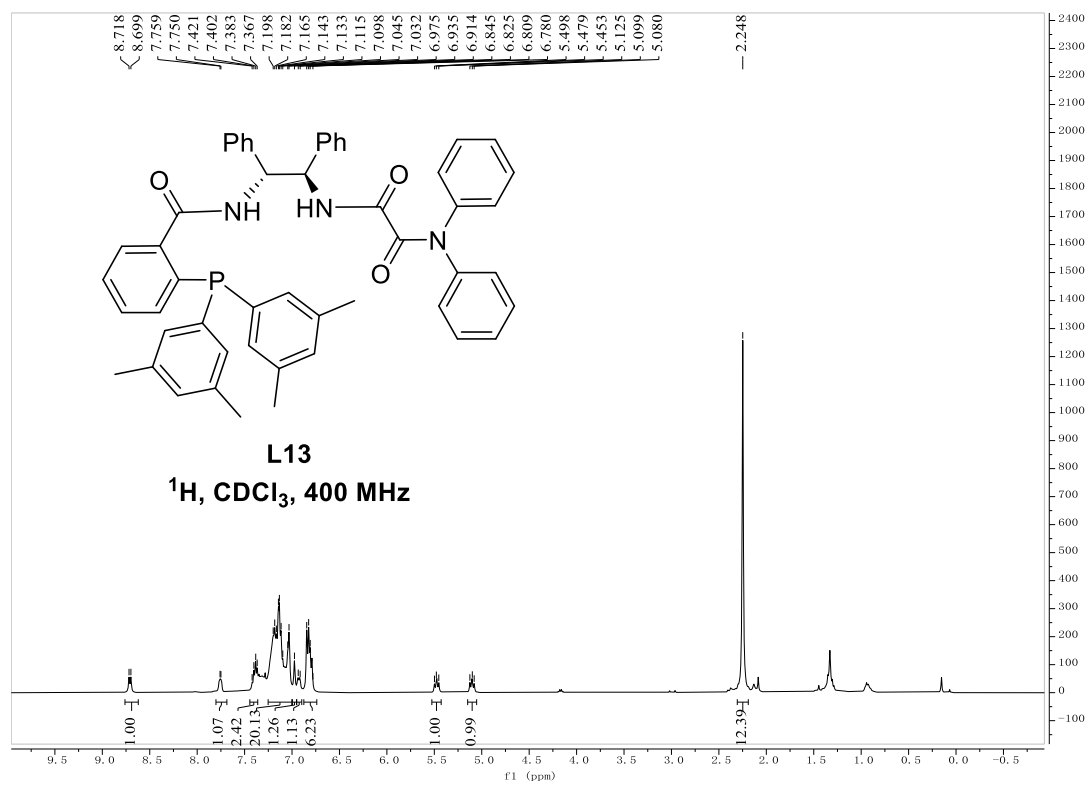



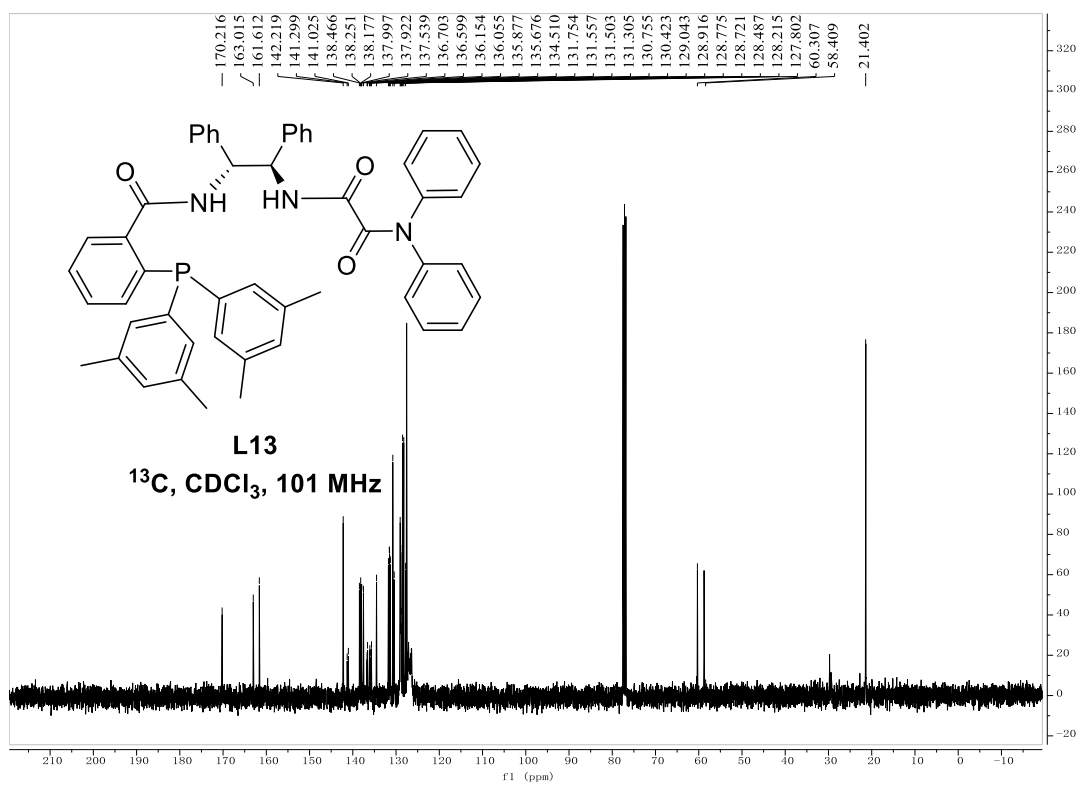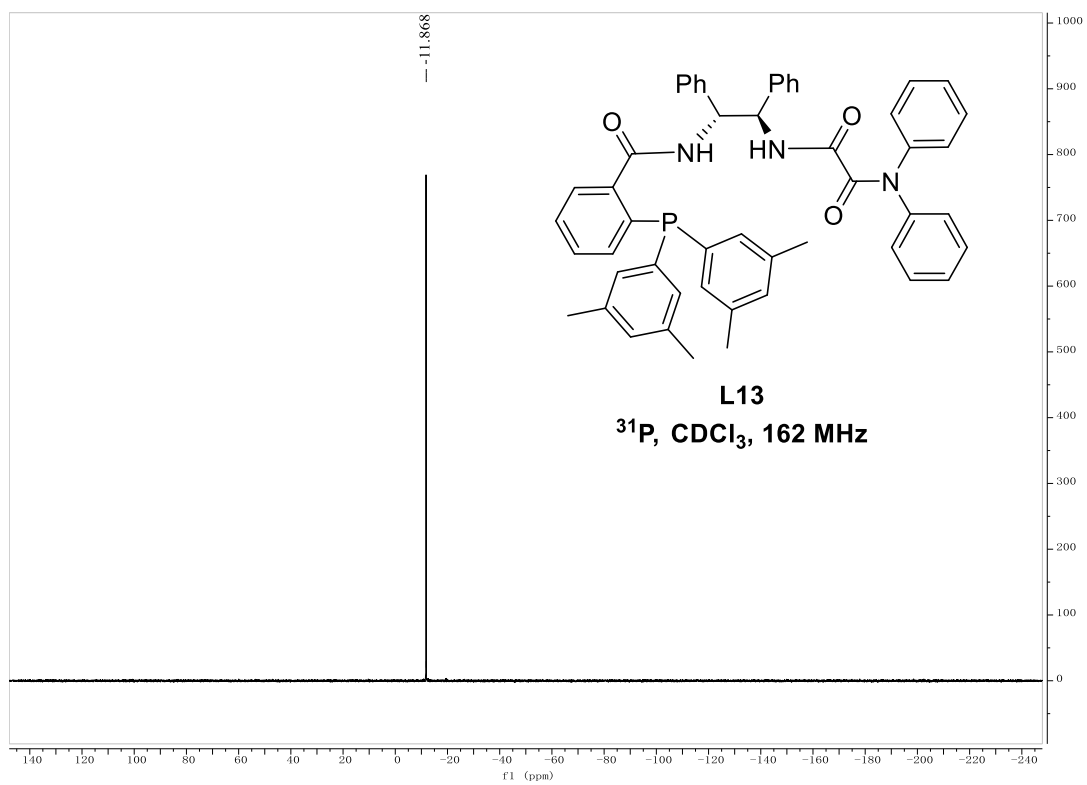

**(2*R*,3*R*)-2-phenyl-1-tosyl-3-vinylindoline (3a)**

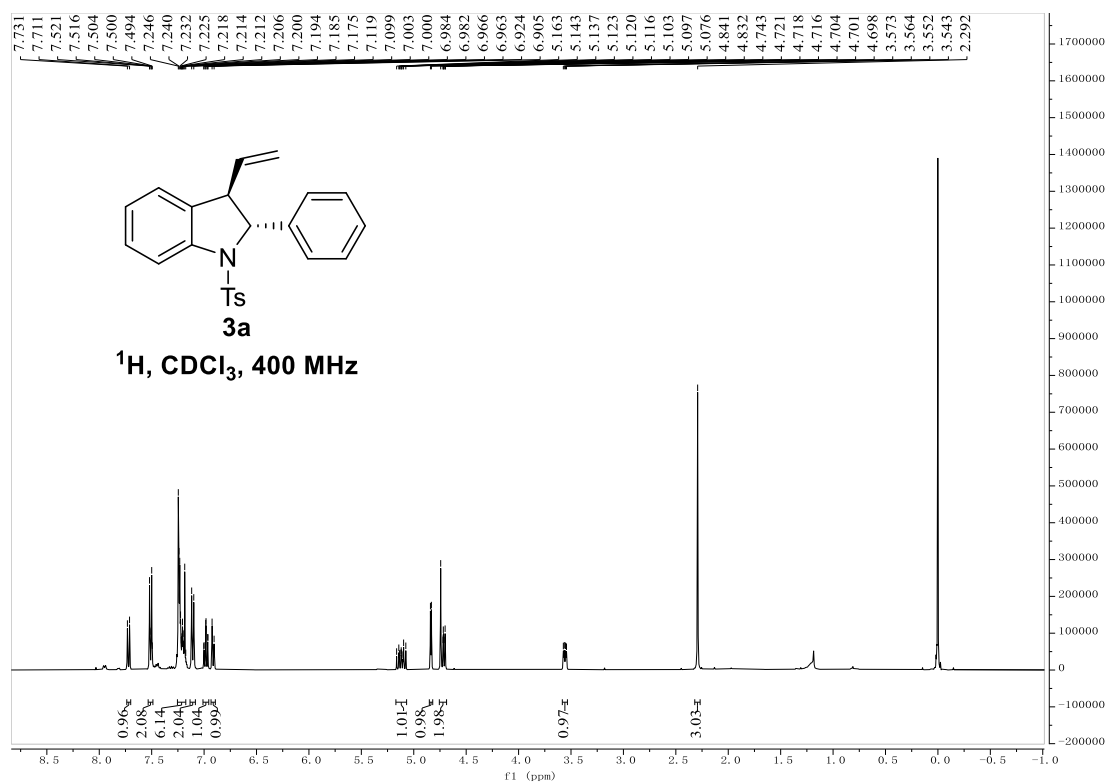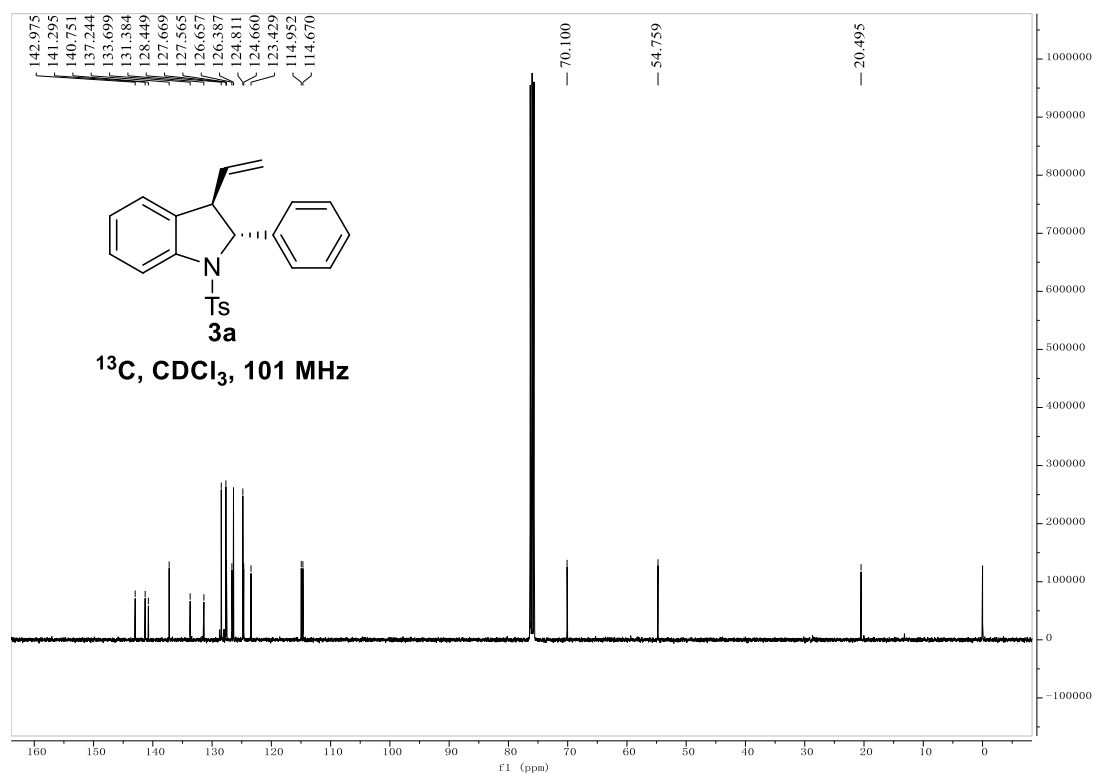

**(2*R*,3*R*)-2-(*p*-tolyl)-1-tosyl-3-vinylindoline (**3b**)**

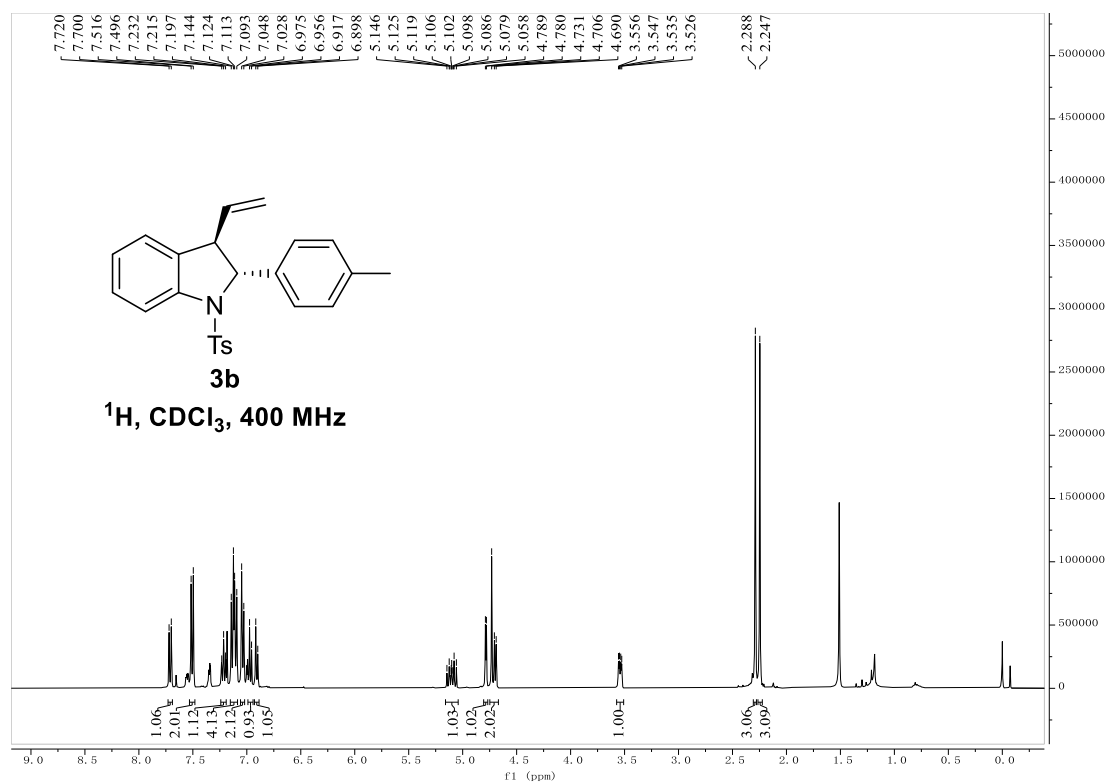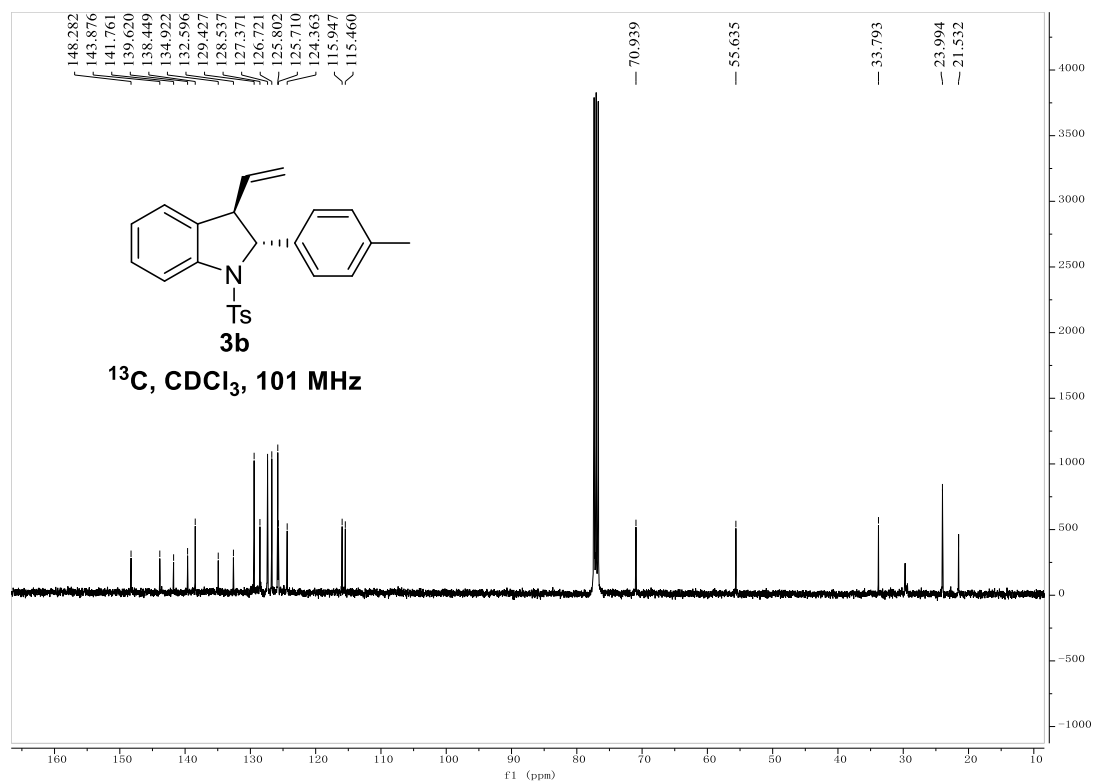

**(2*R*,3*R*)-2-(4-ethylphenyl)-1-tosyl-3-vinylindoline (3c)**

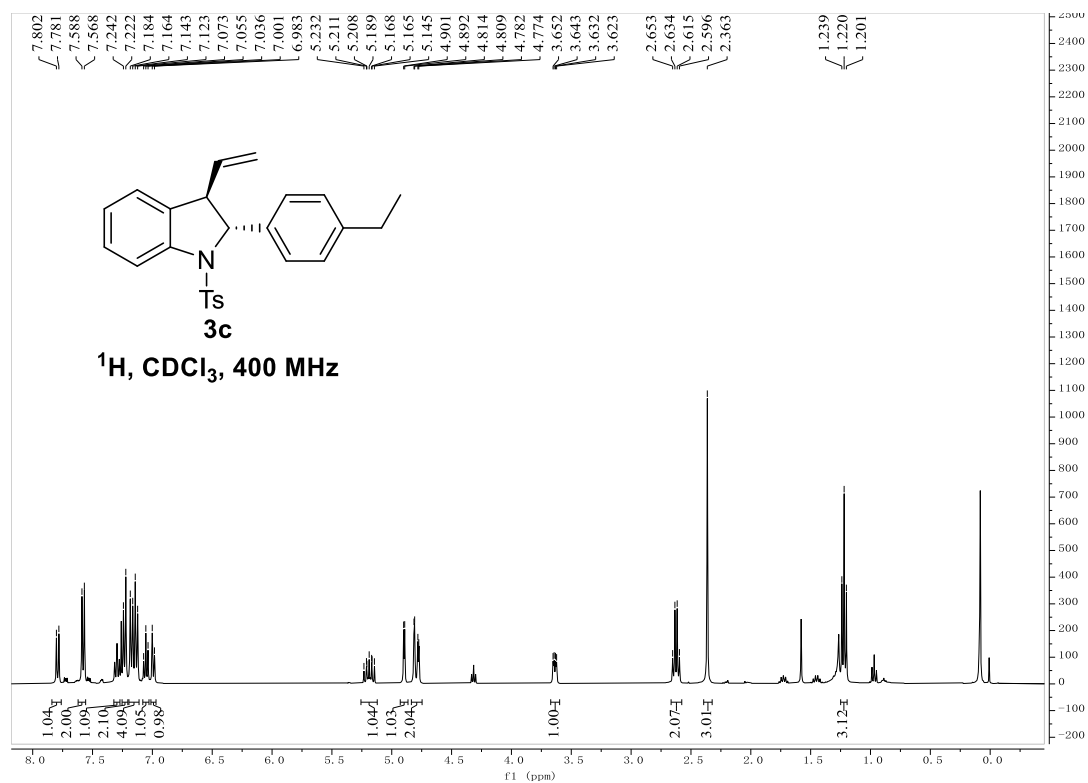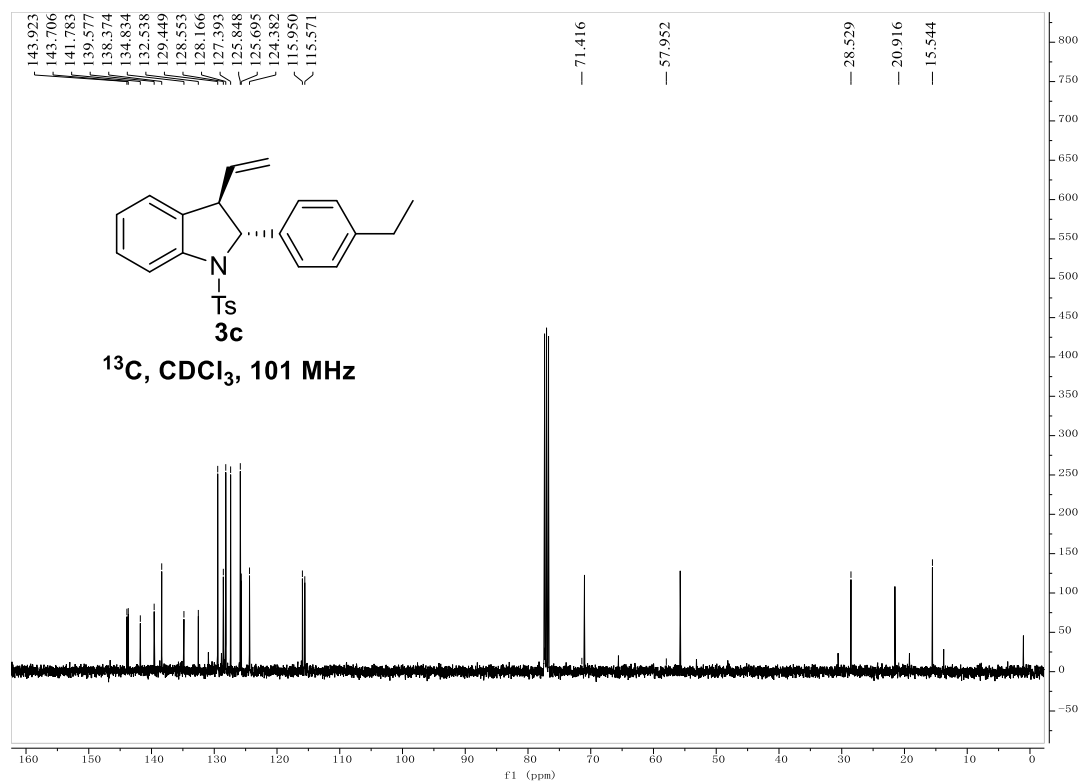

**(2*R*,3*R*)-2-(4-isopropylphenyl)-1-tosyl-3-vinylindoline (3d)**

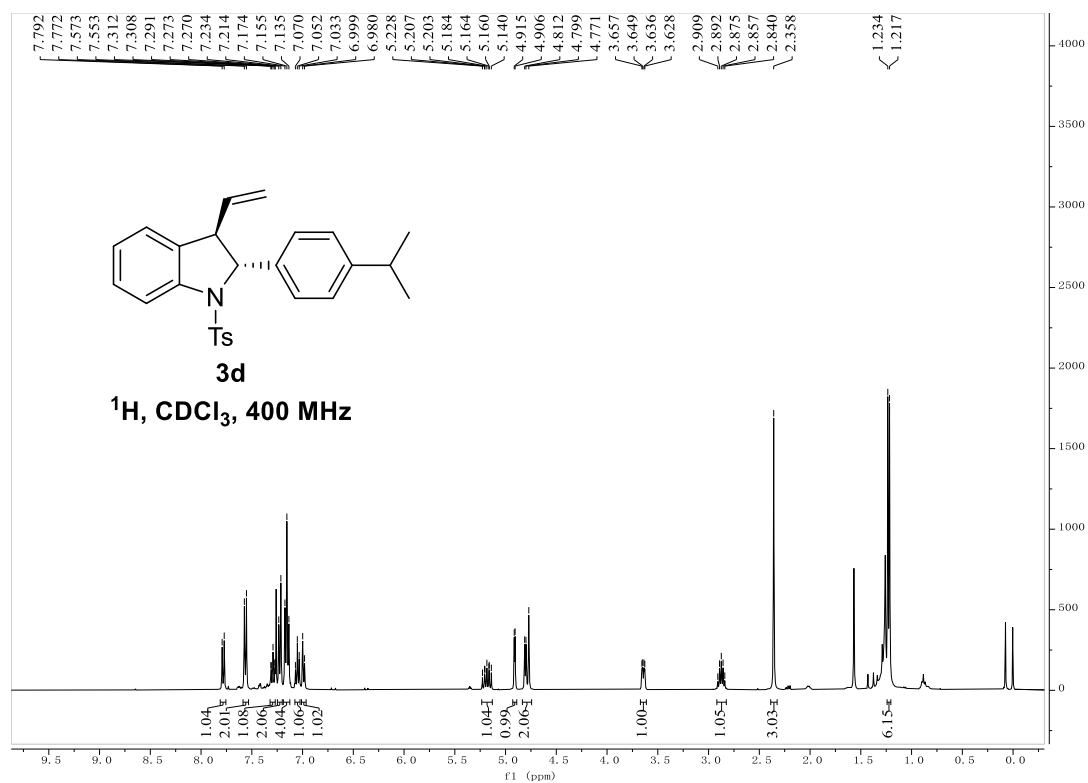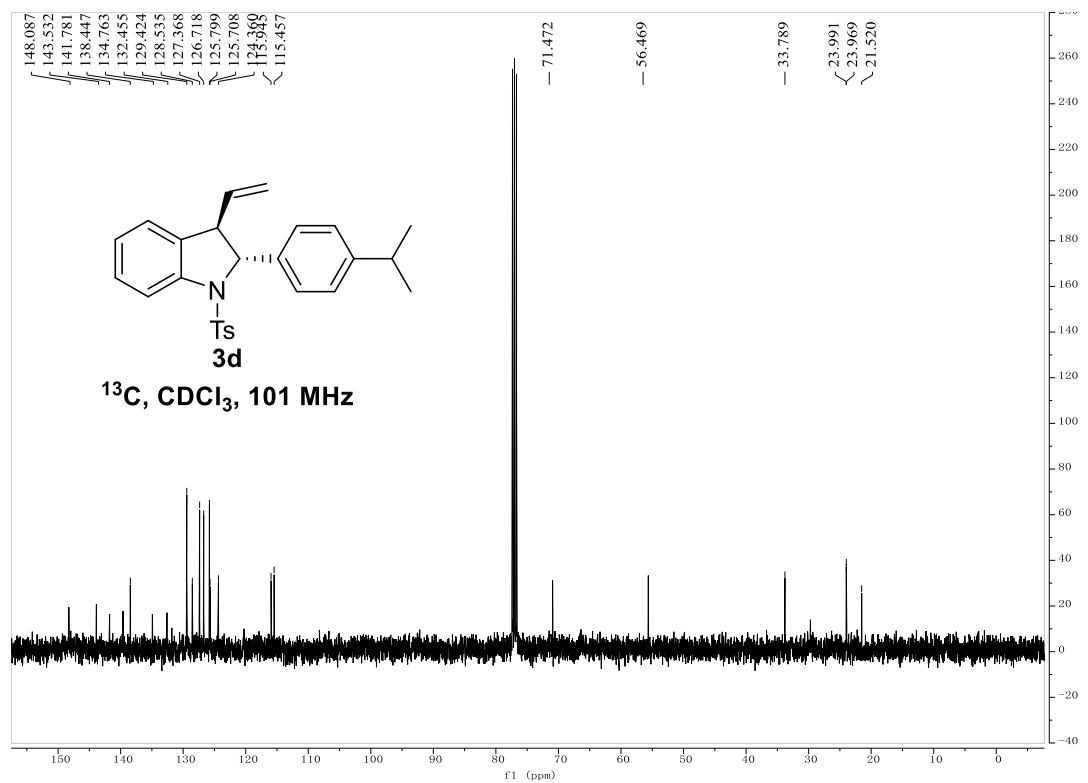

**(2*R*,3*R*)-2-(4-(*tert*-butyl)phenyl)-1-tosyl-3-vinylindoline (3e)**

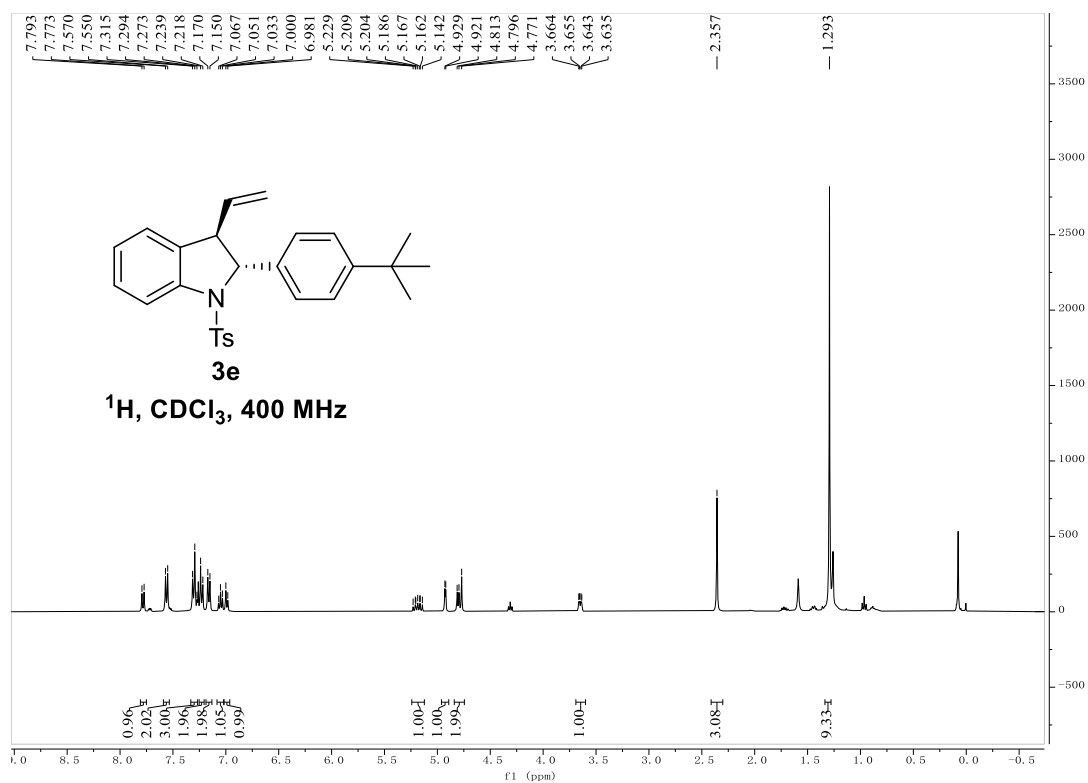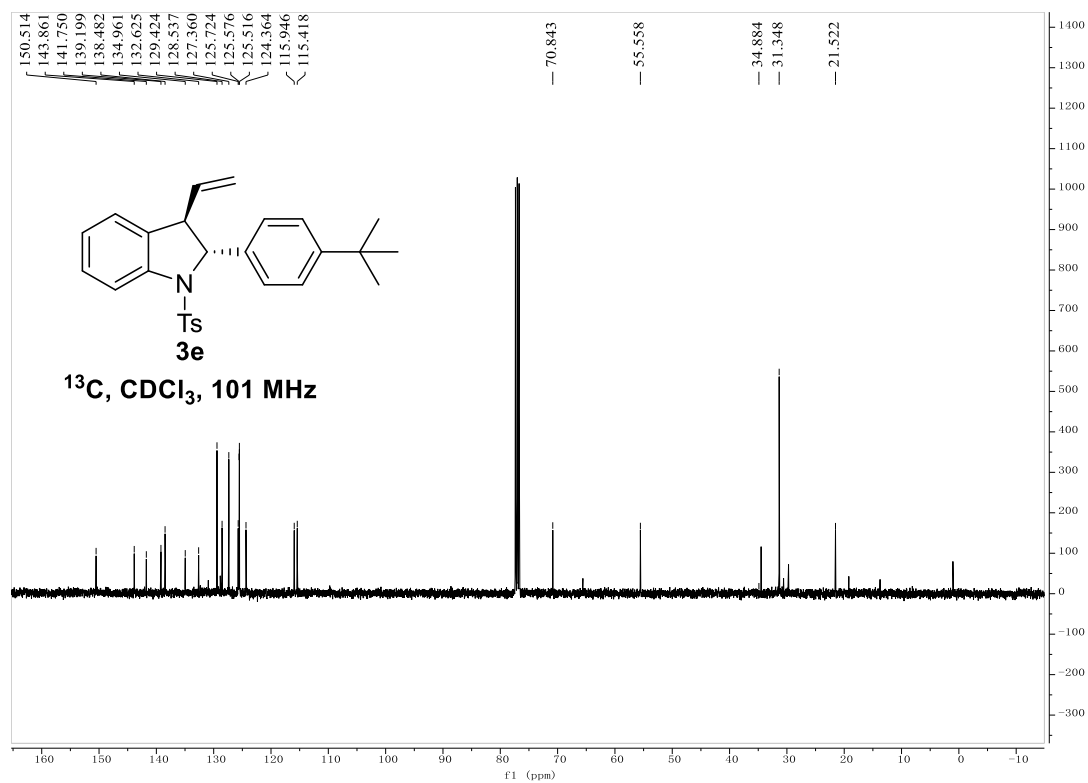

**(2*R*,3*R*)-2-(4-methoxyphenyl)-1-tosyl-3-vinylindoline (3f)**

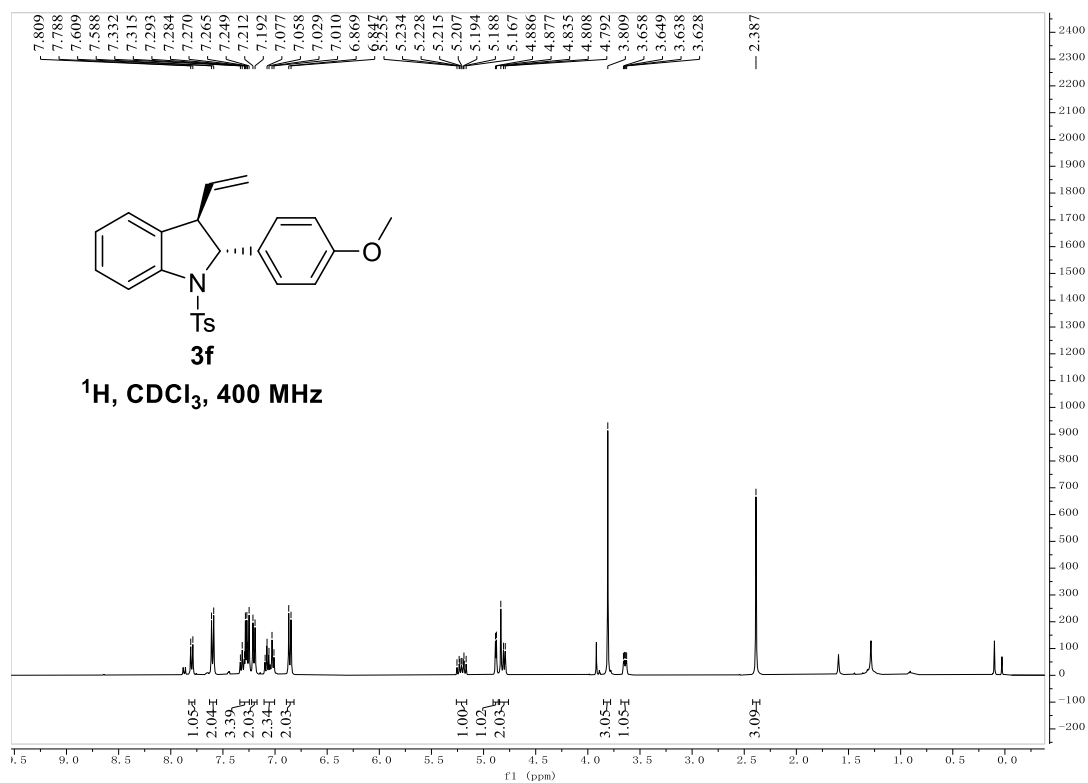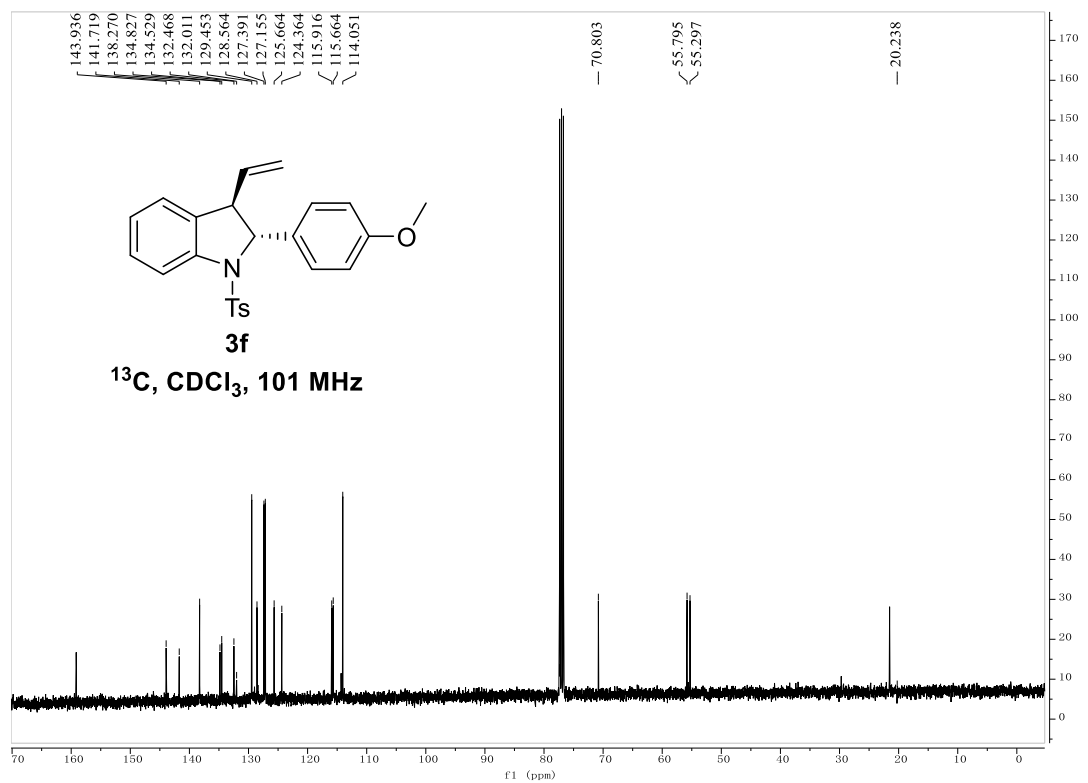

**(2*R*,3*R*)-2-(4-fluorophenyl)-1-tosyl-3-vinylindoline (3g)**

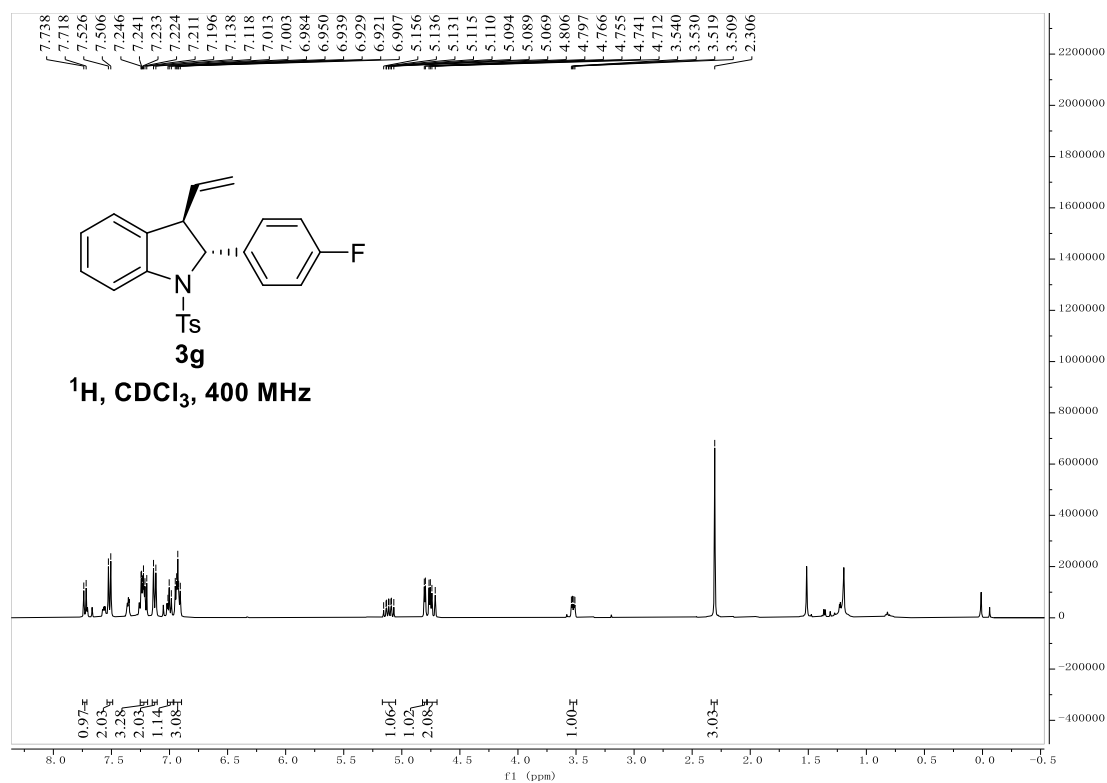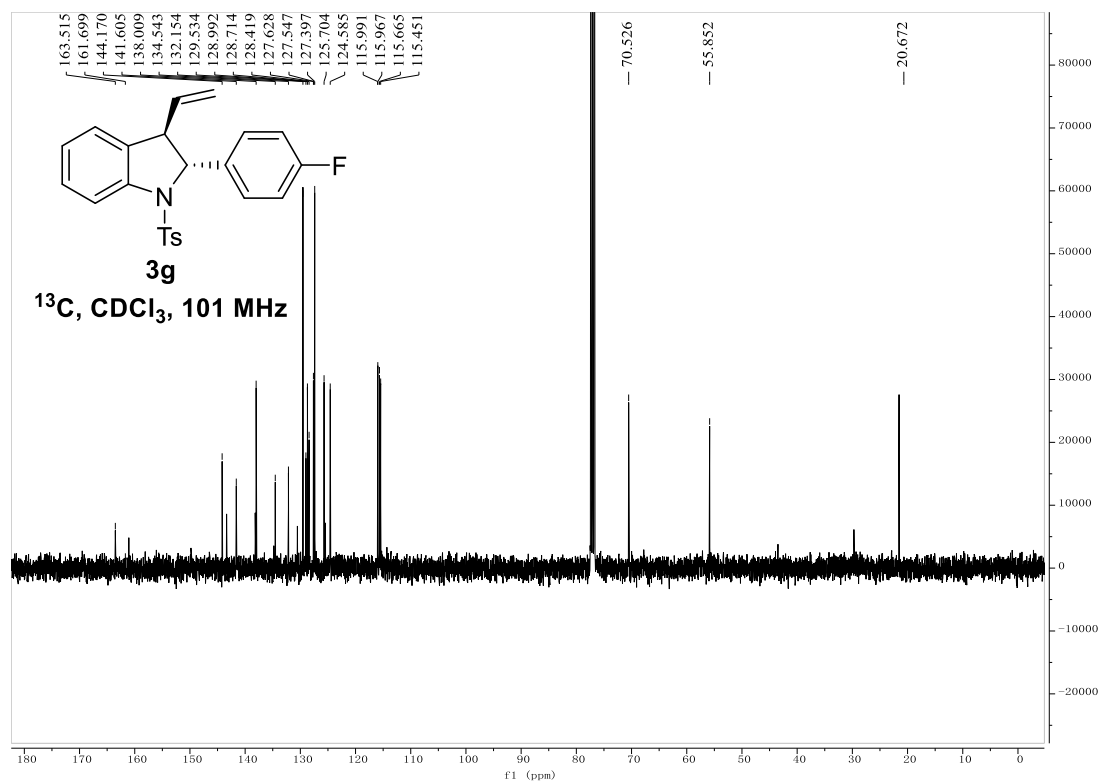



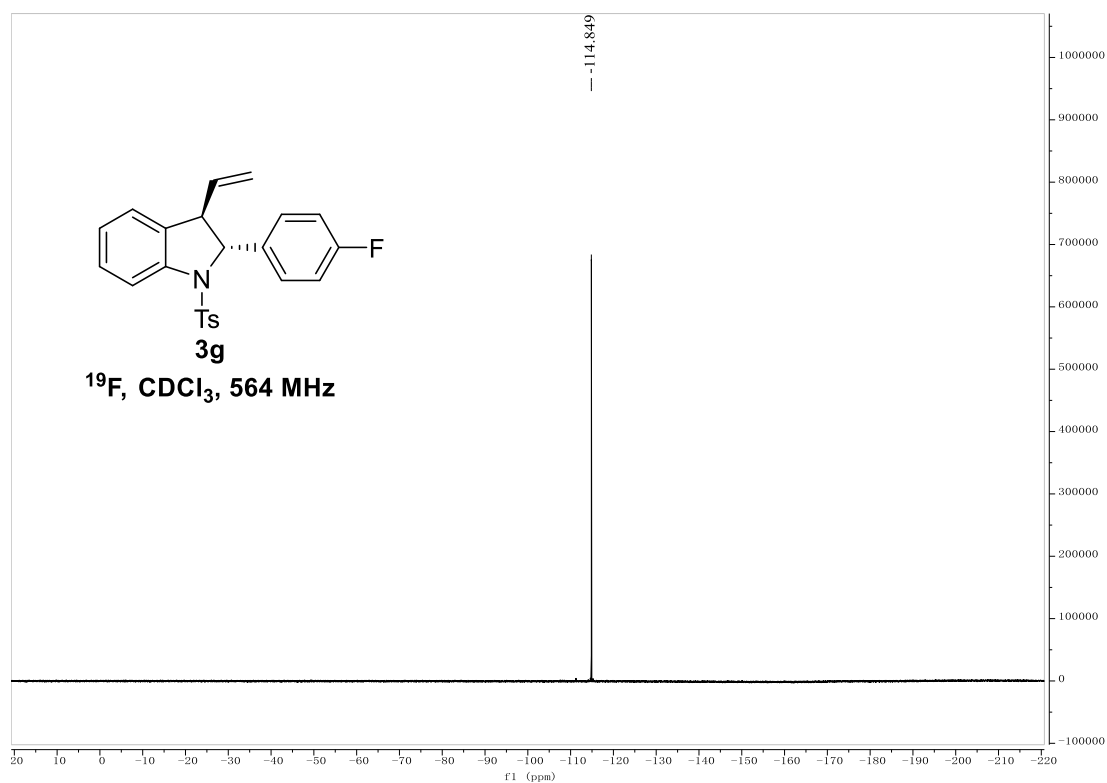

**(2R,3R)-2-(4-chlorophenyl)-1-tosyl-3-vinylindoline (3h)**

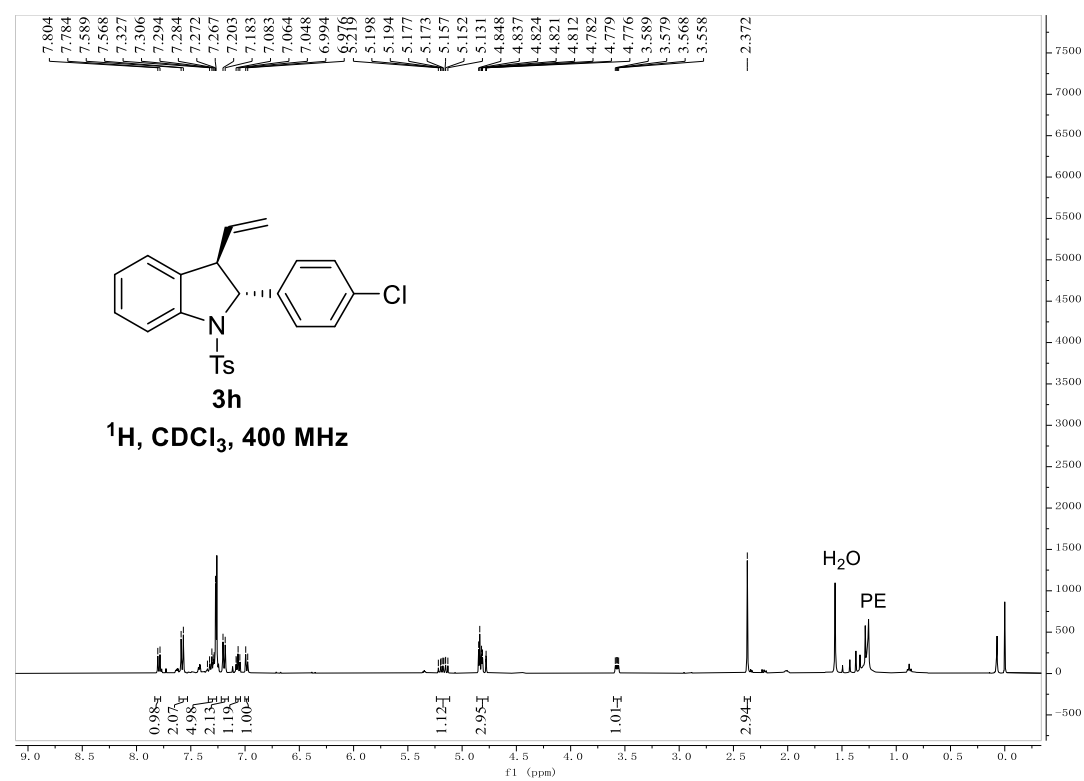

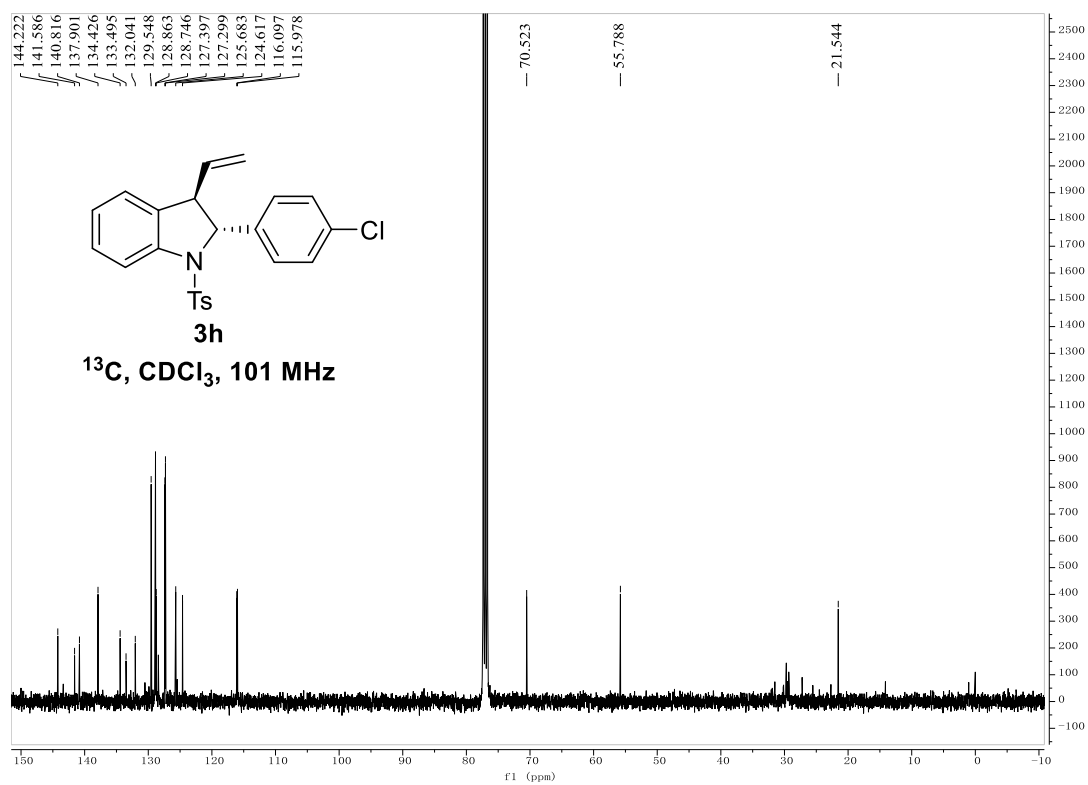

**(2*R*,3*R*)-2-(4-bromophenyl)-1-tosyl-3-vinylindoline (3i)**

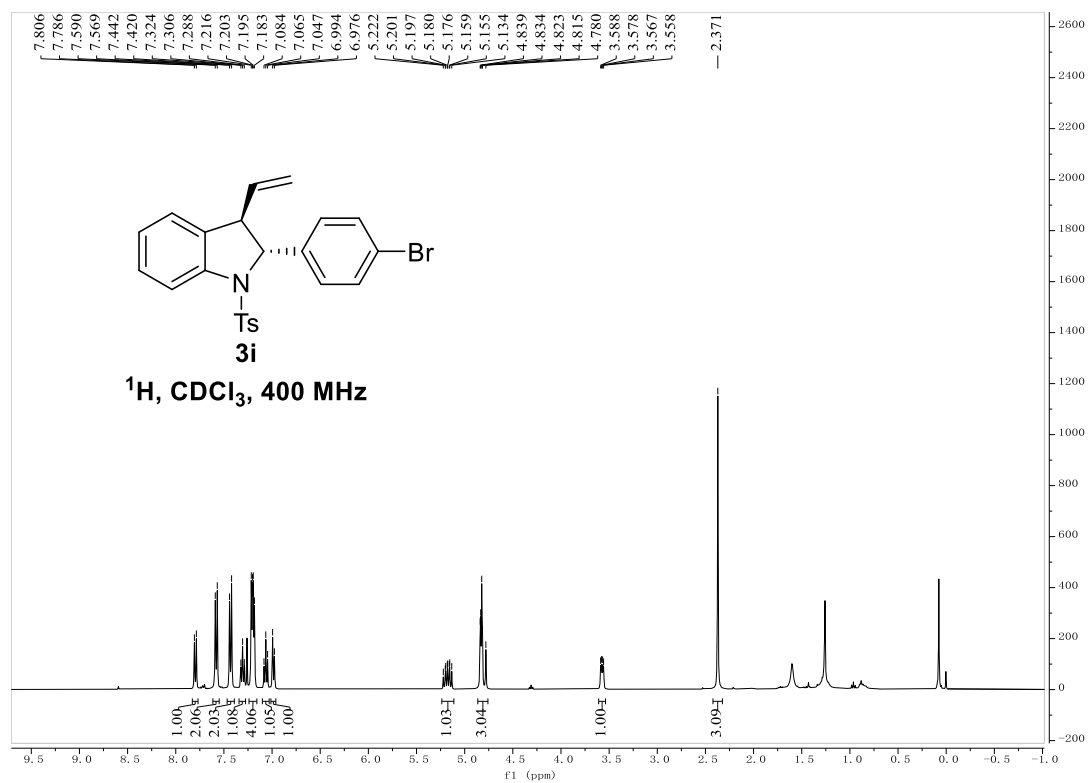

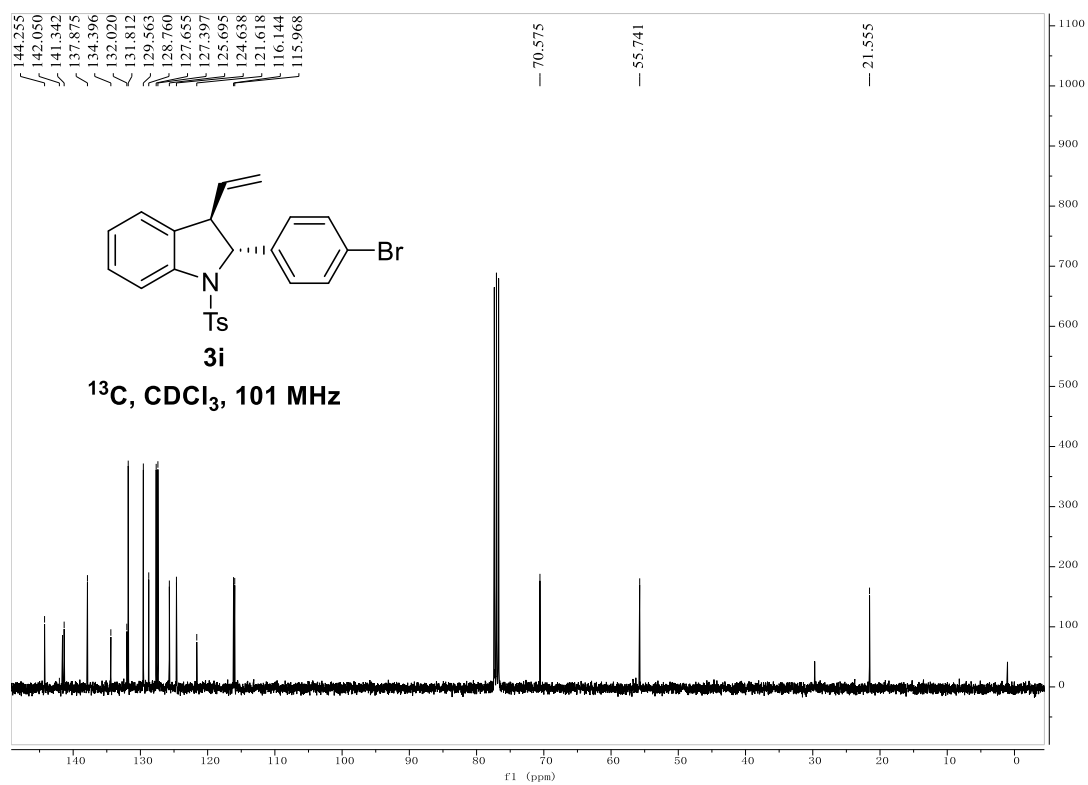

**(2*R*,3*R*)-2-(4-iodophenyl)-1-tosyl-3-vinylindoline (3j)**

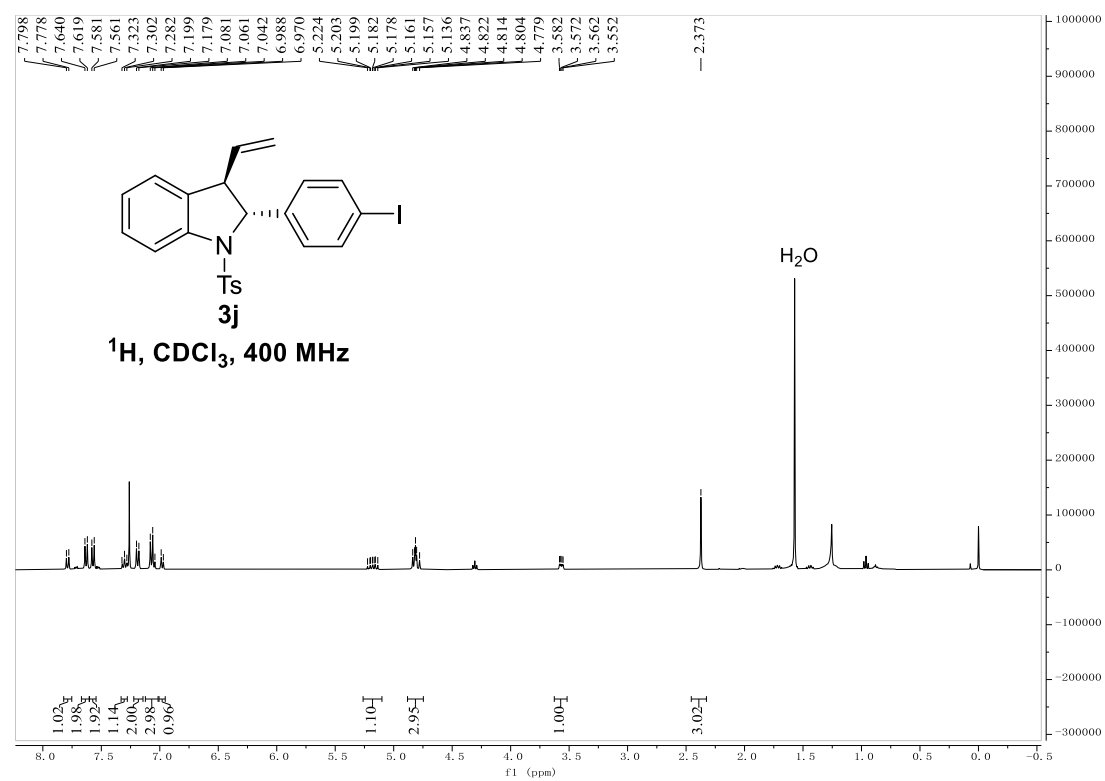

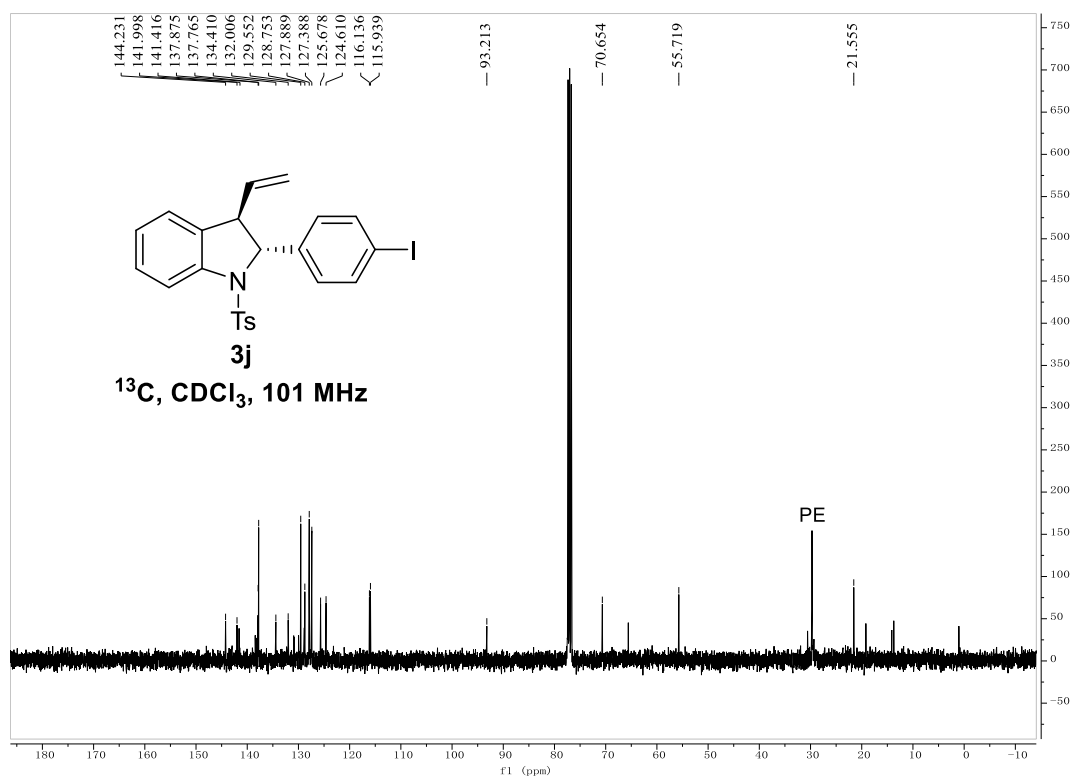

**(2*R*,3*R*)-1-tosyl-2-(4-(trifluoromethyl)phenyl)-3-vinylindoline (3k)**

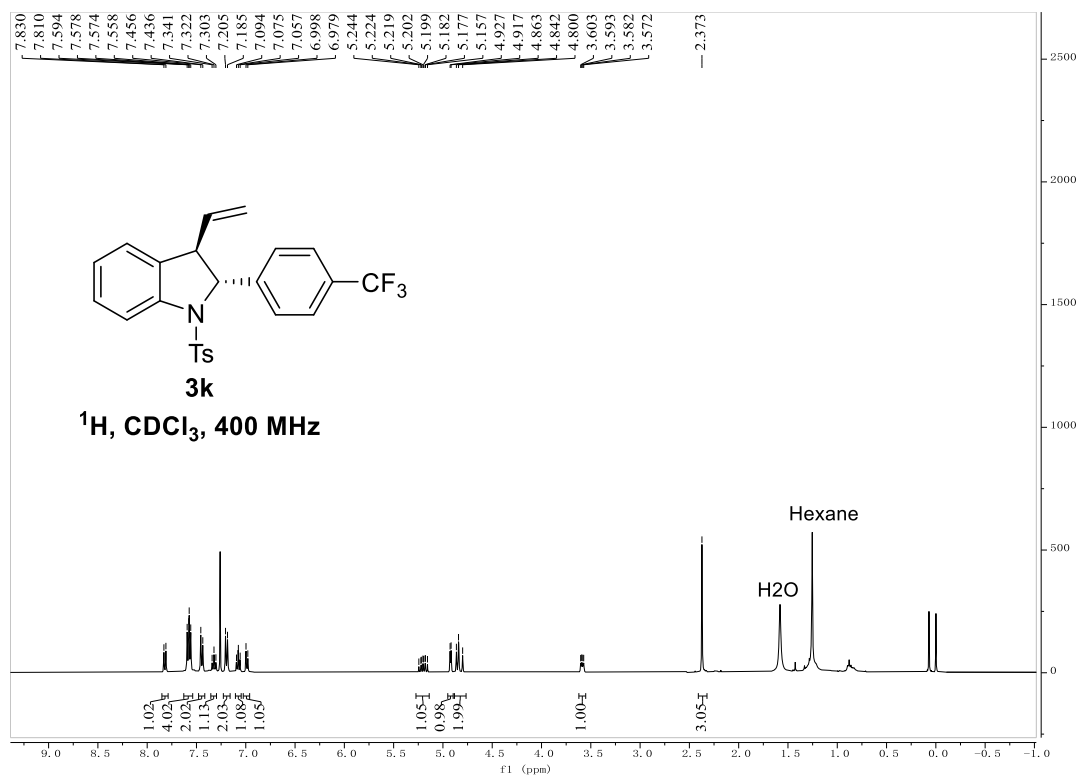

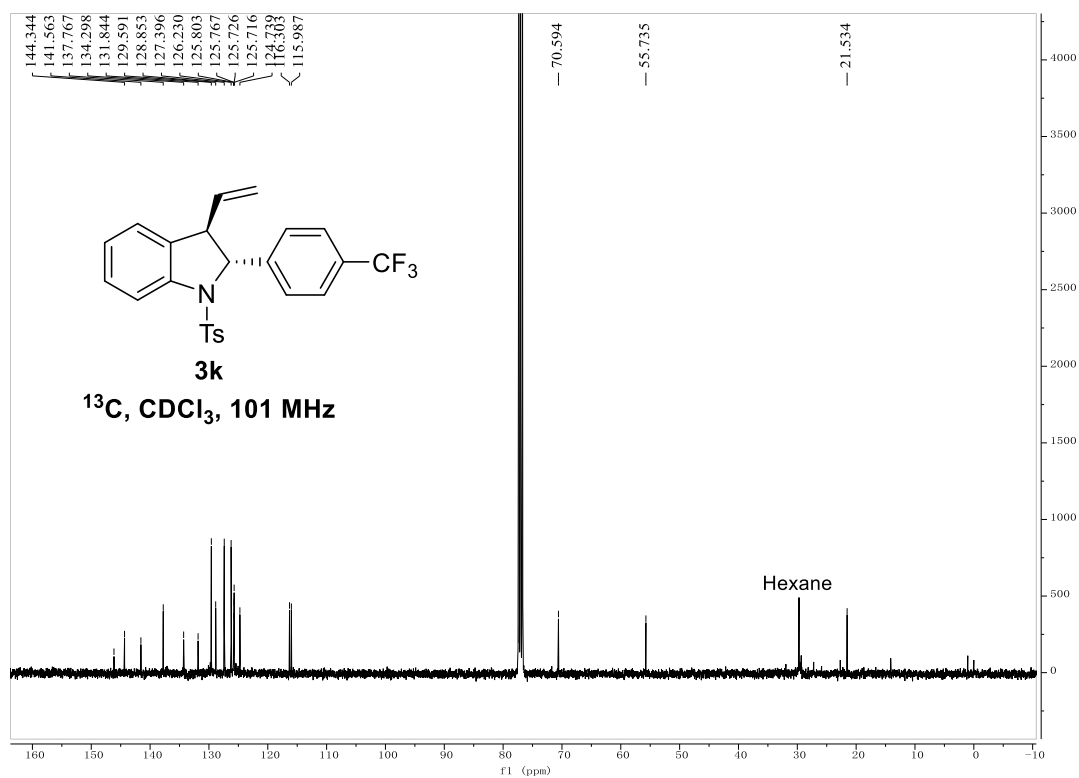

**(2*R*,3*R*)-2-(*m*-tolyl)-1-tosyl-3-vinylindoline (3l)**

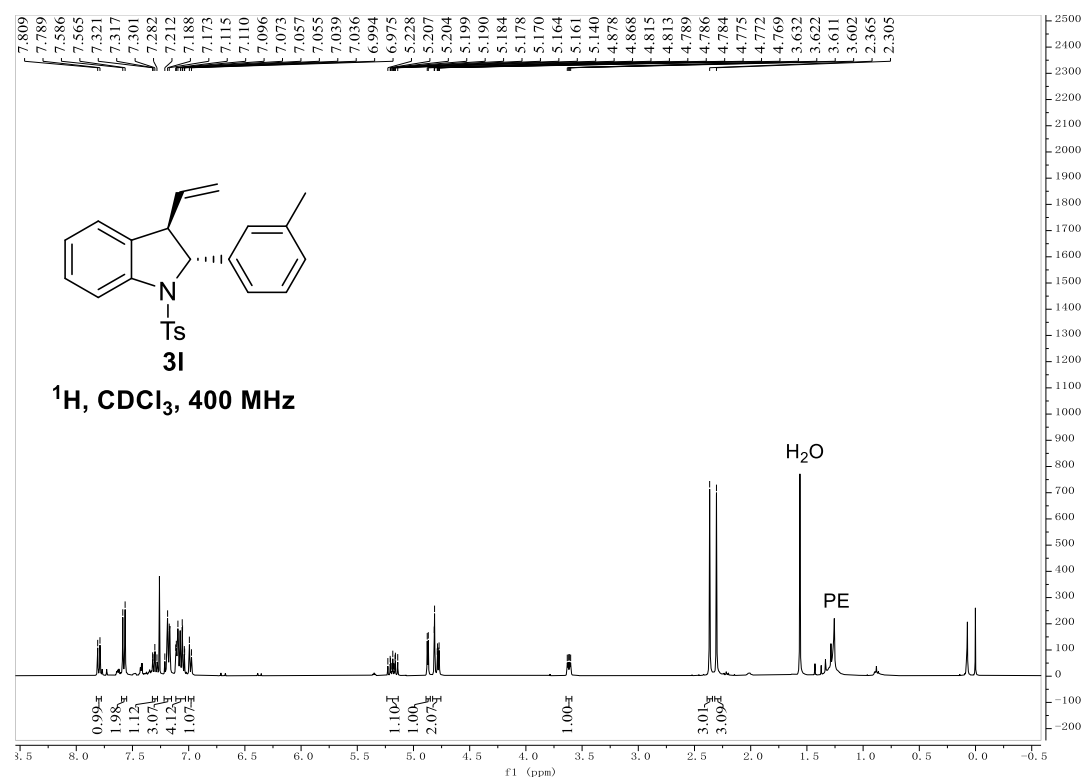

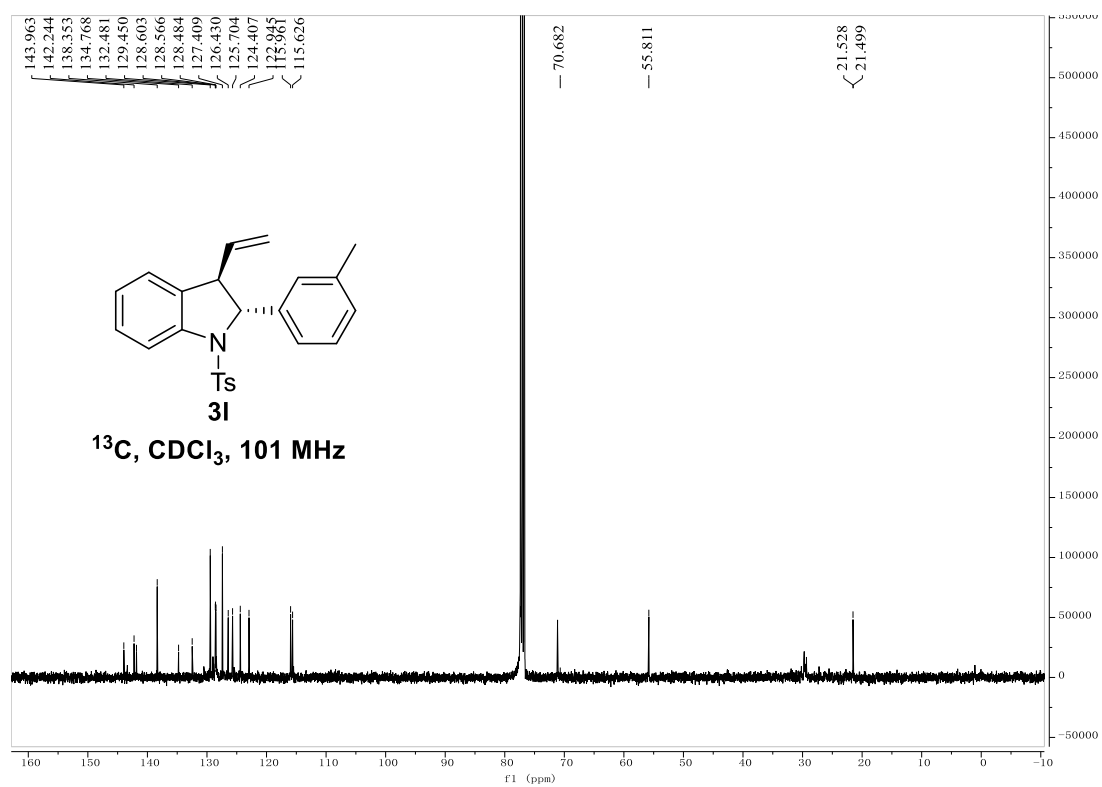

**(2*R*,3*R*)-2-(3-bromophenyl)-1-tosyl-3-vinylindoline (3m)**

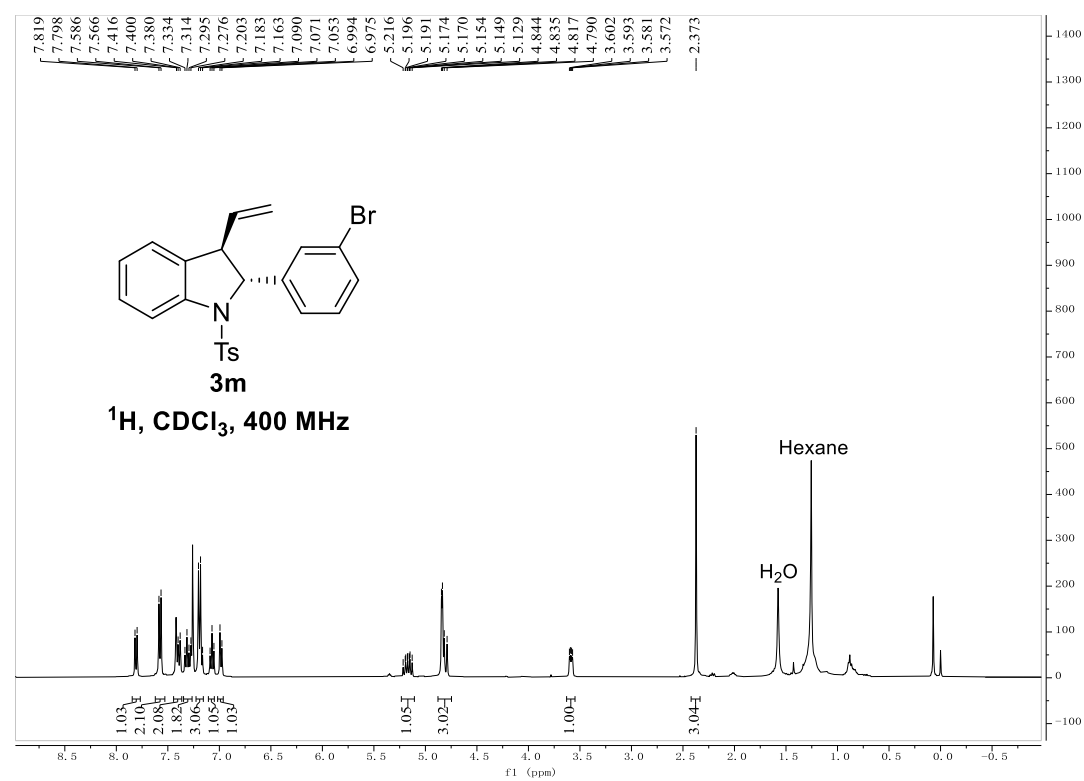

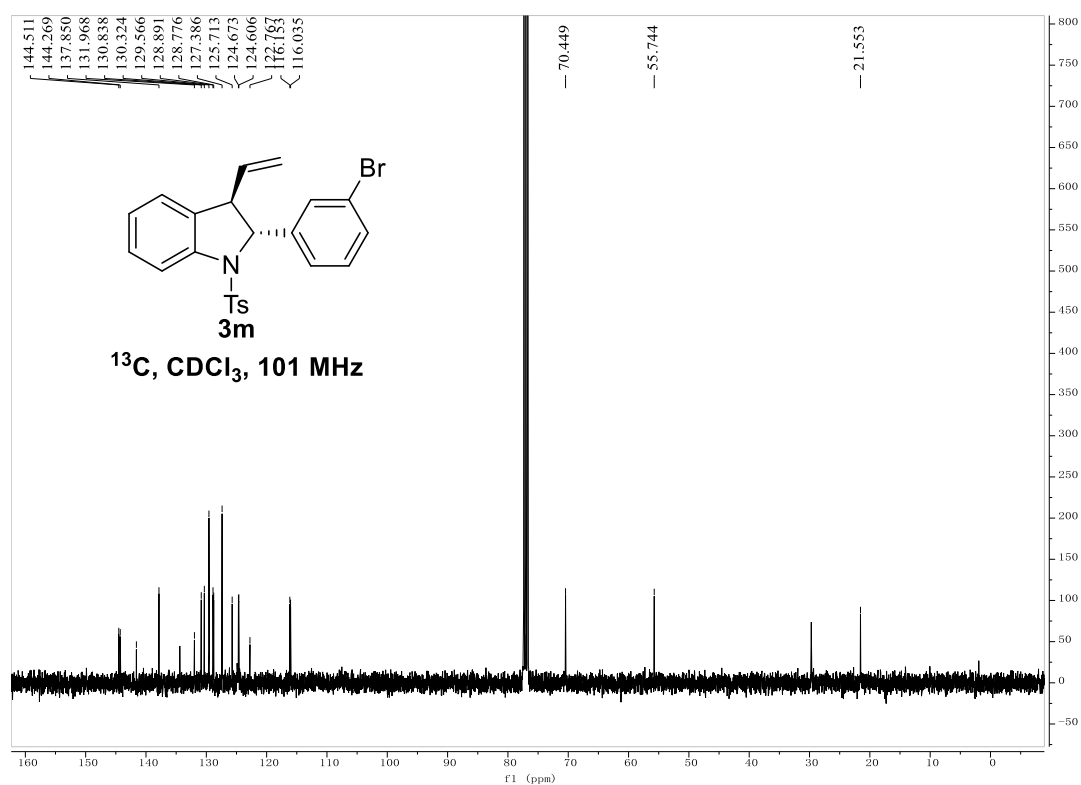

**(2*R*,3*R*)-2-(2-bromophenyl)-1-tosyl-3-vinylindoline (**3n**)**

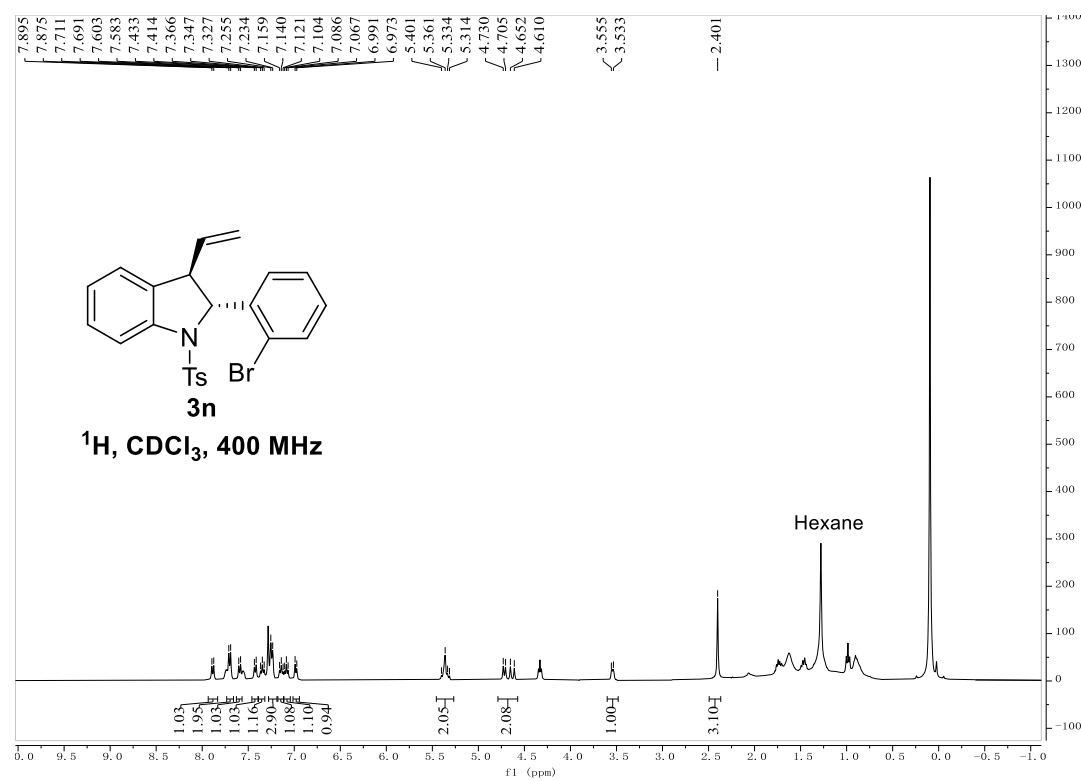

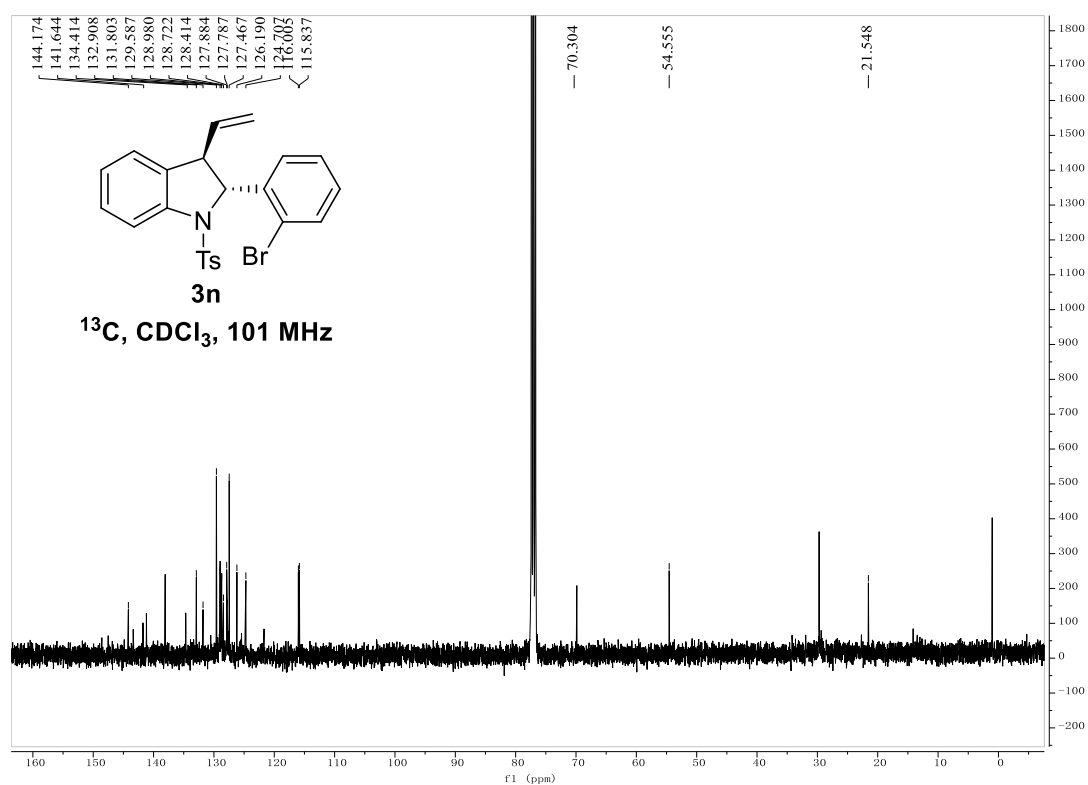

**(2*R*,3*R*)-2-([1,1'-biphenyl]-4-yl)-1-tosyl-3-vinylindoline (3o)**

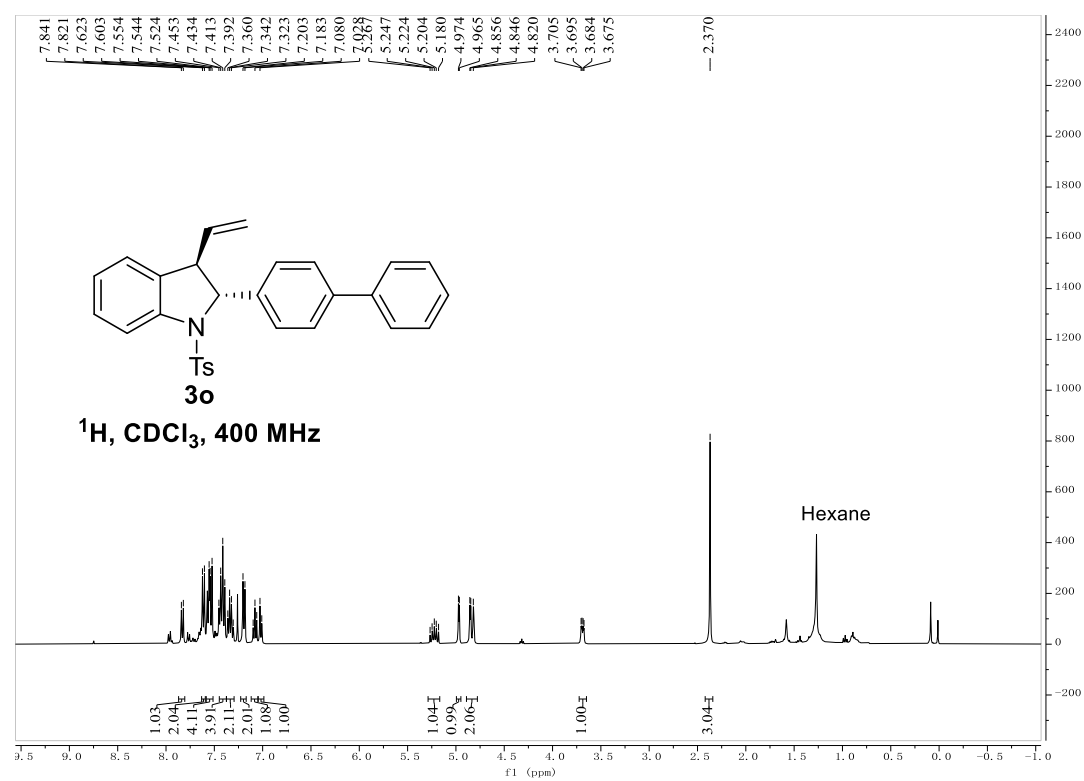



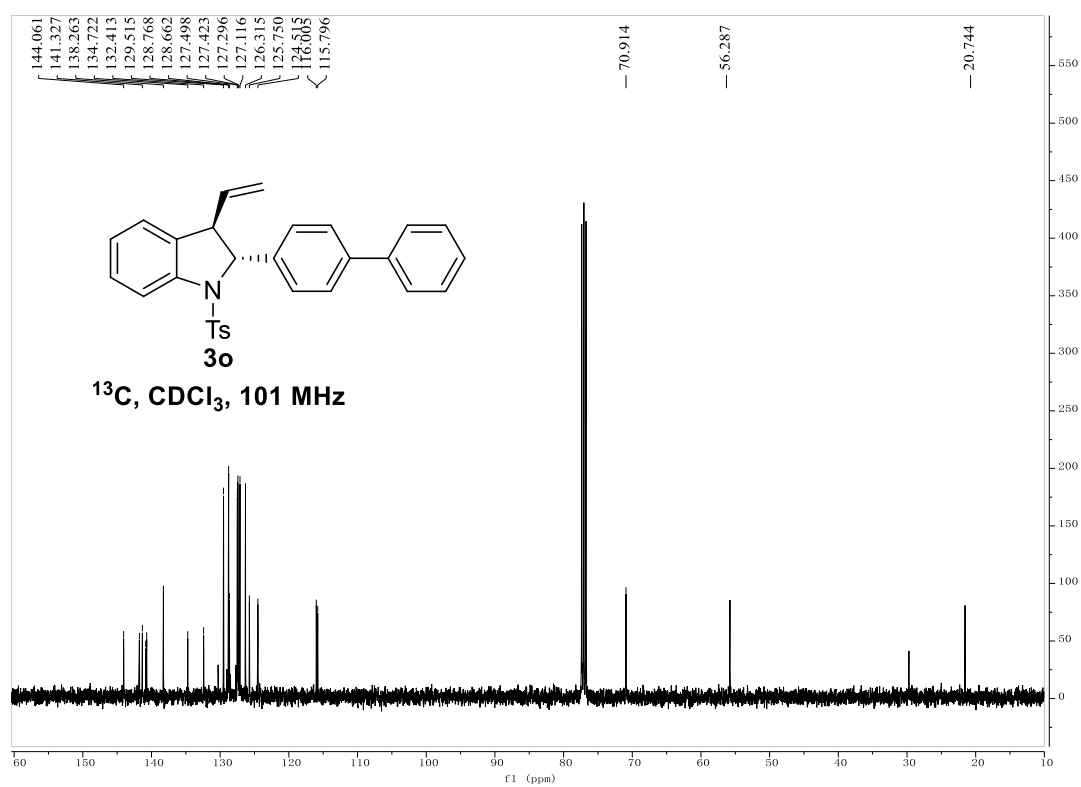

**(2R,3R)-2-(naphthalen-1-yl)-1-tosyl-3-vinylindoline (3p)**

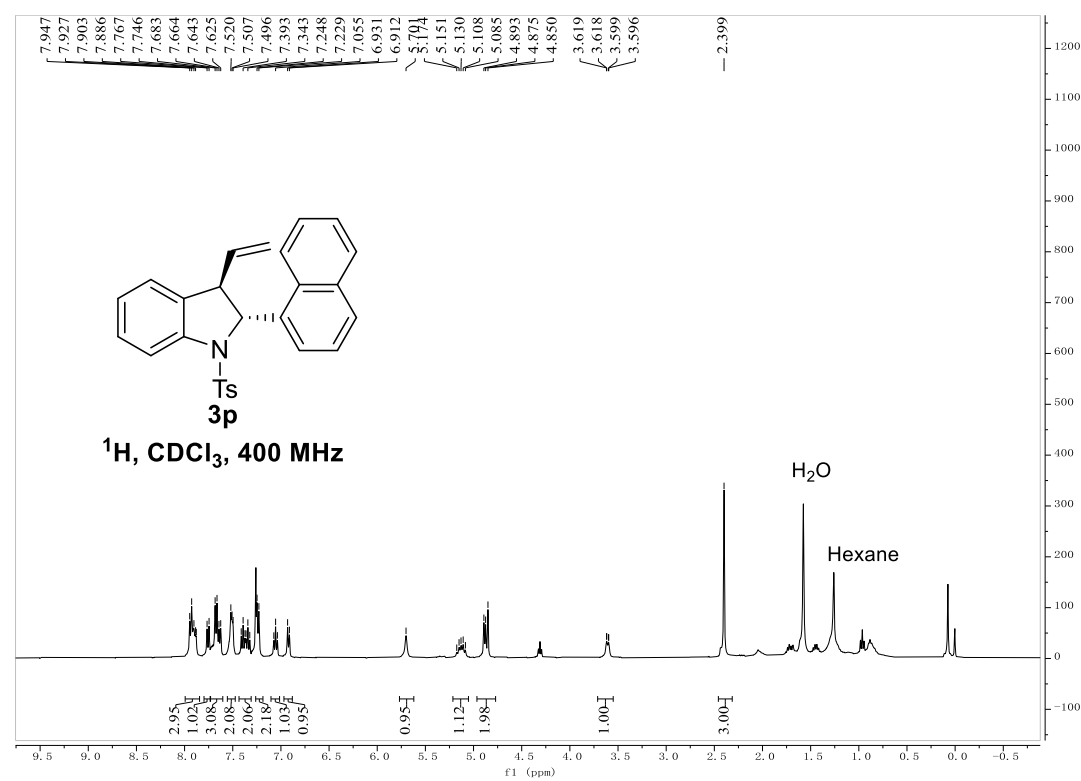

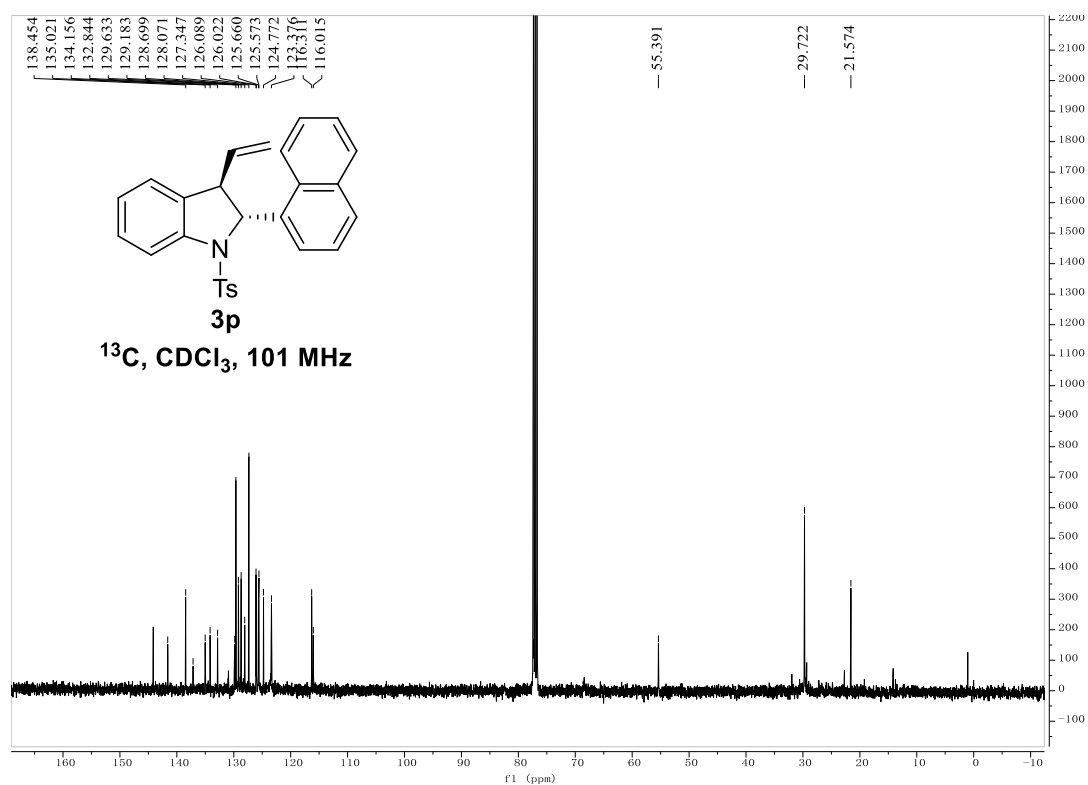

**(2*R*,3*R*)-2-(thiophen-2-yl)-1-tosyl-3-vinylindoline (3q)**

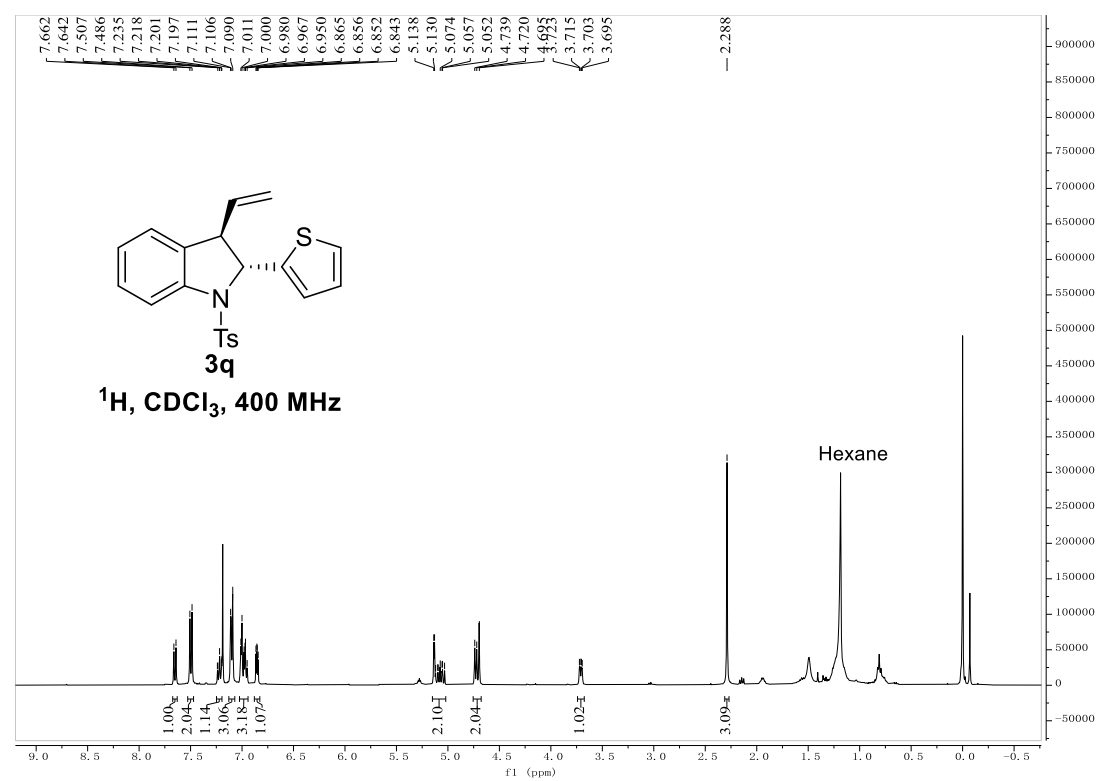

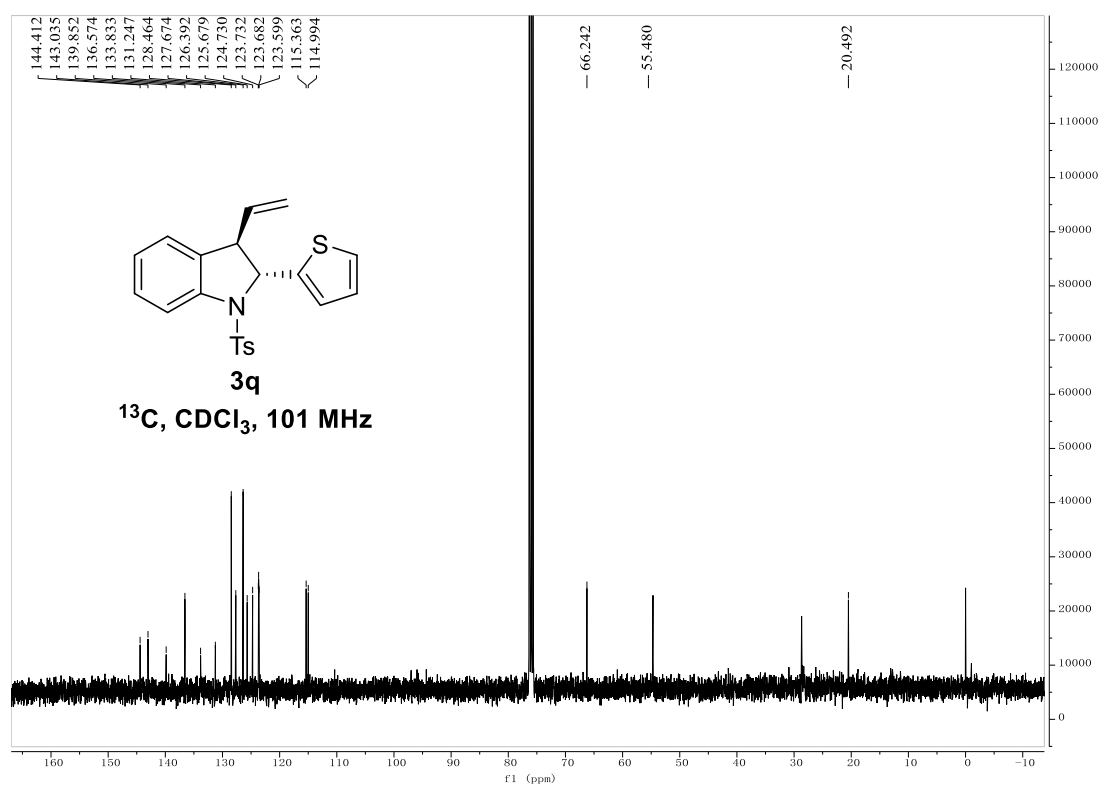

**(2*R*,3*R*)-2-(furan-2-yl)-1-tosyl-3-vinylindoline (3r)**

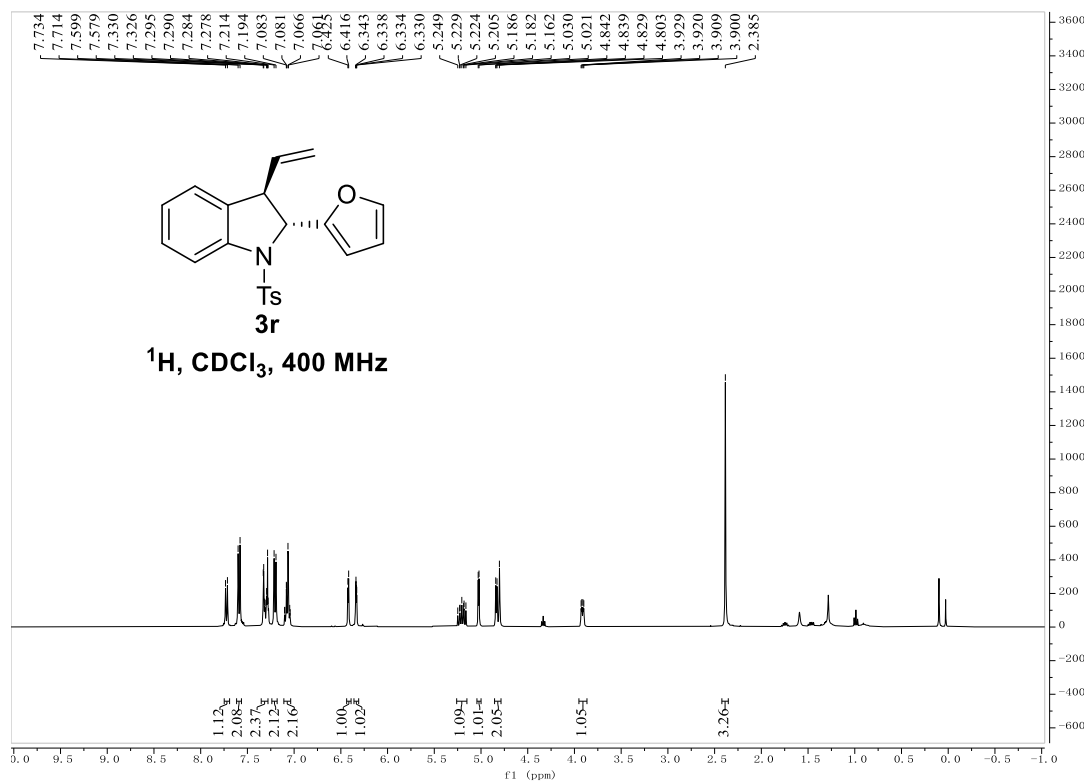

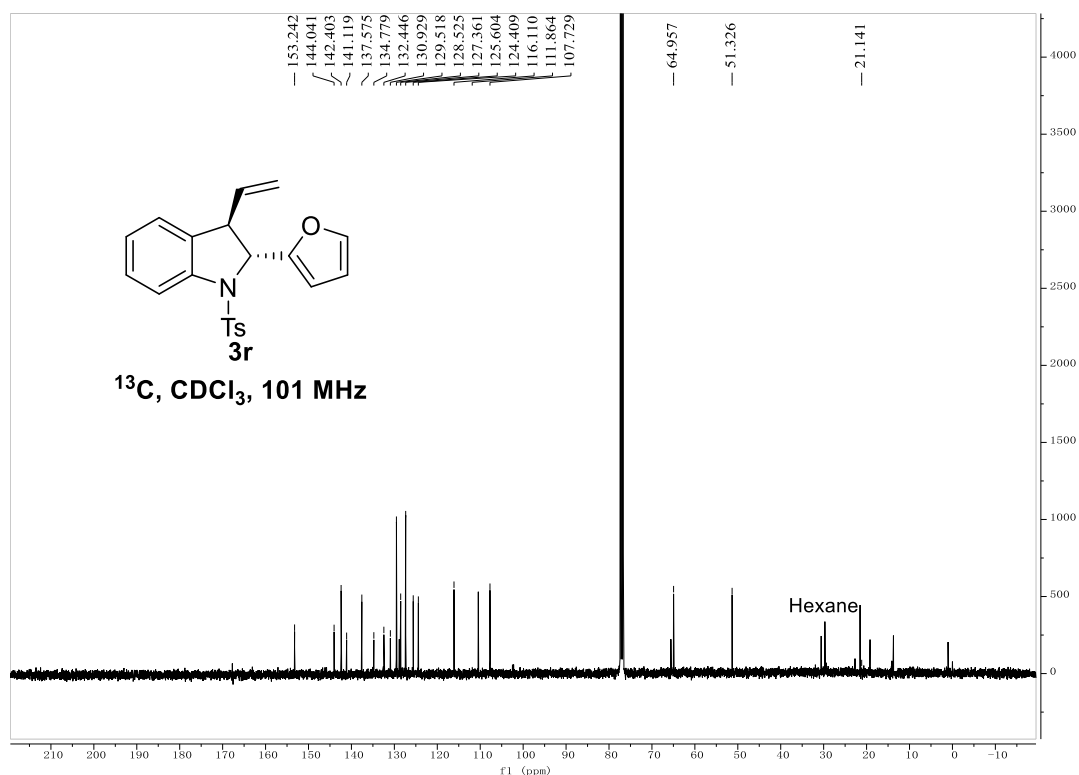

**(2*R*,3*R*)-6-fluoro-2-phenyl-1-tosyl-3-vinylindoline (3s)**

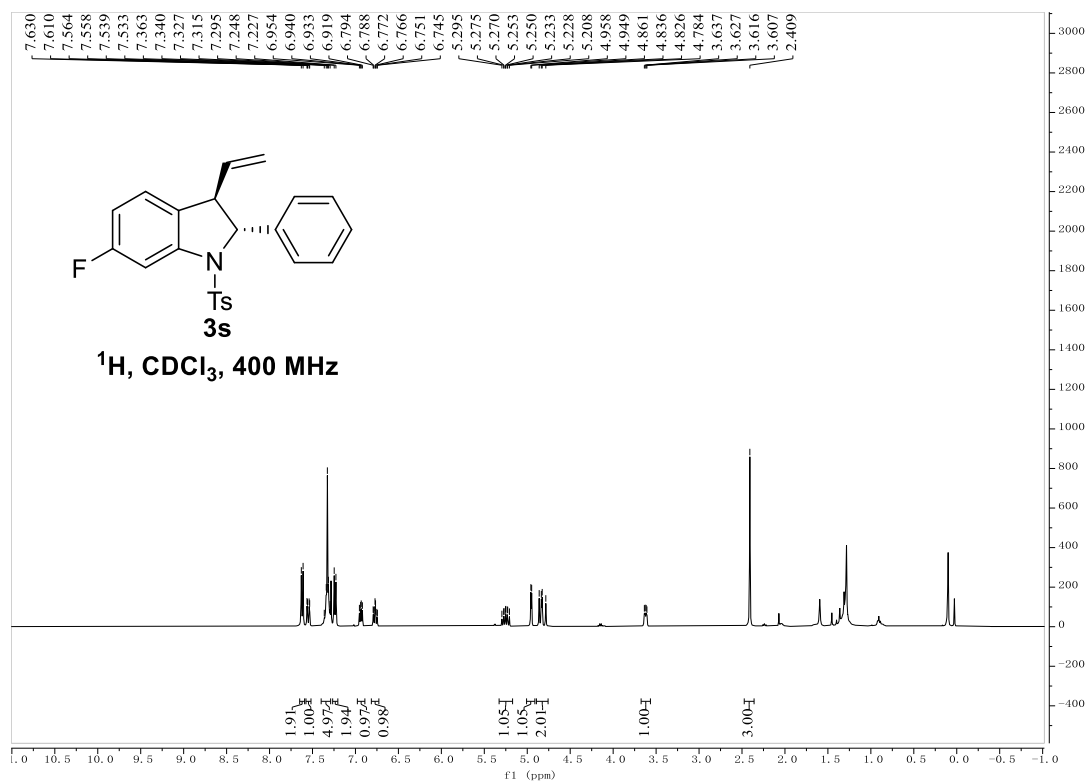

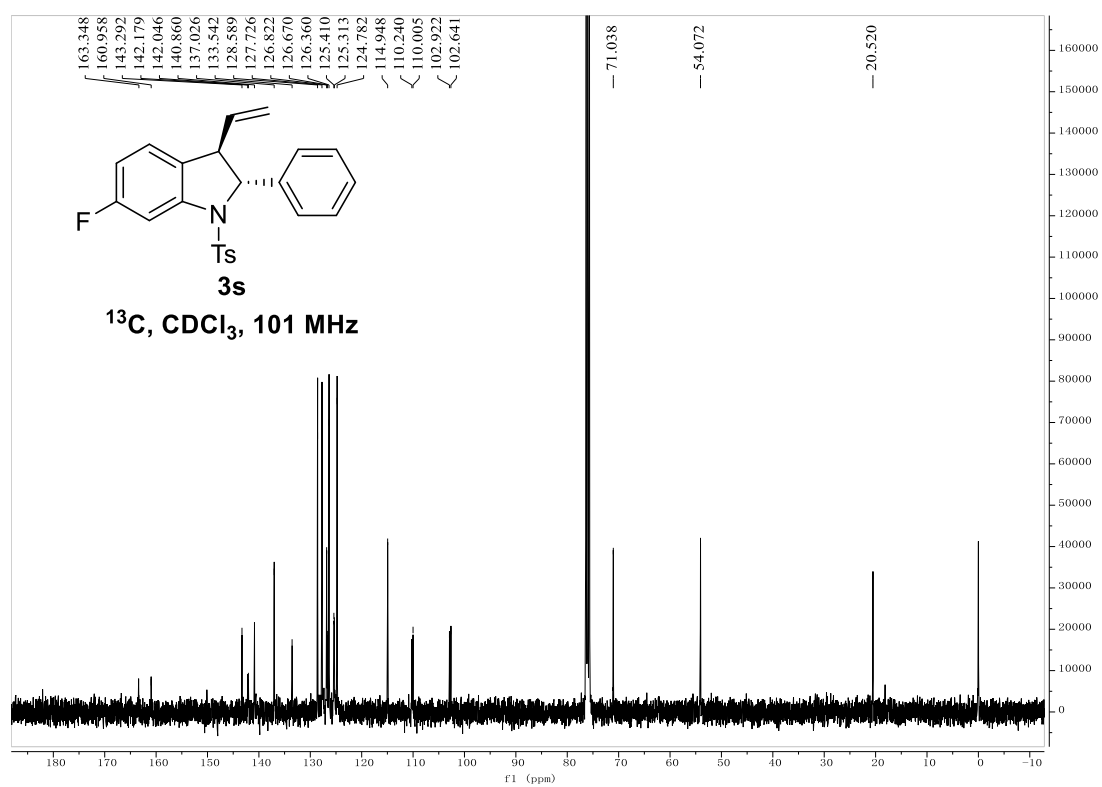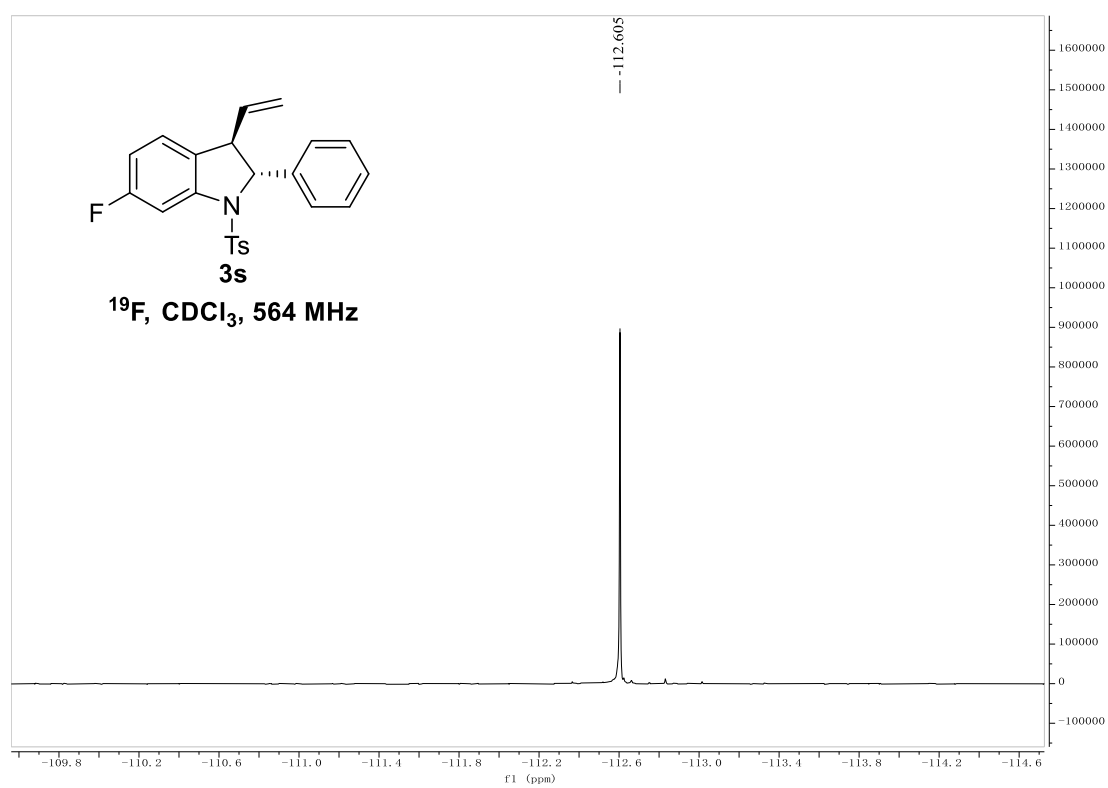

**(2*R*,3*R*)-6-bromo-2-phenyl-1-tosyl-3-vinylindoline (3t)**

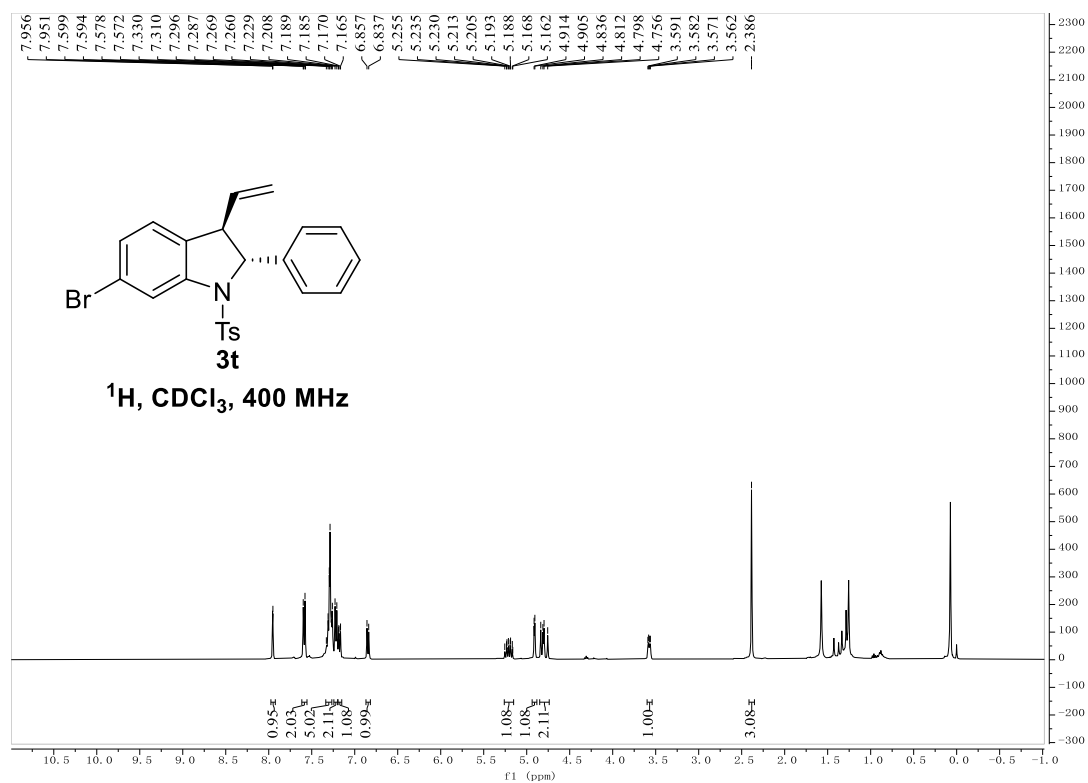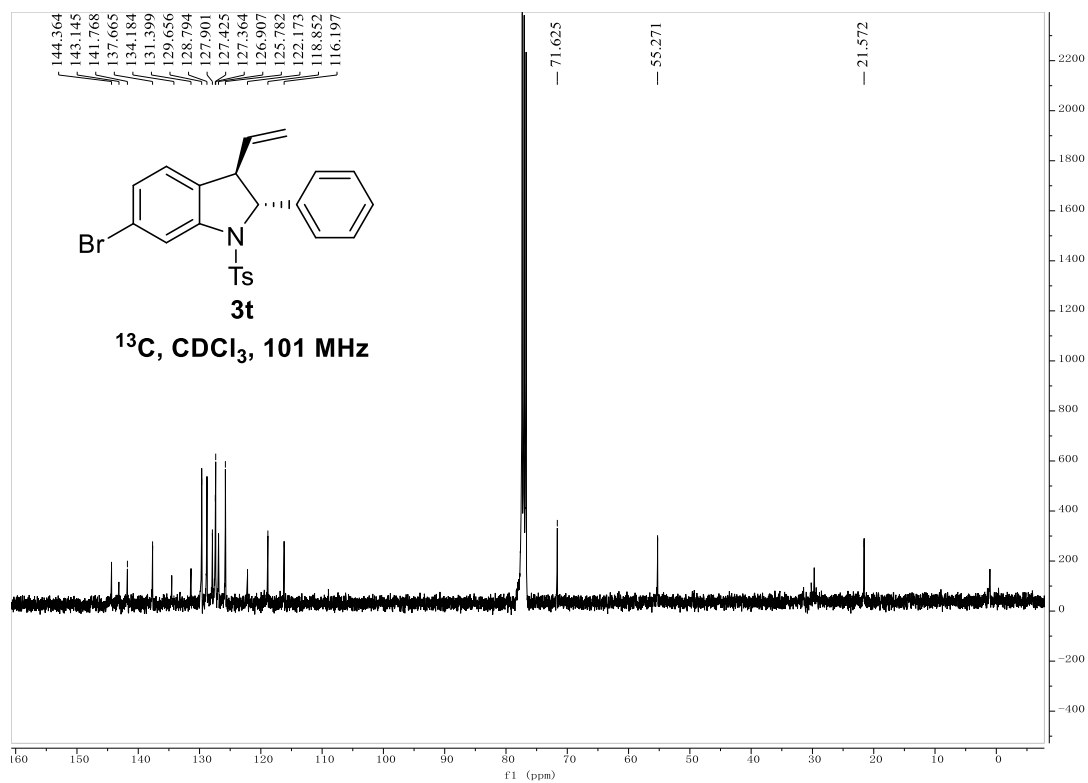

**(2*R*,3*R*)-5-methyl-2-phenyl-1-tosyl-3-vinylindoline (3u)**

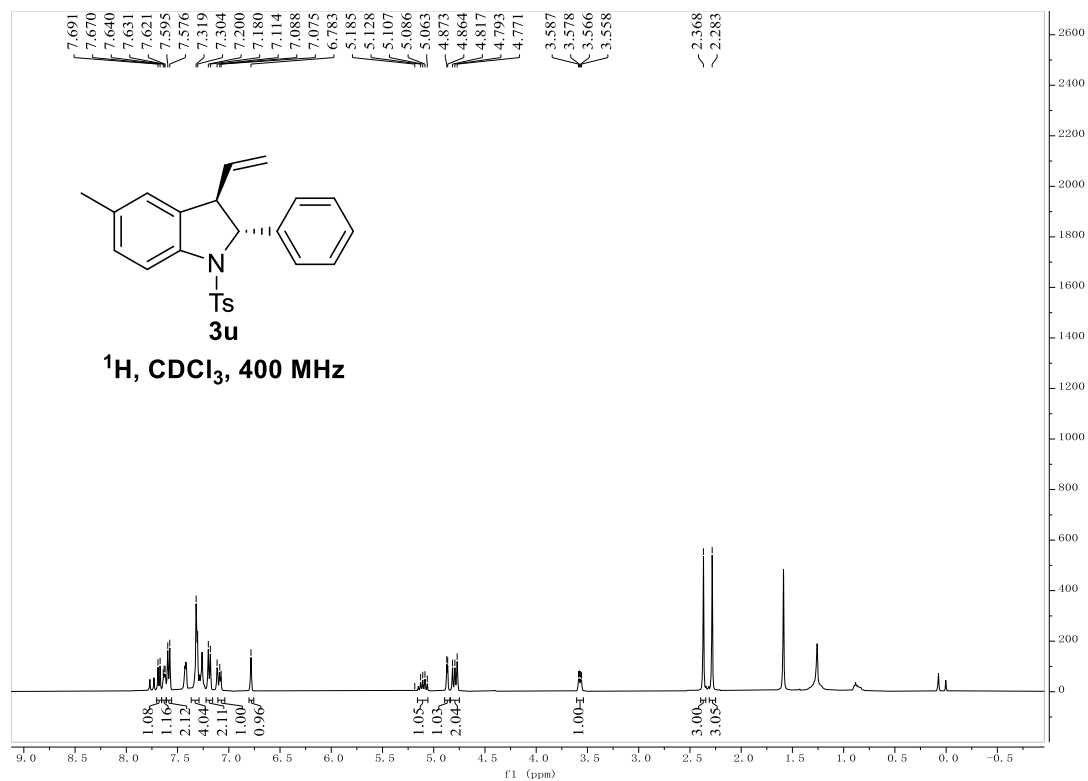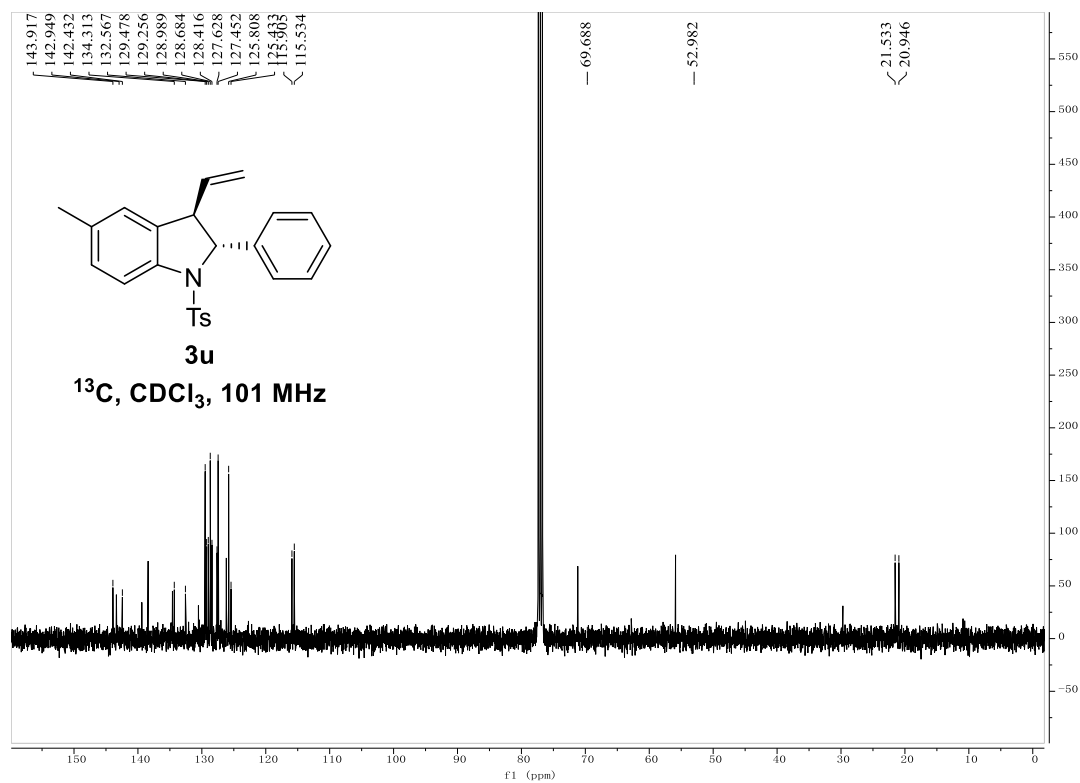

**(2*R*,3*R*)-5-chloro-2-phenyl-1-tosyl-3-vinylindoline (3v)**

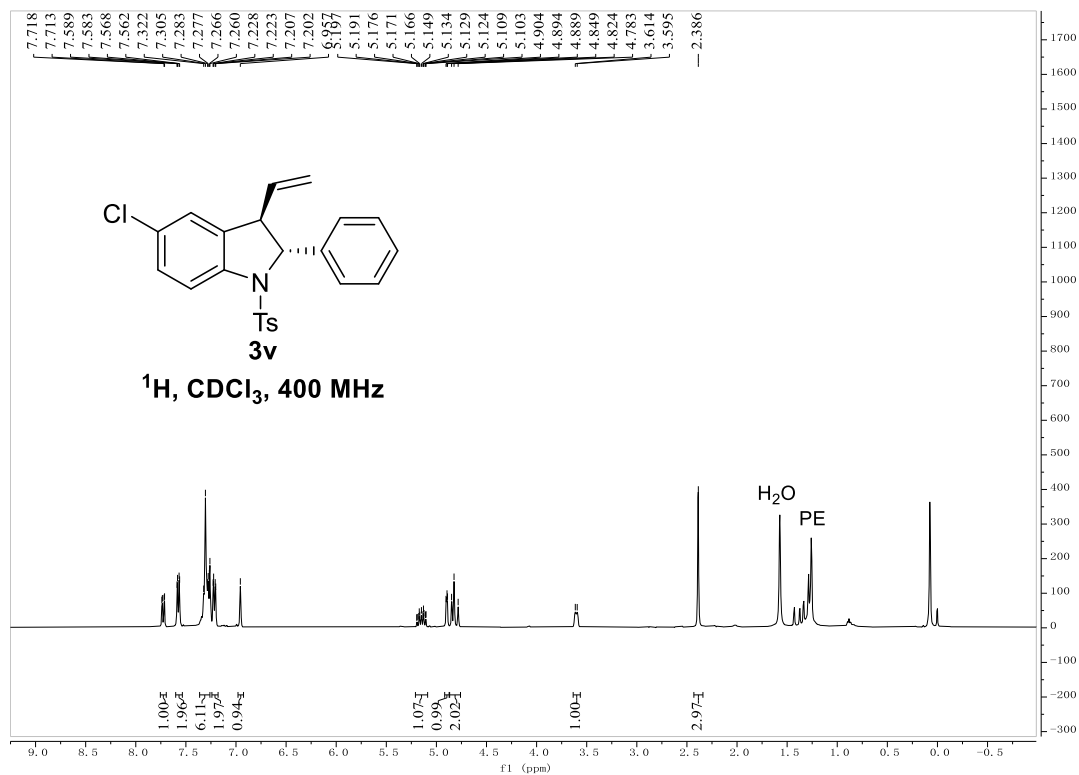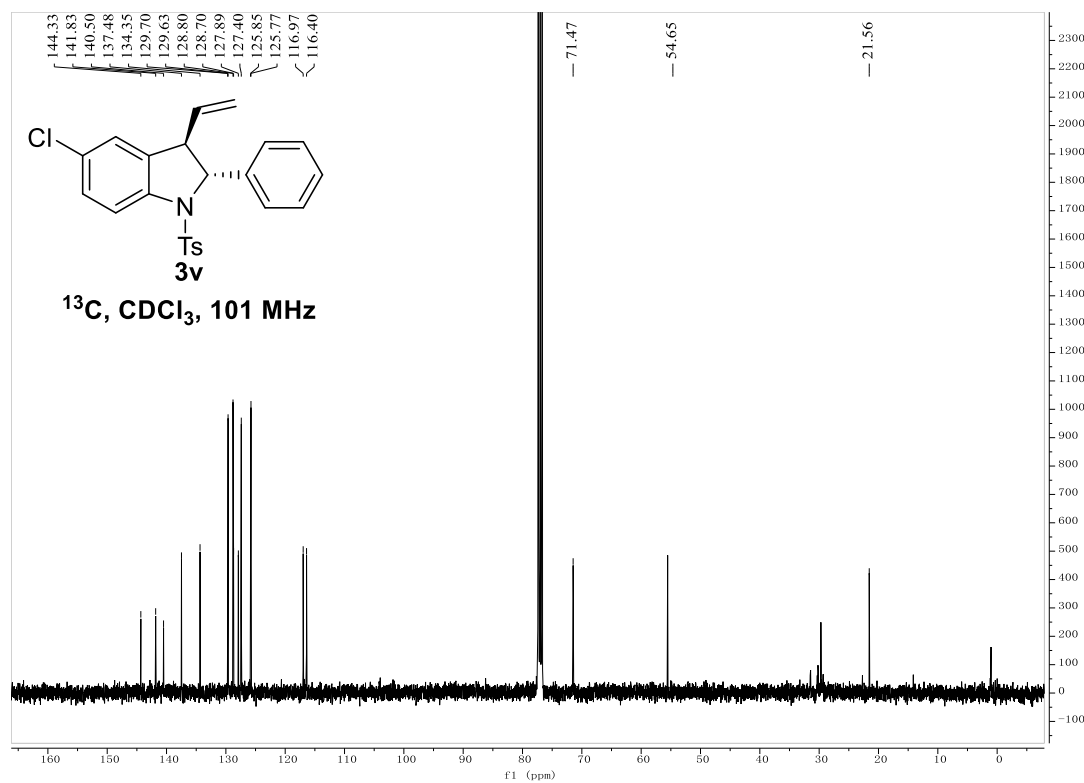



**(2*R*,3*R*)-4-methyl-2-phenyl-1-tosyl-3-vinylindoline (3w)**

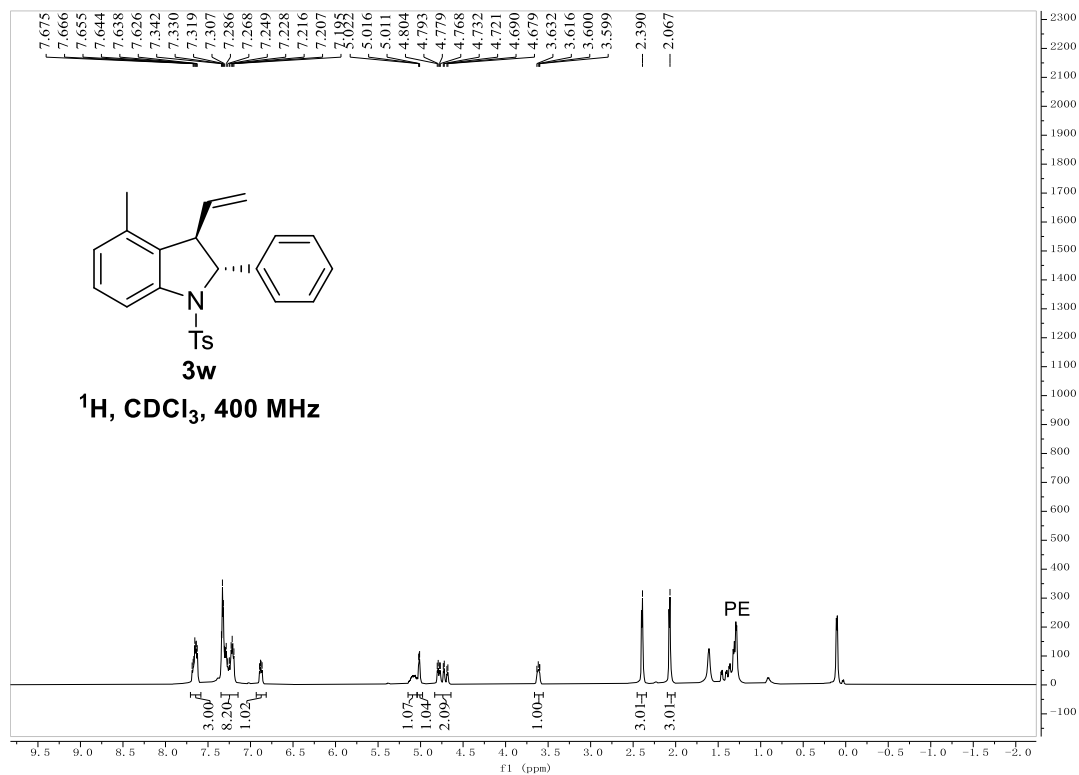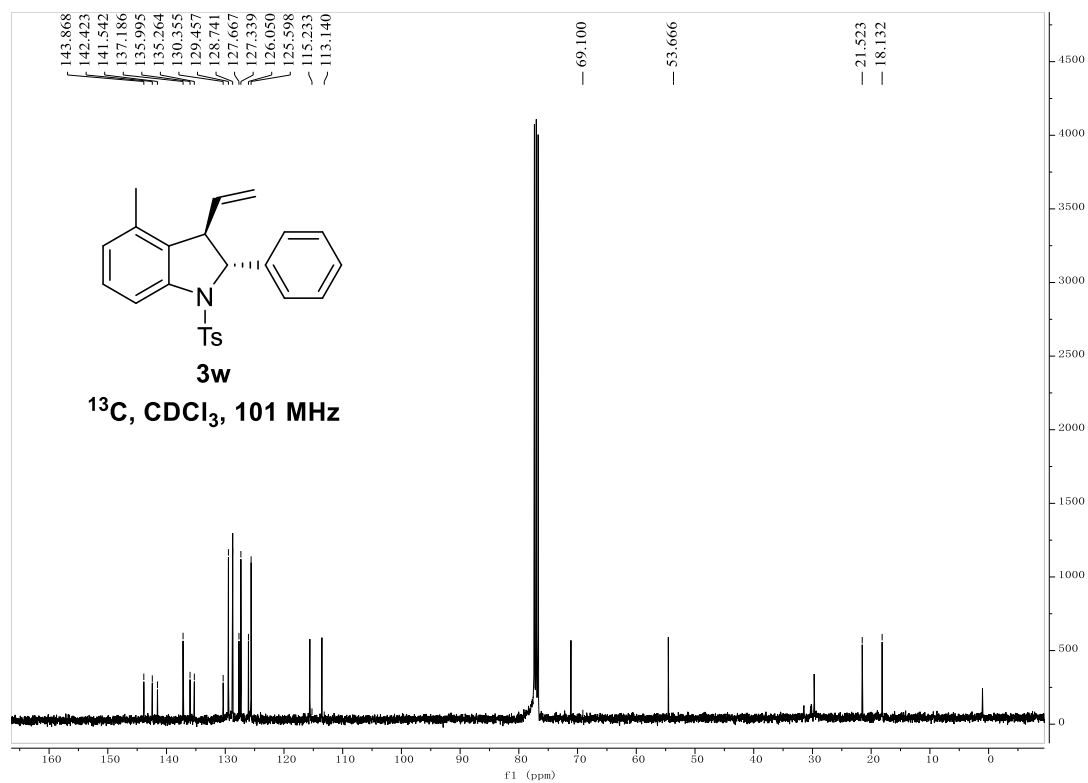

**(2*R*,3*R*)-4-chloro-2-phenyl-1-tosyl-3-vinylindoline (3x)**

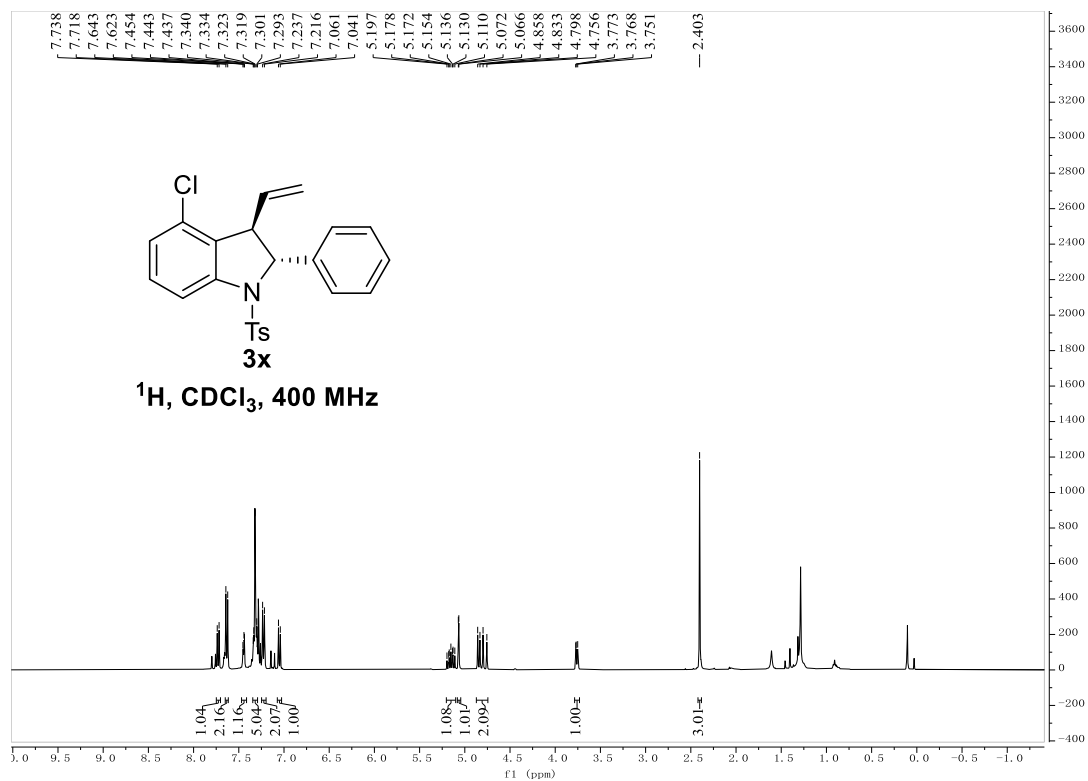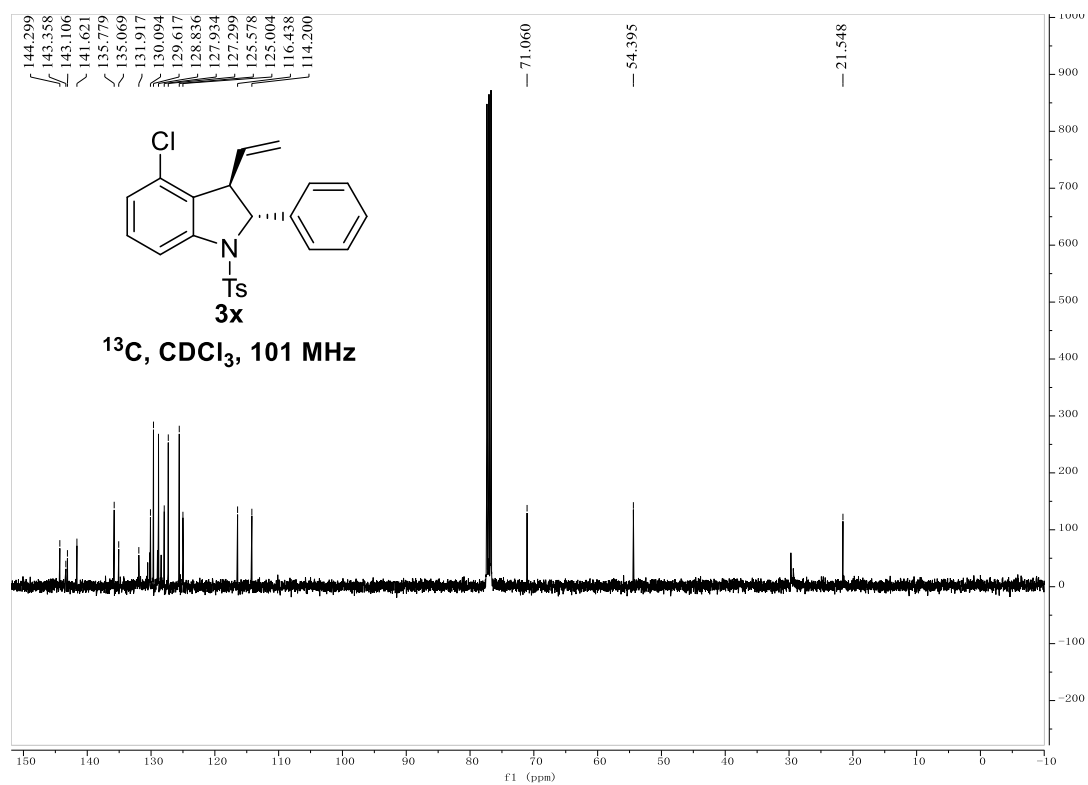

**(2*R*,3*R*)-3-ethyl-2-phenyl-1-tosylindoline (4a)**

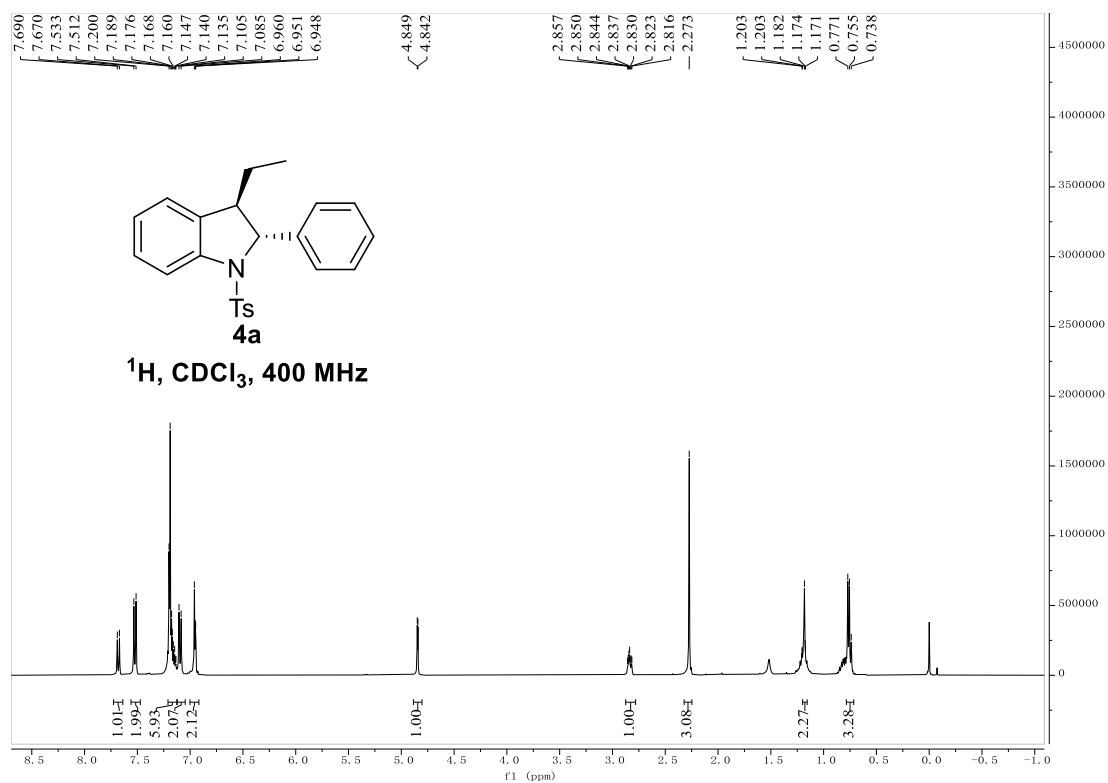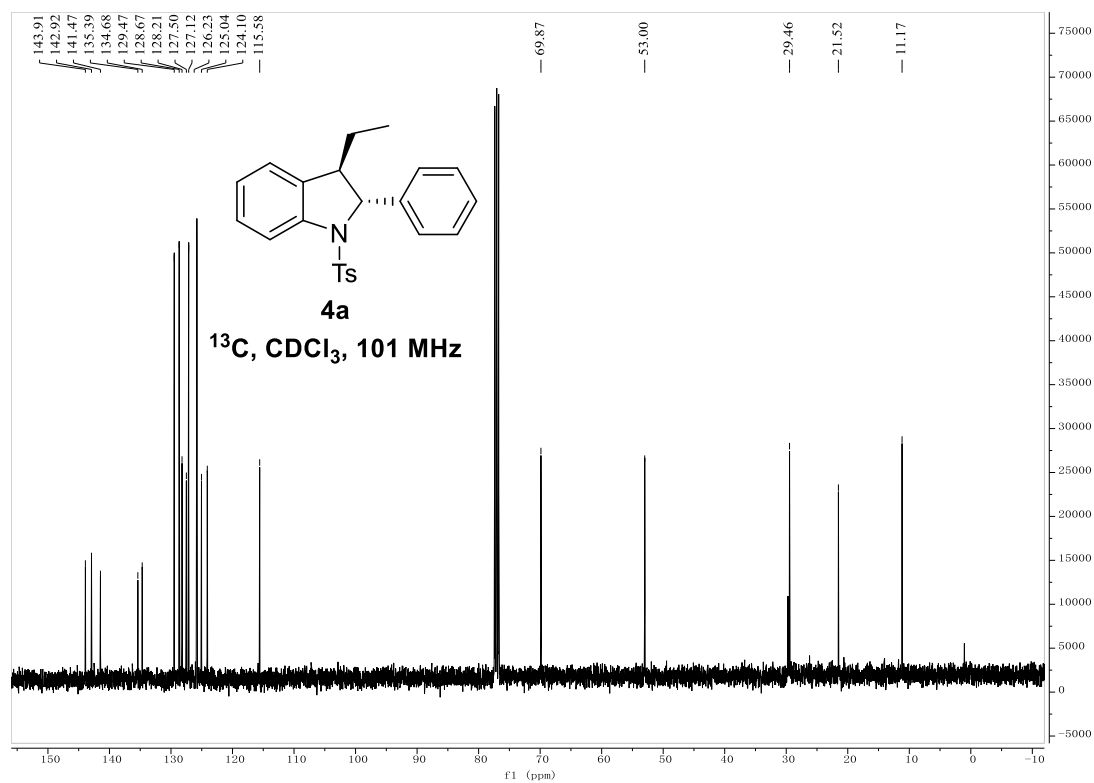

**(2*R*,3*R*)-2-(4'-methoxy-[1,1'-biphenyl]-4-yl)-1-tosyl-3-vinylindoline (4b)**

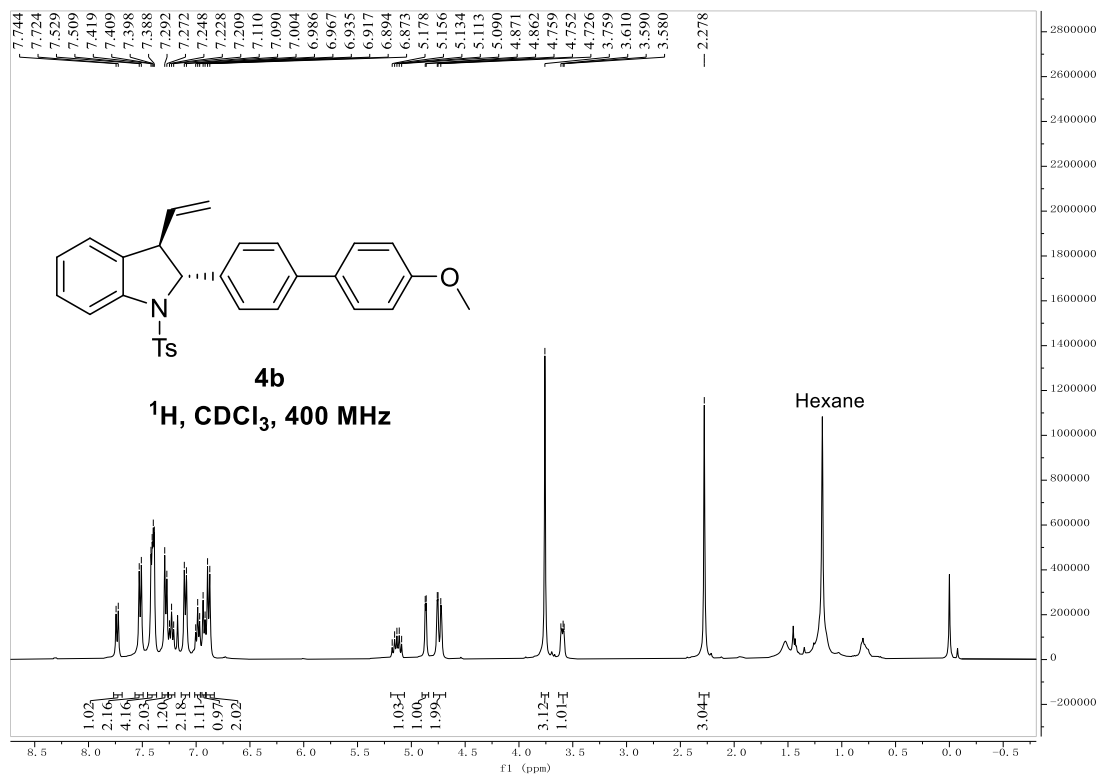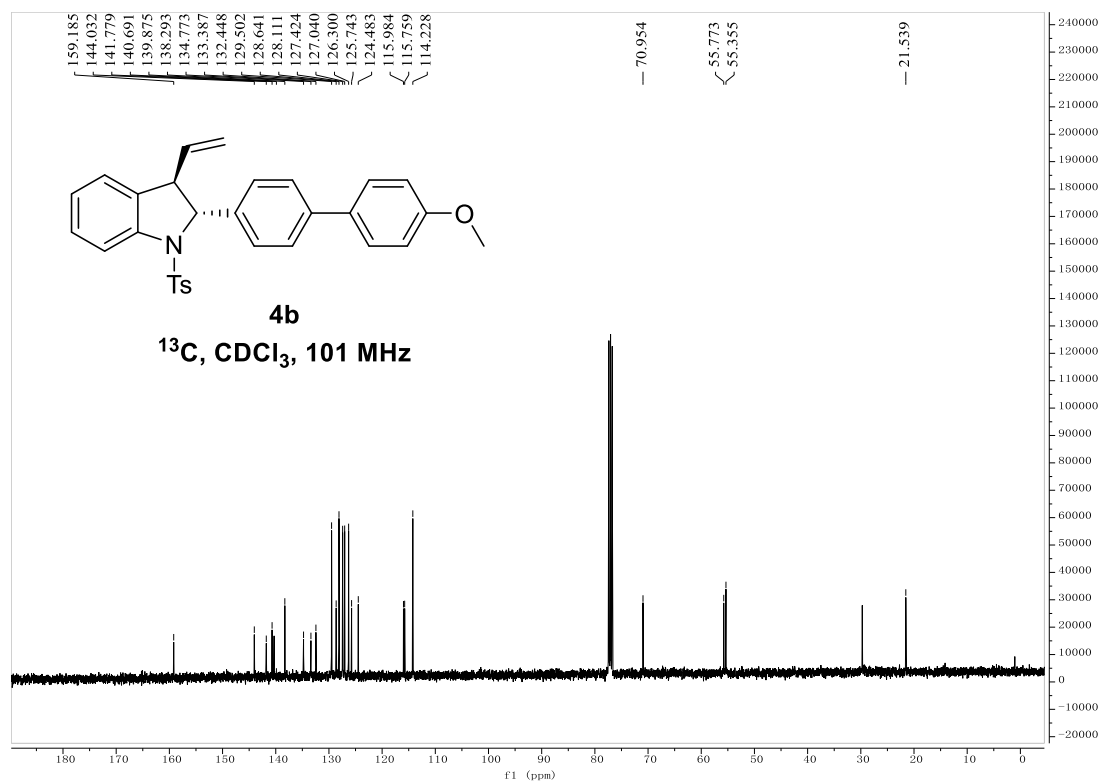

**1-((2*R*,3*R*)-2-(4-bromophenyl)-1-tosylindolin-3-yl)ethane-1,2-diol (**4c**)**

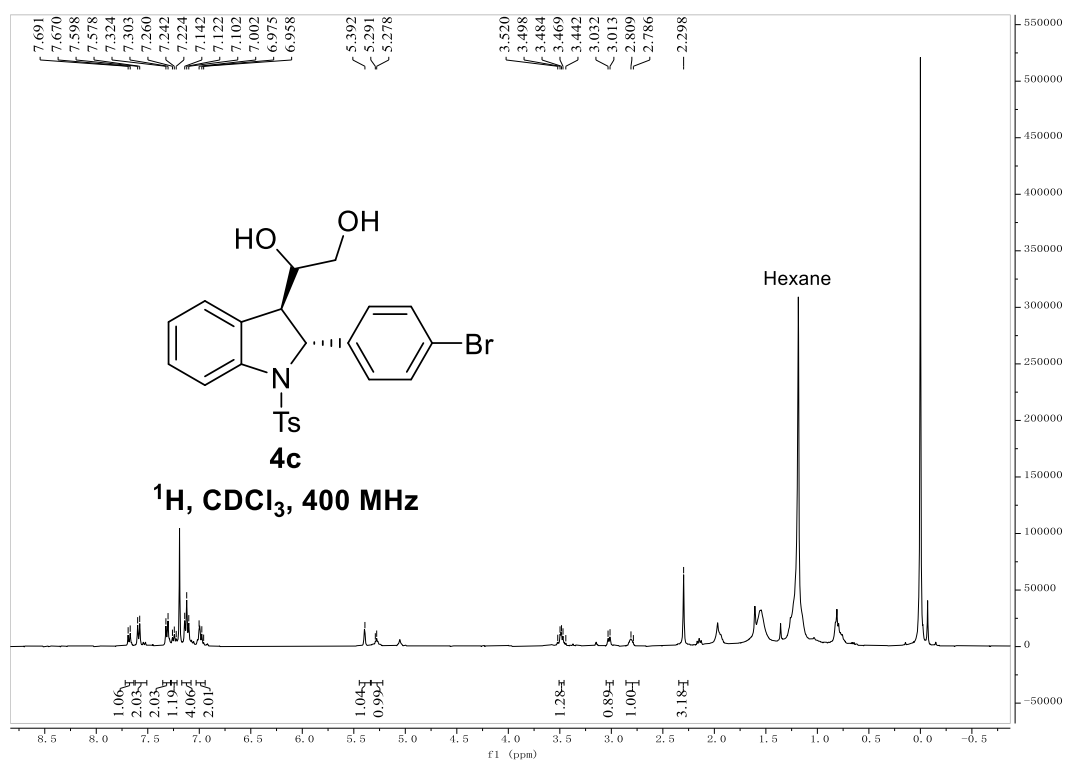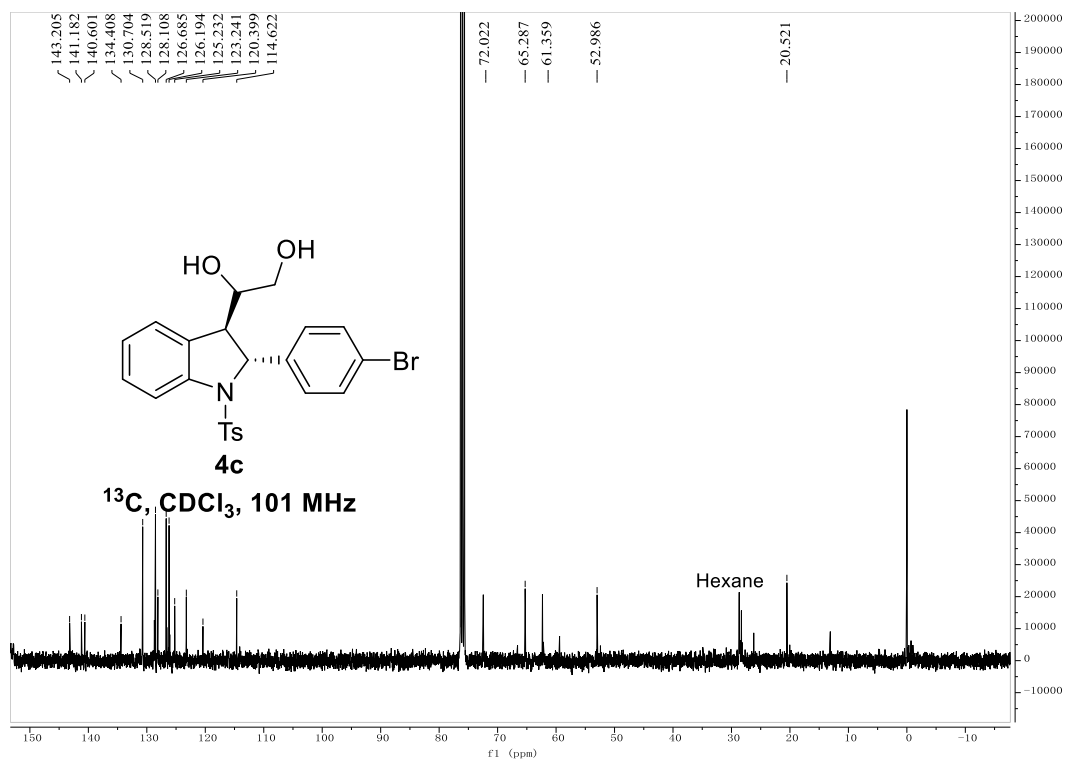

## 11. HPLC analysis

### (2*R*,3*R*)-2-phenyl-1-tosyl-3-vinylindoline (3a)

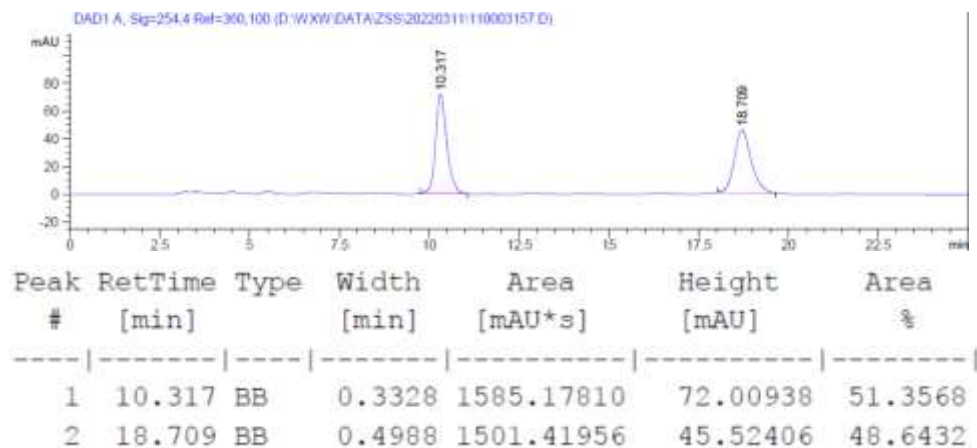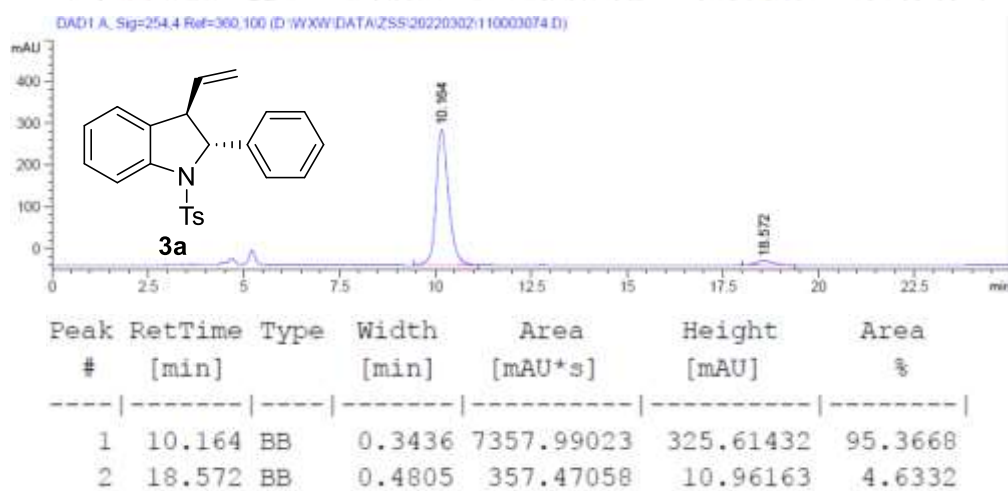

### (2*R*,3*R*)-2-(*p*-tolyl)-1-tosyl-3-vinylindoline (3b)

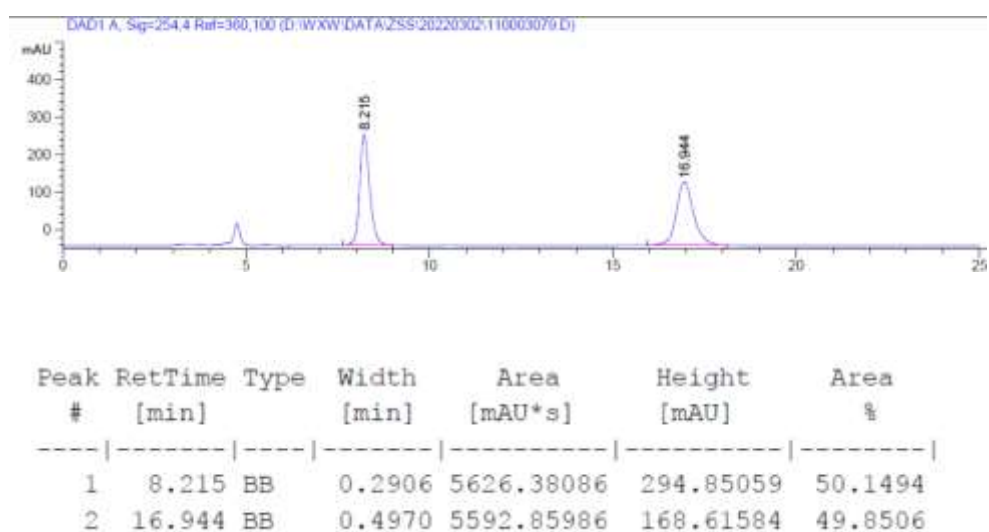

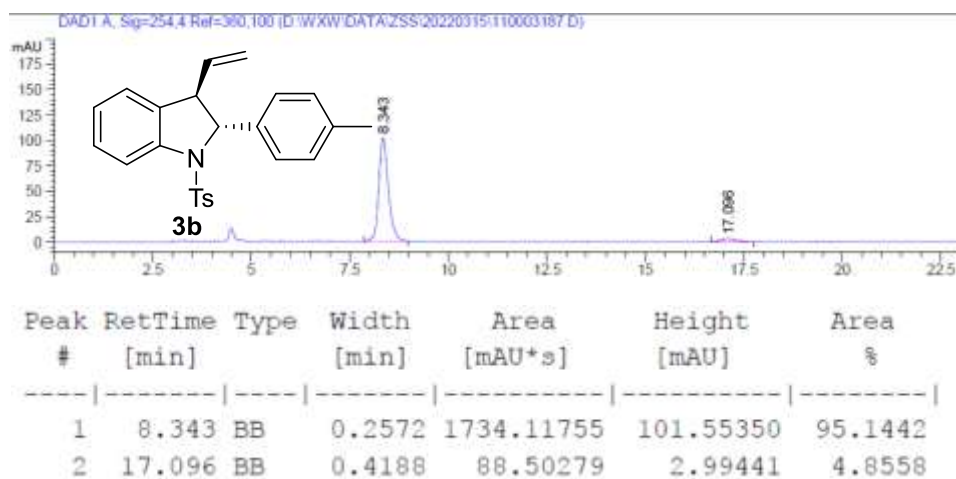

**(2*R*,3*R*)-2-(4-ethylphenyl)-1-tosyl-3-vinylindoline (3c)**

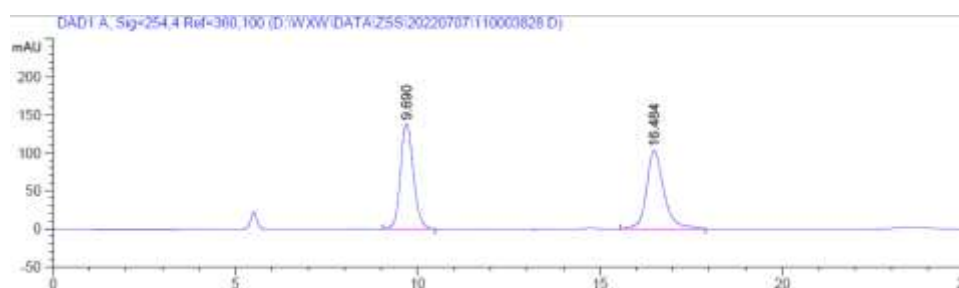

| Peak # | RetTime [min] | Type | Width [min] | Area [mAU*s] | Height [mAU] | Area %  |
|--------|---------------|------|-------------|--------------|--------------|---------|
| 1      | 9.690         | BB   | 0.3838      | 3429.79614   | 139.03056    | 49.9244 |
| 2      | 16.484        | BB   | 0.4911      | 3440.19043   | 103.69138    | 50.0756 |

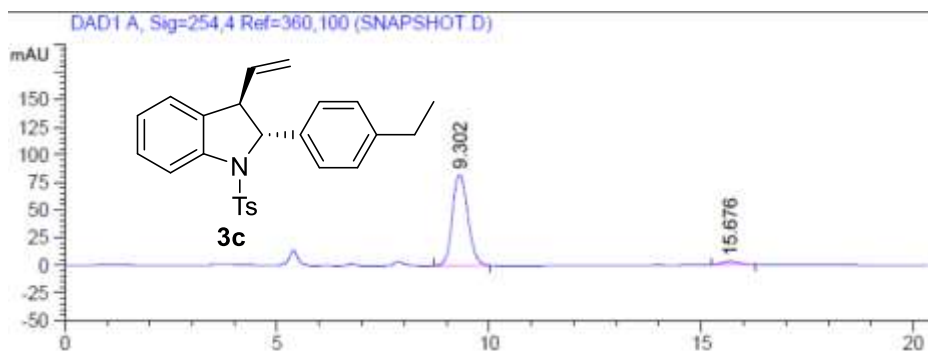

| Peak # | RetTime [min] | Type | Width [min] | Area [mAU*s] | Height [mAU] | Area %  |
|--------|---------------|------|-------------|--------------|--------------|---------|
| 1      | 9.302         | BB   | 0.4011      | 2101.55420   | 82.51653     | 96.4430 |
| 2      | 15.676        | BB   | 0.3939      | 77.50844     | 2.82654      | 3.5570  |

**(2*R*,3*R*)-2-(4-isopropylphenyl)-1-tosyl-3-vinylindoline (3d)**

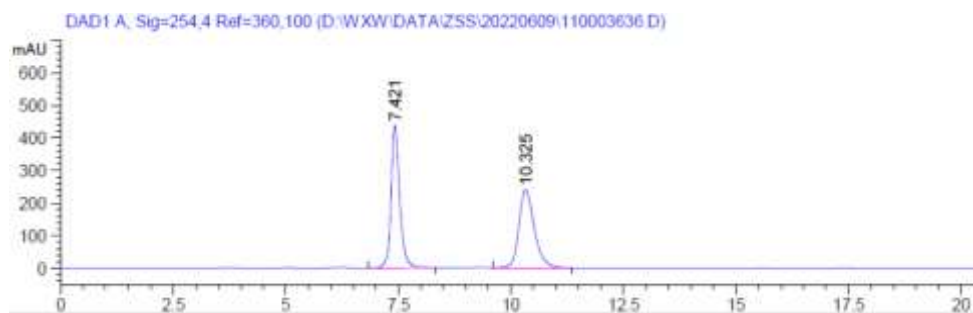

| Peak # | RetTime [min] | Type | Width [min] | Area [mAU*s] | Height [mAU] | Area %  |
|--------|---------------|------|-------------|--------------|--------------|---------|
| 1      | 7.421         | BB   | 0.2002      | 5852.98730   | 437.08771    | 50.2761 |
| 2      | 10.325        | VB   | 0.3679      | 5788.70703   | 239.55563    | 49.7239 |

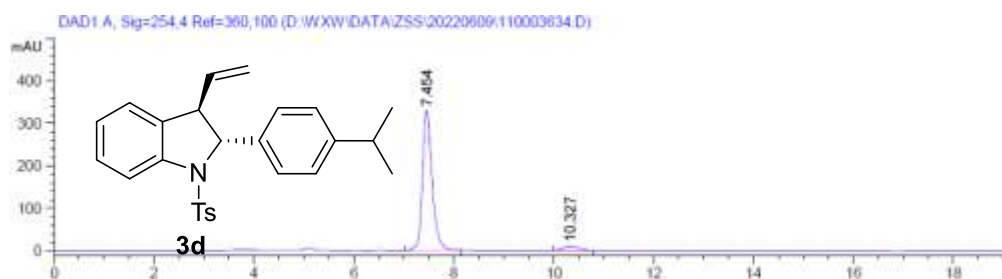

| Peak # | RetTime [min] | Type | Width [min] | Area [mAU*s] | Height [mAU] | Area %  |
|--------|---------------|------|-------------|--------------|--------------|---------|
| 1      | 7.454         | BB   | 0.2035      | 4460.32031   | 330.32062    | 95.0328 |
| 2      | 10.327        | MM R | 0.3667      | 233.13147    | 10.59655     | 4.9672  |

**(2*R*,3*R*)-2-(4-(*tert*-butyl)phenyl)-1-tosyl-3-vinylindoline (3e)**

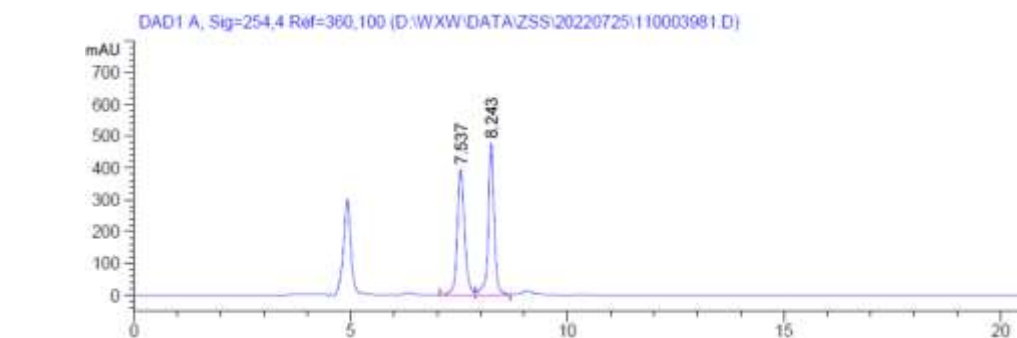

| Peak # | RetTime [min] | Type | Width [min] | Area [mAU*s] | Height [mAU] | Area %  |
|--------|---------------|------|-------------|--------------|--------------|---------|
| 1      | 7.537         | VV   | 0.1776      | 4662.08984   | 395.25165    | 50.2194 |
| 2      | 8.243         | VV   | 0.1451      | 4621.36133   | 476.49939    | 49.7806 |



DAD1 A, Sig=254,4 Ref=360,100 (D:\WXW\DATA\ZSS\20220725\110003979.D)

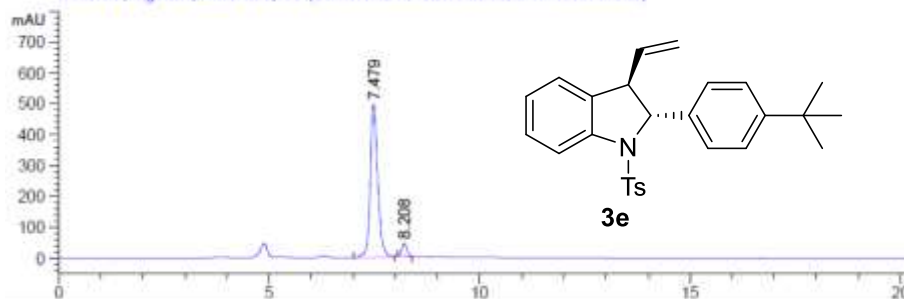

| Peak # | RetTime [min] | Type | Width [min] | Area [mAU*s] | Height [mAU] | Area %  |
|--------|---------------|------|-------------|--------------|--------------|---------|
| 1      | 7.479         | BB   | 0.1858      | 6114.15479   | 495.87891    | 94.5317 |
| 2      | 8.208         | MM R | 0.1433      | 353.68399    | 41.12835     | 5.4683  |

**(2R,3R)-2-(4-methoxyphenyl)-1-tosyl-3-vinylindoline (3f)**

DAD1 A, Sig=254,4 Ref=360,100 (D:\WXW\DATA\ZSS\20220629\110003760.D)

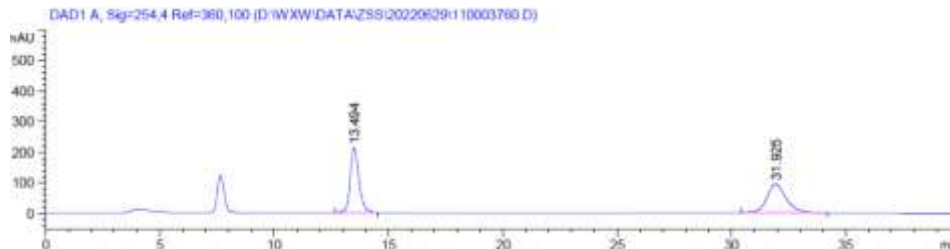

| Peak # | RetTime [min] | Type | Width [min] | Area [mAU*s] | Height [mAU] | Area %  |
|--------|---------------|------|-------------|--------------|--------------|---------|
| 1      | 13.494        | BB   | 0.4046      | 5713.43066   | 213.24898    | 50.7554 |
| 2      | 31.925        | MM R | 0.9775      | 5543.36084   | 94.52052     | 49.2446 |

DAD1 A, Sig=254,4 Ref=360,100 (D:\WXW\DATA\ZSS\20220627\110003750.D)

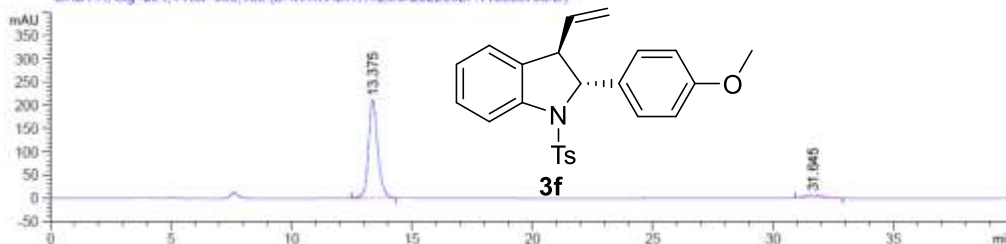

| Peak # | RetTime [min] | Type | Width [min] | Area [mAU*s] | Height [mAU] | Area %  |
|--------|---------------|------|-------------|--------------|--------------|---------|
| 1      | 13.375        | MM R | 0.4434      | 5635.15820   | 211.83868    | 94.2314 |
| 2      | 31.645        | BB   | 0.6595      | 344.97128    | 6.64739      | 5.7686  |

**(2R,3R)-2-(4-fluorophenyl)-1-tosyl-3-vinylindoline (3g)**

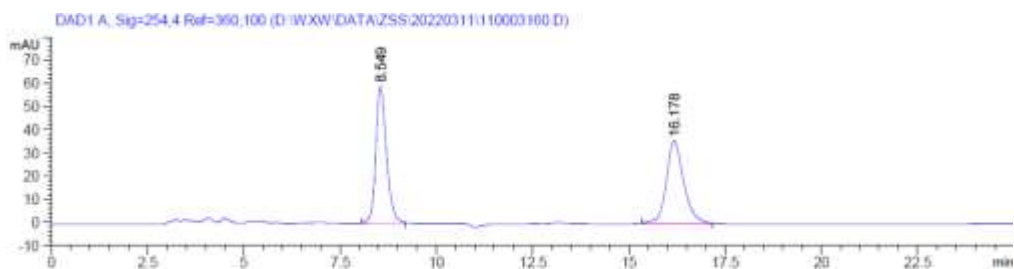

| Peak # | RetTime [min] | Type | Width [min] | Area [mAU*s] | Height [mAU] | Area %  |
|--------|---------------|------|-------------|--------------|--------------|---------|
| 1      | 8.549         | BB   | 0.2927      | 1139.11401   | 59.13330     | 50.4415 |
| 2      | 16.178        | MM R | 0.5231      | 1119.17529   | 35.66105     | 49.5585 |

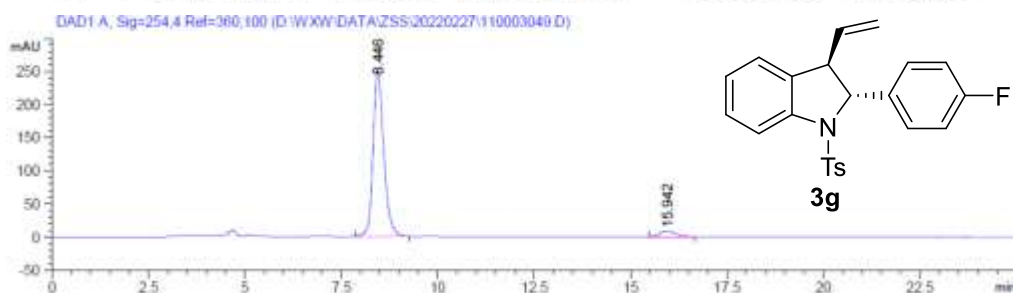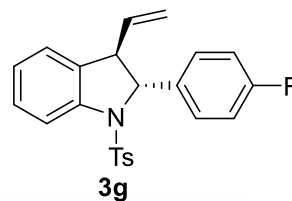

| Peak # | RetTime [min] | Type | Width [min] | Area [mAU*s] | Height [mAU] | Area %  |
|--------|---------------|------|-------------|--------------|--------------|---------|
| 1      | 8.446         | BB   | 0.2966      | 4852.62744   | 249.85382    | 95.3624 |
| 2      | 15.942        | BB   | 0.4272      | 235.98837    | 8.31376      | 4.6376  |

**(2R,3R)-2-(4-chlorophenyl)-1-tosyl-3-vinylindoline (3h)**

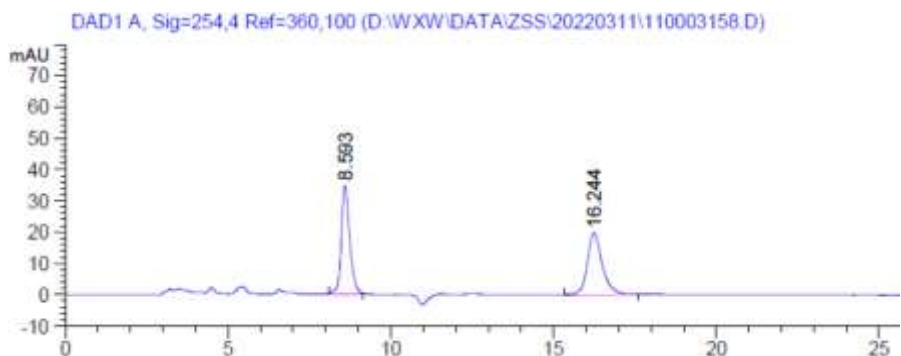

| Peak # | RetTime [min] | Type | Width [min] | Area [mAU*s] | Height [mAU] | Area %  |
|--------|---------------|------|-------------|--------------|--------------|---------|
| 1      | 8.593         | BB   | 0.2741      | 630.80493    | 34.70299     | 49.2547 |
| 2      | 16.244        | MM R | 0.5477      | 649.89423    | 19.77561     | 50.7453 |

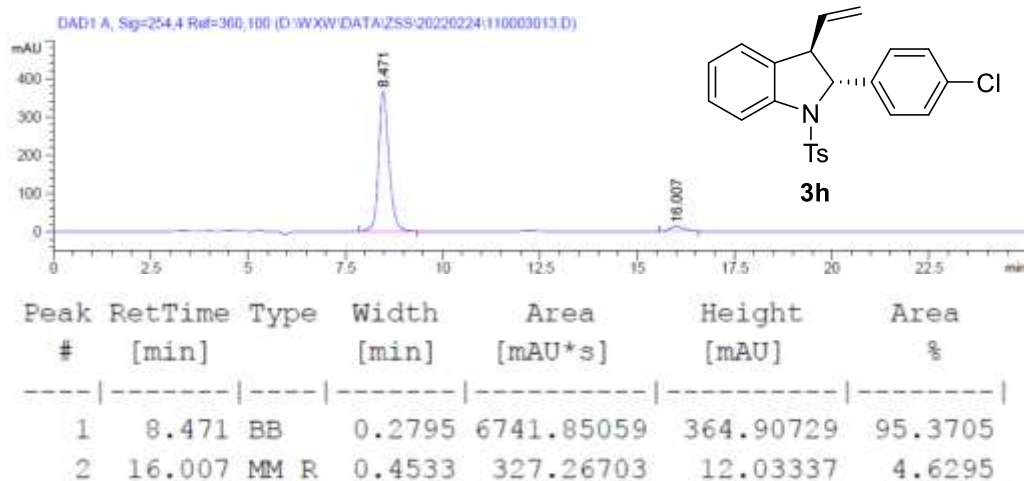

**(2R,3R)-2-(4-bromophenyl)-1-tosyl-3-vinylindoline (3i)**

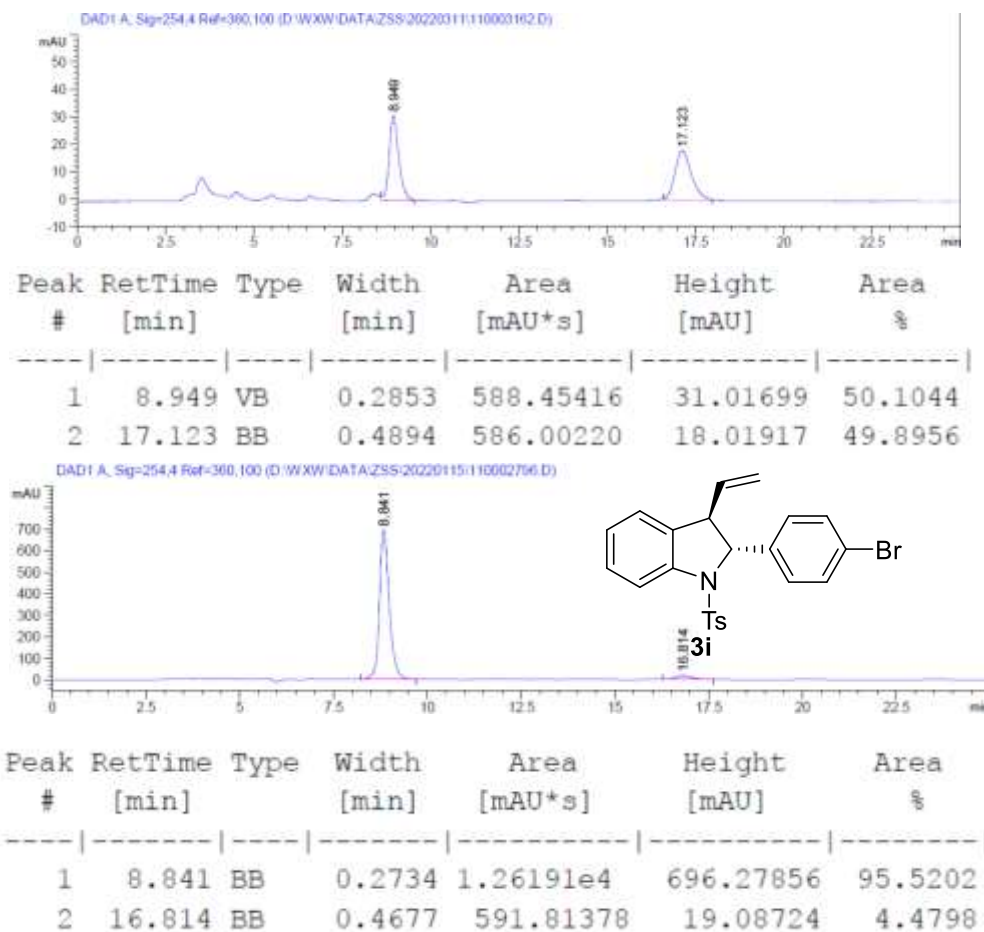

**(2R,3R)-2-(4-iodophenyl)-1-tosyl-3-vinylindoline (3j)**

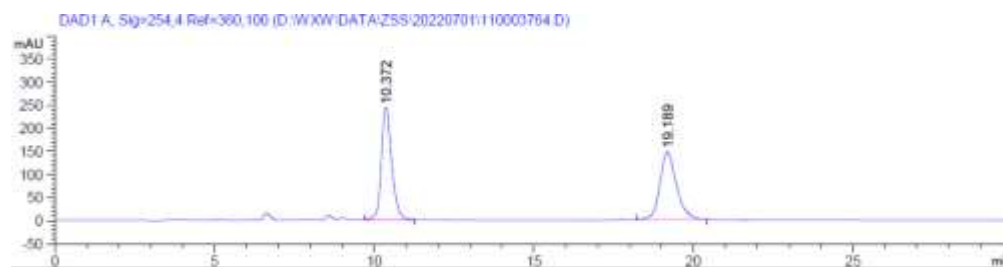

| Peak # | RetTime [min] | Type | Width [min] | Area [mAU*s] | Height [mAU] | Area %  |
|--------|---------------|------|-------------|--------------|--------------|---------|
| 1      | 10.372        | BB   | 0.3443      | 5455.82227   | 242.68387    | 50.7596 |
| 2      | 19.189        | BB   | 0.5458      | 5292.52783   | 146.38052    | 49.2404 |

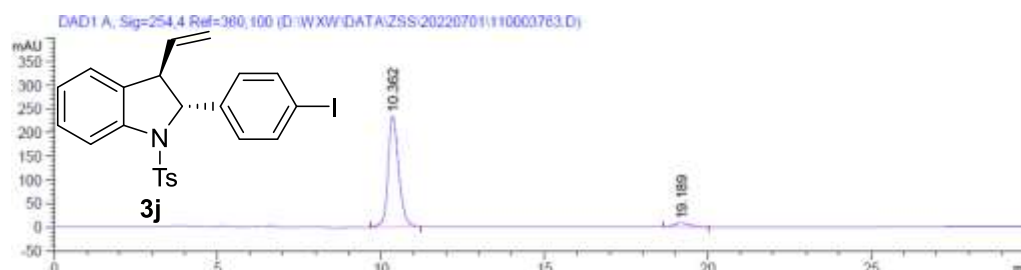

| Peak # | RetTime [min] | Type | Width [min] | Area [mAU*s] | Height [mAU] | Area %  |
|--------|---------------|------|-------------|--------------|--------------|---------|
| 1      | 10.362        | BB   | 0.3436      | 5280.59961   | 233.70644    | 94.9877 |
| 2      | 19.189        | BB   | 0.4992      | 278.64383    | 8.14332      | 5.0123  |

**(2R,3R)-1-tosyl-2-(4-(trifluoromethyl)phenyl)-3-vinylindoline (3k)**

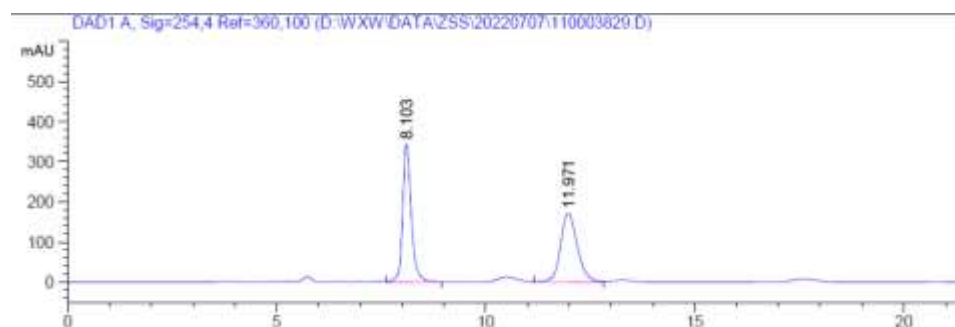

| Peak # | RetTime [min] | Type | Width [min] | Area [mAU*s] | Height [mAU] | Area %  |
|--------|---------------|------|-------------|--------------|--------------|---------|
| 1      | 8.103         | VB   | 0.2133      | 4945.30225   | 344.84058    | 50.6083 |
| 2      | 11.971        | VB   | 0.4310      | 4826.41748   | 172.17607    | 49.3917 |

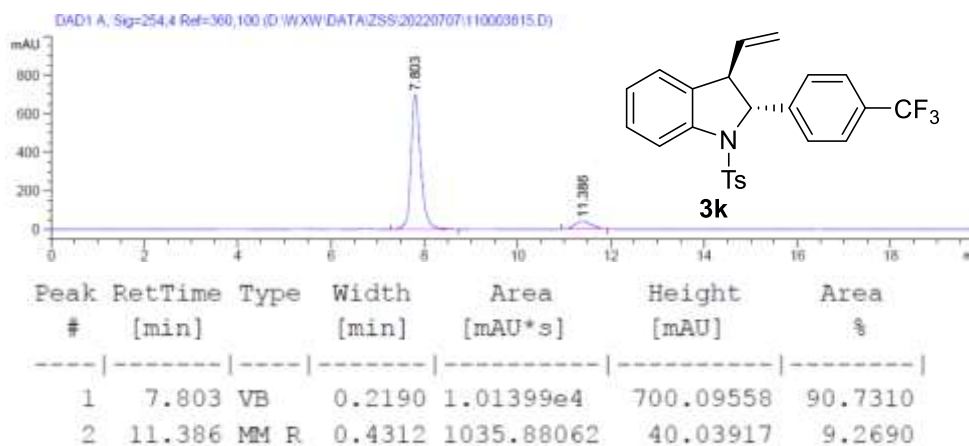

**(2*R*,3*R*)-2-(*m*-tolyl)-1-tosyl-3-vinylindoline (3l)**

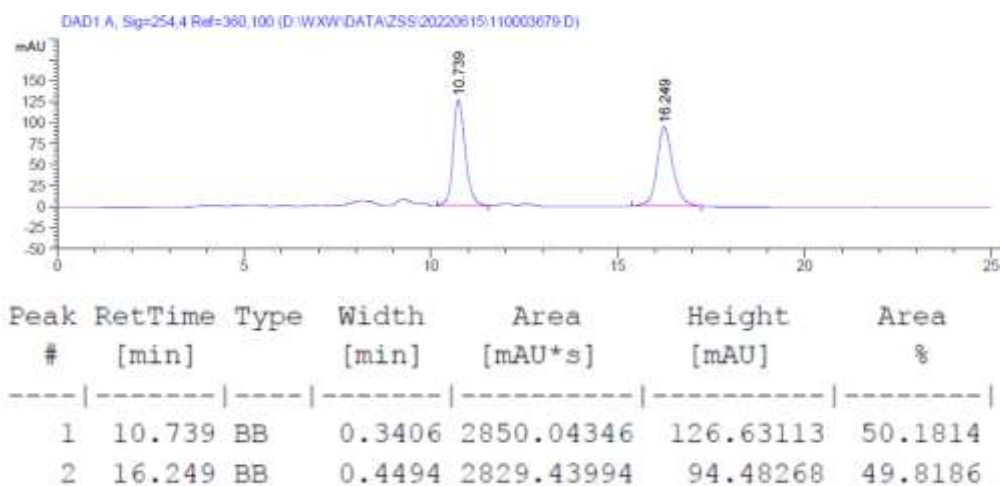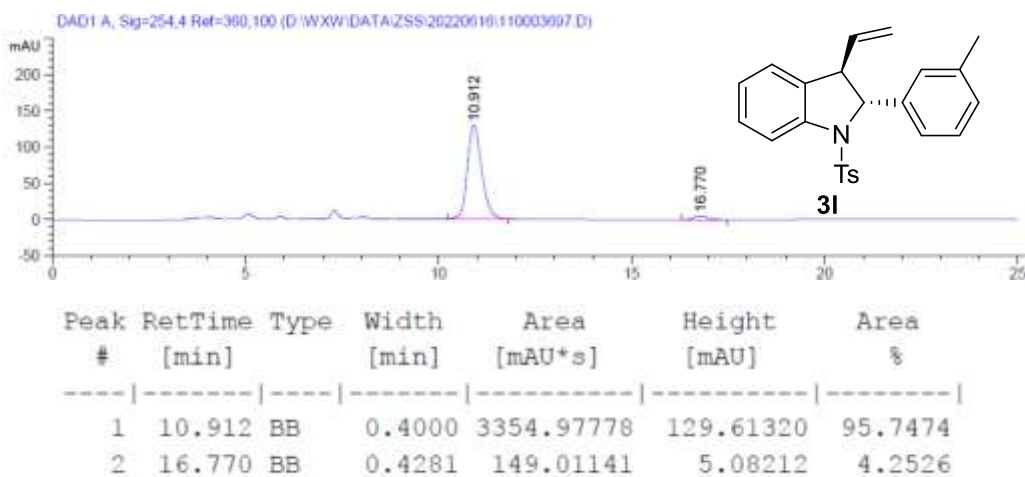

**(2*R*,3*R*)-2-(3-bromophenyl)-1-tosyl-3-vinylindoline (3m)**

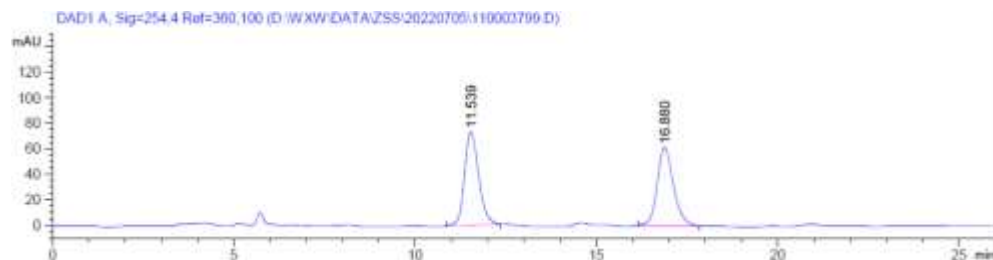

| Peak # | RetTime [min] | Type | Width [min] | Area [mAU*s] | Height [mAU] | Area %  |
|--------|---------------|------|-------------|--------------|--------------|---------|
| 1      | 11.539        | BB   | 0.4159      | 1986.04688   | 73.33987     | 50.5219 |
| 2      | 16.880        | BB   | 0.4718      | 1945.01367   | 61.70187     | 49.4781 |

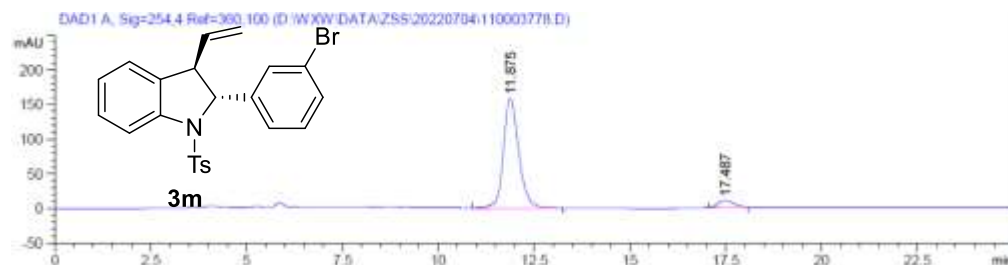

| Peak # | RetTime [min] | Type | Width [min] | Area [mAU*s] | Height [mAU] | Area %  |
|--------|---------------|------|-------------|--------------|--------------|---------|
| 1      | 11.875        | MM R | 0.4656      | 4438.21094   | 158.86264    | 93.8518 |
| 2      | 17.487        | MM R | 0.4752      | 290.74591    | 10.19701     | 6.1482  |

**(2*R*,3*R*)-2-(2-bromophenyl)-1-tosyl-3-vinylindoline (3n)**

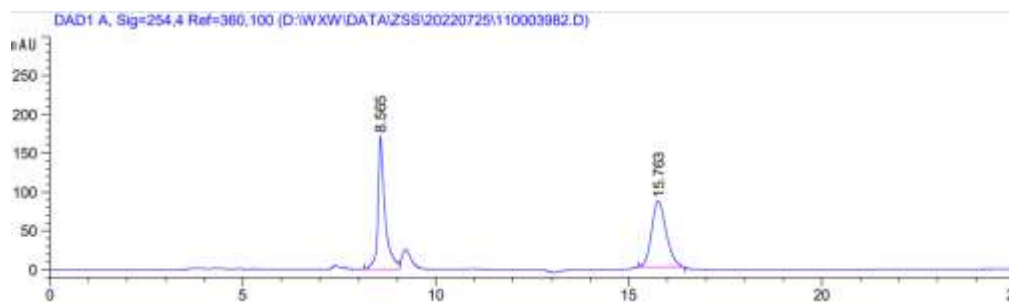

| Peak # | RetTime [min] | Type | Width [min] | Area [mAU*s] | Height [mAU] | Area %  |
|--------|---------------|------|-------------|--------------|--------------|---------|
| 1      | 8.565         | MF R | 0.2118      | 2167.82471   | 170.61145    | 49.1029 |
| 2      | 15.763        | MM R | 0.4399      | 2247.03467   | 85.13592     | 50.8971 |

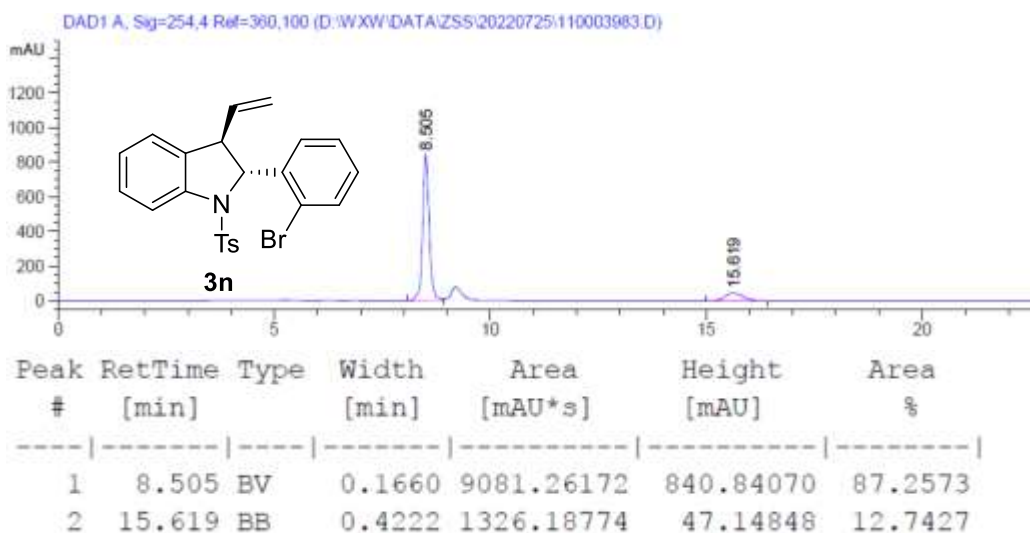

**(2*R*,3*R*)-2-([1,1'-biphenyl]-4-yl)-1-tosyl-3-vinylindoline (3o)**

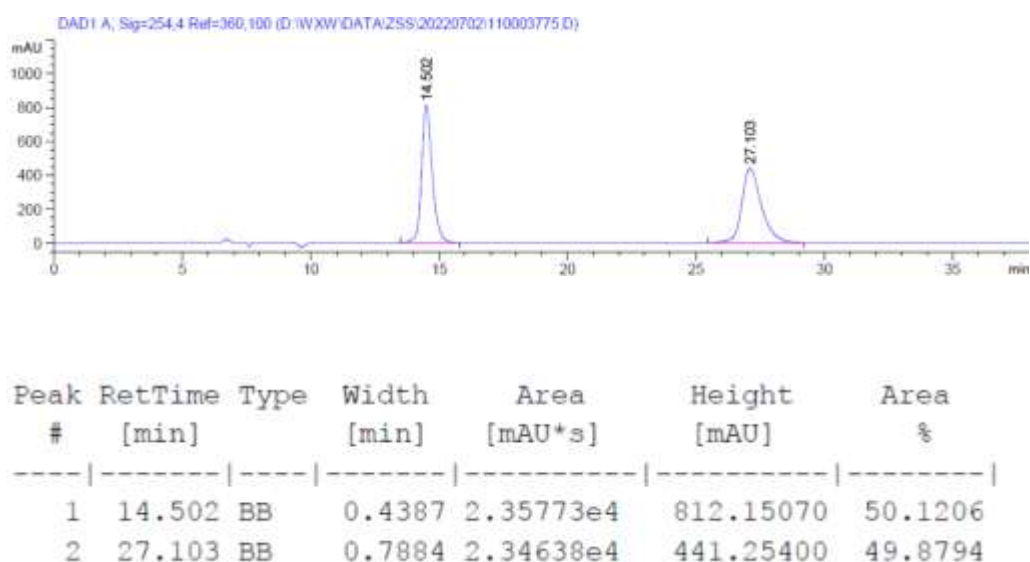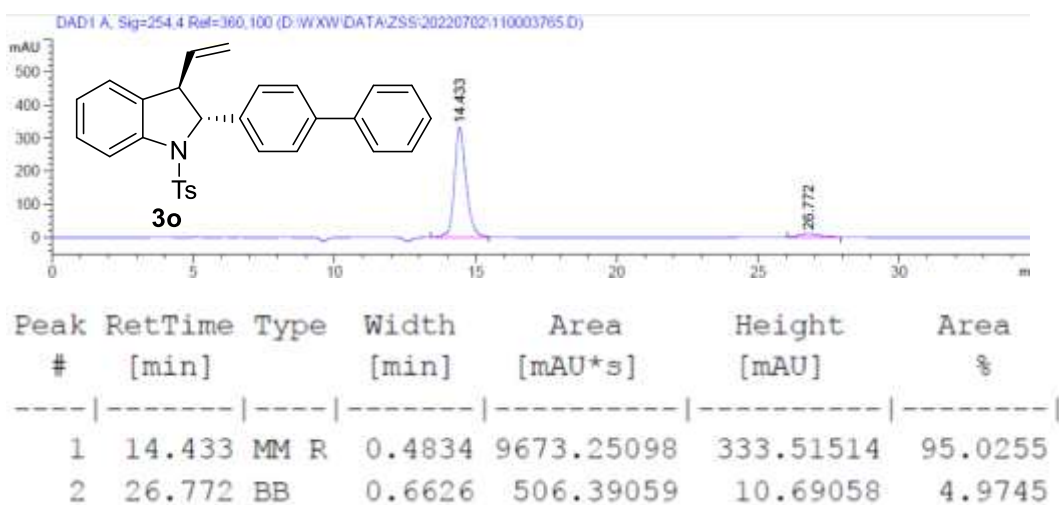

**(2*R*,3*R*)-2-(naphthalen-1-yl)-1-tosyl-3-vinylindoline (3p)**

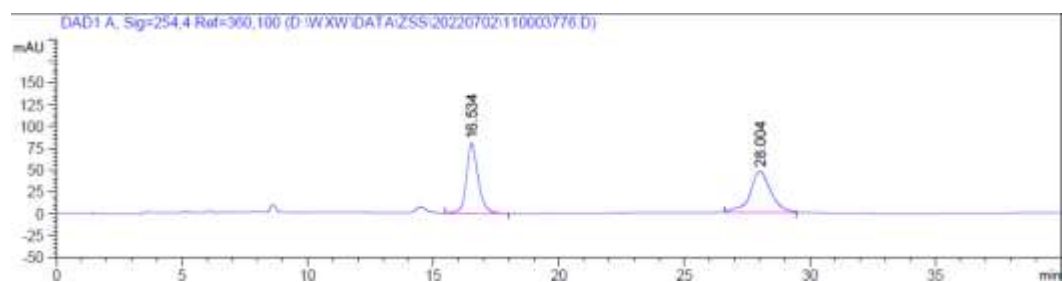

| Peak # | RetTime [min] | Type | Width [min] | Area [mAU*s] | Height [mAU] | Area %  |
|--------|---------------|------|-------------|--------------|--------------|---------|
| 1      | 16.534        | MM R | 0.5360      | 2580.15234   | 80.22732     | 49.3679 |
| 2      | 28.004        | BB   | 0.8166      | 2646.22485   | 47.02003     | 50.6321 |

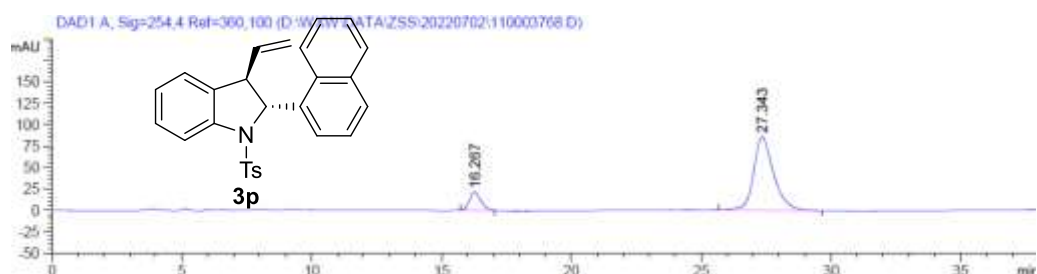

| Peak # | RetTime [min] | Type | Width [min] | Area [mAU*s] | Height [mAU] | Area %  |
|--------|---------------|------|-------------|--------------|--------------|---------|
| 1      | 16.267        | BB   | 0.4525      | 643.44244    | 21.41450     | 12.2268 |
| 2      | 27.343        | MM R | 0.9007      | 4619.13330   | 85.47237     | 87.7732 |

**(2*R*,3*R*)-2-(thiophen-2-yl)-1-tosyl-3-vinylindoline (3q)**

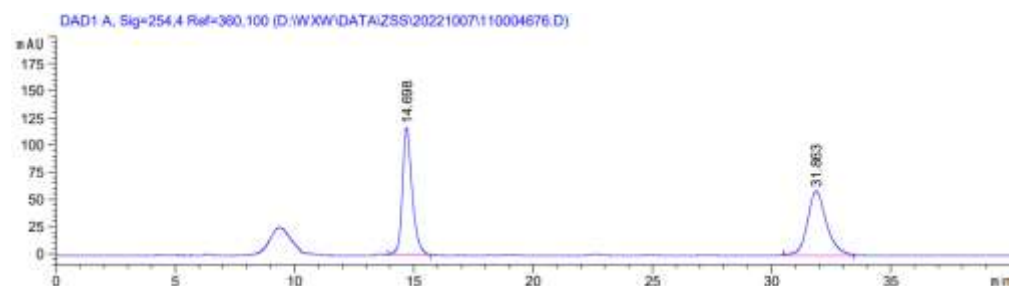

| Peak # | RetTime [min] | Type | Width [min] | Area [mAU*s] | Height [mAU] | Area %  |
|--------|---------------|------|-------------|--------------|--------------|---------|
| 1      | 14.698        | BB   | 0.4230      | 3318.68188   | 116.98586    | 49.6141 |
| 2      | 31.863        | MM R | 0.9454      | 3370.31421   | 59.41882     | 50.3859 |



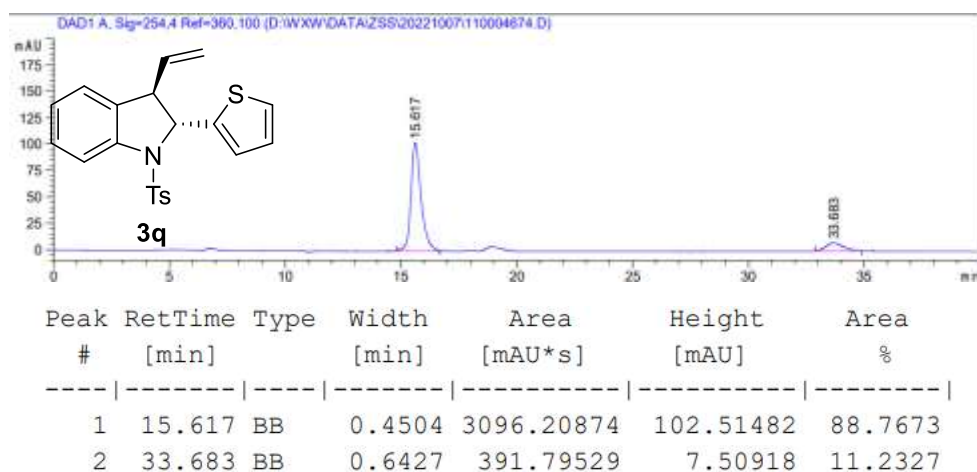

**(2R,3R)-2-(furan-2-yl)-1-tosyl-3-vinylindoline (3r)**

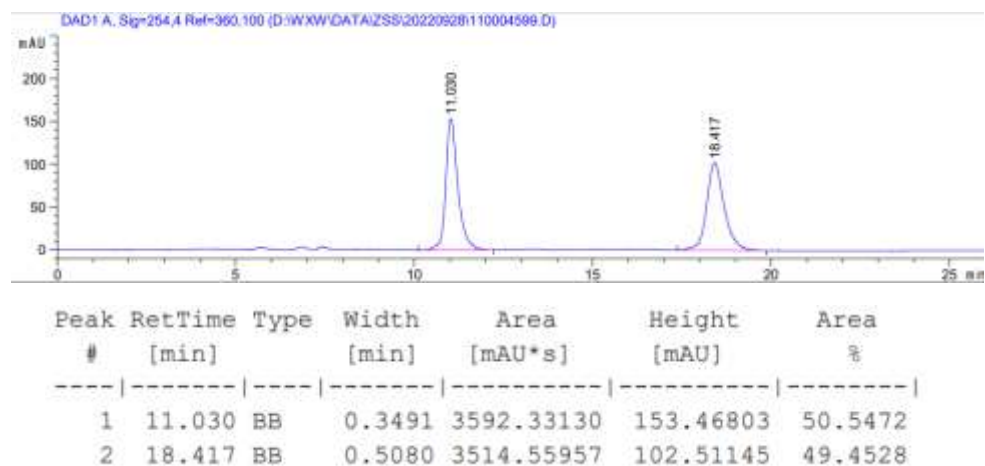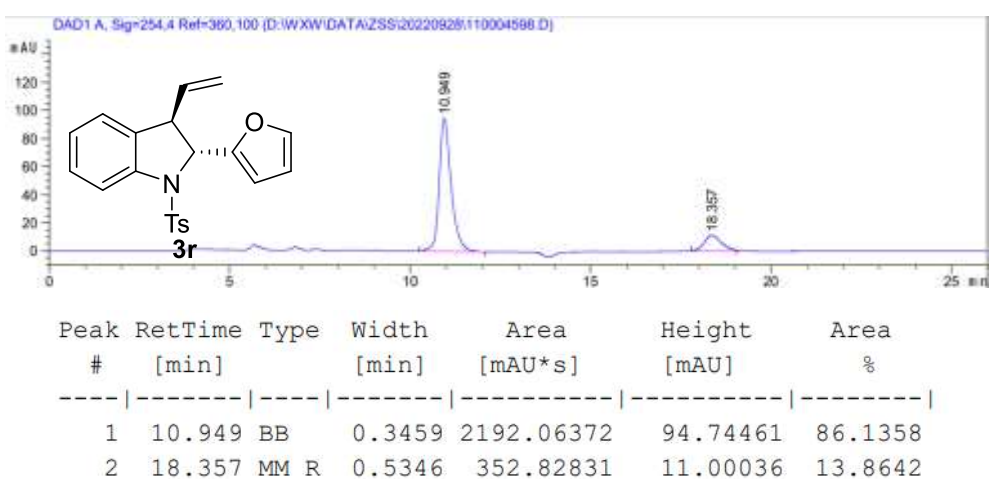

**(2*R*,3*R*)-6-fluoro-2-phenyl-1-tosyl-3-vinylindoline (3s)**

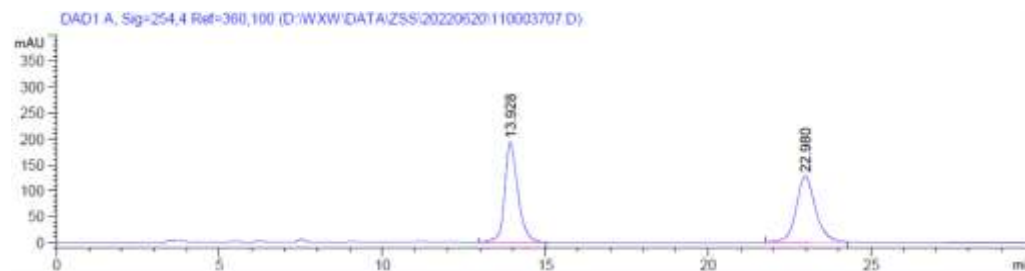

| Peak # | RetTime [min] | Type | Width [min] | Area [mAU*s] | Height [mAU] | Area %  |
|--------|---------------|------|-------------|--------------|--------------|---------|
| 1      | 13.928        | BB   | 0.4255      | 5491.58105   | 193.26498    | 50.8560 |
| 2      | 22.980        | BB   | 0.6274      | 5306.70703   | 127.53449    | 49.1440 |

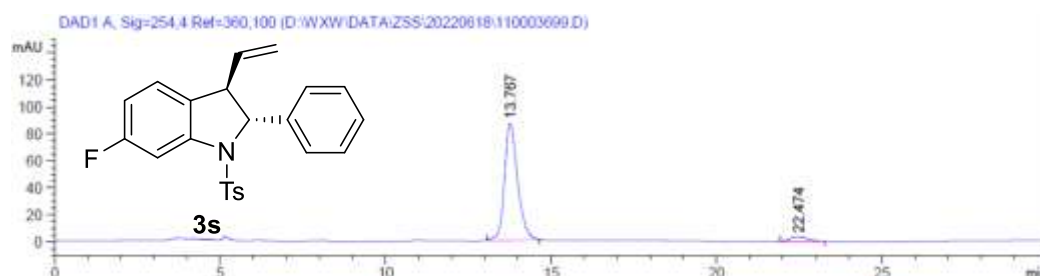

| Peak # | RetTime [min] | Type | Width [min] | Area [mAU*s] | Height [mAU] | Area %  |
|--------|---------------|------|-------------|--------------|--------------|---------|
| 1      | 13.767        | BB   | 0.4244      | 2413.32227   | 86.80238     | 95.0439 |
| 2      | 22.474        | BB   | 0.4418      | 125.84332    | 3.43154      | 4.9561  |

**(2*R*,3*R*)-6-bromo-2-phenyl-1-tosyl-3-vinylindoline (3t)**

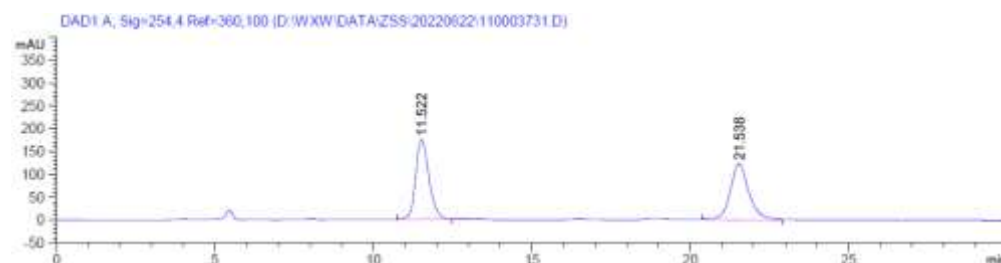

| Peak # | RetTime [min] | Type | Width [min] | Area [mAU*s] | Height [mAU] | Area %  |
|--------|---------------|------|-------------|--------------|--------------|---------|
| 1      | 11.522        | BB   | 0.4523      | 5112.61475   | 174.25105    | 50.2499 |
| 2      | 21.538        | MM R | 0.6897      | 5061.75830   | 122.31786    | 49.7501 |

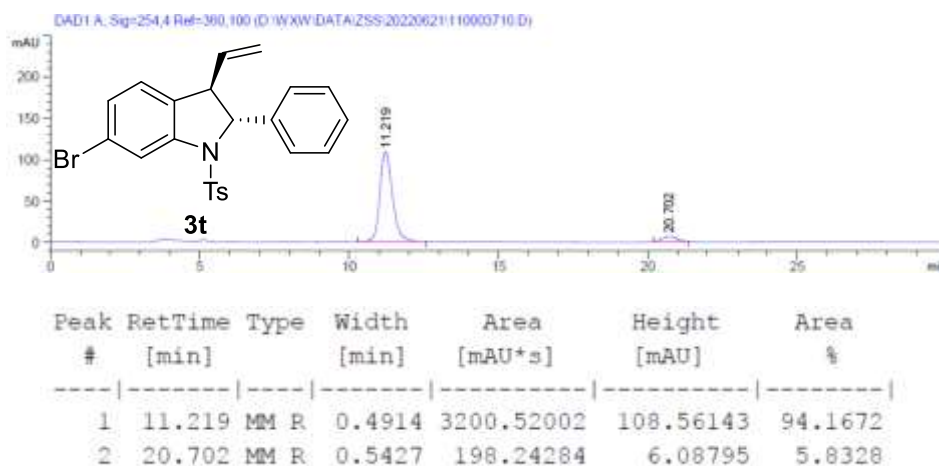

**(2R,3R)-5-methyl-2-phenyl-1-tosyl-3-vinylindoline (3u)**

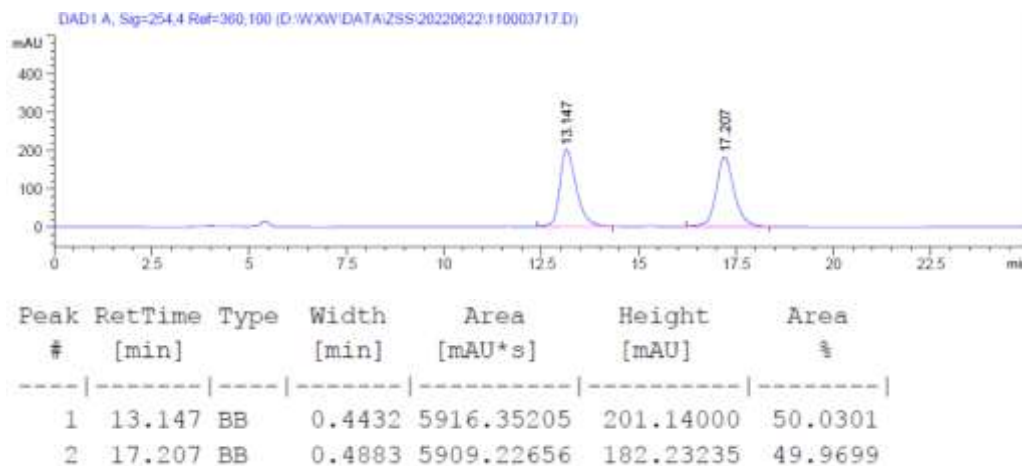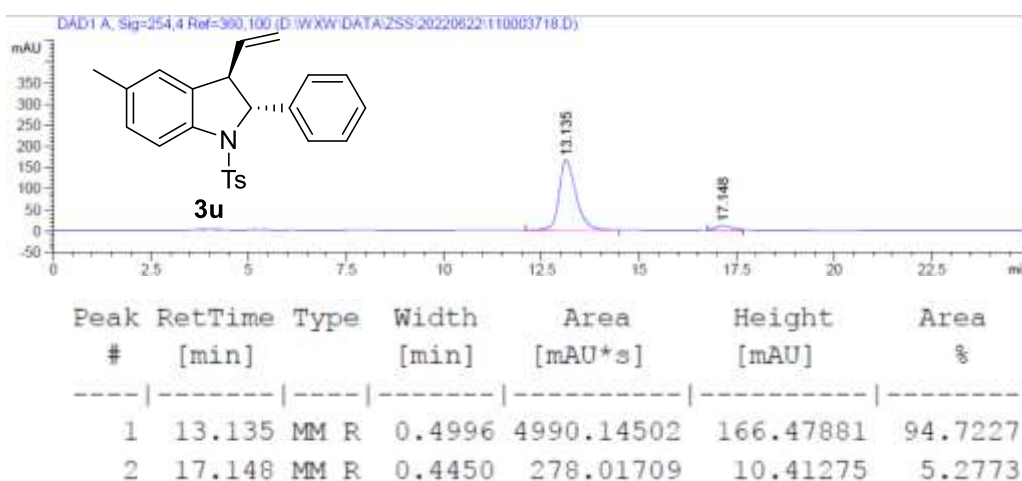

**(2R,3R)-5-chloro-2-phenyl-1-tosyl-3-vinylindoline (3v)**

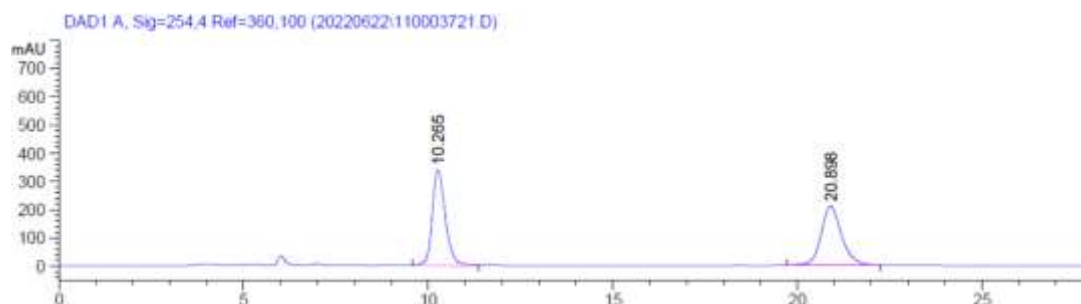

| Peak # | RetTime [min] | Type | Width [min] | Area [mAU*s] | Height [mAU] | Area %  |
|--------|---------------|------|-------------|--------------|--------------|---------|
| 1      | 10.265        | BB   | 0.3777      | 8356.94238   | 338.87027    | 50.6096 |
| 2      | 20.898        | BB   | 0.5861      | 8155.62891   | 210.44855    | 49.3904 |

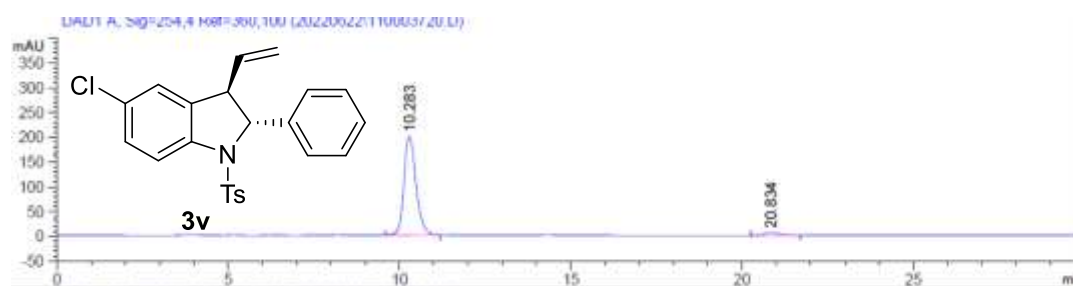

| Peak # | RetTime [min] | Type | Width [min] | Area [mAU*s] | Height [mAU] | Area %  |
|--------|---------------|------|-------------|--------------|--------------|---------|
| 1      | 10.283        | BB   | 0.3780      | 4902.43555   | 199.99683    | 95.7233 |
| 2      | 20.834        | BB   | 0.5161      | 219.03055    | 6.11145      | 4.2767  |

**(2R,3R)-4-methyl-2-phenyl-1-tosyl-3-vinylindoline (3w)**

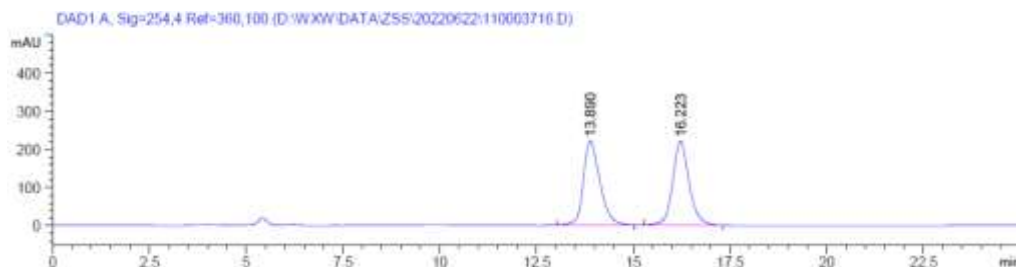

| Peak # | RetTime [min] | Type | Width [min] | Area [mAU*s] | Height [mAU] | Area %  |
|--------|---------------|------|-------------|--------------|--------------|---------|
| 1      | 13.890        | BB   | 0.4528      | 6572.88330   | 221.11736    | 50.2050 |
| 2      | 16.223        | BB   | 0.4454      | 6519.20850   | 220.17848    | 49.7950 |

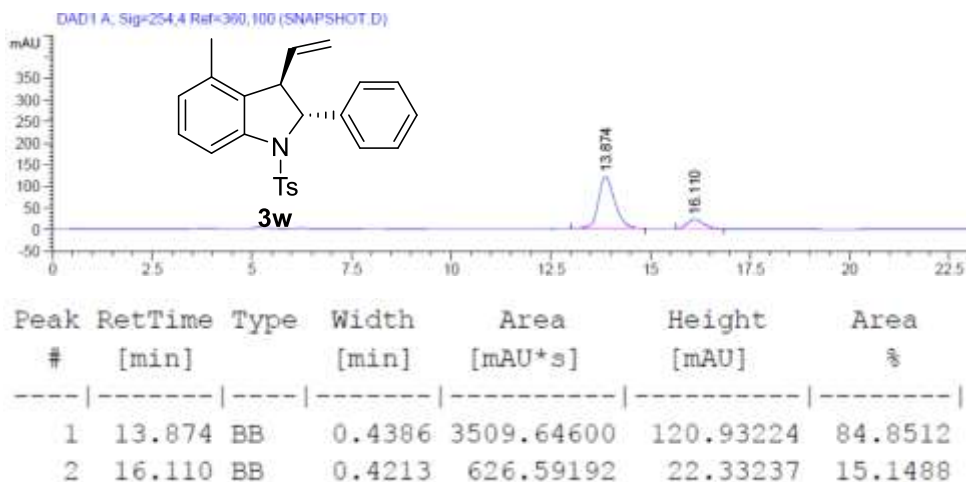

**(2R,3R)-4-chloro-2-phenyl-1-tosyl-3-vinylindoline (3x)**

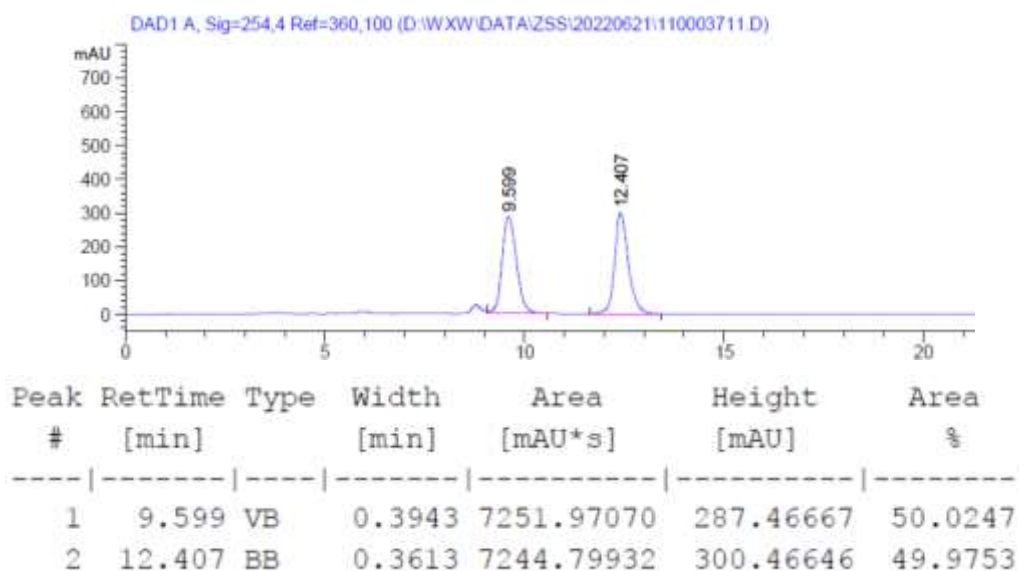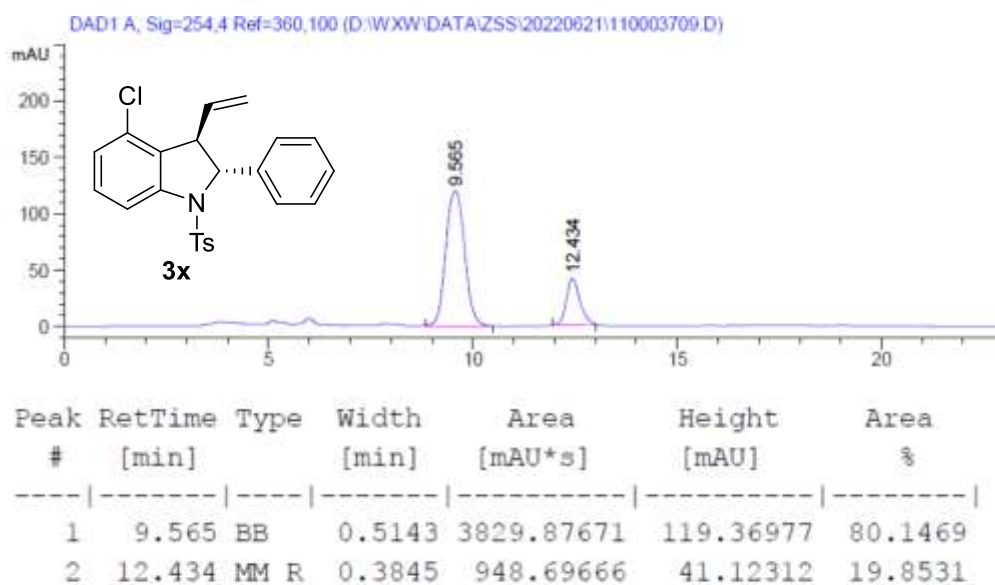

**(2R,3R)-3-ethyl-2-phenyl-1-tosylindoline (4a)**

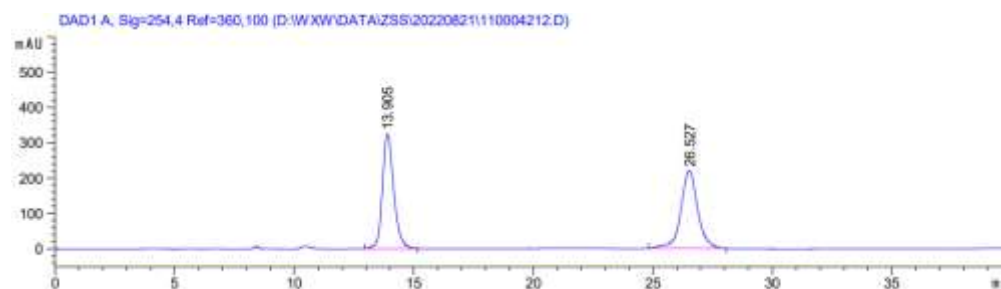

| Peak # | RetTime [min] | Type | Width [min] | Area [mAU*s] | Height [mAU] | Area %  |
|--------|---------------|------|-------------|--------------|--------------|---------|
| 1      | 13.905        | BB   | 0.4985      | 1.06665e4    | 325.34390    | 49.6478 |
| 2      | 26.527        | BB   | 0.7300      | 1.08178e4    | 220.65262    | 50.3522 |

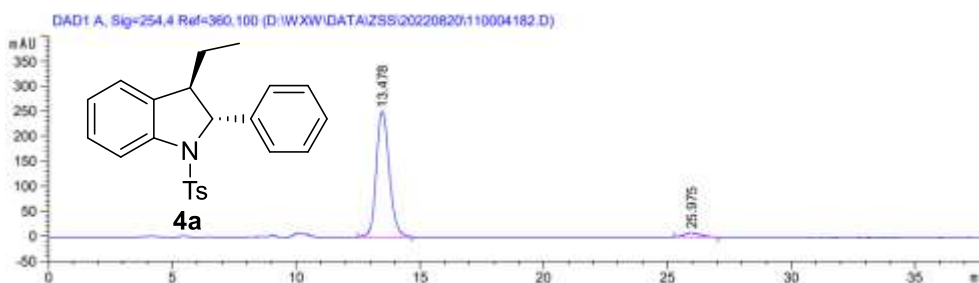

| Peak # | RetTime [min] | Type | Width [min] | Area [mAU*s] | Height [mAU] | Area %  |
|--------|---------------|------|-------------|--------------|--------------|---------|
| 1      | 13.478        | BB   | 0.5663      | 9148.49121   | 251.53532    | 96.2031 |
| 2      | 25.975        | BB   | 0.5912      | 361.06888    | 8.24104      | 3.7969  |

**(2R,3R)-2-(4'-methoxy-[1,1'-biphenyl]-4-yl)-1-tosyl-3-vinylindoline (4b)**

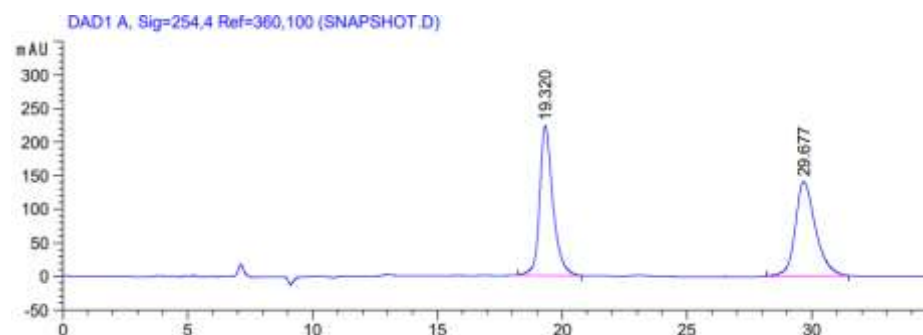

| Peak # | RetTime [min] | Type | Width [min] | Area [mAU*s] | Height [mAU] | Area %  |
|--------|---------------|------|-------------|--------------|--------------|---------|
| 1      | 19.320        | BB   | 0.5470      | 8203.08008   | 223.08563    | 50.6355 |
| 2      | 29.677        | BB   | 0.8509      | 7997.17139   | 140.75565    | 49.3645 |

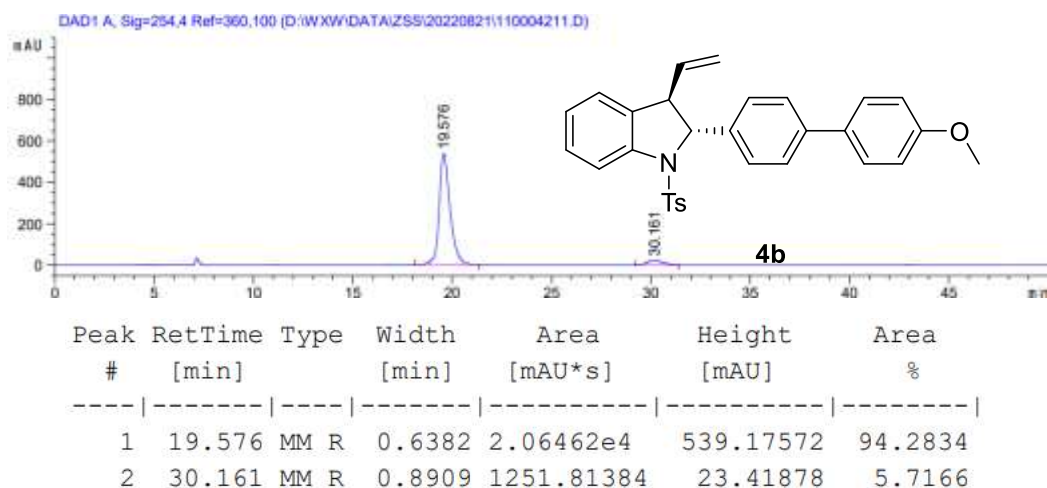

**1-((2R,3R)-2-(4-bromophenyl)-1-tosylindolin-3-yl)ethane-1,2-diol (4c)**

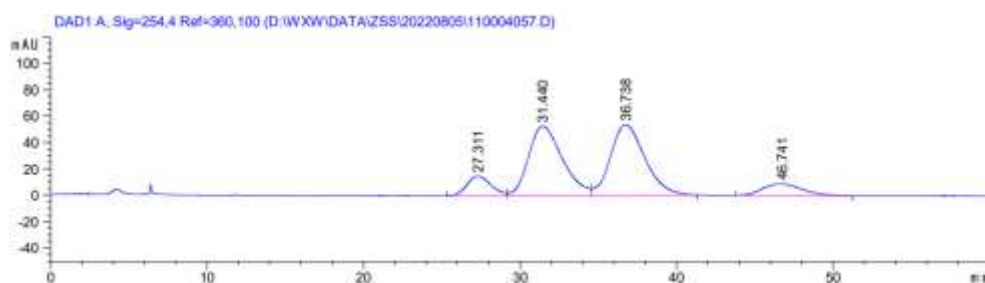

| Peak # | RetTime [min] | Type | Width [min] | Area [mAU*s] | Height [mAU] | Area %  |
|--------|---------------|------|-------------|--------------|--------------|---------|
| 1      | 27.311        | BV   | 1.3733      | 1593.60742   | 14.93011     | 8.2503  |
| 2      | 31.440        | VV   | 2.0058      | 7937.14111   | 52.79854     | 41.0914 |
| 3      | 36.738        | VB   | 2.0759      | 8196.69434   | 53.60564     | 42.4352 |
| 4      | 46.741        | BB   | 2.0907      | 1588.36292   | 8.93189      | 8.2231  |

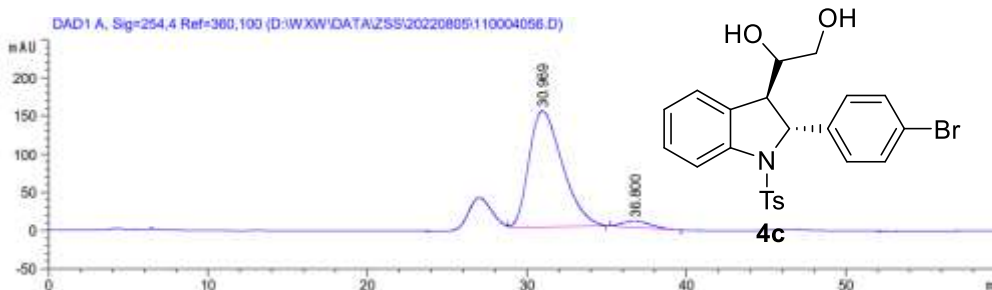

| Peak # | RetTime [min] | Type | Width [min] | Area [mAU*s] | Height [mAU] | Area %  |
|--------|---------------|------|-------------|--------------|--------------|---------|
| 1      | 30.969        | MM R | 2.4381      | 2.21437e4    | 151.37483    | 95.5183 |
| 2      | 36.800        | MM R | 2.0613      | 1038.97473   | 8.40071      | 4.4817  |

## 12. Computational details

All density functional theory (DFT) calculations were performed using Gaussian 16.<sup>12</sup> Transition-state and intermediate geometries were calculated with the B3LYP density functional<sup>13,14</sup>, and the SDD basis set with effective core potential was used for Pd and the 6-31G(d) basis set was used for other atoms. The D3 version of Grimme's dispersion with Becke-Johnson damping was added.<sup>15,16</sup> The `integral=(finegrid,acc2e=10)` keyword and options were added in the optimizations of geometries. Normal mode frequency analysis was used to confirm that the transition-state structures are saddle points (with a single imaginary frequency) and the intermediate structures are minima (without imaginary frequency) on the potential energy surfaces. All saddle points were analyzed with the intrinsic reaction coordinate calculations to verify that they connect the expected minima. Single-point energies were calculated at the MN15/SDD,6-311++G(d,p), SMD(dichloromethane) level of theory. The refined energies were corrected to Gibbs free energies at 298.15 K and 1 atm, using the gas-phase B3LYP-D3(BJ)/SDD,6-31G(d,p) harmonic frequencies. Free energies obtained from the level of MN15/SDD,6-311++G(d,p), SMD(dichloromethane) // B3LYP-D3(BJ)/SDD,6-31G(d) calculations were discussed.

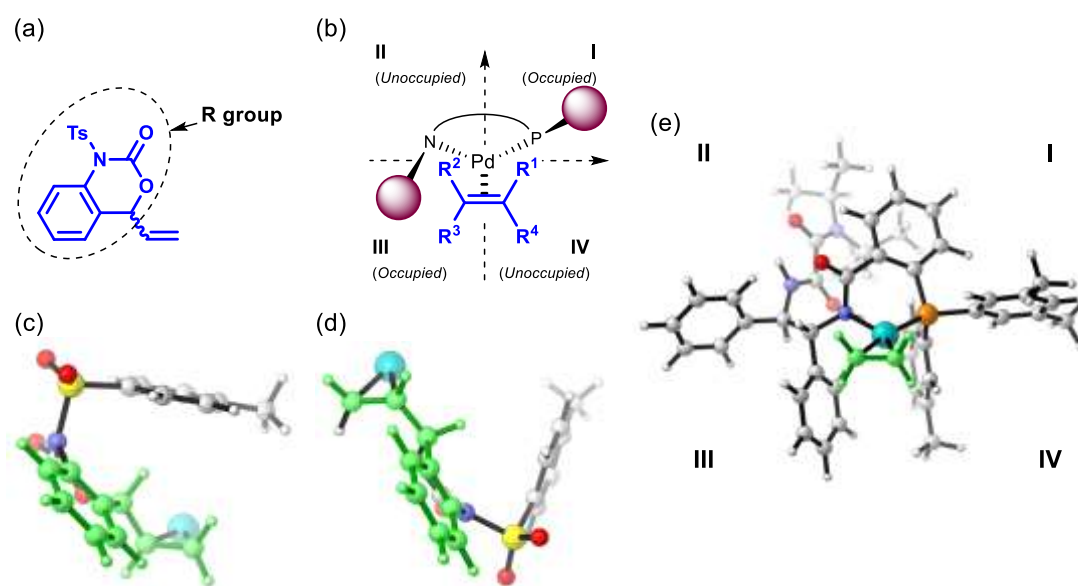

**Figure S5.** (a) Structural formula of racemic vinyl benzoxazinone (*R*)/(*S*)-**1a**. (b) Quadrant diagram of alkylene-coordinated Pd complex. (c) 3D representation of (*R*)-**1a** coordinating to a Pd



atom. (d) 3D representation of (*S*)-**1a** coordinating to a Pd atom. (e) 3D representation of an ethylene coordinating to the **L11**-coordinated Pd catalyst.

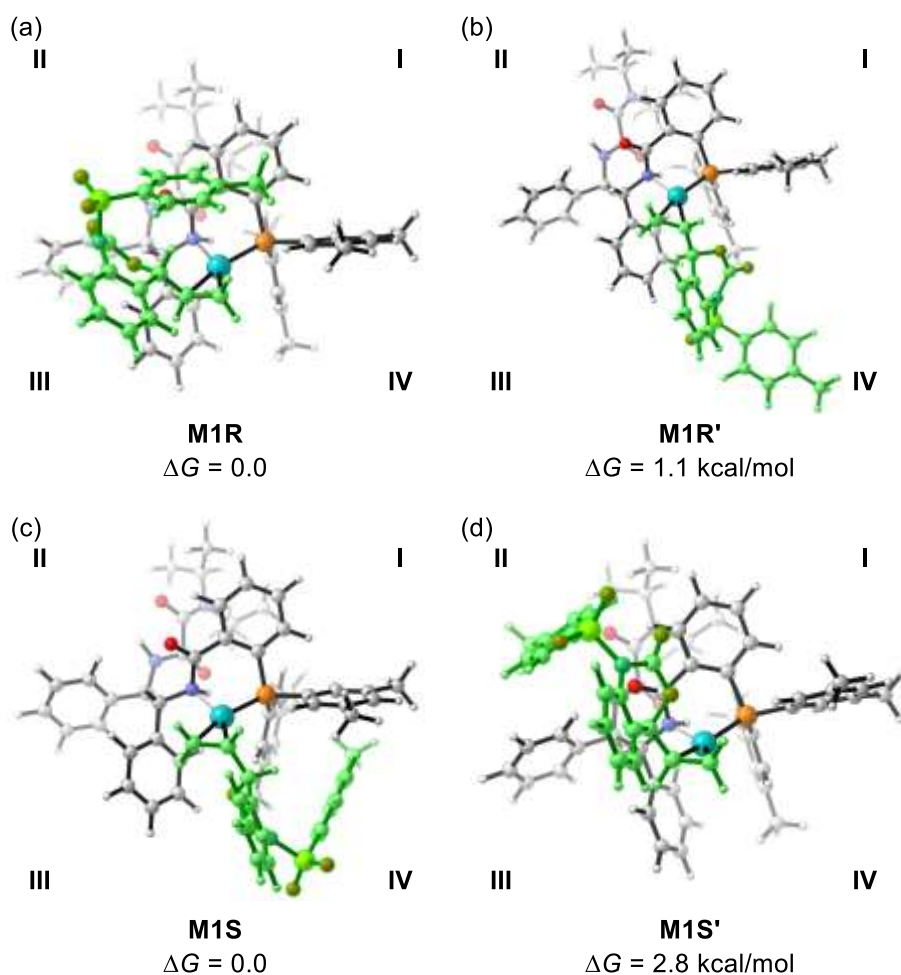

**Figure S6.** DFT-calculated geometries and relative free energies for the intermediate of R group of (*R*)-**1a** located in quadrant II (**M1R**), IV (**M1R'**) and (*S*)-**1a** located in quadrant IV (**M1S**), II (**M1S'**).

**Table S10.** DFT-calculated thermal corrections to Gibbs free energies at the level of B3LYP-D3(BJ)/SDD,6-31G(d) ( $G_{\text{corr}}$ ), and single-point energies at the level of MN15/SDD,6-311++G(d,p), SMD(dichloromethane) ( $E_{\text{sol}}$ ). All energies are given in hartree.

| Species                 | $G_{\text{corr}}$ | $E_{\text{sol}}$ | $G_{\text{corr}} + E_{\text{sol}}$ |
|-------------------------|-------------------|------------------|------------------------------------|
| ( <i>R</i> )- <b>1a</b> | 0.240308          | -1409.6440866    | -1409.4037786                      |
| CO <sub>2</sub>         | -0.009125         | -188.4518434     | -188.4609684                       |

|                          |           |               |               |
|--------------------------|-----------|---------------|---------------|
| <b>N<sub>2</sub></b>     | -0.012851 | -109.4276648  | -109.4405158  |
| <b>(2R,3R)-3a</b>        | 0.331049  | -1491.2960088 | -1490.9649598 |
| <b>M1R</b>               | 1.036819  | -4011.5452773 | -4010.5084583 |
| <b>M1R'</b>              | 1.035401  | -4011.5420284 | -4010.5066274 |
| <b>TS1R</b>              | 1.038718  | -4011.5163742 | -4010.4776562 |
| <b>M2R</b>               | 1.041523  | -4011.5474052 | -4010.5058822 |
| <b>TS2R</b>              | 1.037973  | -4011.5368027 | -4010.4988297 |
| <b>M3R</b>               | 1.026061  | -3823.0878320 | -3822.0617710 |
| <b>M1S</b>               | 1.042361  | -4011.5471041 | -4010.5047431 |
| <b>M1S'</b>              | 1.040354  | -4011.5406933 | -4010.5003393 |
| <b>TS1S</b>              | 1.037593  | -4011.5101543 | -4010.4725613 |
| <b>M2S</b>               | 1.041697  | -4011.5308611 | -4010.4891641 |
| <b>TS2S</b>              | 1.039530  | -4011.5180625 | -4010.4785325 |
| <b>M3S</b>               | 1.029603  | -3823.0837778 | -3822.0541748 |
| <b>TS3S</b>              | 1.027589  | -3823.0488874 | -3822.0212984 |
| <b>M4S</b>               | 1.028020  | -3823.0800823 | -3822.0520623 |
| <b>M5</b>                | 1.029493  | -3823.1083111 | -3822.0788181 |
| <b>M6</b>                | 1.125632  | -4093.1272420 | -4092.0016100 |
| <b>M6<sub>dia</sub></b>  | 1.124199  | -4093.1220337 | -4091.9978347 |
| <b>TS4</b>               | 1.125709  | -4093.1168410 | -4091.9911320 |
| <b>TS4<sub>dia</sub></b> | 1.126224  | -4093.1118677 | -4091.9856437 |
| <b>M7</b>                | 1.129126  | -4093.1816482 | -4092.0525222 |
| <b>M7<sub>dia</sub></b>  | 1.134194  | -4093.1892371 | -4092.0550431 |
| <b>TS5</b>               | 1.128413  | -4093.1441840 | -4092.0157710 |
| <b>M8</b>                | 1.129734  | -4093.1913442 | -4092.0616102 |

**Table S11. DFT-calculated imaginary frequencies of the transition states.**

| <b>Species</b>           | <b>Imaginary frequencies/cm<sup>-1</sup></b> | <b>Species</b> | <b>Imaginary frequencies/cm<sup>-1</sup></b> |
|--------------------------|----------------------------------------------|----------------|----------------------------------------------|
| <b>TS1R</b>              | 187.55i                                      | <b>TS2R</b>    | 204.08i                                      |
| <b>TS1S</b>              | 114.64i                                      | <b>TS2S</b>    | 252.79i                                      |
| <b>TS3S</b>              | 155.78i                                      | <b>TS4</b>     | 136.08i                                      |
| <b>TS4<sub>dia</sub></b> | 123.63i                                      | <b>TS5</b>     | 214.95i                                      |

### Cartesian coordinates of the transition-state and intermediate structures

#### (R)-1a

|   |             |             |             |
|---|-------------|-------------|-------------|
| C | -2.48032100 | -1.95236000 | -0.35832600 |
| C | -1.89571200 | -0.72319700 | -0.04849900 |
| C | -2.60453600 | 0.46875300  | -0.23967000 |
| C | -3.89063900 | 0.43334900  | -0.77124400 |
| C | -4.46877500 | -0.78774600 | -1.11903300 |
| C | -3.76238200 | -1.97152000 | -0.90744700 |
| H | -1.94559200 | -2.87629600 | -0.18705000 |
| H | -4.42978600 | 1.36411200  | -0.91633900 |
| H | -5.46819600 | -0.81439500 | -1.54207900 |
| H | -4.21292000 | -2.92680900 | -1.15905300 |
| C | -1.88569200 | 1.72624400  | 0.17850500  |
| H | -1.11888200 | 1.98820200  | -0.56392200 |
| O | -1.19040800 | 1.46301200  | 1.43730600  |
| C | -0.33926800 | 0.41576800  | 1.47950700  |
| O | 0.56977200  | 0.37012600  | 2.27191800  |
| N | -0.59707000 | -0.58764900 | 0.52941600  |
| S | 0.68257500  | -1.75207900 | 0.21849200  |
| C | 2.06851900  | -0.69019400 | -0.11709700 |
| C | 3.01601400  | -0.44913300 | 0.87615300  |
| C | 2.18823400  | -0.14291700 | -1.39533200 |
| C | 4.10388000  | 0.36385900  | 0.57327900  |
| H | 2.88413500  | -0.87853600 | 1.86090900  |
| C | 3.28041200  | 0.67258800  | -1.67328300 |
| H | 1.44515600  | -0.36486200 | -2.15339500 |
| C | 4.25253500  | 0.93560900  | -0.69763700 |
| H | 4.84725200  | 0.56462200  | 1.33978200  |
| H | 3.38541900  | 1.10666300  | -2.66386200 |
| O | 0.27833100  | -2.39167200 | -1.03263900 |
| O | 0.92588000  | -2.53756000 | 1.42109200  |
| C | 5.45052000  | 1.79358500  | -1.01747300 |
| H | 6.29859200  | 1.17429400  | -1.33732300 |
| H | 5.23483000  | 2.49697500  | -1.82758300 |
| H | 5.77655900  | 2.36565600  | -0.14309400 |
| C | -2.77679100 | 2.90103400  | 0.43429400  |
| H | -3.46124000 | 2.79004100  | 1.27290000  |
| C | -2.77311800 | 4.00250000  | -0.31269000 |
| H | -2.09103700 | 4.12168900  | -1.15146400 |
| H | -3.45187900 | 4.82688300  | -0.11568400 |

#### CO<sub>2</sub>

|   |            |            |            |
|---|------------|------------|------------|
| C | 0.00000000 | 0.00000000 | 0.00000000 |
| O | 0.00000000 | 0.00000000 | 1.16913100 |

O 0.00000000 0.00000000 -1.16913100

N<sub>2</sub>

N 0.00000000 0.00000000 0.55275000

N 0.00000000 0.00000000 -0.55275000

(2*R*,3*R*)-**3a**

C 1.72003600 1.68618500 -0.94937200

C 0.42093200 1.36262000 -0.56946400

C -0.44805000 2.33120300 -0.05390200

C -0.02034500 3.64094200 0.11495500

C 1.29389000 3.97237700 -0.23453300

C 2.15027500 3.00415900 -0.76438400

H 2.37819600 0.94154200 -1.38034200

H -0.70141900 4.39110300 0.50679400

H 1.64499400 4.99253400 -0.10853500

H 3.16156300 3.27691500 -1.05192600

C -1.80507100 1.71186800 0.21209000

H -1.86335700 1.42161300 1.26684200

N -0.23021300 0.08144200 -0.71010700

S 0.21181600 -1.07793800 0.52018800

C 1.98460800 -1.10652500 0.34332000

C 2.54273100 -1.79729000 -0.73211200

C 2.77884800 -0.42991200 1.26515500

C 3.92499700 -1.78733000 -0.89104800

H 1.89915200 -2.32546600 -1.42702900

C 4.16082900 -0.43752000 1.09448100

H 2.31131600 0.09939200 2.08743100

C 4.75267300 -1.10928800 0.01686800

H 4.37193400 -2.31652700 -1.72856000

H 4.79021600 0.09239100 1.80437600

O -0.10348200 -0.55014200 1.85955700

O -0.31141900 -2.37368400 0.08826600

C 6.25140300 -1.13131300 -0.14885700

H 6.71905300 -0.26051100 0.32076800

H 6.53719300 -1.14655200 -1.20560800

H 6.68192100 -2.02672000 0.31789800

C -2.97123500 2.58588600 -0.13510400

H -3.00427500 2.94160400 -1.16586700

C -3.93020400 2.93971400 0.71958200

H -3.92402800 2.59958900 1.75264600

H -4.75889800 3.57446700 0.41934700

C -4.08878500 -1.99536600 1.04116500

C -3.17896400 -0.95646900 0.85326000

|   |             |             |             |
|---|-------------|-------------|-------------|
| C | -2.68537400 | -0.67090400 | -0.42349300 |
| C | -3.12636500 | -1.43960000 | -1.50604100 |
| C | -4.03222700 | -2.48049100 | -1.32107900 |
| C | -4.51707600 | -2.76082000 | -0.04295500 |
| H | -4.45956300 | -2.20896400 | 2.03959300  |
| H | -2.83459900 | -0.38941600 | 1.70977200  |
| H | -2.74481000 | -1.22204900 | -2.50050300 |
| H | -4.36063800 | -3.07037800 | -2.17220500 |
| H | -5.22564000 | -3.57074800 | 0.10659600  |
| C | -1.71141800 | 0.44890100  | -0.68958700 |
| H | -1.87330400 | 0.78755100  | -1.71999800 |

**M1R**

|    |             |             |             |
|----|-------------|-------------|-------------|
| C  | 0.80257800  | 3.04885300  | -1.35947700 |
| C  | -0.03141500 | 1.72136500  | -1.37102200 |
| H  | 1.61809600  | 2.92874400  | -2.07661100 |
| N  | 1.44383900  | 3.29364400  | -0.07730400 |
| N  | 0.61114300  | 0.67172200  | -0.56767800 |
| H  | 1.56083000  | 0.45442500  | -0.86015300 |
| C  | 1.38056100  | -0.12211700 | 1.64688700  |
| C  | 1.89700600  | -1.39813500 | 1.30872900  |
| C  | 2.70482700  | -2.05745300 | 2.24764500  |
| C  | 2.99994400  | -1.48539800 | 3.48453600  |
| C  | 2.48817200  | -0.22935200 | 3.80999500  |
| C  | 1.68585000  | 0.44408900  | 2.89351800  |
| P  | 1.38756700  | -2.25270000 | -0.25336200 |
| H  | 3.08642600  | -3.04542700 | 2.01587400  |
| H  | 3.62200500  | -2.02541900 | 4.19286600  |
| H  | 2.70299700  | 0.22159800  | 4.77336200  |
| H  | 1.27294500  | 1.41919500  | 3.12616200  |
| Pd | -0.64007200 | -1.41799800 | -0.94972100 |
| C  | 2.71489000  | -1.82170700 | -1.44497700 |
| C  | 3.79193200  | -0.98635900 | -1.14099900 |
| C  | 4.69718100  | -0.59488100 | -2.14106300 |
| C  | 4.51321000  | -1.08134100 | -3.43607400 |
| C  | 3.44924900  | -1.93656300 | -3.76286200 |
| C  | 2.54656700  | -2.28513000 | -2.76061800 |
| H  | 3.92580400  | -0.61818100 | -0.12899100 |
| H  | 5.20971000  | -0.78186400 | -4.21655700 |
| H  | 1.68469200  | -2.90207400 | -3.00180300 |
| C  | 1.68830300  | -4.02650300 | 0.08372800  |
| C  | 0.58031600  | -4.80842200 | 0.41783400  |
| C  | 0.72620300  | -6.16935500 | 0.71720600  |
| C  | 2.00288300  | -6.73136100 | 0.64750500  |

|   |             |             |             |
|---|-------------|-------------|-------------|
| C | 3.12832300  | -5.97529200 | 0.28575700  |
| C | 2.95821900  | -4.61801900 | 0.00663000  |
| H | -0.40296200 | -4.34643700 | 0.42929000  |
| H | 2.12743400  | -7.79006600 | 0.86733600  |
| H | 3.81555800  | -4.01646800 | -0.28345600 |
| C | 2.66782700  | 2.81658400  | 0.20005100  |
| O | 3.32505500  | 2.13720200  | -0.60047500 |
| H | 0.96518300  | 3.77906500  | 0.67440900  |
| H | -0.99743200 | 1.89250500  | -0.90200700 |
| C | 0.43627100  | 0.70684700  | 0.81318200  |
| O | -0.42634000 | 1.39310600  | 1.34637900  |
| C | -0.22932600 | 1.26592500  | -2.79815700 |
| C | -1.45986600 | 1.46853900  | -3.42919900 |
| C | 0.82047200  | 0.67960700  | -3.51665100 |
| C | -1.64918900 | 1.06558900  | -4.75124800 |
| H | -2.27034900 | 1.92405100  | -2.87083000 |
| C | 0.62906600  | 0.26801700  | -4.83460500 |
| H | 1.79233400  | 0.53401300  | -3.05374000 |
| C | -0.60779100 | 0.45693100  | -5.45479100 |
| H | -2.61123500 | 1.22545900  | -5.23029200 |
| H | 1.44886900  | -0.19493300 | -5.37532900 |
| H | -0.75646700 | 0.13967300  | -6.48336800 |
| C | -0.07209400 | 4.21451400  | -1.76200000 |
| C | 0.22509600  | 4.96171600  | -2.90449000 |
| C | -1.20593900 | 4.53401000  | -1.00456200 |
| C | -0.59788600 | 6.02123400  | -3.28810500 |
| H | 1.09859700  | 4.70648500  | -3.49889400 |
| C | -2.02736900 | 5.59343100  | -1.38767900 |
| H | -1.47810500 | 3.94101800  | -0.13699800 |
| C | -1.72498600 | 6.33985800  | -2.52863900 |
| H | -0.36054800 | 6.59401600  | -4.18036400 |
| H | -2.90995600 | 5.82072600  | -0.79730000 |
| H | -2.36883000 | 7.16194800  | -2.82902800 |
| C | 3.10103300  | 3.25795700  | 1.63170000  |
| O | 2.25147300  | 3.87378000  | 2.28813200  |
| N | 4.35268600  | 3.01837700  | 2.08906200  |
| C | 5.35070300  | 2.15572600  | 1.41287500  |
| C | 4.77474800  | 3.67282500  | 3.35688800  |
| H | 5.83038400  | 3.41132400  | 3.45979600  |
| C | 4.03921500  | 3.11207000  | 4.57852200  |
| C | 3.28715600  | -2.46577000 | -5.16731500 |
| H | 3.62852400  | -1.73788300 | -5.91139900 |
| H | 3.87493700  | -3.38110000 | -5.31537300 |
| H | 2.24132400  | -2.70854700 | -5.38065700 |

|   |             |             |             |
|---|-------------|-------------|-------------|
| C | 5.81999500  | 0.35965500  | -1.82217400 |
| H | 6.56486200  | 0.38445800  | -2.62355900 |
| H | 5.42410200  | 1.37122100  | -1.68308400 |
| H | 6.32955800  | 0.07790000  | -0.89320900 |
| C | 4.48770700  | -6.62552000 | 0.18949600  |
| H | 4.74117000  | -7.16057200 | 1.11237800  |
| H | 4.51983700  | -7.35790600 | -0.62677000 |
| H | 5.27087100  | -5.88453500 | 0.00231600  |
| C | -0.47383500 | -6.99546600 | 1.11282800  |
| H | -0.25423700 | -8.06690900 | 1.07532800  |
| H | -0.79561900 | -6.75871700 | 2.13535500  |
| H | -1.32603500 | -6.79927000 | 0.45239200  |
| H | 4.82781200  | 1.70227200  | 0.57922100  |
| H | 4.17055200  | 2.02807900  | 4.64136000  |
| H | 4.44854500  | 3.56018100  | 5.49098300  |
| H | 2.97326700  | 3.33809400  | 4.52383300  |
| C | 4.69747600  | 5.20129600  | 3.26598600  |
| H | 3.66349200  | 5.53915800  | 3.18778800  |
| H | 5.14418100  | 5.64105400  | 4.16464900  |
| H | 5.25436100  | 5.56301600  | 2.39505200  |
| C | 5.83194600  | 1.02689100  | 2.33130200  |
| H | 4.98489000  | 0.44284000  | 2.70160400  |
| H | 6.48541000  | 0.35767000  | 1.76035300  |
| H | 6.40750500  | 1.38994800  | 3.18994500  |
| C | 6.50105800  | 2.99181600  | 0.84405600  |
| H | 6.11608200  | 3.73334400  | 0.13696300  |
| H | 7.05943400  | 3.51739400  | 1.62717200  |
| H | 7.20554800  | 2.34402300  | 0.31132300  |
| C | -7.19382800 | 0.25578300  | -0.15478700 |
| C | -5.80115300 | 0.26060300  | -0.07719900 |
| C | -5.03522400 | -0.66801000 | -0.78950300 |
| C | -5.67114800 | -1.61796400 | -1.58393600 |
| C | -7.06597200 | -1.64674100 | -1.65057400 |
| C | -7.82178700 | -0.71494300 | -0.93584000 |
| H | -7.76404500 | 0.99056100  | 0.39890700  |
| H | -5.07150500 | -2.33405300 | -2.13608900 |
| H | -7.56192500 | -2.39201300 | -2.26565000 |
| H | -8.90598100 | -0.73321300 | -0.99421900 |
| C | -3.54286700 | -0.54847000 | -0.60080500 |
| H | -3.28270500 | -0.89333700 | 0.40401700  |
| O | -3.21821300 | 0.88691800  | -0.65092000 |
| C | -3.84270800 | 1.70828300  | 0.21583100  |
| O | -3.37121500 | 2.77295100  | 0.52739800  |
| N | -5.10459600 | 1.24485300  | 0.69654800  |

|   |             |             |             |
|---|-------------|-------------|-------------|
| S | -5.28098600 | 1.16396800  | 2.44350500  |
| C | -4.13883500 | -0.15413300 | 2.80131700  |
| C | -2.78228100 | 0.15105100  | 2.93321300  |
| C | -4.59401600 | -1.47383000 | 2.76336300  |
| C | -1.87134800 | -0.89582800 | 3.03270600  |
| H | -2.43945000 | 1.17837200  | 2.91670800  |
| C | -3.66146400 | -2.50490600 | 2.86230100  |
| H | -5.65225500 | -1.67821300 | 2.64758100  |
| C | -2.29209500 | -2.23209600 | 2.99562300  |
| H | -0.81561900 | -0.66882500 | 3.12114400  |
| H | -4.00159400 | -3.53681500 | 2.83186700  |
| O | -6.64457000 | 0.69165600  | 2.66795100  |
| O | -4.79062100 | 2.41274800  | 3.00266500  |
| C | -1.28228900 | -3.34429000 | 3.11957800  |
| H | -1.05231800 | -3.54686500 | 4.17396800  |
| H | -1.65292500 | -4.27531200 | 2.67938000  |
| H | -0.34318400 | -3.08117800 | 2.62455800  |
| C | -2.67953200 | -1.25607900 | -1.59803000 |
| H | -2.73099700 | -0.87036500 | -2.61475700 |
| C | -2.32189100 | -2.60625800 | -1.38373200 |
| H | -2.65706000 | -3.12119800 | -0.48296800 |
| H | -2.12234600 | -3.25849000 | -2.23174800 |

#### **M1R'**

|    |             |             |             |
|----|-------------|-------------|-------------|
| C  | -3.08170500 | 2.84352800  | 0.48673900  |
| C  | -1.95945600 | 2.24468400  | -0.43651000 |
| H  | -2.78144400 | 2.67384400  | 1.52353300  |
| N  | -4.35451700 | 2.16369100  | 0.31976000  |
| N  | -2.12013100 | 0.80283900  | -0.62063400 |
| H  | -2.11002100 | 0.26759500  | 0.24392300  |
| C  | -3.35799500 | -1.12882400 | -1.50394700 |
| C  | -2.48076100 | -2.17556600 | -1.11856700 |
| C  | -2.97627600 | -3.48780100 | -1.12336500 |
| C  | -4.28640400 | -3.77250500 | -1.50486500 |
| C  | -5.13694700 | -2.73870400 | -1.89710900 |
| C  | -4.67197500 | -1.42722300 | -1.89178100 |
| P  | -0.67715000 | -1.87879600 | -0.77174300 |
| H  | -2.31452600 | -4.30263800 | -0.85096500 |
| H  | -4.63590100 | -4.80127100 | -1.50523000 |
| H  | -6.15383300 | -2.95120700 | -2.21162500 |
| H  | -5.31416500 | -0.60567600 | -2.18866300 |
| Pd | -0.13535900 | 0.10074500  | -1.83909700 |
| C  | -0.59252000 | -1.81881200 | 1.05941300  |
| C  | -1.72594800 | -1.78842100 | 1.87610400  |



|   |             |             |             |
|---|-------------|-------------|-------------|
| C | -1.60221700 | -1.59969700 | 3.26311500  |
| C | -0.32529500 | -1.46478700 | 3.80534900  |
| C | 0.83134100  | -1.51265500 | 3.00988600  |
| C | 0.68516200  | -1.67699900 | 1.63244800  |
| H | -2.71434900 | -1.90340800 | 1.44321300  |
| H | -0.21972800 | -1.31853600 | 4.87866000  |
| H | 1.56891700  | -1.69187600 | 1.00147900  |
| C | 0.11532800  | -3.47580900 | -1.18392100 |
| C | 0.62563400  | -3.61995600 | -2.47727300 |
| C | 1.24262300  | -4.81164600 | -2.87439800 |
| C | 1.34590500  | -5.85015500 | -1.94407200 |
| C | 0.85918600  | -5.72408000 | -0.63622600 |
| C | 0.23860600  | -4.52787600 | -0.26696300 |
| H | 0.54786600  | -2.78496300 | -3.17032100 |
| H | 1.82654600  | -6.78039900 | -2.24144000 |
| H | -0.14300800 | -4.40918100 | 0.74304800  |
| C | -4.66549100 | 1.06124900  | 1.02353800  |
| O | -3.90820400 | 0.56563500  | 1.86598800  |
| H | -5.01711000 | 2.43072200  | -0.40064400 |
| H | -2.07310000 | 2.67097200  | -1.43225300 |
| C | -3.01339000 | 0.33566400  | -1.58130700 |
| O | -3.51577900 | 1.07456500  | -2.42143400 |
| C | -0.58548400 | 2.58314000  | 0.10630700  |
| C | 0.07038000  | 3.73470700  | -0.34216400 |
| C | 0.05062600  | 1.76525100  | 1.05025100  |
| C | 1.35265100  | 4.04507300  | 0.11417900  |
| H | -0.42126600 | 4.37919300  | -1.06561400 |
| C | 1.33746600  | 2.06734300  | 1.49876400  |
| H | -0.43549100 | 0.87337700  | 1.42942500  |
| C | 1.99568500  | 3.20629000  | 1.02761600  |
| H | 1.85464300  | 4.93504500  | -0.25486000 |
| H | 1.83546500  | 1.40674400  | 2.20014700  |
| H | 3.00248300  | 3.43249700  | 1.36449100  |
| C | -3.22228400 | 4.32392700  | 0.21540300  |
| C | -2.85376000 | 5.26563800  | 1.17830700  |
| C | -3.68396300 | 4.76420200  | -1.03272700 |
| C | -2.94905000 | 6.63096200  | 0.90436500  |
| H | -2.48190000 | 4.92729200  | 2.14144900  |
| C | -3.78715700 | 6.12742000  | -1.30443200 |
| H | -3.94926800 | 4.03714100  | -1.79753800 |
| C | -3.41846700 | 7.06435300  | -0.33591700 |
| H | -2.65568200 | 7.35422200  | 1.65988100  |
| H | -4.14888500 | 6.45796100  | -2.27387100 |
| H | -3.49343800 | 8.12675500  | -0.54964400 |

|   |              |             |             |
|---|--------------|-------------|-------------|
| C | -6.08398700  | 0.55584200  | 0.61400000  |
| O | -6.63034500  | 1.17550700  | -0.30855900 |
| N | -6.68064700  | -0.46626900 | 1.26950600  |
| C | -6.02208200  | -1.32393200 | 2.28409200  |
| C | -8.10468200  | -0.76576400 | 0.95795400  |
| H | -8.37256200  | -1.56491200 | 1.65267000  |
| C | -8.29265300  | -1.30970300 | -0.46191900 |
| C | 2.19784300   | -1.39946300 | 3.64080500  |
| H | 2.20332000   | -0.65222900 | 4.44221300  |
| H | 2.49702100   | -2.35699700 | 4.08856200  |
| H | 2.95617100   | -1.12098800 | 2.90787300  |
| C | -2.82774500  | -1.52833900 | 4.13970700  |
| H | -2.56238000  | -1.58251400 | 5.20019700  |
| H | -3.36918400  | -0.59300000 | 3.96422300  |
| H | -3.51940700  | -2.35101200 | 3.92203500  |
| C | 1.02532800   | -6.84702900 | 0.35945700  |
| H | 0.90894300   | -7.82667300 | -0.11703700 |
| H | 2.02316900   | -6.82340200 | 0.81658100  |
| H | 0.29330300   | -6.77227200 | 1.16996600  |
| C | 1.81337700   | -4.95063300 | -4.26524500 |
| H | 2.01739700   | -5.99743100 | -4.51201700 |
| H | 1.12779300   | -4.54975400 | -5.02004800 |
| H | 2.75694800   | -4.39759500 | -4.35853800 |
| H | -4.99109900  | -0.99411300 | 2.32233300  |
| H | -7.65947300  | -2.18633600 | -0.62250200 |
| H | -9.33739500  | -1.60887100 | -0.60383700 |
| H | -8.03979300  | -0.55044700 | -1.20329700 |
| C | -9.02010800  | 0.42488600  | 1.26538700  |
| H | -8.82692600  | 1.25478100  | 0.58446900  |
| H | -10.06597500 | 0.11672800  | 1.15629500  |
| H | -8.87099900  | 0.76962000  | 2.29412700  |
| C | -6.02578700  | -2.79634100 | 1.85882400  |
| H | -5.55890000  | -2.91688400 | 0.87753400  |
| H | -5.44922100  | -3.37980700 | 2.58530000  |
| H | -7.03308500  | -3.22619500 | 1.82018100  |
| C | -6.63273200  | -1.10298600 | 3.67137100  |
| H | -6.56142000  | -0.04816200 | 3.95513400  |
| H | -7.68563300  | -1.40357700 | 3.71811600  |
| H | -6.08573000  | -1.69392200 | 4.41372100  |
| C | 6.31391000   | 1.88886900  | -1.60556500 |
| C | 5.05108300   | 1.37849300  | -1.31124800 |
| C | 4.02293800   | 1.40524600  | -2.25865500 |
| C | 4.25490800   | 1.96868100  | -3.50972600 |
| C | 5.50739300   | 2.50944100  | -3.80764100 |

|   |             |             |             |
|---|-------------|-------------|-------------|
| C | 6.52848500  | 2.46821200  | -2.85696200 |
| H | 7.11417500  | 1.84104400  | -0.87836500 |
| H | 3.44838900  | 1.99406200  | -4.23505600 |
| H | 5.68654500  | 2.95788900  | -4.78015800 |
| H | 7.50625000  | 2.87947800  | -3.08968100 |
| C | 2.71877100  | 0.81826600  | -1.78608500 |
| H | 2.30253900  | 1.46995600  | -1.01130500 |
| O | 3.04109500  | -0.45634800 | -1.11679200 |
| C | 3.89630400  | -0.41433000 | -0.09513600 |
| O | 3.96346900  | -1.30725700 | 0.72325600  |
| N | 4.72953100  | 0.73107600  | -0.07400200 |
| S | 5.31953800  | 1.32777000  | 1.44035400  |
| C | 6.83912300  | 0.43948700  | 1.71241300  |
| C | 8.03645900  | 1.15303800  | 1.70029800  |
| C | 6.80671000  | -0.93611000 | 1.95802800  |
| C | 9.22873400  | 0.46754400  | 1.92982800  |
| H | 8.02568900  | 2.22218800  | 1.52063400  |
| C | 8.00928000  | -1.59741100 | 2.17982300  |
| H | 5.86112200  | -1.46537500 | 1.94660300  |
| C | 9.23427300  | -0.91103500 | 2.17137400  |
| H | 10.16787400 | 1.01382000  | 1.92328600  |
| H | 7.99945200  | -2.66861500 | 2.36341900  |
| O | 4.33874400  | 0.94728800  | 2.45020500  |
| O | 5.64097700  | 2.73242100  | 1.19756000  |
| C | 10.52326900 | -1.64985900 | 2.43054200  |
| H | 10.57600700 | -1.99292200 | 3.47134200  |
| H | 10.60603700 | -2.53792400 | 1.79372800  |
| H | 11.39411200 | -1.01481600 | 2.24370400  |
| C | 0.74700500  | 1.57753500  | -3.11722000 |
| H | 0.81531600  | 2.53316100  | -2.60265800 |
| C | 1.67256900  | 0.55147500  | -2.82750000 |
| H | 1.94151700  | -0.18671300 | -3.58188800 |
| H | 0.24696100  | 1.60007400  | -4.08317500 |

#### TS1R

|   |             |             |             |
|---|-------------|-------------|-------------|
| C | 0.76249900  | -3.19947300 | 1.12835200  |
| C | -0.04576700 | -1.85322900 | 1.19700300  |
| H | 1.43820300  | -3.22746000 | 1.98597200  |
| N | 1.61895900  | -3.29160000 | -0.04535200 |
| N | 0.60364000  | -0.75480500 | 0.45906800  |
| H | 1.50942200  | -0.50399600 | 0.85041600  |
| C | 1.55461200  | 0.14556000  | -1.63721000 |
| C | 1.95304900  | 1.42708900  | -1.18936900 |
| C | 2.84162500  | 2.17175200  | -1.97999300 |

|    |             |             |             |
|----|-------------|-------------|-------------|
| C  | 3.31822900  | 1.67670000  | -3.19266900 |
| C  | 2.90926200  | 0.41883200  | -3.63739500 |
| C  | 2.03900100  | -0.34005300 | -2.85997100 |
| P  | 1.19431000  | 2.20192200  | 0.30249000  |
| H  | 3.13507500  | 3.16448700  | -1.65564500 |
| H  | 3.99668300  | 2.27751600  | -3.79146700 |
| H  | 3.26235500  | 0.02933300  | -4.58651800 |
| H  | 1.71872800  | -1.32462700 | -3.18147200 |
| Pd | -0.76465900 | 1.20695400  | 0.84386300  |
| C  | 2.38273900  | 1.89458800  | 1.65852200  |
| C  | 3.53333100  | 1.11521700  | 1.50485800  |
| C  | 4.31951300  | 0.78245800  | 2.61764900  |
| C  | 3.94430100  | 1.27079100  | 3.87211300  |
| C  | 2.80295100  | 2.06438800  | 4.04850000  |
| C  | 2.02082200  | 2.35820500  | 2.93202600  |
| H  | 3.81495600  | 0.74584200  | 0.52408000  |
| H  | 4.55053600  | 1.01795000  | 4.73925900  |
| H  | 1.10451800  | 2.93070500  | 3.05305700  |
| C  | 1.28666200  | 3.99337600  | -0.02734400 |
| C  | 0.21377700  | 4.57287100  | -0.71314200 |
| C  | 0.22227000  | 5.93354400  | -1.03586600 |
| C  | 1.31801700  | 6.70500200  | -0.63465600 |
| C  | 2.39591900  | 6.15275800  | 0.07015400  |
| C  | 2.37205900  | 4.78640100  | 0.36637300  |
| H  | -0.63352500 | 3.95470800  | -0.99321500 |
| H  | 1.33010400  | 7.76781600  | -0.86895500 |
| H  | 3.19758400  | 4.33888200  | 0.91243300  |
| C  | 2.84040500  | -2.74011400 | -0.07698800 |
| O  | 3.31730100  | -2.09739600 | 0.87101200  |
| H  | 1.29830700  | -3.74000600 | -0.89739000 |
| H  | -1.01475700 | -1.98140100 | 0.72350700  |
| C  | 0.58436600  | -0.77571000 | -0.94051300 |
| O  | -0.15796500 | -1.50120300 | -1.57989700 |
| C  | -0.23894600 | -1.42467700 | 2.63684800  |
| C  | -1.52413000 | -1.35593600 | 3.18478500  |
| C  | 0.86596700  | -1.08119800 | 3.42865200  |
| C  | -1.70211800 | -0.93901400 | 4.50522700  |
| H  | -2.37463400 | -1.60503700 | 2.56068500  |
| C  | 0.68534800  | -0.66089100 | 4.74518900  |
| H  | 1.87104100  | -1.13897400 | 3.01786100  |
| C  | -0.60020700 | -0.58699800 | 5.28700500  |
| H  | -2.70462700 | -0.89224400 | 4.92234900  |
| H  | 1.55040900  | -0.39677700 | 5.34590000  |
| H  | -0.74062000 | -0.26697600 | 6.31616300  |

|   |             |             |             |
|---|-------------|-------------|-------------|
| C | -0.18817900 | -4.37457000 | 1.18667400  |
| C | -0.04909200 | -5.34547100 | 2.18210300  |
| C | -1.22418500 | -4.48700700 | 0.24962700  |
| C | -0.93430500 | -6.42240100 | 2.24507200  |
| H | 0.75002900  | -5.25293300 | 2.91357800  |
| C | -2.10760700 | -5.56372400 | 0.31473600  |
| H | -1.37846900 | -3.72496100 | -0.50942500 |
| C | -1.96465600 | -6.53330600 | 1.30964000  |
| H | -0.82154000 | -7.16999000 | 3.02552400  |
| H | -2.91611400 | -5.62589900 | -0.40740900 |
| H | -2.65841300 | -7.36804900 | 1.36176200  |
| C | 3.52844800  | -3.04654600 | -1.44423200 |
| O | 2.84406100  | -3.66861100 | -2.26642000 |
| N | 4.81464100  | -2.69269000 | -1.67729300 |
| C | 5.62010900  | -1.80654200 | -0.80508000 |
| C | 5.48095100  | -3.22433000 | -2.89716400 |
| H | 6.51381400  | -2.87885900 | -2.81475900 |
| C | 4.90281100  | -2.63866500 | -4.18952000 |
| C | 2.39448500  | 2.55864000  | 5.41460200  |
| H | 2.33245200  | 3.65300900  | 5.44162000  |
| H | 1.40627600  | 2.16896900  | 5.68621900  |
| H | 3.10585900  | 2.24308100  | 6.18391300  |
| C | 5.52228500  | -0.11353700 | 2.46336200  |
| H | 6.13686800  | -0.11821000 | 3.36876900  |
| H | 5.20191200  | -1.14031600 | 2.25673400  |
| H | 6.15378900  | 0.20685500  | 1.62663300  |
| C | 3.54844400  | 7.02192500  | 0.51285600  |
| H | 3.90750300  | 7.65662200  | -0.30522800 |
| H | 3.24904400  | 7.68849700  | 1.33150300  |
| H | 4.38900100  | 6.41824300  | 0.86843600  |
| C | -0.91749000 | 6.54290300  | -1.81592400 |
| H | -1.86054700 | 6.02545500  | -1.61089300 |
| H | -1.04990600 | 7.60223700  | -1.57394900 |
| H | -0.73584700 | 6.47454600  | -2.89669900 |
| H | 4.94690000  | -1.47669700 | -0.02282800 |
| H | 4.95128300  | -1.54630400 | -4.17176000 |
| H | 5.48828200  | -2.99343100 | -5.04529100 |
| H | 3.86470700  | -2.94675900 | -4.32234400 |
| C | 5.51708700  | -4.75687300 | -2.90422700 |
| H | 4.51472000  | -5.17315400 | -3.01248500 |
| H | 6.13333600  | -5.10193600 | -3.74184800 |
| H | 5.95837200  | -5.13541400 | -1.97616900 |
| C | 6.10125200  | -0.56458500 | -1.56423900 |
| H | 5.25519900  | -0.02805500 | -2.00327900 |

|   |             |             |             |
|---|-------------|-------------|-------------|
| H | 6.60846200  | 0.10981100  | -0.86505600 |
| H | 6.81331300  | -0.80211900 | -2.36225600 |
| C | 6.76303800  | -2.57848300 | -0.13824200 |
| H | 6.36512400  | -3.41733500 | 0.44126500  |
| H | 7.48300000  | -2.97049400 | -0.86541400 |
| H | 7.30842600  | -1.91865300 | 0.54490100  |
| C | -7.02004300 | -0.97622000 | 0.41054800  |
| C | -5.70290500 | -0.56580400 | 0.21687700  |
| C | -5.08143000 | 0.29640100  | 1.14120700  |
| C | -5.78216400 | 0.69713200  | 2.28378900  |
| C | -7.09850700 | 0.28151400  | 2.48109300  |
| C | -7.71971500 | -0.53798200 | 1.53571900  |
| H | -7.47953100 | -1.63908300 | -0.31343200 |
| H | -5.30563500 | 1.36826400  | 2.99148700  |
| H | -7.64250500 | 0.60681600  | 3.36287900  |
| H | -8.74872500 | -0.85305700 | 1.68181500  |
| C | -3.75974800 | 0.82183400  | 0.78882000  |
| H | -3.65577400 | 1.09194500  | -0.25847700 |
| O | -2.99742300 | -1.01506100 | 0.42300300  |
| C | -3.57060700 | -1.58533500 | -0.57766100 |
| O | -3.12360200 | -2.45931200 | -1.30494900 |
| N | -4.92422700 | -1.07963600 | -0.85172500 |
| S | -5.29979400 | -0.67585600 | -2.47774900 |
| C | -3.91197700 | 0.37710400  | -2.89741400 |
| C | -2.68928800 | -0.19384400 | -3.26089400 |
| C | -4.05816400 | 1.76043700  | -2.77922700 |
| C | -1.60424900 | 0.64347400  | -3.50040000 |
| H | -2.58490200 | -1.26909700 | -3.31845300 |
| C | -2.95901500 | 2.58115000  | -3.03530600 |
| H | -5.02140300 | 2.17630700  | -2.50386500 |
| C | -1.72039000 | 2.03669800  | -3.40210300 |
| H | -0.64837300 | 0.20200100  | -3.76181200 |
| H | -3.07052300 | 3.66079100  | -2.96758700 |
| O | -6.50438000 | 0.15515500  | -2.39443300 |
| O | -5.26547700 | -1.86542100 | -3.31804300 |
| C | -0.53635200 | 2.91634300  | -3.71826700 |
| H | -0.21445800 | 2.77682700  | -4.75749800 |
| H | -0.77232800 | 3.97561000  | -3.58051600 |
| H | 0.32135700  | 2.67520700  | -3.08256600 |
| C | -2.90767600 | 1.52167200  | 1.66949800  |
| H | -2.95843100 | 1.30655600  | 2.73318000  |
| C | -2.14850700 | 2.65256800  | 1.21402300  |
| H | -2.42610700 | 3.10336600  | 0.25983700  |
| H | -1.82340200 | 3.38008500  | 1.95718600  |

**M2R**

|    |             |             |             |
|----|-------------|-------------|-------------|
| C  | 0.82892600  | -2.98381900 | 0.89433200  |
| C  | -0.30158500 | -1.92801300 | 0.73740700  |
| H  | 1.46198300  | -2.65798700 | 1.72512000  |
| N  | 1.71944100  | -3.03116300 | -0.26229200 |
| N  | 0.27461000  | -0.63002200 | 0.29189700  |
| H  | 1.11342000  | -0.41243500 | 0.83196600  |
| C  | 1.51933100  | 0.62156000  | -1.45763700 |
| C  | 1.75225400  | 1.82168400  | -0.74906300 |
| C  | 2.72219200  | 2.71623000  | -1.22477200 |
| C  | 3.44883100  | 2.43991600  | -2.38082700 |
| C  | 3.20232800  | 1.26316900  | -3.08861900 |
| C  | 2.24697100  | 0.36252900  | -2.62670400 |
| P  | 0.76102300  | 2.31016000  | 0.72007900  |
| H  | 2.89038500  | 3.64863300  | -0.69601800 |
| H  | 4.19137100  | 3.14924600  | -2.73412100 |
| H  | 3.74747900  | 1.04835400  | -4.00155400 |
| H  | 2.04596600  | -0.56195200 | -3.15636200 |
| Pd | -1.15638200 | 1.11366800  | 0.78773500  |
| C  | 1.77054500  | 1.85916300  | 2.16956700  |
| C  | 2.96570600  | 1.15063100  | 2.04258800  |
| C  | 3.62300800  | 0.65695000  | 3.18136300  |
| C  | 3.07101100  | 0.91666000  | 4.43565700  |
| C  | 1.87919700  | 1.64508100  | 4.58868300  |
| C  | 1.22861500  | 2.10013900  | 3.44450800  |
| H  | 3.37710300  | 0.93710700  | 1.06315800  |
| H  | 3.57038200  | 0.53231900  | 5.32254100  |
| H  | 0.27930800  | 2.62109000  | 3.53758300  |
| C  | 0.71359700  | 4.12688200  | 0.66273100  |
| C  | -0.20849700 | 4.72059400  | -0.20479100 |
| C  | -0.25966300 | 6.11279900  | -0.34192700 |
| C  | 0.61737100  | 6.88844800  | 0.42269900  |
| C  | 1.53813100  | 6.31542100  | 1.31073400  |
| C  | 1.58252600  | 4.92280000  | 1.42060300  |
| H  | -0.88111100 | 4.09124400  | -0.78031600 |
| H  | 0.58125700  | 7.97175200  | 0.32801000  |
| H  | 2.29320700  | 4.45658500  | 2.09618400  |
| C  | 2.85473300  | -2.31989100 | -0.31760900 |
| O  | 3.18840100  | -1.49801000 | 0.55076900  |
| H  | 1.46449600  | -3.55421800 | -1.09454800 |
| H  | -1.02205400 | -2.23623500 | -0.02346300 |
| C  | 0.52959300  | -0.45669300 | -1.09477300 |
| O  | 0.00405200  | -1.14345500 | -1.94215200 |

|   |             |             |             |
|---|-------------|-------------|-------------|
| C | -1.00115600 | -1.74172500 | 2.06607400  |
| C | -2.27808100 | -2.27682700 | 2.25810700  |
| C | -0.36378500 | -1.07295700 | 3.12356400  |
| C | -2.90984900 | -2.13805900 | 3.49563500  |
| H | -2.76675400 | -2.77636700 | 1.42733100  |
| C | -1.00667300 | -0.91818600 | 4.35038600  |
| H | 0.63723500  | -0.66891300 | 3.00079200  |
| C | -2.28352700 | -1.45422200 | 4.53865500  |
| H | -3.90161900 | -2.55504200 | 3.63395500  |
| H | -0.50560400 | -0.39168800 | 5.15778700  |
| H | -2.78293800 | -1.34710000 | 5.49810900  |
| C | 0.29175700  | -4.36716000 | 1.19956600  |
| C | 0.81744100  | -5.07930400 | 2.28260100  |
| C | -0.70044700 | -4.95152300 | 0.40187700  |
| C | 0.36210600  | -6.36465500 | 2.57347900  |
| H | 1.58449900  | -4.62147300 | 2.90297700  |
| C | -1.15215700 | -6.23887100 | 0.69633000  |
| H | -1.16646500 | -4.39677900 | -0.40973400 |
| C | -0.62408100 | -6.94832600 | 1.77619000  |
| H | 0.77387600  | -6.90674700 | 3.42042000  |
| H | -1.93038300 | -6.67994500 | 0.08026200  |
| H | -0.98402300 | -7.94872500 | 2.00106200  |
| C | 3.63428700  | -2.62634400 | -1.62342900 |
| O | 2.97234500  | -3.11384100 | -2.54631900 |
| N | 4.95806200  | -2.35359100 | -1.71612700 |
| C | 5.78548200  | -1.80911300 | -0.61380300 |
| C | 5.64288600  | -2.61998300 | -3.01044400 |
| H | 6.67101500  | -2.28790900 | -2.85066200 |
| C | 5.07597800  | -1.77750400 | -4.15753400 |
| C | 1.31449600  | 1.91386900  | 5.96227600  |
| H | 1.85349400  | 2.73019100  | 6.46001600  |
| H | 0.25878400  | 2.19749100  | 5.90946100  |
| H | 1.39845100  | 1.03168800  | 6.60639000  |
| C | 4.87193500  | -0.17341400 | 3.02791300  |
| H | 5.36279600  | -0.34404500 | 3.99074100  |
| H | 4.62028500  | -1.14253900 | 2.58411600  |
| H | 5.59019200  | 0.30999800  | 2.35579400  |
| C | 2.45122200  | 7.18726800  | 2.13837100  |
| H | 2.90236500  | 7.98075300  | 1.53235400  |
| H | 1.89971900  | 7.67529000  | 2.95191900  |
| H | 3.25868600  | 6.60298000  | 2.58995000  |
| C | -1.23603500 | 6.74880100  | -1.30112400 |
| H | -2.25916700 | 6.40284200  | -1.11421800 |
| H | -1.22765900 | 7.83934900  | -1.21657900 |



|   |             |             |             |
|---|-------------|-------------|-------------|
| H | -0.99222000 | 6.49005300  | -2.33863300 |
| H | 5.14992900  | -1.80448600 | 0.26429200  |
| H | 5.12191400  | -0.71397400 | -3.90579700 |
| H | 5.67664600  | -1.94150800 | -5.05905700 |
| H | 4.04200300  | -2.05054600 | -4.37219500 |
| C | 5.68352900  | -4.11705100 | -3.33861300 |
| H | 4.67970200  | -4.49884200 | -3.53034100 |
| H | 6.29847600  | -4.27978900 | -4.23075100 |
| H | 6.12478100  | -4.68324000 | -2.51195200 |
| C | 6.17451400  | -0.35540600 | -0.90143700 |
| H | 5.27667400  | 0.25310200  | -1.04611600 |
| H | 6.74116000  | 0.05502400  | -0.05787000 |
| H | 6.80086300  | -0.26673100 | -1.79672600 |
| C | 6.99389700  | -2.70261000 | -0.31074000 |
| H | 6.67671300  | -3.73272500 | -0.12002200 |
| H | 7.73342100  | -2.71349100 | -1.11801300 |
| H | 7.49683800  | -2.32902100 | 0.58783800  |
| C | -5.55634400 | -2.50226500 | -0.30229200 |
| C | -4.72097200 | -1.38713500 | -0.40173700 |
| C | -4.61114200 | -0.49762500 | 0.69021500  |
| C | -5.37145500 | -0.74592100 | 1.84936000  |
| C | -6.20313300 | -1.85293500 | 1.93544600  |
| C | -6.28860500 | -2.74057400 | 0.85597700  |
| H | -5.60661100 | -3.18254400 | -1.14461000 |
| H | -5.31890700 | -0.04741200 | 2.67832200  |
| H | -6.79135000 | -2.02239900 | 2.83274400  |
| H | -6.93710900 | -3.60987100 | 0.91503400  |
| C | -3.77775900 | 0.68370900  | 0.57876100  |
| H | -3.60335000 | 1.05049300  | -0.42549600 |
| O | -2.69363900 | -3.02859700 | -0.92168900 |
| C | -2.93794300 | -2.31745400 | -1.92318600 |
| O | -2.52793400 | -2.32335000 | -3.07823700 |
| N | -3.93168700 | -1.21214700 | -1.57593100 |
| S | -4.51869000 | -0.13848700 | -2.75300500 |
| C | -3.12841300 | 0.96952000  | -3.04021900 |
| C | -1.95086300 | 0.51852600  | -3.63662400 |
| C | -3.28292500 | 2.31158400  | -2.68131900 |
| C | -0.91172500 | 1.42615500  | -3.83780800 |
| H | -1.85250500 | -0.52928700 | -3.89394900 |
| C | -2.23639600 | 3.20456000  | -2.90650800 |
| H | -4.22229200 | 2.64119300  | -2.25101000 |
| C | -1.03019000 | 2.77396600  | -3.47968800 |
| H | 0.01232800  | 1.07538700  | -4.28704600 |
| H | -2.37002900 | 4.25519100  | -2.65923400 |

|   |             |             |             |
|---|-------------|-------------|-------------|
| O | -5.54366000 | 0.66500500  | -2.06242500 |
| O | -4.85639900 | -0.81166300 | -4.00400100 |
| C | 0.10360800  | 3.74197500  | -3.71548200 |
| H | 0.92382200  | 3.26514600  | -4.25933300 |
| H | -0.22895500 | 4.61160700  | -4.29556500 |
| H | 0.51377600  | 4.11779500  | -2.77047300 |
| C | -3.30559300 | 1.45847500  | 1.62169000  |
| H | -3.43352200 | 1.12315400  | 2.64839500  |
| C | -2.47506000 | 2.60266000  | 1.34737700  |
| H | -2.67772000 | 3.17247800  | 0.44097900  |
| H | -2.14919400 | 3.21589000  | 2.18477000  |

**TS2R**

|    |             |             |             |
|----|-------------|-------------|-------------|
| C  | -0.37674900 | 3.10014200  | 0.86603300  |
| C  | 0.61564700  | 1.90444300  | 0.72758900  |
| H  | -1.04196800 | 2.86084500  | 1.70040700  |
| N  | -1.25161900 | 3.24380600  | -0.29089000 |
| N  | -0.12211100 | 0.68917700  | 0.29625600  |
| H  | -0.99177000 | 0.59446400  | 0.82261000  |
| C  | -1.48763100 | -0.39311000 | -1.48073100 |
| C  | -1.89717800 | -1.55616900 | -0.78788000 |
| C  | -2.94409900 | -2.32515100 | -1.31641300 |
| C  | -3.57721200 | -1.96221600 | -2.50351300 |
| C  | -3.16535100 | -0.81831300 | -3.18706800 |
| C  | -2.13013100 | -0.04139400 | -2.67533700 |
| P  | -1.04516800 | -2.15817300 | 0.72836800  |
| H  | -3.24915400 | -3.23162200 | -0.80435800 |
| H  | -4.37954200 | -2.57935400 | -2.89702700 |
| H  | -3.63944200 | -0.53620000 | -4.12110200 |
| H  | -1.79336700 | 0.85125500  | -3.19032100 |
| Pd | 1.03258000  | -1.26333800 | 0.84802800  |
| C  | -2.03840700 | -1.52561600 | 2.12414100  |
| C  | -3.17411700 | -0.73752000 | 1.94193200  |
| C  | -3.82292400 | -0.16073700 | 3.04604000  |
| C  | -3.32741600 | -0.42088300 | 4.32317500  |
| C  | -2.19545700 | -1.22687100 | 4.53274200  |
| C  | -1.54968800 | -1.76289300 | 3.42175800  |
| H  | -3.54301600 | -0.53023400 | 0.94439700  |
| H  | -3.82336500 | 0.02427300  | 5.18328500  |
| H  | -0.64433500 | -2.34946600 | 3.55553000  |
| C  | -1.29673700 | -3.96138600 | 0.73370600  |
| C  | -0.41391200 | -4.74829700 | -0.01219400 |
| C  | -0.57632300 | -6.13805800 | -0.07087300 |
| C  | -1.62819000 | -6.71605200 | 0.64589300  |

|   |             |             |             |
|---|-------------|-------------|-------------|
| C | -2.51806600 | -5.94853300 | 1.41002600  |
| C | -2.34497200 | -4.56255300 | 1.44447300  |
| H | 0.39536000  | -4.27437800 | -0.55923400 |
| H | -1.75761900 | -7.79592100 | 0.61299200  |
| H | -3.02524100 | -3.94967600 | 2.02785100  |
| C | -2.46439900 | 2.66993300  | -0.34173400 |
| O | -2.89582900 | 1.91595200  | 0.54324700  |
| H | -0.94270600 | 3.72271300  | -1.13122800 |
| H | 1.36047200  | 2.10885800  | -0.04154300 |
| C | -0.36846600 | 0.53732800  | -1.09162600 |
| O | 0.26791000  | 1.14157200  | -1.92914300 |
| C | 1.28212000  | 1.67275500  | 2.06424000  |
| C | 2.57133600  | 2.15806800  | 2.29346300  |
| C | 0.58484600  | 1.04723500  | 3.10938100  |
| C | 3.15403400  | 2.02135600  | 3.55470600  |
| H | 3.11597400  | 2.63149000  | 1.48300200  |
| C | 1.17825900  | 0.88893100  | 4.36025600  |
| H | -0.42604800 | 0.68246600  | 2.95907100  |
| C | 2.46611900  | 1.38170900  | 4.58620200  |
| H | 4.15618300  | 2.40155700  | 3.71917500  |
| H | 0.62942700  | 0.39452100  | 5.15694300  |
| H | 2.92783800  | 1.27319500  | 5.56392600  |
| C | 0.34049500  | 4.39901700  | 1.16362500  |
| C | 0.06049600  | 5.08792300  | 2.34719700  |
| C | 1.28721300  | 4.91683000  | 0.27167500  |
| C | 0.71626500  | 6.28295200  | 2.64217300  |
| H | -0.66760200 | 4.68044300  | 3.04409500  |
| C | 1.94056400  | 6.11311200  | 0.56728000  |
| H | 1.55515700  | 4.37329700  | -0.62919700 |
| C | 1.65711900  | 6.79912000  | 1.74976600  |
| H | 0.49447300  | 6.80749100  | 3.56738400  |
| H | 2.68102000  | 6.50060200  | -0.12626300 |
| H | 2.17181900  | 7.72826300  | 1.97823000  |
| C | -3.18750700 | 3.04853000  | -1.66417100 |
| O | -2.46261600 | 3.49020200  | -2.56370900 |
| N | -4.52641800 | 2.89786900  | -1.79444500 |
| C | -5.42829300 | 2.37986200  | -0.73881000 |
| C | -5.15647300 | 3.29658000  | -3.08347000 |
| H | -6.21858500 | 3.08201400  | -2.94685800 |
| C | -4.67319600 | 2.44189700  | -4.25943700 |
| C | -1.68770600 | -1.48806200 | 5.92985900  |
| H | -2.36159800 | -2.15790000 | 6.47869300  |
| H | -0.69779100 | -1.95423400 | 5.91213600  |
| H | -1.61581600 | -0.55932200 | 6.50733000  |

|   |             |             |             |
|---|-------------|-------------|-------------|
| C | -4.99778000 | 0.75980100  | 2.83391600  |
| H | -5.54592700 | 0.93542000  | 3.76450000  |
| H | -4.64836500 | 1.72444100  | 2.44896900  |
| H | -5.69632600 | 0.35107300  | 2.09512300  |
| C | -3.62757400 | -6.61046700 | 2.19091500  |
| H | -4.15844700 | -7.35028600 | 1.58143000  |
| H | -3.23223200 | -7.13797200 | 3.06820200  |
| H | -4.35693300 | -5.87655300 | 2.54689600  |
| C | 0.36070300  | -6.98022900 | -0.90164800 |
| H | 1.40766700  | -6.73267700 | -0.69407600 |
| H | 0.21911900  | -8.04733100 | -0.70677900 |
| H | 0.19516700  | -6.80997300 | -1.97251700 |
| H | -4.80248600 | 2.20686600  | 0.12881500  |
| H | -4.83919400 | 1.38072300  | -4.05200600 |
| H | -5.24049000 | 2.70716400  | -5.15844800 |
| H | -3.61261700 | 2.60635900  | -4.45434200 |
| C | -5.01990300 | 4.80089200  | -3.34470200 |
| H | -3.97695200 | 5.07281000  | -3.51214400 |
| H | -5.60143300 | 5.07189500  | -4.23285800 |
| H | -5.40389500 | 5.37680400  | -2.49629700 |
| C | -6.02450400 | 1.02886500  | -1.14888100 |
| H | -5.22846600 | 0.30900000  | -1.36163100 |
| H | -6.64106200 | 0.63355300  | -0.33370000 |
| H | -6.66275500 | 1.10924300  | -2.03612600 |
| C | -6.49686300 | 3.40860400  | -0.35199900 |
| H | -6.03379400 | 4.35736300  | -0.06227900 |
| H | -7.21113400 | 3.60691100  | -1.15832500 |
| H | -7.06623000 | 3.03149200  | 0.50462300  |
| C | 5.59725400  | 1.89937900  | -0.39885800 |
| C | 4.72688200  | 0.79908200  | -0.48280700 |
| C | 4.54634800  | -0.00075600 | 0.68240300  |
| C | 5.27954400  | 0.29145100  | 1.84986900  |
| C | 6.15216800  | 1.36600400  | 1.89857000  |
| C | 6.29549700  | 2.18311000  | 0.76829200  |
| H | 5.71663400  | 2.51862600  | -1.27974500 |
| H | 5.16613200  | -0.34781300 | 2.72003700  |
| H | 6.72229000  | 1.56846300  | 2.80066000  |
| H | 6.97546300  | 3.03043600  | 0.79398700  |
| C | 3.64351900  | -1.12511700 | 0.62977800  |
| H | 3.42211000  | -1.50835100 | -0.35782200 |
| O | 2.97553700  | 2.86398800  | -1.36862000 |
| C | 3.03130400  | 2.14081500  | -2.33374100 |
| O | 2.75350900  | 1.95211600  | -3.47650500 |
| N | 4.00030400  | 0.58320100  | -1.66174700 |

|   |             |             |             |
|---|-------------|-------------|-------------|
| S | 4.46777800  | -0.64320600 | -2.65297900 |
| C | 2.96920500  | -1.62688900 | -2.86874400 |
| C | 1.82973100  | -1.07153100 | -3.45207000 |
| C | 2.98984500  | -2.97175500 | -2.49446000 |
| C | 0.70560500  | -1.87325000 | -3.64085600 |
| H | 1.82873000  | -0.02996900 | -3.74843200 |
| C | 1.85704900  | -3.76133700 | -2.69772400 |
| H | 3.89925300  | -3.38521700 | -2.07131300 |
| C | 0.69614900  | -3.22449700 | -3.27207900 |
| H | -0.18020000 | -1.44373300 | -4.09879300 |
| H | 1.88932000  | -4.81734600 | -2.43821900 |
| O | 5.42000300  | -1.52281900 | -1.93949500 |
| O | 4.82557100  | -0.14449700 | -3.98471500 |
| C | -0.52643500 | -4.07997600 | -3.50170700 |
| H | -0.26327900 | -5.03371600 | -3.97465100 |
| H | -1.03774100 | -4.31298900 | -2.55970900 |
| H | -1.24924400 | -3.57015100 | -4.14550900 |
| C | 3.10841100  | -1.82825600 | 1.69959900  |
| H | 3.27731000  | -1.48915500 | 2.71912300  |
| C | 2.16957400  | -2.88841100 | 1.44917000  |
| H | 2.30776600  | -3.48738800 | 0.54949500  |
| H | 1.77629100  | -3.44717000 | 2.29623900  |

### M3R

|    |             |             |             |
|----|-------------|-------------|-------------|
| C  | -2.18303800 | -2.11675100 | 1.12118300  |
| C  | -1.74352300 | -0.59733300 | 1.07016100  |
| H  | -1.96013200 | -2.48129300 | 2.12740300  |
| N  | -1.44578100 | -2.97557400 | 0.20657800  |
| N  | -0.40211800 | -0.39010900 | 0.50437600  |
| H  | 0.31910400  | -0.85886700 | 1.05162000  |
| C  | 1.16209900  | -0.78106500 | -1.37916800 |
| C  | 2.30110900  | -0.10324300 | -0.88730600 |
| C  | 3.54489000  | -0.35030800 | -1.48853300 |
| C  | 3.66677000  | -1.23433500 | -2.55872000 |
| C  | 2.53605700  | -1.88551400 | -3.05242500 |
| C  | 1.29678100  | -1.66059900 | -2.46274600 |
| P  | 2.19773100  | 1.20984700  | 0.40315800  |
| H  | 4.42135800  | 0.18066000  | -1.13238700 |
| H  | 4.63960300  | -1.40128100 | -3.01204000 |
| H  | 2.61551000  | -2.56143700 | -3.89735600 |
| H  | 0.40716300  | -2.16006800 | -2.82640400 |
| Pd | 0.06303200  | 1.90816800  | 0.76460200  |
| C  | 2.74482100  | 0.42723400  | 1.95962900  |
| C  | 2.90372000  | -0.95404000 | 2.08995900  |

|   |             |             |             |
|---|-------------|-------------|-------------|
| C | 3.07390000  | -1.53283500 | 3.35874100  |
| C | 3.11200500  | -0.69777200 | 4.47580400  |
| C | 2.97709300  | 0.69539300  | 4.36769100  |
| C | 2.77786300  | 1.24428500  | 3.10325500  |
| H | 2.86240800  | -1.59256500 | 1.21365400  |
| H | 3.23500900  | -1.14108400 | 5.46152700  |
| H | 2.61162100  | 2.31352100  | 3.00166100  |
| C | 3.49964200  | 2.37750400  | -0.10431600 |
| C | 3.19969500  | 3.20871100  | -1.19004100 |
| C | 4.15989900  | 4.08876900  | -1.69883800 |
| C | 5.41263600  | 4.13739100  | -1.07674100 |
| C | 5.72702700  | 3.33160100  | 0.02504600  |
| C | 4.75950200  | 2.44001100  | 0.50111700  |
| H | 2.21543300  | 3.15315200  | -1.64898000 |
| H | 6.16497700  | 4.82396100  | -1.45921000 |
| H | 4.98896900  | 1.79205100  | 1.34209700  |
| C | -0.20414400 | -3.41172200 | 0.45619000  |
| O | 0.44680800  | -3.06835000 | 1.45617700  |
| H | -1.85121800 | -3.25624600 | -0.68082000 |
| H | -2.41915600 | -0.06481000 | 0.40207100  |
| C | -0.24731900 | -0.63975800 | -0.87554100 |
| O | -1.19948400 | -0.78077300 | -1.61573900 |
| C | -1.83574500 | -0.01271000 | 2.46333000  |
| C | -3.08233100 | 0.42139000  | 2.92419100  |
| C | -0.72908100 | 0.05955400  | 3.32321000  |
| C | -3.21725700 | 0.94913900  | 4.20862500  |
| H | -3.94405800 | 0.36484500  | 2.26999600  |
| C | -0.86298100 | 0.59797400  | 4.60286700  |
| H | 0.24621900  | -0.29883300 | 3.01515100  |
| C | -2.10710300 | 1.04969000  | 5.04832000  |
| H | -4.19100500 | 1.29790800  | 4.53915600  |
| H | 0.00942300  | 0.65755400  | 5.24714700  |
| H | -2.21137800 | 1.46959500  | 6.04511100  |
| C | -3.66769300 | -2.20553000 | 0.84131900  |
| C | -4.55284400 | -2.66603200 | 1.81935500  |
| C | -4.16588500 | -1.76547900 | -0.39316100 |
| C | -5.92618200 | -2.68807000 | 1.56891100  |
| H | -4.16795200 | -2.99454900 | 2.78154100  |
| C | -5.53626100 | -1.79366800 | -0.64276500 |
| H | -3.50393100 | -1.36693100 | -1.15656300 |
| C | -6.41907600 | -2.25345000 | 0.33697500  |
| H | -6.60885100 | -3.04128800 | 2.33694000  |
| H | -5.89615400 | -1.43404500 | -1.60136700 |
| H | -7.48863700 | -2.26580800 | 0.14543400  |

|   |             |             |             |
|---|-------------|-------------|-------------|
| C | 0.25372700  | -4.37382400 | -0.68706100 |
| O | -0.53607500 | -4.50012000 | -1.63153700 |
| N | 1.42237700  | -5.05257100 | -0.61329800 |
| C | 2.46661200  | -4.83275000 | 0.41330500  |
| C | 1.69516100  | -6.09651400 | -1.63869300 |
| H | 2.64633300  | -6.53649100 | -1.33120400 |
| C | 1.89499800  | -5.50994000 | -3.03990700 |
| C | 3.03407100  | 1.57339300  | 5.59401200  |
| H | 4.07132800  | 1.81192900  | 5.86271200  |
| H | 2.50998000  | 2.52014600  | 5.42954400  |
| H | 2.58101100  | 1.07869800  | 6.45978800  |
| C | 3.16747600  | -3.03005800 | 3.50786000  |
| H | 3.42247100  | -3.31402100 | 4.53319000  |
| H | 2.21085200  | -3.49476400 | 3.24648900  |
| H | 3.92954400  | -3.44931300 | 2.84095800  |
| C | 7.07576100  | 3.43491700  | 0.69537700  |
| H | 7.86988100  | 3.63584600  | -0.03142300 |
| H | 7.08980200  | 4.25317400  | 1.42706900  |
| H | 7.32731900  | 2.51361500  | 1.23040400  |
| C | 3.84368300  | 4.94954900  | -2.89808000 |
| H | 2.91327900  | 5.50998700  | -2.75072300 |
| H | 4.64343200  | 5.66876900  | -3.09817100 |
| H | 3.71087900  | 4.33592500  | -3.79775400 |
| H | 2.10397000  | -4.01728000 | 1.02775500  |
| H | 2.68506900  | -4.75381000 | -3.03001700 |
| H | 2.19252100  | -6.30735100 | -3.73020200 |
| H | 0.97297500  | -5.05502900 | -3.40437200 |
| C | 0.64752300  | -7.21500900 | -1.60431400 |
| H | -0.32897400 | -6.84843200 | -1.92338000 |
| H | 0.95601400  | -8.02346600 | -2.27637300 |
| H | 0.55766800  | -7.62628500 | -0.59333600 |
| C | 3.78780300  | -4.38943600 | -0.22604000 |
| H | 3.64089500  | -3.49355500 | -0.83633200 |
| H | 4.51037000  | -4.15145900 | 0.56271300  |
| H | 4.23614200  | -5.16652600 | -0.85501500 |
| C | 2.62330100  | -6.06135800 | 1.31523400  |
| H | 1.66625000  | -6.31404000 | 1.78244800  |
| H | 2.98362600  | -6.94007300 | 0.76875500  |
| H | 3.34580300  | -5.84829700 | 2.11021400  |
| C | -5.34803000 | 1.77177200  | -0.45008600 |
| C | -3.97157000 | 2.14581700  | -0.45853700 |
| C | -3.46778900 | 2.85462300  | 0.69805900  |
| C | -4.30361900 | 3.08236200  | 1.81515800  |
| C | -5.62315700 | 2.68097700  | 1.80217900  |

|   |             |             |             |
|---|-------------|-------------|-------------|
| C | -6.13277800 | 2.02349100  | 0.65563800  |
| H | -5.75568400 | 1.25233500  | -1.30911200 |
| H | -3.89748300 | 3.60878600  | 2.67451100  |
| H | -6.27127000 | 2.87894300  | 2.65040300  |
| H | -7.17172400 | 1.70284100  | 0.64712600  |
| C | -2.12740300 | 3.32512800  | 0.60434000  |
| H | -1.78088100 | 3.46734000  | -0.41812200 |
| N | -3.04971700 | 1.84853700  | -1.39531700 |
| S | -3.43730600 | 1.42622100  | -2.91926100 |
| C | -1.76331600 | 1.46519800  | -3.57888200 |
| C | -1.27115000 | 0.38568200  | -4.30056600 |
| C | -0.95662500 | 2.57923300  | -3.33481300 |
| C | 0.05271800  | 0.40471000  | -4.74734600 |
| H | -1.91022800 | -0.47448900 | -4.46284900 |
| C | 0.36196600  | 2.58263500  | -3.77666800 |
| H | -1.35866100 | 3.42162200  | -2.78398600 |
| C | 0.89479400  | 1.48592100  | -4.47219400 |
| H | 0.44436900  | -0.44866600 | -5.29526400 |
| H | 0.98958800  | 3.45058100  | -3.58570700 |
| O | -4.22651200 | 2.47169500  | -3.60462400 |
| O | -3.93449300 | 0.03430600  | -3.05005000 |
| C | 2.34608200  | 1.48175600  | -4.88678000 |
| H | 2.60696000  | 0.56228000  | -5.41948100 |
| H | 2.57967800  | 2.32901700  | -5.54414300 |
| H | 3.00369200  | 1.55534600  | -4.01138200 |
| C | -1.21033000 | 3.59489200  | 1.62587700  |
| H | -1.48412000 | 3.40781700  | 2.66220100  |
| C | 0.14484300  | 3.92871500  | 1.29543400  |
| H | 0.34450900  | 4.47444800  | 0.37320700  |
| H | 0.83591000  | 4.15886100  | 2.10389400  |

### MIS

|   |             |             |             |
|---|-------------|-------------|-------------|
| C | -3.38933700 | 2.57442600  | 0.57006800  |
| C | -2.14331500 | 2.54648300  | -0.37420400 |
| H | -3.06431700 | 2.22285300  | 1.55349800  |
| N | -4.43268700 | 1.65803200  | 0.13492700  |
| N | -1.82875700 | 1.15916200  | -0.75358500 |
| H | -1.87908200 | 0.51434200  | 0.03393100  |
| C | -2.59031400 | -0.82011800 | -2.06154000 |
| C | -1.63521400 | -1.80113700 | -1.69486900 |
| C | -1.91439700 | -3.14119300 | -2.00325000 |
| C | -3.10022300 | -3.51795300 | -2.63241700 |
| C | -4.04120400 | -2.54840000 | -2.97462800 |
| C | -3.78013500 | -1.21145700 | -2.69323700 |



|    |             |             |             |
|----|-------------|-------------|-------------|
| P  | -0.00881200 | -1.30901900 | -0.95239900 |
| H  | -1.17889800 | -3.90289000 | -1.77456600 |
| H  | -3.27991000 | -4.56496600 | -2.86051900 |
| H  | -4.96474600 | -2.82510900 | -3.47245600 |
| H  | -4.49215500 | -0.44046500 | -2.96279200 |
| Pd | 0.45559000  | 0.87812000  | -1.51268500 |
| C  | -0.27238900 | -1.54641400 | 0.85467600  |
| C  | -1.22135800 | -2.41975500 | 1.39947800  |
| C  | -1.36291100 | -2.54040200 | 2.78684200  |
| C  | -0.55386600 | -1.75625700 | 3.61500500  |
| C  | 0.38787900  | -0.85893900 | 3.09817200  |
| C  | 0.53238500  | -0.77628600 | 1.70916300  |
| H  | -1.86617700 | -2.99882200 | 0.74476100  |
| H  | -0.66893200 | -1.83695000 | 4.69448300  |
| H  | 1.26149100  | -0.09138800 | 1.28488800  |
| C  | 1.12603100  | -2.69088300 | -1.38310000 |
| C  | 2.12960300  | -2.41298500 | -2.31369700 |
| C  | 3.06345400  | -3.39117500 | -2.68485400 |
| C  | 2.95831200  | -4.66093200 | -2.11224300 |
| C  | 1.96091800  | -4.96837700 | -1.17327000 |
| C  | 1.06103600  | -3.96736700 | -0.80380100 |
| H  | 2.18259300  | -1.41472300 | -2.74091600 |
| H  | 3.67758400  | -5.42890800 | -2.39025700 |
| H  | 0.31699600  | -4.17667500 | -0.04132600 |
| C  | -4.47993800 | 0.37161100  | 0.52687000  |
| O  | -3.61260000 | -0.15555700 | 1.23326300  |
| H  | -5.16427300 | 1.94547900  | -0.50667200 |
| H  | -2.40070700 | 3.04578000  | -1.30728900 |
| C  | -2.46117300 | 0.67437800  | -1.90608100 |
| O  | -2.94081400 | 1.42743600  | -2.74380600 |
| C  | -0.98040500 | 3.25666100  | 0.27428100  |
| C  | -0.67127200 | 4.56484800  | -0.10679800 |
| C  | -0.21869900 | 2.63620500  | 1.27071000  |
| C  | 0.40132000  | 5.23651200  | 0.48013800  |
| H  | -1.26893600 | 5.05176800  | -0.87234500 |
| C  | 0.86301400  | 3.29888500  | 1.84880100  |
| H  | -0.44675900 | 1.62084600  | 1.57891900  |
| C  | 1.17630600  | 4.59975800  | 1.45117200  |
| H  | 0.63765500  | 6.25058000  | 0.16990300  |
| H  | 1.48281700  | 2.78843100  | 2.57638600  |
| H  | 2.02557200  | 5.11210900  | 1.89429600  |
| C  | -3.92516000 | 3.98442800  | 0.67535900  |
| C  | -3.78716600 | 4.70917900  | 1.86090900  |
| C  | -4.51884600 | 4.59706000  | -0.43576500 |

|   |             |             |             |
|---|-------------|-------------|-------------|
| C | -4.24184700 | 6.02576000  | 1.94183000  |
| H | -3.30908300 | 4.24313000  | 2.71790400  |
| C | -4.98130300 | 5.90975700  | -0.35428400 |
| H | -4.60683800 | 4.05252600  | -1.37362600 |
| C | -4.84299700 | 6.62751700  | 0.83578600  |
| H | -4.12501200 | 6.58054700  | 2.86833800  |
| H | -5.44231900 | 6.37379700  | -1.22143700 |
| H | -5.19804700 | 7.65216800  | 0.89815500  |
| C | -5.76047100 | -0.30033700 | -0.05782000 |
| O | -6.37117700 | 0.36071900  | -0.90963700 |
| N | -6.18549200 | -1.50604400 | 0.38066800  |
| C | -5.45335200 | -2.37496700 | 1.33414700  |
| C | -7.49188000 | -2.01458400 | -0.12065900 |
| H | -7.63562900 | -2.96101700 | 0.40457600  |
| C | -7.46474600 | -2.32791800 | -1.61990500 |
| C | 1.18799300  | 0.03579100  | 4.01205000  |
| H | 0.59315500  | 0.91232600  | 4.30273800  |
| H | 1.46786200  | -0.48283100 | 4.93584600  |
| H | 2.09255700  | 0.39956900  | 3.52186600  |
| C | -2.39092900 | -3.46975900 | 3.38377700  |
| H | -2.06569200 | -3.85419600 | 4.35621700  |
| H | -3.34370500 | -2.94901400 | 3.54040300  |
| H | -2.58667000 | -4.32481100 | 2.72886400  |
| C | 1.88825200  | -6.34631900 | -0.56020300 |
| H | 1.71525800  | -7.11362800 | -1.32455900 |
| H | 2.82412500  | -6.60687500 | -0.05069800 |
| H | 1.07762800  | -6.41347000 | 0.17159500  |
| C | 4.14733200  | -3.06813500 | -3.68496400 |
| H | 4.92171700  | -3.84099900 | -3.70076100 |
| H | 3.73687600  | -2.98603300 | -4.69929700 |
| H | 4.62786900  | -2.11041000 | -3.45396000 |
| H | -4.53228600 | -1.85113100 | 1.56984600  |
| H | -6.66258600 | -3.03489100 | -1.84938100 |
| H | -8.41761300 | -2.78276400 | -1.91360300 |
| H | -7.31394400 | -1.41928300 | -2.20428100 |
| C | -8.65359500 | -1.09667600 | 0.27681500  |
| H | -8.59084300 | -0.13851900 | -0.24037200 |
| H | -9.60262000 | -1.57719500 | 0.01400900  |
| H | -8.64964900 | -0.91618800 | 1.35696600  |
| C | -5.07843600 | -3.70735500 | 0.67571700  |
| H | -4.47440200 | -3.53392800 | -0.21930700 |
| H | -4.49126200 | -4.30712200 | 1.37818100  |
| H | -5.95572300 | -4.29971000 | 0.39301800  |
| C | -6.24635800 | -2.55324400 | 2.63403600  |

|   |             |             |             |
|---|-------------|-------------|-------------|
| H | -6.45825600 | -1.58123200 | 3.09096200  |
| H | -7.19679100 | -3.07602900 | 2.48056900  |
| H | -5.65912800 | -3.14438000 | 3.34484600  |
| C | 7.03608300  | 2.23587300  | -0.89175200 |
| C | 5.74542400  | 1.74564300  | -0.69748200 |
| C | 4.79233000  | 1.79098700  | -1.72131100 |
| C | 5.13505600  | 2.33862300  | -2.95413700 |
| C | 6.43252000  | 2.80739800  | -3.17095300 |
| C | 7.37628600  | 2.74870200  | -2.14428300 |
| H | 7.76023300  | 2.21271700  | -0.08746400 |
| H | 4.38729800  | 2.39750800  | -3.73791100 |
| H | 6.70236500  | 3.22584800  | -4.13588900 |
| H | 8.38291400  | 3.12139200  | -2.30813900 |
| C | 3.44864100  | 1.20890600  | -1.35790500 |
| H | 3.55926200  | 0.12137100  | -1.24121300 |
| O | 3.09257600  | 1.72061600  | -0.03163000 |
| C | 3.95649200  | 1.48178100  | 0.96478500  |
| O | 3.60786500  | 1.45176000  | 2.12600900  |
| N | 5.28048100  | 1.24923600  | 0.55725900  |
| S | 6.28290900  | 0.25749300  | 1.59498100  |
| C | 5.15337300  | -1.07437300 | 1.91727600  |
| C | 4.60009100  | -1.21812600 | 3.18591500  |
| C | 4.80006000  | -1.91903500 | 0.86284300  |
| C | 3.66705200  | -2.23092100 | 3.39437500  |
| H | 4.88162900  | -0.53178400 | 3.97524200  |
| C | 3.85563000  | -2.91298400 | 1.08759900  |
| H | 5.25640900  | -1.79772400 | -0.11408600 |
| C | 3.26676100  | -3.07503900 | 2.35197100  |
| H | 3.22057800  | -2.35015200 | 4.37708700  |
| H | 3.56692800  | -3.56425200 | 0.27172000  |
| O | 7.35145800  | -0.20513000 | 0.71089300  |
| O | 6.58657400  | 0.97081900  | 2.82931200  |
| C | 2.19450600  | -4.10937900 | 2.57325200  |
| H | 2.38695100  | -5.01634400 | 1.99256500  |
| H | 1.22009200  | -3.71579700 | 2.26296200  |
| H | 2.11723200  | -4.38357300 | 3.62986700  |
| C | 2.31151800  | 1.48907200  | -2.30136900 |
| H | 2.45711200  | 1.00989300  | -3.26993500 |
| C | 1.48820000  | 2.62916500  | -2.21722400 |
| H | 1.60966100  | 3.33755500  | -1.40328900 |
| H | 1.00143500  | 3.01012700  | -3.11225000 |

**M1S'**

|   |             |             |            |
|---|-------------|-------------|------------|
| C | -0.26079500 | -2.49625500 | 2.13048500 |
|---|-------------|-------------|------------|

|    |             |             |             |
|----|-------------|-------------|-------------|
| C  | -0.04634300 | -0.93121500 | 2.17147000  |
| H  | 0.60337200  | -2.95825400 | 2.60969000  |
| N  | -0.28993300 | -3.03439200 | 0.78186700  |
| N  | 0.56198000  | -0.41030000 | 0.94906600  |
| H  | 1.53429400  | -0.67799100 | 0.82197600  |
| C  | 0.54504900  | -0.14025800 | -1.48902100 |
| C  | 1.74312400  | 0.60808000  | -1.62804100 |
| C  | 2.32805800  | 0.68630400  | -2.89969700 |
| C  | 1.74500200  | 0.07296400  | -4.00915100 |
| C  | 0.55181600  | -0.63356800 | -3.86677600 |
| C  | -0.03585700 | -0.74211900 | -2.61062700 |
| P  | 2.39753900  | 1.67451600  | -0.25374400 |
| H  | 3.23417100  | 1.26755500  | -3.03027200 |
| H  | 2.21532200  | 0.16605100  | -4.98410300 |
| H  | 0.07259700  | -1.08597000 | -4.72880600 |
| H  | -0.96379000 | -1.28110100 | -2.47323700 |
| Pd | 0.53970000  | 2.04181500  | 1.06516100  |
| C  | 3.70918700  | 0.67258100  | 0.54722700  |
| C  | 4.08469000  | -0.60924900 | 0.13231700  |
| C  | 5.01354400  | -1.35462600 | 0.87394100  |
| C  | 5.57945700  | -0.77634700 | 2.01333100  |
| C  | 5.23006600  | 0.51108100  | 2.44158600  |
| C  | 4.27704100  | 1.21724700  | 1.70833500  |
| H  | 3.65183700  | -1.03413200 | -0.76869600 |
| H  | 6.30557100  | -1.34650700 | 2.58906900  |
| H  | 3.95076700  | 2.19701100  | 2.04916300  |
| C  | 3.32180600  | 2.97262300  | -1.15193100 |
| C  | 2.59340200  | 4.08913600  | -1.57354900 |
| C  | 3.21245800  | 5.11324300  | -2.29996900 |
| C  | 4.57893500  | 5.00258200  | -2.57402900 |
| C  | 5.33470000  | 3.90238000  | -2.14616300 |
| C  | 4.69076100  | 2.88430200  | -1.43803100 |
| H  | 1.53502200  | 4.15319900  | -1.33050500 |
| H  | 5.07163500  | 5.79665300  | -3.13182500 |
| H  | 5.25623700  | 2.01777500  | -1.10716200 |
| C  | 0.84402700  | -3.35326100 | 0.13277200  |
| O  | 1.96747300  | -3.23279700 | 0.63694100  |
| H  | -1.15489800 | -3.10030100 | 0.25776200  |
| H  | -1.02367900 | -0.45748000 | 2.23394700  |
| C  | -0.21018900 | -0.34829500 | -0.20879700 |
| O  | -1.42764300 | -0.51695000 | -0.17547000 |
| C  | 0.78583400  | -0.53677400 | 3.36946200  |
| C  | 0.25997300  | 0.31688200  | 4.34293300  |
| C  | 2.09594600  | -1.01194100 | 3.50942500  |

|   |             |             |             |
|---|-------------|-------------|-------------|
| C | 1.03071700  | 0.69779700  | 5.44163600  |
| H | -0.75659200 | 0.68423200  | 4.23556200  |
| C | 2.86601900  | -0.63250900 | 4.60734400  |
| H | 2.51873300  | -1.67320700 | 2.75726400  |
| C | 2.33680900  | 0.22329400  | 5.57551800  |
| H | 0.61066300  | 1.36134800  | 6.19216800  |
| H | 3.88120200  | -1.00482500 | 4.70124700  |
| H | 2.93744500  | 0.51466100  | 6.43283400  |
| C | -1.51506900 | -2.85321700 | 2.89436600  |
| C | -1.43953200 | -3.62854100 | 4.05392600  |
| C | -2.76079000 | -2.36977900 | 2.47002900  |
| C | -2.59155000 | -3.92416300 | 4.78464700  |
| H | -0.47300100 | -3.99540900 | 4.38906400  |
| C | -3.91067900 | -2.66521000 | 3.20114500  |
| H | -2.82549300 | -1.75924300 | 1.57332500  |
| C | -3.82977800 | -3.44229600 | 4.35933800  |
| H | -2.51995600 | -4.52648800 | 5.68579200  |
| H | -4.86916900 | -2.27760500 | 2.87022000  |
| H | -4.72710100 | -3.66573100 | 4.92937900  |
| C | 0.51757900  | -3.92225200 | -1.28156600 |
| O | -0.68544000 | -4.06027900 | -1.54735600 |
| N | 1.50103100  | -4.29732200 | -2.12707000 |
| C | 2.94061800  | -3.99261000 | -1.94201300 |
| C | 1.13147700  | -5.07061900 | -3.34466600 |
| H | 2.08958900  | -5.33367700 | -3.79779800 |
| C | 0.35694800  | -4.23321700 | -4.36668500 |
| C | 5.83826000  | 1.11585000  | 3.68312800  |
| H | 6.51757400  | 0.41496600  | 4.17865700  |
| H | 6.40683200  | 2.02333800  | 3.44665600  |
| H | 5.05784100  | 1.39737900  | 4.39950100  |
| C | 5.37246800  | -2.76058600 | 0.46427600  |
| H | 6.25021800  | -3.12361900 | 1.00795900  |
| H | 4.53741600  | -3.43993000 | 0.66701000  |
| H | 5.59152300  | -2.81942900 | -0.60804800 |
| C | 6.81583200  | 3.83006500  | -2.43106400 |
| H | 7.04682800  | 4.18393100  | -3.44197900 |
| H | 7.38458500  | 4.45575200  | -1.73088800 |
| H | 7.19031800  | 2.80603800  | -2.33438300 |
| C | 2.41317000  | 6.30509100  | -2.76887200 |
| H | 3.04680600  | 7.03625600  | -3.28027800 |
| H | 1.62097600  | 6.00110600  | -3.46364900 |
| H | 1.92541700  | 6.81049700  | -1.92684900 |
| H | 2.99740500  | -3.36271000 | -1.06234400 |
| H | 0.91397100  | -3.32967200 | -4.62680200 |

|   |             |             |             |
|---|-------------|-------------|-------------|
| H | 0.20642100  | -4.82049600 | -5.27955100 |
| H | -0.61771800 | -3.94238300 | -3.97259300 |
| C | 0.42550700  | -6.38466900 | -2.99210900 |
| H | -0.55923900 | -6.19990500 | -2.56129900 |
| H | 0.30362100  | -6.98511100 | -3.90028600 |
| H | 1.02078900  | -6.96218900 | -2.27700300 |
| C | 3.50050600  | -3.19600400 | -3.12553000 |
| H | 2.92520500  | -2.27992700 | -3.28419900 |
| H | 4.53619400  | -2.91389900 | -2.90548000 |
| H | 3.51062900  | -3.76741600 | -4.05994400 |
| C | 3.73136000  | -5.27113700 | -1.65020900 |
| H | 3.34574700  | -5.75391700 | -0.74699000 |
| H | 3.68130500  | -5.98844000 | -2.47718700 |
| H | 4.78605300  | -5.02882900 | -1.48616700 |
| C | -5.75385100 | 3.81490200  | -0.27123900 |
| C | -4.58634600 | 3.05476700  | -0.17217400 |
| C | -3.70086300 | 3.24775400  | 0.89767200  |
| C | -3.99945000 | 4.18616900  | 1.88125800  |
| C | -5.18740300 | 4.91593000  | 1.81577900  |
| C | -6.05526200 | 4.72795800  | 0.74018500  |
| H | -6.41901200 | 3.69042500  | -1.11358800 |
| H | -3.29506200 | 4.34723500  | 2.69067200  |
| H | -5.42369000 | 5.63988700  | 2.58996500  |
| H | -6.97013600 | 5.30892400  | 0.66984000  |
| C | -2.43971300 | 2.42341800  | 0.84142200  |
| H | -2.67791000 | 1.36845900  | 1.03223500  |
| O | -1.96698700 | 2.47983200  | -0.54492800 |
| C | -2.79543100 | 1.97846400  | -1.47985300 |
| O | -2.38723900 | 1.47568000  | -2.49925300 |
| N | -4.16672100 | 2.11750500  | -1.16947100 |
| S | -5.30261500 | 1.10958300  | -2.04542800 |
| C | -4.80259200 | -0.53094900 | -1.57227800 |
| C | -3.82969000 | -1.21751700 | -2.29627200 |
| C | -5.45181400 | -1.11622300 | -0.48167700 |
| C | -3.48949200 | -2.51040700 | -1.90062000 |
| H | -3.34338400 | -0.73386800 | -3.13385000 |
| C | -5.10722200 | -2.41158900 | -0.11551500 |
| H | -6.22291800 | -0.56644100 | 0.04554800  |
| C | -4.11735300 | -3.12466900 | -0.80891200 |
| H | -2.71334700 | -3.04996100 | -2.43235400 |
| H | -5.61435300 | -2.88429100 | 0.72042600  |
| O | -6.59464900 | 1.37971200  | -1.41468300 |
| O | -5.11190000 | 1.30807800  | -3.47493000 |
| C | -3.76195200 | -4.53020500 | -0.39130900 |

|   |             |             |             |
|---|-------------|-------------|-------------|
| H | -4.47805600 | -5.25159600 | -0.80665900 |
| H | -3.79101800 | -4.63188700 | 0.69897000  |
| H | -2.76465300 | -4.80493500 | -0.74199900 |
| C | -1.31232100 | 2.85433000  | 1.74471200  |
| H | -1.48411400 | 2.61195500  | 2.79288200  |
| C | -0.42456200 | 3.89740900  | 1.41169700  |
| H | -0.53701000 | 4.43368900  | 0.47290100  |
| H | 0.09480000  | 4.43925000  | 2.19924200  |

**TS1S**

|    |             |             |             |
|----|-------------|-------------|-------------|
| C  | -3.21355200 | 2.57282100  | 0.71101600  |
| C  | -1.86782800 | 2.35220400  | -0.06401500 |
| H  | -3.05001600 | 2.25336700  | 1.74265800  |
| N  | -4.30433100 | 1.75483200  | 0.20778100  |
| N  | -1.72608800 | 0.96142500  | -0.52156400 |
| H  | -1.77178100 | 0.29093900  | 0.24392200  |
| C  | -2.56113600 | -0.93133400 | -1.86588800 |
| C  | -1.62948600 | -1.92772500 | -1.47216600 |
| C  | -1.95028300 | -3.26751400 | -1.73054700 |
| C  | -3.13888800 | -3.62721700 | -2.36550800 |
| C  | -4.04021700 | -2.64087200 | -2.76216900 |
| C  | -3.75033500 | -1.30372400 | -2.50770800 |
| P  | 0.04009000  | -1.49680800 | -0.77067900 |
| H  | -1.24499600 | -4.04302500 | -1.45607000 |
| H  | -3.35038600 | -4.67531100 | -2.55778200 |
| H  | -4.96062000 | -2.90659100 | -3.27165000 |
| H  | -4.44008000 | -0.51976000 | -2.79846800 |
| Pd | 0.40457900  | 0.69321700  | -1.49580900 |
| C  | -0.15519300 | -1.72007000 | 1.03494500  |
| C  | -1.37979100 | -2.04386800 | 1.62792900  |
| C  | -1.50159800 | -2.08951500 | 3.02450400  |
| C  | -0.37001300 | -1.83408800 | 3.80032400  |
| C  | 0.87341700  | -1.52449000 | 3.22875800  |
| C  | 0.96783400  | -1.45324100 | 1.83686900  |
| H  | -2.25045000 | -2.24150300 | 1.01201300  |
| H  | -0.45589600 | -1.86637800 | 4.88470900  |
| H  | 1.90940400  | -1.15672700 | 1.38752900  |
| C  | 1.10752000  | -2.90002800 | -1.26645200 |
| C  | 1.95165000  | -2.71960400 | -2.36601200 |
| C  | 2.77266800  | -3.75890600 | -2.82012700 |
| C  | 2.71146900  | -4.99050600 | -2.15908200 |
| C  | 1.88000900  | -5.19589900 | -1.04939800 |
| C  | 1.09529500  | -4.13135100 | -0.59704400 |
| H  | 1.97099600  | -1.75255800 | -2.86307900 |

|   |             |             |             |
|---|-------------|-------------|-------------|
| H | 3.33839900  | -5.80897100 | -2.50727300 |
| H | 0.46590400  | -4.26024100 | 0.27942100  |
| C | -4.52376100 | 0.50853100  | 0.66078500  |
| O | -3.79921300 | -0.03808200 | 1.50161600  |
| H | -4.91501300 | 2.06910400  | -0.53887900 |
| H | -1.88261200 | 2.95562400  | -0.97036500 |
| C | -2.41222800 | 0.55642800  | -1.67628700 |
| O | -2.89773900 | 1.36305500  | -2.45858600 |
| C | -0.69143800 | 2.73849600  | 0.80249100  |
| C | 0.03340500  | 3.89962500  | 0.52568200  |
| C | -0.31023000 | 1.93322200  | 1.88405400  |
| C | 1.14808900  | 4.23575000  | 1.29461800  |
| H | -0.27496600 | 4.53584700  | -0.29983000 |
| C | 0.80753400  | 2.26325400  | 2.64486600  |
| H | -0.86212200 | 1.02695300  | 2.12101900  |
| C | 1.54137100  | 3.41271800  | 2.34900500  |
| H | 1.71615500  | 5.13124200  | 1.05857500  |
| H | 1.12697600  | 1.60508700  | 3.44464300  |
| H | 2.43008300  | 3.64892900  | 2.92606000  |
| C | -3.57266900 | 4.04053300  | 0.66983000  |
| C | -3.47244000 | 4.82933600  | 1.81758800  |
| C | -3.96089900 | 4.63326300  | -0.53916000 |
| C | -3.76646500 | 6.19264200  | 1.76479300  |
| H | -3.15282100 | 4.37504100  | 2.75119600  |
| C | -4.26384100 | 5.99286000  | -0.59078200 |
| H | -4.01113400 | 4.03120500  | -1.44425600 |
| C | -4.16717300 | 6.77566600  | 0.56221000  |
| H | -3.68210000 | 6.79755000  | 2.66301500  |
| H | -4.56837200 | 6.44226800  | -1.53163000 |
| H | -4.39848000 | 7.83619300  | 0.52107200  |
| C | -5.78981900 | -0.08747100 | -0.03045400 |
| O | -6.27499700 | 0.59635800  | -0.94237500 |
| N | -6.33440000 | -1.25289300 | 0.38634700  |
| C | -5.73206600 | -2.15951500 | 1.39340000  |
| C | -7.64248700 | -1.66612700 | -0.19164200 |
| H | -7.89971300 | -2.58159600 | 0.34534000  |
| C | -7.54089400 | -2.02039100 | -1.67858500 |
| C | 2.08192300  | -1.26769000 | 4.09353700  |
| H | 1.78827800  | -0.91082300 | 5.08697200  |
| H | 2.66049700  | -2.18989400 | 4.23380700  |
| H | 2.74125000  | -0.53575100 | 3.62166100  |
| C | -2.83491700 | -2.37476000 | 3.66953000  |
| H | -2.72281400 | -2.60539600 | 4.73359100  |
| H | -3.49636500 | -1.50687300 | 3.57303600  |



|   |             |             |             |
|---|-------------|-------------|-------------|
| H | -3.33751900 | -3.22312500 | 3.19037400  |
| C | 1.81408800  | -6.54596800 | -0.37712800 |
| H | 1.13215800  | -7.21854500 | -0.91357100 |
| H | 2.79527100  | -7.03188500 | -0.35448600 |
| H | 1.45221500  | -6.46144400 | 0.65193800  |
| C | 3.73027600  | -3.53901100 | -3.96579200 |
| H | 4.69167100  | -3.15204000 | -3.60329000 |
| H | 3.93533400  | -4.47089100 | -4.50218300 |
| H | 3.33504600  | -2.81181900 | -4.68264700 |
| H | -4.78010200 | -1.71459800 | 1.65652600  |
| H | -6.79257700 | -2.80214700 | -1.83657500 |
| H | -8.50807000 | -2.39570500 | -2.03160200 |
| H | -7.26812200 | -1.14325000 | -2.26718500 |
| C | -8.74663200 | -0.64424700 | 0.10325900  |
| H | -8.56776100 | 0.29134800  | -0.42804200 |
| H | -9.71247600 | -1.05130700 | -0.21604800 |
| H | -8.80174200 | -0.43606200 | 1.17698200  |
| C | -5.45169700 | -3.54288700 | 0.79637400  |
| H | -4.80833800 | -3.45889800 | -0.08392100 |
| H | -4.93546900 | -4.15881200 | 1.54104800  |
| H | -6.36597200 | -4.07451400 | 0.51016400  |
| C | -6.58583300 | -2.22137800 | 2.66403300  |
| H | -6.72523400 | -1.21834000 | 3.07971200  |
| H | -7.57318900 | -2.66203100 | 2.48630600  |
| H | -6.07978800 | -2.83531200 | 3.41663700  |
| C | 5.77719900  | 3.53117000  | -0.43627100 |
| C | 4.87565700  | 2.49467500  | -0.69630600 |
| C | 3.91400400  | 2.63329100  | -1.72814300 |
| C | 3.84272400  | 3.84464700  | -2.44159400 |
| C | 4.74466700  | 4.86814800  | -2.18194700 |
| C | 5.71938000  | 4.70036900  | -1.19073400 |
| H | 6.49541400  | 3.42770000  | 0.36899200  |
| H | 3.10734300  | 3.94473500  | -3.23191600 |
| H | 4.70094600  | 5.78928700  | -2.75485200 |
| H | 6.42733000  | 5.49851100  | -0.98670100 |
| C | 3.12217700  | 1.47989000  | -2.09163200 |
| H | 3.63378200  | 0.52470400  | -2.00562200 |
| O | 2.50472100  | 1.26386600  | 0.06427000  |
| C | 3.49518500  | 1.06659000  | 0.81174000  |
| O | 3.57706100  | 0.68435700  | 1.97542900  |
| N | 4.79726500  | 1.33479700  | 0.09729000  |
| S | 6.24360100  | 0.65631100  | 0.72268900  |
| C | 5.64065500  | -0.97607700 | 1.10444500  |
| C | 5.69088900  | -1.42628600 | 2.41842400  |

|   |            |             |             |
|---|------------|-------------|-------------|
| C | 5.06369700 | -1.74368800 | 0.09268200  |
| C | 5.12113100 | -2.65902000 | 2.72646800  |
| H | 6.12671500 | -0.79361500 | 3.18234100  |
| C | 4.47592500 | -2.96028100 | 0.42154500  |
| H | 5.04982900 | -1.37965400 | -0.92909000 |
| C | 4.47870500 | -3.42371400 | 1.74579300  |
| H | 5.14263100 | -3.01557000 | 3.75278800  |
| H | 3.99785800 | -3.55028400 | -0.35208600 |
| O | 7.14983100 | 0.59838700  | -0.43089500 |
| O | 6.69888800 | 1.30678100  | 1.95528300  |
| C | 3.75532700 | -4.69516500 | 2.10981900  |
| H | 2.67301900 | -4.51558000 | 2.15159400  |
| H | 4.06966800 | -5.07079700 | 3.08855600  |
| H | 3.92504100 | -5.48240300 | 1.36852400  |
| C | 1.91874000 | 1.49960600  | -2.84147900 |
| H | 1.81252700 | 0.73509800  | -3.61351100 |
| C | 0.87651100 | 2.44107600  | -2.63395900 |
| H | 1.05402300 | 3.28425900  | -1.97377200 |
| H | 0.10434100 | 2.57424400  | -3.38867100 |

## M2S

|    |             |             |             |
|----|-------------|-------------|-------------|
| C  | -3.48287600 | 2.06414400  | 0.88843300  |
| C  | -2.03631900 | 2.23451900  | 0.30317200  |
| H  | -3.37993400 | 1.66075300  | 1.89759900  |
| N  | -4.30572500 | 1.11135200  | 0.16254300  |
| N  | -1.53351600 | 0.97937900  | -0.29667500 |
| H  | -1.50750300 | 0.21073700  | 0.37437700  |
| C  | -2.00696700 | -0.82274300 | -1.94976300 |
| C  | -0.95343000 | -1.71845400 | -1.64274000 |
| C  | -1.04826500 | -3.03385500 | -2.11571700 |
| C  | -2.13773700 | -3.45885600 | -2.87800300 |
| C  | -3.16232300 | -2.56696700 | -3.18593000 |
| C  | -3.09389900 | -1.25690800 | -2.71986700 |
| P  | 0.59181000  | -1.15154400 | -0.77532700 |
| H  | -0.24352800 | -3.73035700 | -1.91372700 |
| H  | -2.17207100 | -4.48254500 | -3.23993600 |
| H  | -4.00612400 | -2.88074100 | -3.79100600 |
| H  | -3.88280100 | -0.54777300 | -2.94042800 |
| Pd | 0.60720400  | 1.17538400  | -1.21724200 |
| C  | 0.25773800  | -1.49121400 | 0.99326800  |
| C  | -0.87274200 | -2.18888200 | 1.43610500  |
| C  | -1.11122500 | -2.35032300 | 2.80789000  |
| C  | -0.19699700 | -1.80632300 | 3.71382300  |
| C  | 0.94622400  | -1.11341300 | 3.29396100  |

|   |             |             |             |
|---|-------------|-------------|-------------|
| C | 1.16468600  | -0.96201300 | 1.92326300  |
| H | -1.58047400 | -2.59407800 | 0.72026900  |
| H | -0.38575300 | -1.91419600 | 4.78037600  |
| H | 2.03305900  | -0.40591300 | 1.59731800  |
| C | 1.82268900  | -2.41505200 | -1.24690500 |
| C | 2.74958800  | -2.11906800 | -2.24525200 |
| C | 3.72697900  | -3.05021800 | -2.62452500 |
| C | 3.72862800  | -4.29666600 | -1.99613500 |
| C | 2.80465900  | -4.62303800 | -0.99053600 |
| C | 1.86258600  | -3.66697500 | -0.61136300 |
| H | 2.76010900  | -1.13572800 | -2.69395600 |
| H | 4.48624800  | -5.02675300 | -2.27315600 |
| H | 1.16850500  | -3.88498100 | 0.19509600  |
| C | -4.35243500 | -0.18970800 | 0.49962600  |
| O | -3.63770800 | -0.68121800 | 1.38013600  |
| H | -4.91800400 | 1.39684000  | -0.59402200 |
| H | -2.08237900 | 2.94475900  | -0.51823300 |
| C | -2.08003700 | 0.62464900  | -1.55115400 |
| O | -2.63066900 | 1.45392600  | -2.26457200 |
| C | -1.10998400 | 2.74713400  | 1.37420600  |
| C | -0.57287200 | 4.03037900  | 1.27359200  |
| C | -0.79997100 | 1.95403100  | 2.48487400  |
| C | 0.28256300  | 4.51516000  | 2.26101300  |
| H | -0.81810500 | 4.64612800  | 0.41211200  |
| C | 0.06001600  | 2.43581700  | 3.46707100  |
| H | -1.21186100 | 0.95198400  | 2.57963400  |
| C | 0.60502000  | 3.71539800  | 3.35558400  |
| H | 0.70819800  | 5.50993900  | 2.16645200  |
| H | 0.31323300  | 1.80853900  | 4.31472000  |
| H | 1.28782600  | 4.08200600  | 4.11624700  |
| C | -4.14950800 | 3.42059400  | 0.93623900  |
| C | -4.36848800 | 4.06344400  | 2.15616500  |
| C | -4.51037700 | 4.06477100  | -0.25469800 |
| C | -4.95248700 | 5.33062300  | 2.19038400  |
| H | -4.06915500 | 3.57422600  | 3.07872400  |
| C | -5.10166300 | 5.32654300  | -0.22083100 |
| H | -4.31376100 | 3.58202300  | -1.20984700 |
| C | -5.32406600 | 5.96212400  | 1.00307300  |
| H | -5.11537600 | 5.82350100  | 3.14450900  |
| H | -5.38208400 | 5.81624100  | -1.14896800 |
| H | -5.77987800 | 6.94772100  | 1.02969100  |
| C | -5.42987300 | -0.91865500 | -0.36352300 |
| O | -5.98924900 | -0.22493000 | -1.22447600 |
| N | -5.75914700 | -2.20893100 | -0.12948200 |

|   |             |             |             |
|---|-------------|-------------|-------------|
| C | -5.02641000 | -3.11664200 | 0.78575500  |
| C | -6.95409600 | -2.76798600 | -0.81908700 |
| H | -7.06255400 | -3.77210300 | -0.40371100 |
| C | -6.74487200 | -2.91490000 | -2.32950200 |
| C | 1.91575200  | -0.52410500 | 4.28719200  |
| H | 1.40160700  | -0.21709500 | 5.20517500  |
| H | 2.67885600  | -1.25871900 | 4.56792100  |
| H | 2.43261600  | 0.33494600  | 3.85081000  |
| C | -2.35427500 | -3.05118300 | 3.29554600  |
| H | -2.23851400 | -3.39942400 | 4.32682100  |
| H | -3.21149100 | -2.37010300 | 3.25774100  |
| H | -2.59614300 | -3.91813800 | 2.67022300  |
| C | 2.85329000  | -5.97455500 | -0.31902500 |
| H | 2.61600200  | -6.77932500 | -1.02586800 |
| H | 3.85258700  | -6.18321700 | 0.08124400  |
| H | 2.13920600  | -6.03378700 | 0.50815300  |
| C | 4.78654300  | -2.66019000 | -3.62229000 |
| H | 5.41900600  | -1.87583100 | -3.19091700 |
| H | 5.41820100  | -3.51195500 | -3.89201700 |
| H | 4.34270000  | -2.25947000 | -4.54119700 |
| H | -4.16197700 | -2.55735200 | 1.12314500  |
| H | -5.86292700 | -3.52737400 | -2.53710100 |
| H | -7.61656300 | -3.40852900 | -2.77365600 |
| H | -6.61760000 | -1.93771500 | -2.79771500 |
| C | -8.23077200 | -1.99535900 | -0.46760600 |
| H | -8.20545300 | -0.98521000 | -0.87815000 |
| H | -9.09813300 | -2.52133200 | -0.88155900 |
| H | -8.35588100 | -1.93261800 | 0.61856100  |
| C | -4.51965200 | -4.36216000 | 0.05039400  |
| H | -3.90167400 | -4.07944300 | -0.80635400 |
| H | -3.90303900 | -4.95461000 | 0.73551100  |
| H | -5.32962000 | -5.01046400 | -0.30172900 |
| C | -5.87309000 | -3.45419600 | 2.01654600  |
| H | -6.15593900 | -2.53815900 | 2.54470400  |
| H | -6.78690000 | -4.00058800 | 1.75699800  |
| H | -5.29563700 | -4.08085800 | 2.70413200  |
| C | 4.87448100  | 3.45220500  | -0.97992000 |
| C | 3.95197700  | 2.43131400  | -1.25045000 |
| C | 3.12233300  | 2.52881200  | -2.37993800 |
| C | 3.27196000  | 3.64196400  | -3.22734000 |
| C | 4.21671800  | 4.63154000  | -2.97501800 |
| C | 5.01885600  | 4.53770500  | -1.83926700 |
| H | 5.47933100  | 3.37567000  | -0.08613800 |
| H | 2.63430500  | 3.71767000  | -4.10233700 |

|   |             |             |             |
|---|-------------|-------------|-------------|
| H | 4.31517000  | 5.47217600  | -3.65589300 |
| H | 5.74842500  | 5.30978400  | -1.61291900 |
| C | 2.07771400  | 1.53755300  | -2.76001700 |
| H | 2.44278800  | 0.61108800  | -3.19049500 |
| O | 1.84541100  | 2.20275500  | 0.53386700  |
| C | 2.94979600  | 1.71817800  | 0.88326600  |
| O | 3.40614800  | 1.48199900  | 2.00421300  |
| N | 3.80748600  | 1.35321500  | -0.30120200 |
| S | 5.27687300  | 0.47111500  | -0.09825300 |
| C | 4.96160100  | -0.75814900 | 1.16063100  |
| C | 5.33327700  | -0.48597500 | 2.47914600  |
| C | 4.49168600  | -2.01198000 | 0.78959800  |
| C | 5.18933700  | -1.48157600 | 3.43641700  |
| H | 5.71328600  | 0.49330300  | 2.73455600  |
| C | 4.33492800  | -2.99365100 | 1.76832200  |
| H | 4.27188800  | -2.21882400 | -0.24601000 |
| C | 4.66900300  | -2.74181600 | 3.10151400  |
| H | 5.47203200  | -1.27643800 | 4.46577400  |
| H | 3.95423200  | -3.96970000 | 1.48576600  |
| O | 5.46025400  | -0.22173500 | -1.38654000 |
| O | 6.37194900  | 1.31371000  | 0.40747700  |
| C | 4.44672300  | -3.78953100 | 4.16334400  |
| H | 3.46323700  | -3.66096700 | 4.63582900  |
| H | 5.19948600  | -3.72551100 | 4.95604100  |
| H | 4.47611100  | -4.79994800 | 3.74267100  |
| C | 0.78549500  | 1.99927300  | -3.17836600 |
| H | 0.18624500  | 1.44409800  | -3.89473000 |
| C | 0.21492200  | 3.01345800  | -2.38535100 |
| H | 0.83823800  | 3.73701400  | -1.87173000 |
| H | -0.83555600 | 3.25495500  | -2.51317300 |

## TS2S

|   |             |             |             |
|---|-------------|-------------|-------------|
| C | -3.55724600 | 2.07334300  | 0.86269600  |
| C | -2.09556000 | 2.19518300  | 0.29282100  |
| H | -3.47287300 | 1.72101400  | 1.89250900  |
| N | -4.38166800 | 1.09475600  | 0.17575100  |
| N | -1.61848700 | 0.93388700  | -0.31002500 |
| H | -1.57683900 | 0.17259800  | 0.36795200  |
| C | -2.08340800 | -0.89253900 | -1.91968600 |
| C | -1.01306700 | -1.76221500 | -1.59129500 |
| C | -1.09395000 | -3.09334500 | -2.02253200 |
| C | -2.18028400 | -3.55660100 | -2.76595000 |
| C | -3.21765600 | -2.68844000 | -3.09966700 |
| C | -3.16688900 | -1.36482500 | -2.67288700 |

|    |             |             |             |
|----|-------------|-------------|-------------|
| P  | 0.55065200  | -1.16014500 | -0.77438000 |
| H  | -0.27856100 | -3.77209800 | -1.80323600 |
| H  | -2.20260100 | -4.59197000 | -3.09393200 |
| H  | -4.05836300 | -3.03253800 | -3.69248200 |
| H  | -3.96776100 | -0.67407400 | -2.90853200 |
| Pd | 0.49239500  | 1.17057300  | -1.25707200 |
| C  | 0.28504800  | -1.49273400 | 1.00783200  |
| C  | -0.88047100 | -2.08340700 | 1.50869000  |
| C  | -1.06772100 | -2.22124700 | 2.89238700  |
| C  | -0.06861500 | -1.75568200 | 3.74972300  |
| C  | 1.11434900  | -1.17416600 | 3.27186800  |
| C  | 1.28228600  | -1.05215000 | 1.89181000  |
| H  | -1.65237000 | -2.43069500 | 0.83017500  |
| H  | -0.21356100 | -1.84477100 | 4.82456400  |
| H  | 2.19330300  | -0.61072400 | 1.50778400  |
| C  | 1.78332000  | -2.40426000 | -1.27854800 |
| C  | 2.62226900  | -2.11804400 | -2.35490400 |
| C  | 3.59409700  | -3.03833400 | -2.77387500 |
| C  | 3.68101600  | -4.25760900 | -2.09950700 |
| C  | 2.84716300  | -4.57203700 | -1.01471600 |
| C  | 1.90341400  | -3.63115100 | -0.60425200 |
| H  | 2.55585000  | -1.15673000 | -2.84938000 |
| H  | 4.43729700  | -4.97637700 | -2.40785400 |
| H  | 1.27181000  | -3.83908300 | 0.25440800  |
| C  | -4.40923900 | -0.19476300 | 0.55408600  |
| O  | -3.68202000 | -0.64441400 | 1.44732500  |
| H  | -4.99673800 | 1.34989900  | -0.58941400 |
| H  | -2.10417900 | 2.91921400  | -0.51834400 |
| C  | -2.18448900 | 0.55891700  | -1.54898000 |
| O  | -2.76373400 | 1.36968900  | -2.26033800 |
| C  | -1.16064300 | 2.65235500  | 1.38472000  |
| C  | -0.60421900 | 3.93142500  | 1.34094600  |
| C  | -0.86074200 | 1.80647100  | 2.46021500  |
| C  | 0.25899300  | 4.35921900  | 2.34917000  |
| H  | -0.84181300 | 4.58960100  | 0.50934300  |
| C  | 0.00821800  | 2.23065900  | 3.46174100  |
| H  | -1.29334100 | 0.81035100  | 2.51654800  |
| C  | 0.57135600  | 3.50692000  | 3.40755400  |
| H  | 0.69742000  | 5.35155600  | 2.29922500  |
| H  | 0.25111900  | 1.55967900  | 4.27911000  |
| H  | 1.25844000  | 3.83102000  | 4.18349300  |
| C  | -4.20608600 | 3.43852100  | 0.83170800  |
| C  | -4.44512400 | 4.13943600  | 2.01525100  |
| C  | -4.53238800 | 4.02969200  | -0.39662800 |

|   |             |             |             |
|---|-------------|-------------|-------------|
| C | -5.01511700 | 5.41307100  | 1.97715600  |
| H | -4.17567100 | 3.68937800  | 2.96656900  |
| C | -5.11010900 | 5.29756300  | -0.43437900 |
| H | -4.31919800 | 3.49935000  | -1.32250400 |
| C | -5.35244000 | 5.99193600  | 0.75344800  |
| H | -5.19487000 | 5.95138900  | 2.90325700  |
| H | -5.36467800 | 5.74625900  | -1.39025300 |
| H | -5.79780100 | 6.98218000  | 0.72368000  |
| C | -5.47869300 | -0.96866500 | -0.27788100 |
| O | -6.05623000 | -0.31068800 | -1.15450200 |
| N | -5.78151300 | -2.25698900 | -0.00163000 |
| C | -5.02101100 | -3.12429000 | 0.93024600  |
| C | -6.97239300 | -2.85915500 | -0.66160500 |
| H | -7.05732900 | -3.85169400 | -0.21421100 |
| C | -6.77591600 | -3.04841300 | -2.16900400 |
| C | 2.17769600  | -0.68680800 | 4.22312800  |
| H | 1.74390800  | -0.41310100 | 5.19127300  |
| H | 2.92450500  | -1.46791500 | 4.40249500  |
| H | 2.70683800  | 0.17571100  | 3.81040000  |
| C | -2.33379700 | -2.83015300 | 3.44098700  |
| H | -2.22118700 | -3.09956900 | 4.49571200  |
| H | -3.16670100 | -2.12532000 | 3.35011600  |
| H | -2.61058100 | -3.73586600 | 2.88877200  |
| C | 3.00203200  | -5.88695900 | -0.28928400 |
| H | 3.99010100  | -5.96244500 | 0.18137800  |
| H | 2.24799200  | -6.00006800 | 0.49594900  |
| H | 2.90649600  | -6.73669600 | -0.97566700 |
| C | 4.56181300  | -2.66879100 | -3.86662400 |
| H | 5.25307600  | -1.90892600 | -3.48535800 |
| H | 5.13879300  | -3.53553100 | -4.20334900 |
| H | 4.04327700  | -2.24362300 | -4.73378100 |
| H | -4.16368400 | -2.53992200 | 1.24149300  |
| H | -5.88379900 | -3.64875700 | -2.36800000 |
| H | -7.64193900 | -3.57332200 | -2.58758200 |
| H | -6.67429500 | -2.08392600 | -2.66882100 |
| C | -8.25938500 | -2.09930700 | -0.32033000 |
| H | -8.25616500 | -1.10157900 | -0.76097000 |
| H | -9.12088100 | -2.65261400 | -0.71009200 |
| H | -8.37553500 | -2.00657300 | 0.76467700  |
| C | -4.49842900 | -4.38032100 | 0.22469300  |
| H | -3.89835500 | -4.11038000 | -0.64868600 |
| H | -3.85981500 | -4.93888200 | 0.91809200  |
| H | -5.29933400 | -5.05535600 | -0.09665800 |
| C | -5.84586400 | -3.44140400 | 2.18098700  |

|   |             |             |             |
|---|-------------|-------------|-------------|
| H | -6.14359900 | -2.51567300 | 2.68337000  |
| H | -6.74956700 | -4.01672000 | 1.95002500  |
| H | -5.24609200 | -4.03237400 | 2.88103200  |
| C | 4.91809300  | 3.50839300  | -0.78612900 |
| C | 4.01389700  | 2.49503000  | -1.15920700 |
| C | 3.04415900  | 2.77938000  | -2.14548300 |
| C | 3.00516000  | 4.06326200  | -2.72796600 |
| C | 3.90862900  | 5.04877900  | -2.35555200 |
| C | 4.86850000  | 4.76423000  | -1.37845700 |
| H | 5.64927600  | 3.28726000  | -0.02063600 |
| H | 2.28186500  | 4.26536100  | -3.51096300 |
| H | 3.87548900  | 6.02490100  | -2.83085200 |
| H | 5.57753800  | 5.52864900  | -1.07187400 |
| C | 2.14493200  | 1.72901300  | -2.65174600 |
| H | 2.63651900  | 0.81338800  | -2.96345900 |
| O | 1.85714500  | 2.07946800  | 0.68239300  |
| C | 2.91908800  | 1.73251500  | 1.13169800  |
| O | 3.59643400  | 1.58428600  | 2.10655200  |
| N | 3.93573600  | 1.25415500  | -0.47781900 |
| S | 5.35874600  | 0.38815000  | -0.46429000 |
| C | 5.16161500  | -0.74644000 | 0.90663000  |
| C | 5.71003900  | -0.41906900 | 2.14653300  |
| C | 4.55416100  | -1.98011900 | 0.69836000  |
| C | 5.62300600  | -1.33592700 | 3.18939600  |
| H | 6.19310300  | 0.54037300  | 2.27982100  |
| C | 4.45749900  | -2.88163500 | 1.75689800  |
| H | 4.18144100  | -2.22942300 | -0.28269300 |
| C | 4.99226800  | -2.57605600 | 3.01352300  |
| H | 6.04409300  | -1.08435100 | 4.15960400  |
| H | 3.96640800  | -3.83759500 | 1.59978700  |
| O | 5.39915800  | -0.42833100 | -1.69918000 |
| O | 6.55957900  | 1.19503300  | -0.15988900 |
| C | 4.91690700  | -3.57343200 | 4.14414700  |
| H | 4.94552800  | -3.07700600 | 5.11981100  |
| H | 5.76125600  | -4.27465600 | 4.11067700  |
| H | 3.99813800  | -4.16765200 | 4.09074700  |
| C | 0.85216100  | 2.03703500  | -3.17702700 |
| H | 0.39800100  | 1.41758900  | -3.94614600 |
| C | 0.07124500  | 2.96171600  | -2.45211200 |
| H | 0.53753300  | 3.75303400  | -1.87610300 |
| H | -0.97819300 | 3.07984800  | -2.70418300 |

**M3S**

|   |             |            |            |
|---|-------------|------------|------------|
| C | -3.86199400 | 1.87418100 | 0.45337700 |
|---|-------------|------------|------------|



|    |             |             |             |
|----|-------------|-------------|-------------|
| C  | -2.49790800 | 2.14566700  | -0.29747800 |
| H  | -3.62469500 | 1.80300000  | 1.51745900  |
| N  | -4.49129900 | 0.61141100  | 0.10255800  |
| N  | -1.84862200 | 0.89717800  | -0.72823600 |
| H  | -1.65798100 | 0.27581100  | 0.05812300  |
| C  | -2.17478200 | -1.23981600 | -1.93961800 |
| C  | -0.96471900 | -1.89468200 | -1.59617700 |
| C  | -0.89041300 | -3.28177700 | -1.78682600 |
| C  | -1.96722400 | -4.00744500 | -2.29678000 |
| C  | -3.14864400 | -3.35285900 | -2.64034300 |
| C  | -3.24654800 | -1.97661500 | -2.46173900 |
| P  | 0.55415300  | -0.94261700 | -1.12606600 |
| H  | 0.03748500  | -3.79748400 | -1.57168100 |
| H  | -1.87147100 | -5.08005600 | -2.43963500 |
| H  | -3.98657500 | -3.90430400 | -3.05282600 |
| H  | -4.15755200 | -1.44839200 | -2.71541200 |
| Pd | 0.20484200  | 1.27093700  | -1.75436900 |
| C  | 0.61563500  | -0.91986100 | 0.70270700  |
| C  | -0.25264400 | -1.63450800 | 1.53274000  |
| C  | -0.18563900 | -1.47493000 | 2.92386100  |
| C  | 0.77946200  | -0.61142300 | 3.45499600  |
| C  | 1.66646400  | 0.10609100  | 2.64125800  |
| C  | 1.56382100  | -0.04807800 | 1.25765400  |
| H  | -0.99656400 | -2.29610000 | 1.10040100  |
| H  | 0.83524300  | -0.48469400 | 4.53439400  |
| H  | 2.22446900  | 0.51623200  | 0.60622600  |
| C  | 1.95594700  | -2.00225500 | -1.59626800 |
| C  | 2.74677600  | -1.60594300 | -2.67694300 |
| C  | 3.88339300  | -2.33935100 | -3.03821100 |
| C  | 4.19595700  | -3.48093400 | -2.29402800 |
| C  | 3.42143300  | -3.89824600 | -1.20355800 |
| C  | 2.29492200  | -3.14792600 | -0.86050600 |
| H  | 2.49242600  | -0.70001700 | -3.21876700 |
| H  | 5.09075700  | -4.04349900 | -2.54976400 |
| H  | 1.70684000  | -3.42652500 | 0.01029500  |
| C  | -4.16346500 | -0.53555700 | 0.72520300  |
| O  | -3.22412500 | -0.61155000 | 1.52680700  |
| H  | -5.26707900 | 0.56171500  | -0.54937000 |
| H  | -2.70671000 | 2.69314300  | -1.21376100 |
| C  | -2.44637700 | 0.23195100  | -1.82233700 |
| O  | -3.17942200 | 0.82095200  | -2.60348400 |
| C  | -1.61526000 | 2.96941000  | 0.60817800  |
| C  | -1.54745500 | 4.35418100  | 0.42779500  |
| C  | -0.95141200 | 2.38715500  | 1.69626300  |

|   |             |             |             |
|---|-------------|-------------|-------------|
| C | -0.81457700 | 5.14920100  | 1.31056300  |
| H | -2.08090700 | 4.80973000  | -0.40198600 |
| C | -0.21630000 | 3.18043000  | 2.57469400  |
| H | -1.01255900 | 1.31790400  | 1.87375800  |
| C | -0.14717600 | 4.56187800  | 2.38585300  |
| H | -0.76899400 | 6.22374000  | 1.15855100  |
| H | 0.29970700  | 2.71531900  | 3.40781000  |
| H | 0.42423100  | 5.17664200  | 3.07488300  |
| C | -4.80892500 | 3.02610400  | 0.20964400  |
| C | -5.16386200 | 3.88611300  | 1.25101300  |
| C | -5.31289100 | 3.25734300  | -1.07802200 |
| C | -6.02092000 | 4.96238300  | 1.01529200  |
| H | -4.76275800 | 3.71503300  | 2.24616100  |
| C | -6.17623100 | 4.32670800  | -1.31084500 |
| H | -5.01383100 | 2.60661500  | -1.89692800 |
| C | -6.53169400 | 5.18150600  | -0.26437100 |
| H | -6.28948900 | 5.62712300  | 1.83126500  |
| H | -6.56577200 | 4.49690300  | -2.31034500 |
| H | -7.20059700 | 6.01741200  | -0.44779100 |
| C | -5.13483400 | -1.67421600 | 0.28466700  |
| O | -5.96110600 | -1.36446600 | -0.58496400 |
| N | -5.09596300 | -2.89339300 | 0.86596300  |
| C | -4.05455500 | -3.34897800 | 1.81871700  |
| C | -6.17890800 | -3.86385400 | 0.54263600  |
| H | -5.96883000 | -4.72680100 | 1.17808000  |
| C | -6.12501300 | -4.34315600 | -0.91098700 |
| C | 2.69778200  | 1.03900100  | 3.22022500  |
| H | 2.61111200  | 1.10261000  | 4.31002100  |
| H | 3.70883900  | 0.69955500  | 2.97748300  |
| H | 2.59204000  | 2.04433000  | 2.80031700  |
| C | -1.16672000 | -2.18448500 | 3.82294800  |
| H | -0.83855900 | -2.16857000 | 4.86687500  |
| H | -2.14942200 | -1.70195500 | 3.76684600  |
| H | -1.29865300 | -3.23105100 | 3.52515800  |
| C | 3.84873300  | -5.07511400 | -0.36192900 |
| H | 4.58206800  | -4.75670400 | 0.39016300  |
| H | 3.00051000  | -5.51824000 | 0.17059800  |
| H | 4.31849100  | -5.85554300 | -0.96941100 |
| C | 4.78500000  | -1.86032900 | -4.14374500 |
| H | 5.54308900  | -1.19840300 | -3.70996900 |
| H | 5.29740300  | -2.69432000 | -4.63445100 |
| H | 4.22698900  | -1.30187400 | -4.90276000 |
| H | -3.34711500 | -2.53184800 | 1.89632400  |
| H | -5.14891600 | -4.78218200 | -1.13534800 |

|   |             |             |             |
|---|-------------|-------------|-------------|
| H | -6.89101400 | -5.11040800 | -1.06998300 |
| H | -6.30795400 | -3.51552800 | -1.59770000 |
| C | -7.55928700 | -3.33255300 | 0.94522800  |
| H | -7.84929500 | -2.48146900 | 0.32770300  |
| H | -8.30368400 | -4.12662800 | 0.82063000  |
| H | -7.56178200 | -3.02426800 | 1.99603900  |
| C | -3.30311200 | -4.56932800 | 1.27508000  |
| H | -2.86497800 | -4.34808800 | 0.29770100  |
| H | -2.49141900 | -4.82874700 | 1.96377700  |
| H | -3.94276100 | -5.45318600 | 1.17661400  |
| C | -4.64790100 | -3.58576300 | 3.21125700  |
| H | -5.13033500 | -2.67517200 | 3.58048000  |
| H | -5.38567800 | -4.39561200 | 3.22066300  |
| H | -3.85030800 | -3.85709100 | 3.91053500  |
| C | 4.85939900  | 2.79209100  | 0.77416700  |
| C | 4.24871900  | 2.18256300  | -0.37359200 |
| C | 3.01006000  | 2.79445500  | -0.86190800 |
| C | 2.43921000  | 3.87631700  | -0.13374600 |
| C | 3.03878700  | 4.39555300  | 0.98670100  |
| C | 4.26867000  | 3.84716000  | 1.42479400  |
| H | 5.81531700  | 2.41899500  | 1.11153200  |
| H | 1.51852700  | 4.32197300  | -0.48185300 |
| H | 2.58657400  | 5.22728000  | 1.51561600  |
| H | 4.76215800  | 4.27097100  | 2.29657300  |
| C | 2.49053500  | 2.30715600  | -2.08934800 |
| H | 3.14833200  | 1.57927100  | -2.55745000 |
| N | 4.69856700  | 1.09811500  | -1.02832500 |
| S | 6.09496500  | 0.34214000  | -0.60923700 |
| C | 5.65774500  | -0.52291300 | 0.90469000  |
| C | 6.33986800  | -0.28954200 | 2.09484800  |
| C | 4.59667000  | -1.42669600 | 0.85769400  |
| C | 5.93471200  | -0.95807300 | 3.25387400  |
| H | 7.17102300  | 0.40728900  | 2.10406900  |
| C | 4.20175800  | -2.08344200 | 2.01573100  |
| H | 4.08085200  | -1.58930500 | -0.07691500 |
| C | 4.85712000  | -1.85105600 | 3.23491800  |
| H | 6.45638900  | -0.77205600 | 4.18952500  |
| H | 3.35463200  | -2.76373100 | 1.98178800  |
| O | 6.32465700  | -0.68876000 | -1.63381500 |
| O | 7.21133200  | 1.24993200  | -0.27144500 |
| C | 4.37655000  | -2.53094400 | 4.49299100  |
| H | 4.97592600  | -2.24076500 | 5.36136800  |
| H | 4.42299900  | -3.62322100 | 4.40182600  |
| H | 3.33076000  | -2.26960600 | 4.69937400  |

|   |             |            |             |
|---|-------------|------------|-------------|
| C | 1.37326400  | 2.68872700 | -2.89895300 |
| H | 1.42292300  | 2.33883500 | -3.92908200 |
| C | 0.17440000  | 3.31038900 | -2.49062700 |
| H | 0.10107300  | 3.92613200 | -1.60436700 |
| H | -0.58126600 | 3.50333800 | -3.24845300 |

**TS3S**

|    |             |             |             |
|----|-------------|-------------|-------------|
| C  | -4.01335800 | 2.06334000  | 0.86140400  |
| C  | -2.54325300 | 2.27930400  | 0.31361900  |
| H  | -3.92487500 | 1.76316900  | 1.90745100  |
| N  | -4.72642500 | 0.98678600  | 0.19778500  |
| N  | -2.02578300 | 1.10195800  | -0.38680900 |
| H  | -1.86507000 | 0.30169700  | 0.21997700  |
| C  | -2.37517600 | -0.61087500 | -2.13653700 |
| C  | -1.20808800 | -1.40080500 | -1.98136800 |
| C  | -1.18842800 | -2.68049200 | -2.55363200 |
| C  | -2.28622700 | -3.17892600 | -3.25494300 |
| C  | -3.43038200 | -2.39578900 | -3.40378600 |
| C  | -3.46866500 | -1.11890800 | -2.85025500 |
| P  | 0.30494300  | -0.66267800 | -1.22944400 |
| H  | -0.28932300 | -3.28067900 | -2.47838200 |
| H  | -2.23910200 | -4.17159000 | -3.69401000 |
| H  | -4.28540600 | -2.76815800 | -3.95804800 |
| H  | -4.34743800 | -0.49466800 | -2.96066300 |
| Pd | 0.28579600  | 1.65159600  | -1.23168400 |
| C  | 0.22579600  | -1.11927500 | 0.55151100  |
| C  | -0.75622500 | -1.93405900 | 1.12270200  |
| C  | -0.78184200 | -2.14967200 | 2.50931600  |
| C  | 0.20852800  | -1.55878100 | 3.30073900  |
| C  | 1.21038500  | -0.74810800 | 2.74986400  |
| C  | 1.19563600  | -0.52673000 | 1.37370100  |
| H  | -1.51199700 | -2.39660300 | 0.49447300  |
| H  | 0.19525100  | -1.72668800 | 4.37594200  |
| H  | 1.95187100  | 0.11648400  | 0.93437900  |
| C  | 1.74191300  | -1.64683000 | -1.79499900 |
| C  | 2.71632400  | -0.96949500 | -2.53807400 |
| C  | 3.93416100  | -1.57991100 | -2.86041700 |
| C  | 4.13714500  | -2.90376700 | -2.45475900 |
| C  | 3.17328100  | -3.61296900 | -1.72651400 |
| C  | 1.97969600  | -2.96746700 | -1.38923900 |
| H  | 2.52902400  | 0.05803400  | -2.83488100 |
| H  | 5.08884100  | -3.38126800 | -2.67607400 |
| H  | 1.24918300  | -3.48542500 | -0.77287100 |
| C  | -4.59083600 | -0.29593000 | 0.57483300  |

|   |             |             |             |
|---|-------------|-------------|-------------|
| O | -3.80928400 | -0.66136000 | 1.46180000  |
| H | -5.39527500 | 1.16720400  | -0.54318600 |
| H | -2.56704600 | 3.07462300  | -0.42861900 |
| C | -2.56006500 | 0.79869500  | -1.63684800 |
| O | -3.18827400 | 1.62544000  | -2.28895800 |
| C | -1.63159900 | 2.66805800  | 1.45309900  |
| C | -1.08777000 | 3.95322000  | 1.51287700  |
| C | -1.35540300 | 1.75806600  | 2.48192800  |
| C | -0.26298700 | 4.32462200  | 2.57556800  |
| H | -1.30821600 | 4.66053900  | 0.71868700  |
| C | -0.53233800 | 2.12831200  | 3.54330200  |
| H | -1.78648700 | 0.76070000  | 2.45845200  |
| C | 0.01900500  | 3.41074500  | 3.59229800  |
| H | 0.15587400  | 5.32639800  | 2.60970600  |
| H | -0.32433000 | 1.41177300  | 4.33163500  |
| H | 0.65868000  | 3.69822800  | 4.42208300  |
| C | -4.79127500 | 3.35527300  | 0.76487500  |
| C | -5.20029300 | 4.02542000  | 1.91995500  |
| C | -5.08643500 | 3.90434900  | -0.49126900 |
| C | -5.90363100 | 5.22777600  | 1.82737700  |
| H | -4.96298300 | 3.60587200  | 2.89396900  |
| C | -5.79772100 | 5.09956600  | -0.58282900 |
| H | -4.74192100 | 3.39935300  | -1.39086700 |
| C | -6.20748800 | 5.76416500  | 0.57589100  |
| H | -6.21484700 | 5.74221400  | 2.73213000  |
| H | -6.02588400 | 5.51635000  | -1.55969400 |
| H | -6.75731700 | 6.69818500  | 0.50239700  |
| C | -5.57899800 | -1.19084300 | -0.23649600 |
| O | -6.31254200 | -0.59624900 | -1.03802300 |
| N | -5.66007900 | -2.52139500 | -0.00973200 |
| C | -4.69166400 | -3.30194300 | 0.79645900  |
| C | -6.80014400 | -3.27003600 | -0.60539700 |
| H | -6.70452400 | -4.27928900 | -0.19901100 |
| C | -6.70283400 | -3.37618400 | -2.13036500 |
| C | 2.26493900  | -0.09604400 | 3.60730000  |
| H | 3.25611400  | -0.19760800 | 3.15623500  |
| H | 2.06026600  | 0.97592100  | 3.71634100  |
| H | 2.29873000  | -0.53829400 | 4.60792700  |
| C | -1.87961000 | -2.97277800 | 3.13471700  |
| H | -1.63852600 | -3.24434600 | 4.16726500  |
| H | -2.81887000 | -2.40859800 | 3.13910300  |
| H | -2.05533100 | -3.89803000 | 2.57368700  |
| C | 3.46256900  | -5.00827100 | -1.23027800 |
| H | 4.07511200  | -4.96951500 | -0.32020700 |

|   |             |             |             |
|---|-------------|-------------|-------------|
| H | 2.54081100  | -5.54681900 | -0.98668600 |
| H | 4.01520300  | -5.59298000 | -1.97302000 |
| C | 5.02739600  | -0.81356000 | -3.56045300 |
| H | 4.68176200  | 0.17881300  | -3.86643000 |
| H | 5.88054700  | -0.68928800 | -2.88382900 |
| H | 5.38071500  | -1.34314600 | -4.45299500 |
| H | -3.90213900 | -2.60854000 | 1.06121900  |
| H | -5.75359000 | -3.83218100 | -2.42437100 |
| H | -7.51726600 | -4.00604600 | -2.50582400 |
| H | -6.77949500 | -2.39017800 | -2.59112600 |
| C | -8.15102300 | -2.72144200 | -0.13194000 |
| H | -8.32965500 | -1.72059800 | -0.52697600 |
| H | -8.95242500 | -3.38392100 | -0.47719400 |
| H | -8.18757400 | -2.68138500 | 0.96189800  |
| C | -4.06437900 | -4.43521100 | -0.02347600 |
| H | -3.59968000 | -4.04448500 | -0.93315500 |
| H | -3.28608000 | -4.91938900 | 0.57693300  |
| H | -4.78685900 | -5.20888400 | -0.30459300 |
| C | -5.33640500 | -3.79122000 | 2.09686300  |
| H | -5.68841400 | -2.93882300 | 2.68608300  |
| H | -6.18456000 | -4.46052800 | 1.91315500  |
| H | -4.60309400 | -4.34197400 | 2.69482300  |
| C | 6.90706200  | 2.55869800  | -0.69667100 |
| C | 5.59194200  | 1.95792500  | -0.58783500 |
| C | 4.45127000  | 2.73865400  | -1.14764500 |
| C | 4.70532900  | 4.04016700  | -1.72853300 |
| C | 5.96141200  | 4.54583000  | -1.79398500 |
| C | 7.06589300  | 3.78223600  | -1.27105200 |
| H | 7.75505100  | 2.02409100  | -0.28932100 |
| H | 3.85193800  | 4.59598700  | -2.10312700 |
| H | 6.14914700  | 5.52179600  | -2.23034200 |
| H | 8.06450300  | 4.20776700  | -1.33173000 |
| C | 3.20760500  | 2.17924900  | -1.14768700 |
| H | 3.14431200  | 1.19704700  | -0.69203400 |
| N | 5.30959500  | 0.78840500  | -0.06218400 |
| S | 6.48908800  | -0.28256300 | 0.42879200  |
| C | 5.49044200  | -1.33702900 | 1.46767700  |
| C | 5.91548500  | -1.61026300 | 2.76503800  |
| C | 4.33447300  | -1.92230900 | 0.94767700  |
| C | 5.15961700  | -2.47864300 | 3.55521200  |
| H | 6.81536200  | -1.13773100 | 3.14236200  |
| C | 3.59666000  | -2.78585500 | 1.74753000  |
| H | 4.01076800  | -1.68539100 | -0.05601600 |
| C | 3.99337500  | -3.07413200 | 3.06223000  |

|   |            |             |             |
|---|------------|-------------|-------------|
| H | 5.47695600 | -2.68740700 | 4.57356500  |
| H | 2.68040700 | -3.21661100 | 1.35653200  |
| O | 6.91818500 | -1.05616300 | -0.75254400 |
| O | 7.52876600 | 0.32405900  | 1.28188400  |
| C | 3.15244100 | -3.98635600 | 3.91914100  |
| H | 2.10886500 | -3.65020500 | 3.92962400  |
| H | 3.51484000 | -4.01602500 | 4.95121700  |
| H | 3.15800200 | -5.01322400 | 3.53237800  |
| C | 1.98920300 | 2.73290800  | -1.78960500 |
| H | 2.04812200 | 2.75182500  | -2.88201400 |
| C | 1.08891700 | 3.64523600  | -1.18373600 |
| H | 1.23404500 | 3.95985800  | -0.15337600 |
| H | 0.52305600 | 4.32876300  | -1.81369100 |

#### M4S

|    |             |             |             |
|----|-------------|-------------|-------------|
| C  | -4.09920200 | 1.81420400  | 0.64427300  |
| C  | -2.60894800 | 2.20453900  | 0.27374600  |
| H  | -4.08907800 | 1.51056400  | 1.69343100  |
| N  | -4.61384600 | 0.67218600  | -0.09263800 |
| N  | -1.87955100 | 1.09412700  | -0.35753900 |
| H  | -1.77067600 | 0.29092800  | 0.25979800  |
| C  | -1.98993200 | -0.64636100 | -2.12274300 |
| C  | -0.82422400 | -1.39847800 | -1.83180600 |
| C  | -0.71901400 | -2.69020700 | -2.36694600 |
| C  | -1.72813600 | -3.23239200 | -3.16328400 |
| C  | -2.86682700 | -2.48211200 | -3.45143700 |
| C  | -2.99081700 | -1.19598600 | -2.93470500 |
| P  | 0.61640300  | -0.61791900 | -0.97825600 |
| H  | 0.18131100  | -3.26641800 | -2.18917800 |
| H  | -1.61203800 | -4.23335300 | -3.56922800 |
| H  | -3.65067400 | -2.88706400 | -4.08226000 |
| H  | -3.86935200 | -0.59917700 | -3.14678100 |
| Pd | 0.37327600  | 1.70590400  | -0.95192300 |
| C  | 0.40520800  | -0.96743900 | 0.81211400  |
| C  | -0.56606900 | -1.81658900 | 1.34859000  |
| C  | -0.69264000 | -1.95662300 | 2.73946700  |
| C  | 0.17821000  | -1.24119800 | 3.56834200  |
| C  | 1.16294600  | -0.38784200 | 3.05102800  |
| C  | 1.26341300  | -0.25792100 | 1.66631700  |
| H  | -1.23329100 | -2.36464100 | 0.69014000  |
| H  | 0.08342600  | -1.34597300 | 4.64750500  |
| H  | 2.02853300  | 0.38885000  | 1.24501800  |
| C  | 2.06159800  | -1.64178100 | -1.40667800 |
| C  | 3.04310300  | -1.10172600 | -2.24374100 |

|   |             |             |             |
|---|-------------|-------------|-------------|
| C | 4.20815900  | -1.82610400 | -2.52909100 |
| C | 4.35811200  | -3.09530500 | -1.95985300 |
| C | 3.39292900  | -3.65387700 | -1.11335900 |
| C | 2.24008700  | -2.91419800 | -0.84247000 |
| H | 2.91890600  | -0.09914700 | -2.64200500 |
| H | 5.27118700  | -3.65258300 | -2.15726900 |
| H | 1.49621300  | -3.31266900 | -0.15755500 |
| C | -4.38568600 | -0.58703700 | 0.32249600  |
| O | -3.62159100 | -0.85012500 | 1.25906200  |
| H | -5.26925700 | 0.78108300  | -0.85918900 |
| H | -2.63624400 | 2.99494400  | -0.47309900 |
| C | -2.27430200 | 0.75632800  | -1.66424200 |
| O | -2.86500800 | 1.55603900  | -2.37825300 |
| C | -1.92348900 | 2.69893500  | 1.52359600  |
| C | -1.75968000 | 4.07150500  | 1.72940200  |
| C | -1.53793700 | 1.80527600  | 2.53083300  |
| C | -1.18971800 | 4.54895700  | 2.91031900  |
| H | -2.07899300 | 4.76740900  | 0.95875100  |
| C | -0.97286600 | 2.28172100  | 3.71200800  |
| H | -1.69046700 | 0.73764000  | 2.40664200  |
| C | -0.79107600 | 3.65326300  | 3.90370500  |
| H | -1.06106700 | 5.61784700  | 3.05404800  |
| H | -0.68084700 | 1.57626200  | 4.48304900  |
| H | -0.34945900 | 4.02171600  | 4.82517900  |
| C | -4.99984900 | 3.01397500  | 0.46533300  |
| C | -5.58893200 | 3.62886300  | 1.57238000  |
| C | -5.22747600 | 3.53612600  | -0.81597800 |
| C | -6.40523600 | 4.74896900  | 1.40586400  |
| H | -5.40318500 | 3.23177400  | 2.56661300  |
| C | -6.05106100 | 4.64839000  | -0.98215900 |
| H | -4.74363400 | 3.07743400  | -1.67524800 |
| C | -6.64124300 | 5.25731400  | 0.12829200  |
| H | -6.85693200 | 5.22143300  | 2.27340700  |
| H | -6.22616400 | 5.04452400  | -1.97829300 |
| H | -7.27863600 | 6.12710100  | -0.00249900 |
| C | -5.23365400 | -1.58919800 | -0.51940100 |
| O | -5.94504300 | -1.08369300 | -1.39862100 |
| N | -5.22535400 | -2.91241500 | -0.24405500 |
| C | -4.28440000 | -3.57918600 | 0.68843100  |
| C | -6.23304600 | -3.77975900 | -0.91466000 |
| H | -6.08280200 | -4.76500000 | -0.46812000 |
| C | -5.98496600 | -3.91527000 | -2.41986400 |
| C | 2.07202200  | 0.41040100  | 3.94920200  |
| H | 3.06723100  | 0.50987300  | 3.51004200  |



|   |             |             |             |
|---|-------------|-------------|-------------|
| H | 1.67114900  | 1.42120900  | 4.09684200  |
| H | 2.17835700  | -0.05687600 | 4.93311000  |
| C | -1.77280800 | -2.83252300 | 3.32294100  |
| H | -1.61134300 | -3.01025200 | 4.39064300  |
| H | -2.75325900 | -2.35958300 | 3.19784200  |
| H | -1.81267700 | -3.80618700 | 2.82049900  |
| C | 3.63349400  | -4.98411400 | -0.44309000 |
| H | 4.26770300  | -4.85500800 | 0.44345900  |
| H | 2.69547100  | -5.44417600 | -0.11498100 |
| H | 4.14413300  | -5.68542600 | -1.11135100 |
| C | 5.30896800  | -1.23715300 | -3.36985700 |
| H | 4.96794600  | -0.35621900 | -3.91952300 |
| H | 6.13334900  | -0.92748500 | -2.71861400 |
| H | 5.69602200  | -1.97050900 | -4.08669600 |
| H | -3.60175000 | -2.80649500 | 1.02104100  |
| H | -4.97525400 | -4.28892900 | -2.61170400 |
| H | -6.70124300 | -4.62743300 | -2.84476000 |
| H | -6.10730900 | -2.95282000 | -2.91882900 |
| C | -7.66610300 | -3.34800300 | -0.58342000 |
| H | -7.89688800 | -2.37836800 | -1.02640200 |
| H | -8.36866300 | -4.09050000 | -0.97750800 |
| H | -7.80813300 | -3.28442900 | 0.50058100  |
| C | -3.46032500 | -4.65525400 | -0.02698800 |
| H | -2.93157700 | -4.22854800 | -0.88411000 |
| H | -2.71579400 | -5.05709300 | 0.66942800  |
| H | -4.06776500 | -5.49715400 | -0.37678000 |
| C | -5.02108000 | -4.10974700 | 1.92215000  |
| H | -5.53593500 | -3.29214300 | 2.43643800  |
| H | -5.75887700 | -4.87885100 | 1.66808300  |
| H | -4.30459100 | -4.55564500 | 2.61966000  |
| C | 6.22552000  | 1.84342800  | -2.14716500 |
| C | 5.01336300  | 1.80633200  | -1.36669400 |
| C | 3.85112000  | 2.47042100  | -1.95168800 |
| C | 3.89520500  | 2.87005600  | -3.32340300 |
| C | 5.04295100  | 2.77936900  | -4.06443500 |
| C | 6.22623400  | 2.29795100  | -3.43907000 |
| H | 7.13692800  | 1.45056700  | -1.71798200 |
| H | 3.00396200  | 3.29382300  | -3.77456500 |
| H | 5.06435300  | 3.10727300  | -5.09886100 |
| H | 7.15500600  | 2.27691000  | -4.00389500 |
| C | 2.75865100  | 2.79308200  | -1.12307500 |
| H | 2.90426200  | 2.61438800  | -0.06009200 |
| N | 4.85826200  | 1.21633100  | -0.17506600 |
| S | 6.15646500  | 0.47919800  | 0.53774100  |

|   |             |             |             |
|---|-------------|-------------|-------------|
| C | 5.32869200  | -0.51532700 | 1.77271700  |
| C | 5.73009600  | -0.43608400 | 3.10263100  |
| C | 4.37993300  | -1.45157100 | 1.36364000  |
| C | 5.15429500  | -1.30075400 | 4.03716700  |
| H | 6.47859400  | 0.29486800  | 3.38832100  |
| C | 3.80914800  | -2.29757400 | 2.30560400  |
| H | 4.08753900  | -1.49615000 | 0.32476100  |
| C | 4.18363700  | -2.23348100 | 3.65646800  |
| H | 5.45491700  | -1.23887700 | 5.08011600  |
| H | 3.04369600  | -3.00284600 | 1.99340600  |
| O | 6.81642700  | -0.48178700 | -0.37775500 |
| O | 7.01839400  | 1.44364600  | 1.24861300  |
| C | 3.51758300  | -3.13316100 | 4.66749100  |
| H | 2.43363400  | -2.96201200 | 4.68199800  |
| H | 3.90295800  | -2.95905200 | 5.67685800  |
| H | 3.67256200  | -4.19201700 | 4.42632200  |
| C | 1.56746100  | 3.46217100  | -1.52578100 |
| H | 1.43338700  | 3.70485800  | -2.57622900 |
| C | 0.54312100  | 3.82030900  | -0.63073300 |
| H | 0.73517800  | 3.87988500  | 0.43886100  |
| H | -0.28333000 | 4.42644100  | -0.99147200 |

## M5

|    |             |             |             |
|----|-------------|-------------|-------------|
| C  | -2.95422800 | 2.71816000  | 0.25995500  |
| C  | -1.42118500 | 2.29632600  | 0.37593100  |
| H  | -3.36550700 | 2.70706600  | 1.27182100  |
| N  | -3.73058200 | 1.75251700  | -0.49694700 |
| N  | -1.19704800 | 0.92361400  | -0.04326300 |
| H  | -1.54530400 | 0.18894800  | 0.55718100  |
| C  | -1.19897300 | -0.75691100 | -1.84830300 |
| C  | -0.51166800 | -1.87053500 | -1.32434800 |
| C  | -0.71698700 | -3.12669000 | -1.91971300 |
| C  | -1.55931800 | -3.28717300 | -3.01540900 |
| C  | -2.22920600 | -2.18071600 | -3.53734700 |
| C  | -2.04559000 | -0.93317100 | -2.95456300 |
| P  | 0.65780300  | -1.79775000 | 0.10214800  |
| H  | -0.18986100 | -3.99101800 | -1.53342200 |
| H  | -1.68868000 | -4.27128900 | -3.45692700 |
| H  | -2.88894400 | -2.28625600 | -4.39267300 |
| H  | -2.55347100 | -0.06195100 | -3.35020500 |
| Pd | 1.77123300  | 0.12641000  | 0.76781700  |
| C  | -0.36884300 | -2.60116300 | 1.40393800  |
| C  | -0.58155900 | -3.98692600 | 1.44341800  |
| C  | -1.45431600 | -4.54848000 | 2.37610100  |

|   |             |             |             |
|---|-------------|-------------|-------------|
| C | -2.13872100 | -3.69568200 | 3.25608100  |
| C | -1.94900900 | -2.31290400 | 3.23754800  |
| C | -1.03255500 | -1.78082600 | 2.31806900  |
| H | -0.05287700 | -4.63610600 | 0.75270500  |
| H | -2.83312500 | -4.12506200 | 3.97557400  |
| H | -0.82368000 | -0.71643100 | 2.32616000  |
| C | 1.95563600  | -3.03715800 | -0.26213700 |
| C | 2.41179200  | -3.27246800 | -1.56139700 |
| C | 3.54856000  | -4.06197600 | -1.78491700 |
| C | 4.21020400  | -4.61660800 | -0.68770700 |
| C | 3.76864300  | -4.39880200 | 0.62582500  |
| C | 2.64281700  | -3.59988700 | 0.82616200  |
| H | 1.92573700  | -2.79063800 | -2.40066500 |
| H | 5.09610400  | -5.22620700 | -0.85448200 |
| H | 2.29864100  | -3.40845700 | 1.83897500  |
| C | -4.08590300 | 0.57440100  | 0.03991200  |
| O | -3.81720000 | 0.24732200  | 1.20456500  |
| H | -4.01822700 | 1.92668100  | -1.45328500 |
| H | -0.85360400 | 2.89894800  | -0.32944100 |
| C | -1.12638100 | 0.67515700  | -1.38665300 |
| O | -1.10148600 | 1.57823000  | -2.21967100 |
| C | -0.93900500 | 2.59645200  | 1.77502900  |
| C | -0.10385500 | 3.69449300  | 1.99545700  |
| C | -1.39442100 | 1.85580700  | 2.87515200  |
| C | 0.29400700  | 4.03386100  | 3.29049500  |
| H | 0.24376700  | 4.28098200  | 1.15231600  |
| C | -0.98304500 | 2.18208000  | 4.16670600  |
| H | -2.10522900 | 1.05234700  | 2.71526000  |
| C | -0.13488600 | 3.27385000  | 4.37894100  |
| H | 0.95214800  | 4.88455200  | 3.43880700  |
| H | -1.34139500 | 1.59889700  | 5.01086700  |
| H | 0.17924900  | 3.53336600  | 5.38608700  |
| C | -3.08989600 | 4.10640800  | -0.31973000 |
| C | -3.66982200 | 5.12933600  | 0.43536500  |
| C | -2.61305500 | 4.38768300  | -1.60838500 |
| C | -3.78047800 | 6.41917700  | -0.08660900 |
| H | -4.03192800 | 4.91447800  | 1.43755300  |
| C | -2.73242600 | 5.67443400  | -2.13136800 |
| H | -2.13103400 | 3.60000300  | -2.18148900 |
| C | -3.31504200 | 6.69286000  | -1.37301700 |
| H | -4.23021600 | 7.20716300  | 0.51107200  |
| H | -2.36118700 | 5.88346800  | -3.13074800 |
| H | -3.40117300 | 7.69593500  | -1.78157100 |
| C | -4.90100700 | -0.27141700 | -0.97274800 |

|   |             |             |             |
|---|-------------|-------------|-------------|
| O | -5.28597600 | 0.31440900  | -1.99266100 |
| N | -5.21442800 | -1.55436800 | -0.67721700 |
| C | -4.54306400 | -2.36368100 | 0.37217100  |
| C | -6.27182600 | -2.22163700 | -1.48095100 |
| H | -6.43773100 | -3.17682700 | -0.97764700 |
| C | -5.82249700 | -2.51680500 | -2.91616500 |
| C | -2.72314100 | -1.40091300 | 4.15590300  |
| H | -3.42197900 | -0.78640200 | 3.57663000  |
| H | -3.29809300 | -1.96992400 | 4.89275000  |
| H | -2.05556500 | -0.72069200 | 4.69685400  |
| C | -1.69319600 | -6.03866400 | 2.41609100  |
| H | -1.66182800 | -6.42160900 | 3.44225400  |
| H | -2.68019800 | -6.29053600 | 2.00688100  |
| H | -0.94433500 | -6.57820200 | 1.82847700  |
| C | 4.48894100  | -5.02907900 | 1.79365600  |
| H | 4.22835800  | -6.09063700 | 1.89544100  |
| H | 5.57606200  | -4.97445900 | 1.66862700  |
| H | 4.22997400  | -4.53505200 | 2.73557900  |
| C | 4.06759700  | -4.24497700 | -3.18971900 |
| H | 4.85701600  | -5.00174000 | -3.23169300 |
| H | 3.26744000  | -4.54487800 | -3.87547600 |
| H | 4.48057600  | -3.30299700 | -3.57177600 |
| H | -3.68483100 | -1.78825400 | 0.70216700  |
| H | -4.89897300 | -3.10151500 | -2.92104400 |
| H | -6.59891900 | -3.09184200 | -3.43384900 |
| H | -5.64979100 | -1.58643300 | -3.45960300 |
| C | -7.59625200 | -1.45169500 | -1.42340800 |
| H | -7.51568300 | -0.48974500 | -1.93182600 |
| H | -8.38029100 | -2.04136300 | -1.91134600 |
| H | -7.89438600 | -1.27825400 | -0.38384600 |
| C | -4.01177600 | -3.68622300 | -0.18968300 |
| H | -3.36591100 | -3.51070800 | -1.05255500 |
| H | -3.41151600 | -4.17108800 | 0.58452700  |
| H | -4.80846900 | -4.37976900 | -0.47983700 |
| C | -5.45998800 | -2.56210300 | 1.58055500  |
| H | -5.74419200 | -1.59152400 | 1.99547600  |
| H | -6.36923300 | -3.11506100 | 1.31583800  |
| H | -4.93295600 | -3.13015900 | 2.35468100  |
| C | 1.83648300  | 3.91619200  | -1.16929000 |
| C | 2.15985200  | 2.76237400  | -0.44282600 |
| C | 2.83269700  | 2.88369400  | 0.79406100  |
| C | 3.18818500  | 4.14361800  | 1.27559100  |
| C | 2.86838400  | 5.29109600  | 0.54531900  |
| C | 2.19250200  | 5.17126200  | -0.67281100 |

|   |            |             |             |
|---|------------|-------------|-------------|
| H | 1.30568600 | 3.80499900  | -2.10688900 |
| H | 3.70403200 | 4.22503000  | 2.22897900  |
| H | 3.13479700 | 6.27147800  | 0.92972500  |
| H | 1.92958800 | 6.06219500  | -1.23641800 |
| C | 3.12275200 | 1.60499300  | 1.51468800  |
| H | 4.07756300 | 1.12376800  | 1.29042900  |
| N | 1.78649500 | 1.45745800  | -0.88455100 |
| S | 2.55003900 | 0.90395300  | -2.23266600 |
| C | 4.23731400 | 0.64842300  | -1.65968600 |
| C | 5.09454300 | 1.74647400  | -1.57540400 |
| C | 4.61077900 | -0.58473400 | -1.12408200 |
| C | 6.32646000 | 1.60292000  | -0.93701000 |
| H | 4.79130400 | 2.69809800  | -1.99721600 |
| C | 5.84757800 | -0.71568800 | -0.49778200 |
| H | 3.93532500 | -1.42653300 | -1.18946700 |
| C | 6.72119400 | 0.37586900  | -0.38657100 |
| H | 6.99206200 | 2.45953000  | -0.86298300 |
| H | 6.13408200 | -1.68095200 | -0.08665000 |
| O | 1.98108600 | -0.42211600 | -2.53686700 |
| O | 2.60998600 | 1.92843500  | -3.28668100 |
| C | 8.06814700 | 0.22330300  | 0.27693400  |
| H | 8.40198500 | 1.16420100  | 0.72665600  |
| H | 8.83405400 | -0.08050100 | -0.44908700 |
| H | 8.04326400 | -0.54023500 | 1.06166500  |
| C | 2.35464000 | 1.11047100  | 2.59454300  |
| H | 1.55386500 | 1.71886900  | 3.00344400  |
| C | 2.35897200 | -0.29335700 | 2.82807200  |
| H | 3.27379600 | -0.86777500 | 2.68979400  |
| H | 1.64375800 | -0.71133500 | 3.53051600  |

## M6

|   |             |             |             |
|---|-------------|-------------|-------------|
| C | -2.98102700 | -0.12177700 | 2.47728100  |
| C | -1.56911900 | 0.32707100  | 1.91847700  |
| H | -2.81832100 | -0.94015900 | 3.18094600  |
| N | -3.83446600 | -0.65379500 | 1.43537900  |
| N | -1.18980000 | -0.38735600 | 0.71671300  |
| H | -0.78855100 | -1.30869800 | 0.82338900  |
| C | -1.23083800 | -0.79837000 | -1.68250600 |
| C | 0.05496500  | -1.35306900 | -1.87590400 |
| C | 0.29965800  | -2.07438700 | -3.05492100 |
| C | -0.67885100 | -2.21931500 | -4.03495900 |
| C | -1.93485200 | -1.64173400 | -3.85367600 |
| C | -2.20567700 | -0.94882500 | -2.67837200 |
| P | 1.47404500  | -1.08675000 | -0.72596400 |

|    |             |             |             |
|----|-------------|-------------|-------------|
| H  | 1.28073100  | -2.50214900 | -3.22350100 |
| H  | -0.45281200 | -2.77318900 | -4.94154500 |
| H  | -2.69933500 | -1.73311700 | -4.61917400 |
| H  | -3.17776700 | -0.50119200 | -2.50249200 |
| Pd | 1.86992500  | 1.04895500  | 0.31144900  |
| C  | 1.33767100  | -2.47622200 | 0.47724600  |
| C  | 0.30036800  | -3.41650000 | 0.44726100  |
| C  | 0.21611200  | -4.42242400 | 1.42285500  |
| C  | 1.21198900  | -4.49569400 | 2.40103700  |
| C  | 2.27475900  | -3.58645400 | 2.43632500  |
| C  | 2.30884900  | -2.57201700 | 1.48116200  |
| H  | -0.45145200 | -3.37246200 | -0.33509700 |
| H  | 1.15850000  | -5.28067000 | 3.15206800  |
| H  | 3.11998800  | -1.85532700 | 1.51034400  |
| C  | 2.96637700  | -1.51531400 | -1.71244900 |
| C  | 3.30608600  | -0.66201500 | -2.77671400 |
| C  | 4.48590000  | -0.85830800 | -3.49580100 |
| C  | 5.34321300  | -1.90099300 | -3.11673700 |
| C  | 5.03362800  | -2.75074100 | -2.05377300 |
| C  | 3.82723400  | -2.56042400 | -1.36692900 |
| H  | 2.64120600  | 0.15627800  | -3.03635100 |
| H  | 6.27709500  | -2.04550000 | -3.65727900 |
| H  | 3.57879400  | -3.22957400 | -0.55116100 |
| C  | -3.72104600 | -1.92143000 | 1.00660700  |
| O  | -3.01646200 | -2.77574400 | 1.55955700  |
| H  | -4.37251700 | -0.03632900 | 0.83703400  |
| H  | -1.64098500 | 1.37451400  | 1.62907000  |
| C  | -1.68612500 | -0.00528100 | -0.49222400 |
| O  | -2.51432200 | 0.89792400  | -0.61554400 |
| C  | -0.52472000 | 0.17206500  | 2.99883800  |
| C  | 0.04308800  | 1.30236800  | 3.59294200  |
| C  | -0.15092100 | -1.10036000 | 3.44949600  |
| C  | 0.98324500  | 1.16370900  | 4.61537800  |
| H  | -0.24769400 | 2.28957100  | 3.24997100  |
| C  | 0.79200300  | -1.23834500 | 4.46691700  |
| H  | -0.60489100 | -1.98727400 | 3.01453100  |
| C  | 1.36574100  | -0.10655400 | 5.05140600  |
| H  | 1.40947500  | 2.05012700  | 5.07689400  |
| H  | 1.06558100  | -2.23101200 | 4.81048400  |
| H  | 2.09108200  | -0.21382000 | 5.85374100  |
| C  | -3.62878400 | 1.04815500  | 3.18030800  |
| C  | -3.80044700 | 1.04215100  | 4.56621100  |
| C  | -4.01148500 | 2.17887800  | 2.44587500  |
| C  | -4.35569900 | 2.14665700  | 5.21473400  |

|   |             |             |             |
|---|-------------|-------------|-------------|
| H | -3.49142300 | 0.17150800  | 5.13856900  |
| C | -4.57375600 | 3.27774500  | 3.09195600  |
| H | -3.84261700 | 2.20366700  | 1.37250700  |
| C | -4.74729900 | 3.26479600  | 4.47793600  |
| H | -4.48193300 | 2.13234000  | 6.29374000  |
| H | -4.86757400 | 4.14931600  | 2.51408700  |
| H | -5.18034900 | 4.12481700  | 4.98109700  |
| C | -4.63500000 | -2.13492200 | -0.24176600 |
| O | -5.36515300 | -1.18652600 | -0.55374900 |
| N | -4.64356500 | -3.31660900 | -0.90539300 |
| C | -3.66424900 | -4.40746500 | -0.69705900 |
| C | -5.70752300 | -3.54729100 | -1.91805900 |
| H | -5.56504400 | -4.58369900 | -2.23233300 |
| C | -5.54170700 | -2.66185200 | -3.15788600 |
| C | 3.35413000  | -3.66664800 | 3.48806200  |
| H | 3.23685200  | -4.55365600 | 4.11786100  |
| H | 4.35014500  | -3.70388100 | 3.03107100  |
| H | 3.32950600  | -2.78449300 | 4.13967000  |
| C | -0.93624500 | -5.39386300 | 1.42711400  |
| H | -0.74865800 | -6.23154100 | 2.10597000  |
| H | -1.85379300 | -4.88798600 | 1.74493600  |
| H | -1.11405700 | -5.80284300 | 0.42634300  |
| C | 5.99603900  | -3.82426100 | -1.60736900 |
| H | 6.68716100  | -4.10510800 | -2.40865300 |
| H | 6.59820800  | -3.47299700 | -0.75856300 |
| H | 5.46803100  | -4.72642700 | -1.27967800 |
| C | 4.82700700  | 0.04542100  | -4.65632700 |
| H | 5.89701000  | 0.28231900  | -4.68027900 |
| H | 4.58050100  | -0.43171000 | -5.61384200 |
| H | 4.26605600  | 0.98303200  | -4.60228000 |
| H | -2.91794700 | -4.00491600 | -0.02294100 |
| H | -4.54460100 | -2.78721200 | -3.58860100 |
| H | -6.28151700 | -2.94694100 | -3.91469300 |
| H | -5.68651600 | -1.61144400 | -2.90119100 |
| C | -7.10950300 | -3.45296200 | -1.30516700 |
| H | -7.33327900 | -2.43247200 | -0.99162700 |
| H | -7.85287600 | -3.76386900 | -2.04781300 |
| H | -7.19457600 | -4.11560900 | -0.43731700 |
| C | -2.95539000 | -4.78941600 | -2.00185800 |
| H | -2.48507800 | -3.91477100 | -2.45882200 |
| H | -2.17076600 | -5.52160200 | -1.78010500 |
| H | -3.62654400 | -5.24682700 | -2.73690400 |
| C | -4.32248200 | -5.60229500 | -0.00109300 |
| H | -4.72273200 | -5.29420300 | 0.96949100  |

|   |             |             |             |
|---|-------------|-------------|-------------|
| H | -5.13848100 | -6.02649200 | -0.59708000 |
| H | -3.58635200 | -6.39573300 | 0.16634900  |
| C | -1.36080600 | 3.70430400  | 0.15558700  |
| C | -0.06443400 | 3.18790900  | 0.15287000  |
| C | 0.88070400  | 3.62408200  | 1.10288300  |
| C | 0.49802300  | 4.57250400  | 2.05566100  |
| C | -0.80605700 | 5.08245700  | 2.06882400  |
| C | -1.72868000 | 4.65166000  | 1.11802300  |
| H | -2.08067900 | 3.32712600  | -0.55898500 |
| H | 1.22541600  | 4.91860100  | 2.78469300  |
| H | -1.09534000 | 5.80938500  | 2.82291500  |
| H | -2.74493400 | 5.03494300  | 1.13074000  |
| C | 2.26210500  | 3.03525900  | 1.02399100  |
| H | 2.79894500  | 3.41621100  | 0.14870100  |
| N | 0.33942200  | 2.11919500  | -0.71848200 |
| S | 0.78310700  | 2.56426800  | -2.24042000 |
| C | -0.65136200 | 3.39682300  | -2.91060500 |
| C | -1.74944600 | 2.63684100  | -3.31518100 |
| C | -0.68639200 | 4.78798800  | -2.94375400 |
| C | -2.89714400 | 3.28883100  | -3.75208200 |
| H | -1.70074200 | 1.55687600  | -3.27307800 |
| C | -1.84496200 | 5.42619600  | -3.38537000 |
| H | 0.18184200  | 5.35065800  | -2.62034100 |
| C | -2.96445000 | 4.69026500  | -3.79083400 |
| H | -3.76039400 | 2.70340000  | -4.05946200 |
| H | -1.88246800 | 6.51235700  | -3.40846600 |
| O | 1.89582900  | 3.54091600  | -2.26721800 |
| O | 0.96307500  | 1.31331900  | -3.01228700 |
| C | -4.21454200 | 5.38174600  | -4.27729100 |
| H | -5.11399100 | 4.92987100  | -3.84382600 |
| H | -4.30946100 | 5.30683000  | -5.36850400 |
| H | -4.20975900 | 6.44522700  | -4.01879200 |
| C | 3.07503200  | 3.13787700  | 2.25396500  |
| H | 2.56571400  | 2.86792200  | 3.17892400  |
| C | 4.36523100  | 3.50017800  | 2.31326500  |
| H | 4.91654000  | 3.78280900  | 1.41909400  |
| H | 4.91198600  | 3.51126400  | 3.25224100  |
| C | 6.40202200  | 0.16394100  | -0.61019900 |
| C | 5.11297700  | 0.50655000  | -0.22749600 |
| C | 4.65347200  | 0.21886600  | 1.07864600  |
| C | 5.53600800  | -0.40692400 | 1.99100300  |
| C | 6.81517100  | -0.77577800 | 1.59579100  |
| C | 7.24688500  | -0.48806000 | 0.29466400  |
| H | 6.74427700  | 0.38293800  | -1.61555900 |



|   |            |             |             |
|---|------------|-------------|-------------|
| H | 4.43412800 | 0.99543800  | -0.91642600 |
| H | 5.18792900 | -0.61414300 | 2.99952500  |
| H | 7.48268700 | -1.27265600 | 2.29344400  |
| H | 8.25053400 | -0.76919800 | -0.01253900 |
| C | 3.29133000 | 0.47964600  | 1.44638500  |
| H | 3.08504800 | 0.34754700  | 2.51509100  |

**M6<sub>dia</sub>**

|    |             |             |             |
|----|-------------|-------------|-------------|
| C  | -2.48995900 | 0.55757600  | 2.72875300  |
| C  | -1.15336200 | 0.81714500  | 1.91161800  |
| H  | -2.25376000 | -0.13377000 | 3.53941300  |
| N  | -3.50722700 | -0.09937100 | 1.93613800  |
| N  | -0.97569900 | -0.11611200 | 0.81897200  |
| H  | -0.56813400 | -1.01806300 | 1.02262000  |
| C  | -1.50262700 | -0.96702100 | -1.41190200 |
| C  | -0.30549000 | -1.63175400 | -1.75856500 |
| C  | -0.33299900 | -2.54196400 | -2.82760100 |
| C  | -1.49969800 | -2.78440500 | -3.54711800 |
| C  | -2.67552700 | -2.11517300 | -3.20996900 |
| C  | -2.67135100 | -1.22070600 | -2.14525600 |
| P  | 1.32869700  | -1.30843900 | -0.96561000 |
| H  | 0.57904800  | -3.04783700 | -3.11949300 |
| H  | -1.48298400 | -3.48667400 | -4.37550000 |
| H  | -3.58754800 | -2.28367700 | -3.77409000 |
| H  | -3.56901300 | -0.68197100 | -1.86341900 |
| Pd | 2.14199900  | 0.92230200  | -0.54508100 |
| C  | 1.32968900  | -2.39028700 | 0.52443000  |
| C  | 0.26232000  | -3.22165700 | 0.88499300  |
| C  | 0.32575900  | -3.99819000 | 2.05432200  |
| C  | 1.48065800  | -3.93941600 | 2.83834600  |
| C  | 2.57061500  | -3.13324700 | 2.48714500  |
| C  | 2.47501500  | -2.36213800 | 1.33084300  |
| H  | -0.62135900 | -3.27795200 | 0.25620300  |
| H  | 1.53581900  | -4.54398000 | 3.74117500  |
| H  | 3.30878500  | -1.73751200 | 1.04588100  |
| C  | 2.54390200  | -2.13232300 | -2.06609300 |
| C  | 3.01246000  | -1.40273400 | -3.17016400 |
| C  | 3.97620500  | -1.94864800 | -4.02046000 |
| C  | 4.47325200  | -3.22961300 | -3.74075700 |
| C  | 4.02042300  | -3.97288700 | -2.64774400 |
| C  | 3.04291100  | -3.41345500 | -1.81367800 |
| H  | 2.59458700  | -0.42169400 | -3.37568800 |
| H  | 5.23067700  | -3.65886300 | -4.39444900 |
| H  | 2.67772800  | -3.98282300 | -0.96486200 |

|   |             |             |             |
|---|-------------|-------------|-------------|
| C | -3.53191600 | -1.43255200 | 1.77706000  |
| O | -2.79798300 | -2.21447900 | 2.39391400  |
| H | -4.10746500 | 0.43001800  | 1.31364400  |
| H | -1.22856100 | 1.80105400  | 1.45232800  |
| C | -1.67562400 | 0.06443000  | -0.33524400 |
| O | -2.47973700 | 0.98588600  | -0.48445100 |
| C | 0.00376300  | 0.79924100  | 2.88171100  |
| C | 0.62010600  | 1.99941000  | 3.24983700  |
| C | 0.38826500  | -0.39161800 | 3.51327800  |
| C | 1.58768400  | 2.01484200  | 4.25685600  |
| H | 0.33153700  | 2.92123600  | 2.75579600  |
| C | 1.35924800  | -0.37695600 | 4.51337900  |
| H | -0.09502100 | -1.32883600 | 3.24928300  |
| C | 1.94827700  | 0.82949900  | 4.90066600  |
| H | 2.04828000  | 2.95593300  | 4.54432100  |
| H | 1.63790400  | -1.30586600 | 5.00236600  |
| H | 2.67797600  | 0.84579500  | 5.70597900  |
| C | -2.98601600 | 1.86816700  | 3.29324300  |
| C | -2.94489000 | 2.11260600  | 4.66764500  |
| C | -3.44082600 | 2.87418900  | 2.43022000  |
| C | -3.36130400 | 3.34256300  | 5.17997900  |
| H | -2.57842700 | 1.33837700  | 5.33646300  |
| C | -3.86528100 | 4.09856200  | 2.94225400  |
| H | -3.43696900 | 2.70143900  | 1.35739500  |
| C | -3.82640500 | 4.33627700  | 4.31815500  |
| H | -3.32277300 | 3.52276300  | 6.25070300  |
| H | -4.21832800 | 4.87160400  | 2.26560500  |
| H | -4.15251100 | 5.29348100  | 4.71535900  |
| C | -4.64652700 | -1.82009500 | 0.75526300  |
| O | -5.38495500 | -0.90338300 | 0.37508000  |
| N | -4.80943200 | -3.10686900 | 0.36205300  |
| C | -3.83333400 | -4.19178700 | 0.61202700  |
| C | -6.04726600 | -3.46626800 | -0.37875800 |
| H | -5.99514300 | -4.55195100 | -0.48736200 |
| C | -6.09072300 | -2.86231400 | -1.78658100 |
| C | 3.80533200  | -3.06283900 | 3.35093100  |
| H | 3.94529900  | -3.98322500 | 3.92706000  |
| H | 4.70369300  | -2.88885000 | 2.75013000  |
| H | 3.73321700  | -2.22970300 | 4.06067500  |
| C | -0.83216900 | -4.87300800 | 2.46156600  |
| H | -0.54918900 | -5.55425000 | 3.27003300  |
| H | -1.67105400 | -4.25805100 | 2.80200100  |
| H | -1.18610600 | -5.47816100 | 1.61938700  |
| C | 4.58631100  | -5.34109000 | -2.34928700 |

|   |             |             |             |
|---|-------------|-------------|-------------|
| H | 4.95219400  | -5.82989000 | -3.25808800 |
| H | 5.42992400  | -5.27742400 | -1.64930200 |
| H | 3.83423000  | -5.99220100 | -1.89104400 |
| C | 4.46128000  | -1.17674200 | -5.22399200 |
| H | 5.55647900  | -1.15770900 | -5.27281200 |
| H | 4.10408600  | -1.63413800 | -6.15533500 |
| H | 4.09985700  | -0.14481700 | -5.20138100 |
| H | -2.96650900 | -3.70978200 | 1.04796600  |
| H | -5.19689300 | -3.13964400 | -2.35164700 |
| H | -6.96768800 | -3.24331000 | -2.32238400 |
| H | -6.15349800 | -1.77434600 | -1.73543100 |
| C | -7.30827400 | -3.15638900 | 0.43614400  |
| H | -7.43727600 | -2.08092100 | 0.56534600  |
| H | -8.18564400 | -3.55521000 | -0.08527700 |
| H | -7.25362700 | -3.62684400 | 1.42365900  |
| C | -3.38496000 | -4.86339400 | -0.69127500 |
| H | -2.98574100 | -4.12514000 | -1.39163600 |
| H | -2.59076500 | -5.58372100 | -0.46471900 |
| H | -4.19020500 | -5.41494800 | -1.18855600 |
| C | -4.37870700 | -5.18658900 | 1.64051700  |
| H | -4.58783800 | -4.67110000 | 2.58250300  |
| H | -5.29869500 | -5.67149800 | 1.29451200  |
| H | -3.64199800 | -5.97324200 | 1.83441900  |
| C | -1.06781700 | 3.69038200  | -0.45515500 |
| C | 0.19019200  | 3.09701500  | -0.58259500 |
| C | 1.30443300  | 3.62840800  | 0.09085600  |
| C | 1.12715000  | 4.74503600  | 0.91521300  |
| C | -0.13578700 | 5.32876300  | 1.06406100  |
| C | -1.22763800 | 4.80608600  | 0.37271000  |
| H | -1.91334100 | 3.24423700  | -0.96093900 |
| H | 1.98524400  | 5.16741000  | 1.43012800  |
| H | -0.26120000 | 6.18863300  | 1.71658700  |
| H | -2.21146900 | 5.25131000  | 0.48901600  |
| C | 2.65053700  | 2.99202900  | -0.14519900 |
| H | 3.03622200  | 3.26763600  | -1.13177100 |
| N | 0.39812000  | 1.87959500  | -1.30914900 |
| S | 0.57966400  | 2.05001400  | -2.94525000 |
| C | -0.97281400 | 2.73299200  | -3.51179100 |
| C | -2.07675100 | 1.89349000  | -3.65299700 |
| C | -1.07967800 | 4.10528600  | -3.72760400 |
| C | -3.30437600 | 2.44321400  | -4.00637100 |
| H | -1.96808800 | 0.83097200  | -3.48336500 |
| C | -2.31718500 | 4.64053600  | -4.08076900 |
| H | -0.20402100 | 4.73325000  | -3.61114000 |

|   |             |             |             |
|---|-------------|-------------|-------------|
| C | -3.44509000 | 3.82218700  | -4.22094800 |
| H | -4.17114100 | 1.79469400  | -4.10849000 |
| H | -2.41032400 | 5.71125500  | -4.24429600 |
| O | 1.62729200  | 3.02821400  | -3.31300700 |
| O | 0.69718000  | 0.68044400  | -3.49703300 |
| C | -4.77945400 | 4.40374200  | -4.61930400 |
| H | -5.60376100 | 3.90456100  | -4.09827900 |
| H | -4.95693500 | 4.28464100  | -5.69644200 |
| H | -4.83240800 | 5.47390000  | -4.39507100 |
| C | 3.62888200  | 3.25554500  | 0.92507800  |
| H | 3.26914600  | 3.09853100  | 1.94248800  |
| C | 4.88933500  | 3.67680900  | 0.75457900  |
| H | 5.29799100  | 3.86005300  | -0.23722000 |
| H | 5.55468800  | 3.83871000  | 1.59821300  |
| C | 5.05001500  | 0.40838100  | 3.37436600  |
| C | 4.23367800  | 0.50396100  | 2.25770000  |
| C | 4.75762400  | 0.25938900  | 0.96540600  |
| C | 6.12724600  | -0.07631400 | 0.83913400  |
| C | 6.94484900  | -0.15917300 | 1.95899500  |
| C | 6.40360800  | 0.08180800  | 3.22676400  |
| H | 4.63657200  | 0.59217900  | 4.35943400  |
| H | 3.18267400  | 0.74799000  | 2.35399800  |
| H | 6.53048200  | -0.26619600 | -0.15184600 |
| H | 7.99546500  | -0.41215200 | 1.85357800  |
| H | 7.04015800  | 0.01376000  | 4.10479300  |
| C | 3.92491600  | 0.33373700  | -0.19277600 |
| H | 4.44698700  | 0.01551300  | -1.10590300 |

#### TS4

|   |             |             |             |
|---|-------------|-------------|-------------|
| C | -3.08229400 | 0.10794800  | 2.40999600  |
| C | -1.62388600 | 0.38486200  | 1.85449500  |
| H | -3.01329600 | -0.69114900 | 3.15105400  |
| N | -3.97408300 | -0.36964400 | 1.37336400  |
| N | -1.34079600 | -0.34560100 | 0.63791500  |
| H | -1.06197000 | -1.31361300 | 0.71928100  |
| C | -1.41545800 | -0.69179500 | -1.76436200 |
| C | -0.21123600 | -1.40769800 | -1.95191800 |
| C | -0.04742000 | -2.13993300 | -3.13816900 |
| C | -1.02885600 | -2.14737500 | -4.12666000 |
| C | -2.20048200 | -1.41263100 | -3.94842400 |
| C | -2.39050700 | -0.69952300 | -2.76914300 |
| P | 1.23447800  | -1.32011500 | -0.80832000 |
| H | 0.87526600  | -2.68383600 | -3.30494500 |
| H | -0.86841100 | -2.71516600 | -5.03854200 |

|    |             |             |             |
|----|-------------|-------------|-------------|
| H  | -2.96191100 | -1.39473000 | -4.72208900 |
| H  | -3.29797000 | -0.13131400 | -2.59717400 |
| Pd | 1.73177300  | 0.62007700  | 0.22129400  |
| C  | 1.03390500  | -2.72305200 | 0.35307400  |
| C  | -0.08861100 | -3.55394600 | 0.36113600  |
| C  | -0.22033500 | -4.56515700 | 1.32941300  |
| C  | 0.81257800  | -4.74914100 | 2.24964500  |
| C  | 1.96083200  | -3.94275300 | 2.24419400  |
| C  | 2.04522500  | -2.91855200 | 1.30611400  |
| H  | -0.86945000 | -3.42077700 | -0.38188000 |
| H  | 0.72317100  | -5.54059100 | 2.99097200  |
| H  | 2.90888200  | -2.26474700 | 1.30865600  |
| C  | 2.67807900  | -1.74684000 | -1.85045000 |
| C  | 3.03404100  | -0.82035900 | -2.84432800 |
| C  | 4.19977900  | -0.99887800 | -3.59043600 |
| C  | 5.01394200  | -2.10671400 | -3.31417700 |
| C  | 4.67961500  | -3.03578800 | -2.32663200 |
| C  | 3.49234000  | -2.85458700 | -1.60502700 |
| H  | 2.40131000  | 0.04475000  | -3.02526200 |
| H  | 5.93633000  | -2.24050900 | -3.87674200 |
| H  | 3.22550200  | -3.57354100 | -0.83835100 |
| C  | -3.94224300 | -1.64083900 | 0.94076600  |
| O  | -3.27867200 | -2.53407900 | 1.48280700  |
| H  | -4.50004300 | 0.27699500  | 0.79527700  |
| H  | -1.57240000 | 1.43640700  | 1.57813400  |
| C  | -1.76612900 | 0.13145100  | -0.56188600 |
| O  | -2.44787800 | 1.15393700  | -0.66647800 |
| C  | -0.59253400 | 0.10080200  | 2.92001900  |
| C  | 0.06411800  | 1.16473200  | 3.54363900  |
| C  | -0.30384300 | -1.21150500 | 3.31524300  |
| C  | 1.02315200  | 0.92397300  | 4.52811600  |
| H  | -0.17033800 | 2.18083200  | 3.25075700  |
| C  | 0.65382200  | -1.45177700 | 4.29933200  |
| H  | -0.82956200 | -2.04695700 | 2.86034900  |
| C  | 1.32577400  | -0.38630000 | 4.90442000  |
| H  | 1.53050800  | 1.76251400  | 4.99730300  |
| H  | 0.86710900  | -2.47343600 | 4.59665500  |
| H  | 2.07015300  | -0.57709200 | 5.67302600  |
| C  | -3.61051800 | 1.37275300  | 3.04621700  |
| C  | -3.79639200 | 1.45742900  | 4.42725600  |
| C  | -3.86089900 | 2.49901100  | 2.24863800  |
| C  | -4.23595000 | 2.64809100  | 5.00980100  |
| H  | -3.59002300 | 0.58997800  | 5.04855900  |
| C  | -4.30962800 | 3.68359800  | 2.82890100  |

|   |             |             |             |
|---|-------------|-------------|-------------|
| H | -3.67777900 | 2.44716400  | 1.17814800  |
| C | -4.49715300 | 3.76180200  | 4.21141300  |
| H | -4.37458700 | 2.70344000  | 6.08589300  |
| H | -4.50606000 | 4.54917000  | 2.20213000  |
| H | -4.84125000 | 4.68785300  | 4.66341000  |
| C | -4.88123600 | -1.79318600 | -0.29828800 |
| O | -5.54314800 | -0.79375400 | -0.60548700 |
| N | -4.98050400 | -2.97102300 | -0.95919900 |
| C | -4.08330100 | -4.13182800 | -0.75725700 |
| C | -6.05472000 | -3.11888800 | -1.97717300 |
| H | -5.98531200 | -4.16111000 | -2.29679100 |
| C | -5.82155900 | -2.24141200 | -3.21183700 |
| C | 3.06644100  | -4.15087000 | 3.25029700  |
| H | 3.98424000  | -3.64506700 | 2.93501900  |
| H | 2.78923000  | -3.74655100 | 4.23239300  |
| H | 3.28830800  | -5.21489900 | 3.38776800  |
| C | -1.46031200 | -5.42129900 | 1.37853000  |
| H | -1.33988900 | -6.25578700 | 2.07611600  |
| H | -2.32180900 | -4.82530400 | 1.69752200  |
| H | -1.69447800 | -5.83746400 | 0.39211000  |
| C | 5.60478200  | -4.17871800 | -1.98806700 |
| H | 6.25222000  | -3.90878100 | -1.14297600 |
| H | 5.04692300  | -5.07558600 | -1.69768400 |
| H | 6.25272700  | -4.43710800 | -2.83194800 |
| C | 4.56566300  | -0.00727700 | -4.66848000 |
| H | 4.12488200  | 0.97293200  | -4.46333100 |
| H | 5.65168700  | 0.10957600  | -4.75385800 |
| H | 4.19461400  | -0.33581000 | -5.64817100 |
| H | -3.32408300 | -3.79641400 | -0.06075000 |
| H | -4.83232700 | -2.43132400 | -3.63689300 |
| H | -6.57443600 | -2.47370200 | -3.97376500 |
| H | -5.89674700 | -1.18438300 | -2.95264500 |
| C | -7.44799300 | -2.92795100 | -1.36709300 |
| H | -7.59823400 | -1.89612200 | -1.04684800 |
| H | -8.20970000 | -3.17879700 | -2.11381200 |
| H | -7.58343400 | -3.58903200 | -0.50449000 |
| C | -3.38057400 | -4.53384800 | -2.05929600 |
| H | -2.83786600 | -3.68632300 | -2.48604100 |
| H | -2.65825800 | -5.32952300 | -1.84492600 |
| H | -4.07216100 | -4.91820000 | -2.81688900 |
| C | -4.83614100 | -5.29259400 | -0.10031400 |
| H | -5.24040900 | -4.97776300 | 0.86657000  |
| H | -5.66305300 | -5.65393900 | -0.72238500 |
| H | -4.15681400 | -6.13452800 | 0.06876200  |

|   |             |             |             |
|---|-------------|-------------|-------------|
| C | -0.65049700 | 3.81405500  | 0.66632300  |
| C | 0.52063700  | 3.08838700  | 0.42328400  |
| C | 1.61758000  | 3.19070700  | 1.33089300  |
| C | 1.48749600  | 4.07043700  | 2.41618400  |
| C | 0.31698000  | 4.79851400  | 2.64097300  |
| C | -0.76072900 | 4.66217000  | 1.76910900  |
| H | -1.48168400 | 3.66991600  | -0.01261900 |
| H | 2.32208200  | 4.19758500  | 3.09594400  |
| H | 0.25237600  | 5.46204900  | 3.49876500  |
| H | -1.68887700 | 5.19590100  | 1.94981800  |
| C | 2.90822500  | 2.41129600  | 1.13502800  |
| H | 3.32596800  | 2.57531200  | 0.13858800  |
| N | 0.52614100  | 2.13586700  | -0.64428800 |
| S | 1.02291000  | 2.61100100  | -2.12351200 |
| C | -0.16647600 | 3.85703200  | -2.61525500 |
| C | -1.51595600 | 3.50525700  | -2.70882600 |
| C | 0.25916200  | 5.15598300  | -2.87342800 |
| C | -2.43998200 | 4.47948400  | -3.07146500 |
| H | -1.83658800 | 2.50133400  | -2.45321100 |
| C | -0.68280700 | 6.11967800  | -3.23703000 |
| H | 1.31243500  | 5.39653000  | -2.78262900 |
| C | -2.03987900 | 5.79745500  | -3.34453300 |
| H | -3.49344300 | 4.21694400  | -3.13543700 |
| H | -0.35766400 | 7.13801900  | -3.43555400 |
| O | 2.35560600  | 3.26325300  | -2.12824300 |
| O | 0.84429400  | 1.44546700  | -3.01855200 |
| C | -3.05386700 | 6.83546200  | -3.75939500 |
| H | -2.66918500 | 7.85036600  | -3.61712600 |
| H | -3.98231100 | 6.73910800  | -3.18549300 |
| H | -3.31748900 | 6.72866800  | -4.81997200 |
| C | 3.93625500  | 2.63185200  | 2.17999900  |
| H | 3.63231400  | 2.44971300  | 3.21038800  |
| C | 5.19047000  | 3.02410200  | 1.93248100  |
| H | 5.53596700  | 3.21623800  | 0.91996400  |
| H | 5.91229600  | 3.15497400  | 2.73344800  |
| C | 6.27598500  | -0.58957500 | -0.36217100 |
| C | 5.02823700  | -0.04679700 | -0.07947500 |
| C | 4.46939100  | -0.16690500 | 1.20905100  |
| C | 5.21201900  | -0.83120900 | 2.20707800  |
| C | 6.45246900  | -1.39236400 | 1.91711600  |
| C | 6.98678700  | -1.27212200 | 0.63046400  |
| H | 6.68598900  | -0.49850200 | -1.36263100 |
| H | 4.45957000  | 0.45735200  | -0.85285100 |
| H | 4.79197600  | -0.91385500 | 3.20625500  |

|   |            |             |            |
|---|------------|-------------|------------|
| H | 7.00797500 | -1.91384500 | 2.69166100 |
| H | 7.95786600 | -1.70369700 | 0.40368000 |
| C | 3.12008700 | 0.28707500  | 1.49384500 |
| H | 2.81640100 | 0.17512900  | 2.53797500 |

**TS4<sub>dia</sub>**

|    |             |             |             |
|----|-------------|-------------|-------------|
| C  | -2.70198900 | 0.76554700  | 2.47052100  |
| C  | -1.23109800 | 0.79226500  | 1.84403400  |
| H  | -2.64785600 | 0.19078300  | 3.39729000  |
| N  | -3.66184500 | 0.08663000  | 1.62817900  |
| N  | -1.05703300 | -0.15192000 | 0.76237300  |
| H  | -0.76599700 | -1.09440500 | 0.98413100  |
| C  | -1.51490600 | -0.93671100 | -1.50365800 |
| C  | -0.38228700 | -1.73865000 | -1.76491600 |
| C  | -0.45889200 | -2.68298700 | -2.80149900 |
| C  | -1.60501100 | -2.81522400 | -3.58194000 |
| C  | -2.70728600 | -1.99751100 | -3.33955900 |
| C  | -2.66061000 | -1.07603900 | -2.29858100 |
| P  | 1.25761400  | -1.52322500 | -0.94131500 |
| H  | 0.40167200  | -3.30252400 | -3.02240400 |
| H  | -1.62644600 | -3.54684100 | -4.38441100 |
| H  | -3.59808100 | -2.07553400 | -3.95456200 |
| H  | -3.51213400 | -0.44311100 | -2.07539000 |
| Pd | 2.12405500  | 0.53252700  | -0.60401200 |
| C  | 1.19468300  | -2.55753600 | 0.56725600  |
| C  | 0.10248400  | -3.37046400 | 0.88982200  |
| C  | 0.08523000  | -4.09019800 | 2.09505700  |
| C  | 1.19110000  | -4.00005800 | 2.94396600  |
| C  | 2.30197500  | -3.20316500 | 2.63492000  |
| C  | 2.28586200  | -2.47833200 | 1.44422300  |
| H  | -0.73939500 | -3.44536300 | 0.20737600  |
| H  | 1.18516300  | -4.56084000 | 3.87650900  |
| H  | 3.11988500  | -1.83358700 | 1.19726300  |
| C  | 2.41703000  | -2.36503400 | -2.07688000 |
| C  | 2.74122000  | -1.68317500 | -3.26285800 |
| C  | 3.65807800  | -2.23113200 | -4.15822100 |
| C  | 4.25282500  | -3.46409500 | -3.84253700 |
| C  | 3.94341300  | -4.15482700 | -2.67028000 |
| C  | 3.00839500  | -3.59361200 | -1.78590700 |
| H  | 2.26153000  | -0.73189300 | -3.48345800 |
| H  | 4.97739400  | -3.89294800 | -4.53238700 |
| H  | 2.75375900  | -4.11854600 | -0.86988100 |
| C  | -3.71053300 | -1.25168200 | 1.53474600  |
| O  | -3.03676900 | -2.01736100 | 2.23568500  |



|   |             |             |             |
|---|-------------|-------------|-------------|
| H | -4.22003400 | 0.59763700  | 0.95387300  |
| H | -1.08654900 | 1.77527700  | 1.40213000  |
| C | -1.63256800 | 0.11500200  | -0.44113200 |
| O | -2.29536100 | 1.13363000  | -0.64213200 |
| C | -0.24319200 | 0.59734700  | 2.96599400  |
| C | 0.41057300  | 1.71145700  | 3.50214700  |
| C | -0.07928100 | -0.65459000 | 3.57317600  |
| C | 1.19713700  | 1.58154000  | 4.64839600  |
| H | 0.29002300  | 2.68014800  | 3.02876900  |
| C | 0.72159500  | -0.78634400 | 4.70565100  |
| H | -0.61059900 | -1.51881000 | 3.18642200  |
| C | 1.34761900  | 0.33423600  | 5.25698200  |
| H | 1.69009500  | 2.45661000  | 5.06288800  |
| H | 0.83781000  | -1.76224100 | 5.16787100  |
| H | 1.94715900  | 0.23405300  | 6.15805700  |
| C | -3.12560300 | 2.18562800  | 2.76723000  |
| C | -3.14515200 | 2.65620500  | 4.08240600  |
| C | -3.41902000 | 3.06958400  | 1.71837400  |
| C | -3.45973500 | 3.98959100  | 4.35310100  |
| H | -2.90436400 | 1.97760000  | 4.89637500  |
| C | -3.74335600 | 4.39748500  | 1.98987100  |
| H | -3.35623300 | 2.71875900  | 0.69261500  |
| C | -3.76254100 | 4.86244400  | 3.30781200  |
| H | -3.46924000 | 4.34378400  | 5.38016100  |
| H | -3.97046900 | 5.07240300  | 1.16911400  |
| H | -4.01004700 | 5.89938100  | 3.51743300  |
| C | -4.76757300 | -1.66332500 | 0.46230300  |
| O | -5.45366200 | -0.74819700 | -0.01094200 |
| N | -4.94408200 | -2.96370600 | 0.12808400  |
| C | -4.00614100 | -4.05520100 | 0.47797300  |
| C | -6.14630600 | -3.33279500 | -0.66498400 |
| H | -6.11605800 | -4.42364600 | -0.71357400 |
| C | -6.09635800 | -2.80572600 | -2.10286500 |
| C | 3.46162300  | -3.07996200 | 3.59025600  |
| H | 4.38594600  | -2.81819400 | 3.06724300  |
| H | 3.27150600  | -2.28107800 | 4.31708500  |
| H | 3.62372800  | -4.00923700 | 4.14679500  |
| C | -1.11595600 | -4.91710800 | 2.47778800  |
| H | -0.89384100 | -5.57372700 | 3.32463500  |
| H | -1.95137700 | -4.26602200 | 2.75762400  |
| H | -1.45080400 | -5.54302700 | 1.64317900  |
| C | 4.60251300  | -5.47290700 | -2.34068300 |
| H | 5.29001700  | -5.37149900 | -1.49133600 |
| H | 3.86096100  | -6.23180000 | -2.06456700 |

|   |             |             |             |
|---|-------------|-------------|-------------|
| H | 5.17734100  | -5.85507200 | -3.18982400 |
| C | 4.00079900  | -1.51582700 | -5.44272900 |
| H | 5.08601500  | -1.43292300 | -5.57506300 |
| H | 3.60938600  | -2.05715600 | -6.31345100 |
| H | 3.57592800  | -0.50820800 | -5.45700500 |
| H | -3.16112300 | -3.57286900 | 0.95565600  |
| H | -5.18454400 | -3.14021600 | -2.60428400 |
| H | -6.95677900 | -3.18932200 | -2.66315500 |
| H | -6.12610700 | -1.71519000 | -2.11378600 |
| C | -7.44139000 | -2.95076900 | 0.06078300  |
| H | -7.54812500 | -1.86722500 | 0.12903300  |
| H | -8.29921000 | -3.35398000 | -0.48883500 |
| H | -7.45348500 | -3.37121200 | 1.07194700  |
| C | -3.48821200 | -4.77442300 | -0.77290200 |
| H | -3.02413400 | -4.06653400 | -1.46482500 |
| H | -2.73008700 | -5.50733400 | -0.47439800 |
| H | -4.27298400 | -5.31953600 | -1.30840400 |
| C | -4.63570000 | -5.00740900 | 1.49889100  |
| H | -4.89205500 | -4.45992000 | 2.41073300  |
| H | -5.54207500 | -5.48677600 | 1.11159300  |
| H | -3.92874400 | -5.80111200 | 1.76112500  |
| C | -0.19001400 | 3.75179500  | 0.14901500  |
| C | 0.87429900  | 2.98737400  | -0.33283100 |
| C | 2.18896500  | 3.18664900  | 0.18975700  |
| C | 2.35399100  | 4.11548900  | 1.22447500  |
| C | 1.27448100  | 4.85774900  | 1.71621100  |
| C | 0.00387400  | 4.68690200  | 1.17032800  |
| H | -1.17526600 | 3.56471700  | -0.26021500 |
| H | 3.34223100  | 4.28844000  | 1.63608500  |
| H | 1.43609100  | 5.57176000  | 2.51917100  |
| H | -0.84437500 | 5.24641800  | 1.55365800  |
| C | 3.36310500  | 2.46672300  | -0.43968400 |
| H | 3.28640500  | 2.50224800  | -1.52950200 |
| N | 0.61967700  | 1.89986800  | -1.22372200 |
| S | 0.66067500  | 2.17400500  | -2.83899800 |
| C | -0.78631400 | 3.17883100  | -3.14829800 |
| C | -2.02922100 | 2.56496200  | -3.30098100 |
| C | -0.66864500 | 4.56783500  | -3.12154600 |
| C | -3.16442600 | 3.35961300  | -3.42523300 |
| H | -2.09740600 | 1.48543100  | -3.30992400 |
| C | -1.81690100 | 5.34892300  | -3.24203300 |
| H | 0.31032100  | 5.01877000  | -3.00558800 |
| C | -3.07821700 | 4.75899400  | -3.39235500 |
| H | -4.13716000 | 2.88701500  | -3.53814500 |

|   |             |             |             |
|---|-------------|-------------|-------------|
| H | -1.73257700 | 6.43258600  | -3.21629900 |
| O | 1.83078900  | 2.98387100  | -3.25674200 |
| O | 0.46252100  | 0.86256100  | -3.49125200 |
| C | -4.31725600 | 5.60765500  | -3.54288800 |
| H | -4.58331400 | 5.73582200  | -4.60056500 |
| H | -4.17211600 | 6.60678700  | -3.11934000 |
| H | -5.17887700 | 5.14803400  | -3.04636700 |
| C | 4.71505500  | 2.90350500  | -0.01769600 |
| H | 4.91619600  | 2.93885700  | 1.05079700  |
| C | 5.68931300  | 3.22937200  | -0.87490300 |
| H | 5.53153100  | 3.20398000  | -1.95060600 |
| H | 6.67055400  | 3.53730000  | -0.52530100 |
| C | 4.43319000  | 0.39791200  | 3.72349900  |
| C | 3.82192700  | 0.53760900  | 2.48249800  |
| C | 4.54700700  | 0.27995000  | 1.30011800  |
| C | 5.89037000  | -0.13896600 | 1.41043300  |
| C | 6.48732800  | -0.31049000 | 2.65573900  |
| C | 5.76074200  | -0.03227300 | 3.81620900  |
| H | 3.86658500  | 0.61306600  | 4.62120100  |
| H | 2.78535000  | 0.84942500  | 2.41144400  |
| H | 6.45741800  | -0.32398400 | 0.50232400  |
| H | 7.51976500  | -0.64174800 | 2.72257800  |
| H | 6.22658800  | -0.14938800 | 4.79075000  |
| C | 3.95285600  | 0.43197100  | -0.01608200 |
| H | 4.68323500  | 0.30584400  | -0.82096800 |

### M7

|   |             |             |             |
|---|-------------|-------------|-------------|
| C | -3.20898100 | 0.60699000  | 1.76235800  |
| C | -1.64812900 | 0.51637100  | 1.46071100  |
| H | -3.37932500 | 0.15435500  | 2.74090500  |
| N | -3.99227100 | -0.16109600 | 0.81554300  |
| N | -1.32343600 | -0.53167000 | 0.50654200  |
| H | -1.00316300 | -1.42034000 | 0.86860300  |
| C | -1.12738700 | -1.51202900 | -1.70894800 |
| C | 0.10813000  | -2.19214000 | -1.62182300 |
| C | 0.34604300  | -3.25274400 | -2.51199000 |
| C | -0.59061500 | -3.60956100 | -3.47915800 |
| C | -1.78681200 | -2.89882000 | -3.58841800 |
| C | -2.05227500 | -1.85978200 | -2.70234900 |
| P | 1.48153900  | -1.65291900 | -0.49384700 |
| H | 1.28746700  | -3.78716300 | -2.46343400 |
| H | -0.37644200 | -4.43124500 | -4.15636200 |
| H | -2.50954800 | -3.15301500 | -4.35729800 |
| H | -2.97929800 | -1.29959000 | -2.75788700 |

|    |             |             |             |
|----|-------------|-------------|-------------|
| Pd | 1.36543700  | 0.64370800  | -0.38265400 |
| C  | 1.23007900  | -2.65658200 | 1.01406600  |
| C  | 0.13090800  | -3.51057500 | 1.17101800  |
| C  | -0.08772500 | -4.17465000 | 2.38587200  |
| C  | 0.83730700  | -4.00167700 | 3.41831400  |
| C  | 1.95057800  | -3.16431500 | 3.28018800  |
| C  | 2.12696900  | -2.48431400 | 2.07489400  |
| H  | -0.56111300 | -3.66501300 | 0.34764100  |
| H  | 0.68022200  | -4.52161100 | 4.36093900  |
| H  | 2.97213700  | -1.81839700 | 1.95443900  |
| C  | 2.95162300  | -2.31630400 | -1.34605900 |
| C  | 3.24795900  | -1.75447300 | -2.59931400 |
| C  | 4.35197900  | -2.19075200 | -3.32706600 |
| C  | 5.17496600  | -3.17884200 | -2.76582500 |
| C  | 4.91741900  | -3.72541700 | -1.50873900 |
| C  | 3.78102400  | -3.29677900 | -0.80741100 |
| H  | 2.61435200  | -0.96684700 | -3.00147000 |
| H  | 6.04976400  | -3.51517600 | -3.31924000 |
| H  | 3.55673600  | -3.72844000 | 0.16300600  |
| C  | -4.04346000 | -1.50296400 | 0.86979300  |
| O  | -3.58820700 | -2.17524600 | 1.80313900  |
| H  | -4.36378300 | 0.26741600  | -0.02459600 |
| H  | -1.34861800 | 1.45369500  | 0.99145500  |
| C  | -1.54894400 | -0.37687400 | -0.82172000 |
| O  | -2.10591000 | 0.61896700  | -1.29066900 |
| C  | -0.86316900 | 0.31723800  | 2.73755700  |
| C  | 0.01705700  | 1.30892400  | 3.17525500  |
| C  | -1.01926300 | -0.84873100 | 3.49906400  |
| C  | 0.75264800  | 1.13474900  | 4.34798100  |
| H  | 0.12535000  | 2.21706200  | 2.60016800  |
| C  | -0.28486500 | -1.02162400 | 4.67147300  |
| H  | -1.72720300 | -1.60780700 | 3.17843400  |
| C  | 0.60469800  | -0.03236500 | 5.09899600  |
| H  | 1.43051700  | 1.92026300  | 4.66975300  |
| H  | -0.41073100 | -1.92987500 | 5.25317500  |
| H  | 1.16635400  | -0.16548900 | 6.02008500  |
| C  | -3.62721300 | 2.05973900  | 1.79160900  |
| C  | -3.96269700 | 2.67041300  | 3.00243000  |
| C  | -3.60538500 | 2.82936400  | 0.61941900  |
| C  | -4.27933400 | 4.02970200  | 3.04681400  |
| H  | -3.96667500 | 2.08112400  | 3.91568900  |
| C  | -3.93107300 | 4.18367200  | 0.66202000  |
| H  | -3.28890700 | 2.37541300  | -0.31480100 |
| C  | -4.26764100 | 4.78840800  | 1.87582200  |

|   |             |             |             |
|---|-------------|-------------|-------------|
| H | -4.53382300 | 4.49337500  | 3.99576600  |
| H | -3.89138500 | 4.76927200  | -0.25137700 |
| H | -4.51377100 | 5.84622300  | 1.90860900  |
| C | -4.79387200 | -2.06415600 | -0.37302500 |
| O | -5.36805600 | -1.23672500 | -1.09184300 |
| N | -4.84363100 | -3.40047300 | -0.59363400 |
| C | -3.96386000 | -4.39343500 | 0.06866100  |
| C | -5.83043800 | -3.91691100 | -1.57865800 |
| H | -5.76789300 | -5.00346600 | -1.48422600 |
| C | -5.47131000 | -3.55198900 | -3.02309800 |
| C | 2.91123800  | -2.94547700 | 4.42130600  |
| H | 3.94491600  | -2.87530600 | 4.06558600  |
| H | 2.67679600  | -2.00624700 | 4.93751800  |
| H | 2.85595200  | -3.75459000 | 5.15635300  |
| C | -1.31927700 | -5.02331100 | 2.57999500  |
| H | -1.24884300 | -5.62773900 | 3.48942100  |
| H | -2.21121800 | -4.39057400 | 2.66128400  |
| H | -1.47575100 | -5.70131300 | 1.73359000  |
| C | 5.85693500  | -4.72549700 | -0.88301900 |
| H | 6.47714000  | -4.23800200 | -0.11925900 |
| H | 5.31219400  | -5.53756000 | -0.38860600 |
| H | 6.52905100  | -5.16705400 | -1.62537000 |
| C | 4.69256200  | -1.57084200 | -4.65963100 |
| H | 3.84560000  | -1.01177900 | -5.06789000 |
| H | 5.53125000  | -0.86908700 | -4.55973100 |
| H | 4.99076300  | -2.32933400 | -5.39217400 |
| H | -3.23199000 | -3.81670400 | 0.62362300  |
| H | -4.46408600 | -3.89840300 | -3.26935900 |
| H | -6.17681800 | -4.03292200 | -3.71017800 |
| H | -5.51998700 | -2.47160500 | -3.16750700 |
| C | -7.26323900 | -3.51656000 | -1.20842900 |
| H | -7.40726900 | -2.43913900 | -1.30119900 |
| H | -7.96637700 | -4.02321400 | -1.87874700 |
| H | -7.49266500 | -3.81654700 | -0.18048100 |
| C | -3.20290800 | -5.24442800 | -0.95520100 |
| H | -2.63239900 | -4.61215800 | -1.64034100 |
| H | -2.49892900 | -5.89359000 | -0.42289700 |
| H | -3.85819400 | -5.89382200 | -1.54513200 |
| C | -4.75349100 | -5.23347400 | 1.07533500  |
| H | -5.18363300 | -4.58314500 | 1.84196700  |
| H | -5.56191800 | -5.79535100 | 0.59333800  |
| H | -4.09336300 | -5.95655200 | 1.56598700  |
| C | -0.29828500 | 4.21238000  | 0.87587000  |
| C | 0.83464200  | 3.46536200  | 0.52986000  |

|   |             |             |             |
|---|-------------|-------------|-------------|
| C | 1.98041700  | 3.48402300  | 1.35026800  |
| C | 1.94939500  | 4.26069300  | 2.51313100  |
| C | 0.81377500  | 4.99526600  | 2.86518500  |
| C | -0.31335900 | 4.97278800  | 2.04350300  |
| H | -1.17229600 | 4.15739200  | 0.23987100  |
| H | 2.82865000  | 4.30668300  | 3.14709500  |
| H | 0.81456500  | 5.58143500  | 3.77995800  |
| H | -1.21056500 | 5.52200300  | 2.31367700  |
| C | 3.19040100  | 2.66817500  | 0.92649400  |
| H | 3.47161000  | 2.99547500  | -0.07962200 |
| N | 0.78591800  | 2.57935600  | -0.56938700 |
| S | 1.08935700  | 3.12705400  | -2.09145300 |
| C | -0.37248500 | 4.08504000  | -2.46849300 |
| C | -1.58359800 | 3.41442700  | -2.65985000 |
| C | -0.31063200 | 5.47563100  | -2.45159200 |
| C | -2.74281500 | 4.16210500  | -2.83805700 |
| H | -1.61715900 | 2.33163400  | -2.63550100 |
| C | -1.48515800 | 6.20826900  | -2.62954000 |
| H | 0.64359500  | 5.96462800  | -2.29101600 |
| C | -2.71378500 | 5.56652500  | -2.82258400 |
| H | -3.69045500 | 3.64844800  | -2.98276800 |
| H | -1.44640800 | 7.29444700  | -2.61106200 |
| O | 2.24597800  | 4.04140600  | -2.16694200 |
| O | 1.08627200  | 1.91266200  | -2.93921200 |
| C | -3.98229300 | 6.35870600  | -3.02617100 |
| H | -3.85660400 | 7.40178800  | -2.71972400 |
| H | -4.81548100 | 5.93356700  | -2.45454300 |
| H | -4.28348500 | 6.35763500  | -4.08175800 |
| C | 4.37277700  | 2.89321600  | 1.84107600  |
| H | 4.27235100  | 2.50609600  | 2.85619600  |
| C | 5.50427000  | 3.49358000  | 1.47623600  |
| H | 5.64117800  | 3.87972600  | 0.46897800  |
| H | 6.33303600  | 3.62009300  | 2.16766500  |
| C | 5.88811200  | -0.06723700 | -1.20777100 |
| C | 4.70241600  | 0.56135700  | -0.84278500 |
| C | 4.17089100  | 0.39686800  | 0.44641800  |
| C | 4.87666500  | -0.40269900 | 1.35787600  |
| C | 6.06130600  | -1.04178900 | 0.99111200  |
| C | 6.56947900  | -0.87945200 | -0.29725700 |
| H | 6.27690800  | 0.06411000  | -2.21334300 |
| H | 4.16276100  | 1.17179500  | -1.56157200 |
| H | 4.51229700  | -0.48876300 | 2.37843900  |
| H | 6.59179100  | -1.65424800 | 1.71574300  |
| H | 7.48864400  | -1.37799800 | -0.59138400 |

|   |            |            |            |
|---|------------|------------|------------|
| C | 2.94135700 | 1.12702900 | 0.87180600 |
| H | 2.58257300 | 0.77547100 | 1.84588300 |

**M7<sub>dia</sub>**

|    |             |             |             |
|----|-------------|-------------|-------------|
| C  | -2.87749300 | 0.61538400  | 1.87111200  |
| C  | -1.39096700 | 0.74777800  | 1.34577700  |
| H  | -2.84235800 | 0.04831200  | 2.80310500  |
| N  | -3.74983300 | -0.13314700 | 0.98759800  |
| N  | -1.00849900 | -0.26037600 | 0.35171500  |
| H  | -0.83775900 | -1.18236400 | 0.74345600  |
| C  | -1.24727400 | -1.43071200 | -1.78840700 |
| C  | -0.06280800 | -2.20627800 | -1.71885100 |
| C  | 0.07938100  | -3.28759700 | -2.60084500 |
| C  | -0.90036900 | -3.58620900 | -3.54646300 |
| C  | -2.04827700 | -2.79859100 | -3.63012800 |
| C  | -2.21963300 | -1.73527800 | -2.74886700 |
| P  | 1.37958200  | -1.76942500 | -0.64262900 |
| H  | 0.98480800  | -3.88365000 | -2.56570800 |
| H  | -0.75759300 | -4.42383300 | -4.22299200 |
| H  | -2.80633100 | -3.00908100 | -4.37787800 |
| H  | -3.10751600 | -1.11441400 | -2.78534100 |
| Pd | 1.25416500  | 0.49460800  | -0.40808200 |
| C  | 1.17042300  | -2.78059400 | 0.86564700  |
| C  | 0.03074100  | -3.56523200 | 1.08417300  |
| C  | -0.14794400 | -4.23358300 | 2.30311600  |
| C  | 0.84997400  | -4.12504200 | 3.27559100  |
| C  | 2.00214300  | -3.35517600 | 3.07540500  |
| C  | 2.14514100  | -2.66748800 | 1.86837300  |
| H  | -0.72585000 | -3.65598600 | 0.31094900  |
| H  | 0.72428000  | -4.65138700 | 4.21941400  |
| H  | 3.01308400  | -2.03824800 | 1.71301900  |
| C  | 2.81829700  | -2.44518600 | -1.53093500 |
| C  | 3.18800500  | -1.79104300 | -2.71887600 |
| C  | 4.35070600  | -2.15283300 | -3.39634000 |
| C  | 5.14441200  | -3.18042100 | -2.85950100 |
| C  | 4.79211900  | -3.84868800 | -1.68641800 |
| C  | 3.61184500  | -3.47445900 | -1.02680600 |
| H  | 2.56822400  | -0.98365500 | -3.10226300 |
| H  | 6.06330000  | -3.45951800 | -3.37142500 |
| H  | 3.33384600  | -3.97438500 | -0.10456100 |
| C  | -3.72882900 | -1.47402500 | 0.94008100  |
| O  | -3.03222300 | -2.17169200 | 1.69068000  |
| H  | -4.28380600 | 0.32893400  | 0.25948600  |
| H  | -1.27766300 | 1.70329100  | 0.83676000  |

|   |             |             |             |
|---|-------------|-------------|-------------|
| C | -1.58263600 | -0.25472300 | -0.91584200 |
| O | -2.32440600 | 0.64159000  | -1.29009300 |
| C | -0.45374700 | 0.69034400  | 2.53377700  |
| C | 0.18644200  | 1.84974900  | 2.97614300  |
| C | -0.27808000 | -0.50198500 | 3.24961500  |
| C | 1.01137400  | 1.82168400  | 4.10127300  |
| H | 0.04902700  | 2.77613300  | 2.43504100  |
| C | 0.54333400  | -0.53042100 | 4.37491400  |
| H | -0.80007000 | -1.40531000 | 2.94599900  |
| C | 1.19278000  | 0.62976900  | 4.80363000  |
| H | 1.51051800  | 2.73315600  | 4.41770500  |
| H | 0.66755500  | -1.46120400 | 4.91897800  |
| H | 1.82777300  | 0.60472600  | 5.68528800  |
| C | -3.41493100 | 2.00418700  | 2.13703600  |
| C | -3.76996400 | 2.39244500  | 3.43051600  |
| C | -3.49873800 | 2.93581000  | 1.09217700  |
| C | -4.20690300 | 3.69455900  | 3.68256100  |
| H | -3.69331500 | 1.67595100  | 4.24417500  |
| C | -3.93427100 | 4.23532400  | 1.34337300  |
| H | -3.20298000 | 2.65052400  | 0.08692900  |
| C | -4.28868600 | 4.61772500  | 2.63975200  |
| H | -4.47634800 | 3.98711600  | 4.69356100  |
| H | -3.97679200 | 4.94757000  | 0.52589000  |
| H | -4.62098200 | 5.63329000  | 2.83654400  |
| C | -4.70514300 | -1.97519800 | -0.17182100 |
| O | -5.33201500 | -1.09662300 | -0.77696900 |
| N | -4.86980900 | -3.29657600 | -0.41832500 |
| C | -4.03132500 | -4.37582900 | 0.15322200  |
| C | -5.96191500 | -3.70869000 | -1.34117000 |
| H | -5.94452400 | -4.80049300 | -1.31366800 |
| C | -5.70012100 | -3.28113400 | -2.78928200 |
| C | 3.04997700  | -3.23246700 | 4.15298600  |
| H | 4.05158800  | -3.43032700 | 3.75780500  |
| H | 3.06709600  | -2.21391300 | 4.55676600  |
| H | 2.85840900  | -3.92675500 | 4.97718400  |
| C | -1.39909300 | -5.03241500 | 2.56787600  |
| H | -1.29163600 | -5.65519600 | 3.46127000  |
| H | -2.25346600 | -4.36297200 | 2.71521900  |
| H | -1.63823800 | -5.68986200 | 1.72446700  |
| C | 5.66860300  | -4.93256000 | -1.10678900 |
| H | 6.10035400  | -4.61594900 | -0.14886300 |
| H | 5.09775200  | -5.84862400 | -0.91486400 |
| H | 6.49428900  | -5.18245400 | -1.77961800 |
| C | 4.76602200  | -1.43985800 | -4.65986400 |



|   |             |             |             |
|---|-------------|-------------|-------------|
| H | 5.72805000  | -0.93066500 | -4.52572000 |
| H | 4.88376300  | -2.14209300 | -5.49386500 |
| H | 4.02740500  | -0.68763200 | -4.95103500 |
| H | -3.25658900 | -3.87431100 | 0.72107300  |
| H | -4.73002900 | -3.65305600 | -3.13030400 |
| H | -6.47622000 | -3.69927200 | -3.44036700 |
| H | -5.71352300 | -2.19399400 | -2.87951400 |
| C | -7.33836900 | -3.26747400 | -0.83114700 |
| H | -7.43779500 | -2.18168200 | -0.85956900 |
| H | -8.11803900 | -3.70865400 | -1.46207000 |
| H | -7.49576400 | -3.61025700 | 0.19701300  |
| C | -3.34824800 | -5.19758700 | -0.94596800 |
| H | -2.76244100 | -4.55178800 | -1.60522200 |
| H | -2.66822600 | -5.92088000 | -0.48236500 |
| H | -4.05757700 | -5.76456100 | -1.55873900 |
| C | -4.83813000 | -5.23834200 | 1.12835300  |
| H | -5.24912700 | -4.61785600 | 1.93070600  |
| H | -5.66552800 | -5.76078100 | 0.63491600  |
| H | -4.19017500 | -5.99710800 | 1.57950200  |
| C | 0.81170600  | 4.41885800  | 0.89750600  |
| C | 1.48511300  | 3.45666100  | 0.13554100  |
| C | 2.89296300  | 3.36314100  | 0.19668600  |
| C | 3.57839800  | 4.21003500  | 1.07139000  |
| C | 2.90032200  | 5.14644900  | 1.85656500  |
| C | 1.51438700  | 5.26312400  | 1.75845400  |
| H | -0.26979600 | 4.47812200  | 0.81768900  |
| H | 4.66064000  | 4.15618200  | 1.12584900  |
| H | 3.45906300  | 5.79257400  | 2.52818400  |
| H | 0.97922300  | 5.99917900  | 2.35247100  |
| C | 3.59120000  | 2.40633200  | -0.75722000 |
| H | 3.23219900  | 2.66789300  | -1.75506100 |
| N | 0.74055400  | 2.51703800  | -0.63135400 |
| S | 0.45483300  | 2.91384400  | -2.21859000 |
| C | -0.96014300 | 4.01526000  | -2.16710200 |
| C | -2.24256900 | 3.50702500  | -2.36840100 |
| C | -0.75821600 | 5.37233800  | -1.90839300 |
| C | -3.33330300 | 4.37179800  | -2.29232200 |
| H | -2.37289400 | 2.45098900  | -2.56661900 |
| C | -1.86119700 | 6.21932400  | -1.82356100 |
| H | 0.24879800  | 5.75281700  | -1.78248000 |
| C | -3.16252500 | 5.73515000  | -2.01495900 |
| H | -4.33568700 | 3.97979100  | -2.44805700 |
| H | -1.70914400 | 7.27538900  | -1.61421300 |
| O | 1.55318600  | 3.71343900  | -2.80172000 |

|   |             |             |             |
|---|-------------|-------------|-------------|
| O | 0.03549100  | 1.67502500  | -2.90034800 |
| C | -4.35042700 | 6.66510700  | -1.95813700 |
| H | -4.59170900 | 7.05904400  | -2.95421700 |
| H | -4.15637600 | 7.52388000  | -1.30695300 |
| H | -5.24400600 | 6.15076400  | -1.58822800 |
| C | 5.09440400  | 2.55709700  | -0.76668100 |
| H | 5.61867700  | 2.31814800  | 0.15742900  |
| C | 5.79298700  | 2.91299500  | -1.84516700 |
| H | 5.30062400  | 3.15285100  | -2.78530200 |
| H | 6.87733200  | 2.98830000  | -1.82505800 |
| C | 4.29686900  | 0.09062500  | 3.01168700  |
| C | 3.62210600  | 0.64755400  | 1.92845200  |
| C | 3.93447100  | 0.26414200  | 0.61152600  |
| C | 4.93520300  | -0.70390800 | 0.42029800  |
| C | 5.60871400  | -1.26513600 | 1.50630300  |
| C | 5.29709600  | -0.86530600 | 2.80715100  |
| H | 4.03156500  | 0.39914000  | 4.01832000  |
| H | 2.83603000  | 1.37308900  | 2.09866800  |
| H | 5.19204100  | -1.00627700 | -0.58977200 |
| H | 6.38228200  | -2.00909300 | 1.33297800  |
| H | 5.82372700  | -1.29614600 | 3.65415500  |
| C | 3.26858300  | 0.89454800  | -0.57085500 |
| H | 3.59092400  | 0.38880300  | -1.48272700 |

### TS5

|    |             |             |             |
|----|-------------|-------------|-------------|
| C  | -2.76683900 | 2.19408800  | 1.44997900  |
| C  | -1.47969300 | 1.27327700  | 1.26664100  |
| H  | -3.15884200 | 2.01459600  | 2.45251400  |
| N  | -3.82308000 | 1.82354100  | 0.52810100  |
| N  | -1.74655200 | 0.13229900  | 0.40763500  |
| H  | -1.84439800 | -0.77638800 | 0.84042300  |
| C  | -1.90661900 | -1.01567700 | -1.72561900 |
| C  | -1.07953700 | -2.14385400 | -1.54175100 |
| C  | -1.29752500 | -3.26684200 | -2.35423400 |
| C  | -2.29069100 | -3.26601500 | -3.33284700 |
| C  | -3.07980900 | -2.13143900 | -3.52873300 |
| C  | -2.88637200 | -1.01045100 | -2.72484500 |
| P  | 0.36885300  | -2.08771700 | -0.38332300 |
| H  | -0.66443000 | -4.13937900 | -2.23611900 |
| H  | -2.43504800 | -4.14631700 | -3.95289600 |
| H  | -3.83827100 | -2.11723200 | -4.30543000 |
| H  | -3.48824000 | -0.11728900 | -2.85645200 |
| Pd | 1.46419300  | -0.14992400 | -0.28396700 |
| C  | -0.32316500 | -2.77509100 | 1.17511900  |

|   |             |             |             |
|---|-------------|-------------|-------------|
| C | -1.65887900 | -3.16883100 | 1.31417200  |
| C | -2.15961000 | -3.58053700 | 2.55850900  |
| C | -1.28388100 | -3.64491200 | 3.64292200  |
| C | 0.06252600  | -3.27326900 | 3.52734500  |
| C | 0.52117500  | -2.81484500 | 2.29361300  |
| H | -2.32210800 | -3.15106500 | 0.45306900  |
| H | -1.66150400 | -3.96889400 | 4.61039200  |
| H | 1.54491800  | -2.46263800 | 2.20159400  |
| C | 1.44038200  | -3.41866600 | -1.04551300 |
| C | 2.32483000  | -3.04848500 | -2.06536600 |
| C | 3.18248800  | -3.99047900 | -2.64242700 |
| C | 3.15181000  | -5.30283000 | -2.16072600 |
| C | 2.28770400  | -5.69382500 | -1.12820200 |
| C | 1.42882900  | -4.73784600 | -0.57604700 |
| H | 2.37470200  | -2.00684000 | -2.37745000 |
| H | 3.83046000  | -6.03882700 | -2.58814500 |
| H | 0.75124700  | -5.02039200 | 0.22486900  |
| C | -4.54830200 | 0.70507100  | 0.71140800  |
| O | -4.55208600 | 0.04287600  | 1.75439300  |
| H | -3.87481100 | 2.24366300  | -0.39289500 |
| H | -0.71934700 | 1.86650100  | 0.75715800  |
| C | -1.75743000 | 0.25297900  | -0.94060600 |
| O | -1.70478200 | 1.34740400  | -1.51177200 |
| C | -0.93496800 | 0.80432700  | 2.59855300  |
| C | 0.36283700  | 1.15320500  | 2.98301800  |
| C | -1.71940300 | 0.02441100  | 3.45811200  |
| C | 0.87276200  | 0.73525400  | 4.21255600  |
| H | 0.96732100  | 1.76257600  | 2.32653300  |
| C | -1.20534900 | -0.39821200 | 4.68381400  |
| H | -2.73318100 | -0.23801900 | 3.16747000  |
| C | 0.08876200  | -0.04068900 | 5.06747200  |
| H | 1.87606700  | 1.03554000  | 4.50305500  |
| H | -1.82018700 | -1.00544400 | 5.34181800  |
| H | 0.48065900  | -0.36181700 | 6.02873500  |
| C | -2.40906200 | 3.65700700  | 1.30193000  |
| C | -2.54399500 | 4.53019200  | 2.38386000  |
| C | -1.92105600 | 4.14977200  | 0.08210200  |
| C | -2.21159200 | 5.88036700  | 2.25253200  |
| H | -2.91128000 | 4.15105800  | 3.33393500  |
| C | -1.59215400 | 5.49772200  | -0.05028300 |
| H | -1.77850100 | 3.46592500  | -0.74928000 |
| C | -1.74014500 | 6.36842200  | 1.03311200  |
| H | -2.32278000 | 6.54854600  | 3.10195700  |
| H | -1.19956000 | 5.86174500  | -0.99492800 |

|   |             |             |             |
|---|-------------|-------------|-------------|
| H | -1.48180100 | 7.41867300  | 0.92894500  |
| C | -5.41778700 | 0.40634800  | -0.54070000 |
| O | -5.51781300 | 1.31060500  | -1.37915100 |
| N | -6.06858400 | -0.77886800 | -0.63931000 |
| C | -5.74137300 | -1.98171800 | 0.16508100  |
| C | -7.16294100 | -0.90336100 | -1.63707700 |
| H | -7.61103500 | -1.87837600 | -1.43178700 |
| C | -6.65337600 | -0.91748100 | -3.08247000 |
| C | 0.99489300  | -3.35539300 | 4.70977500  |
| H | 1.73506100  | -2.54995500 | 4.68114900  |
| H | 0.44809600  | -3.27840600 | 5.65481200  |
| H | 1.53903300  | -4.30896300 | 4.71925000  |
| C | -3.62488600 | -3.89939800 | 2.72385300  |
| H | -3.81463300 | -4.44479400 | 3.65350500  |
| H | -4.21823700 | -2.97676500 | 2.75075300  |
| H | -4.00065900 | -4.50509200 | 1.89186000  |
| C | 2.26808200  | -7.12332200 | -0.64111200 |
| H | 1.67891600  | -7.76341600 | -1.31106800 |
| H | 3.27801500  | -7.54606400 | -0.59810100 |
| H | 1.82505600  | -7.19792400 | 0.35712500  |
| C | 4.13945100  | -3.57004700 | -3.72992700 |
| H | 4.88701700  | -4.34509100 | -3.92767200 |
| H | 3.60792400  | -3.36913000 | -4.66841500 |
| H | 4.66151700  | -2.64992100 | -3.44835100 |
| H | -4.83085300 | -1.74217800 | 0.70544300  |
| H | -5.91186600 | -1.70811100 | -3.22437200 |
| H | -7.49035000 | -1.10559900 | -3.76472400 |
| H | -6.20103200 | 0.04239700  | -3.33704700 |
| C | -8.25474400 | 0.14848200  | -1.40970800 |
| H | -7.88214900 | 1.15265400  | -1.61764800 |
| H | -9.10085700 | -0.05601100 | -2.07511400 |
| H | -8.61401000 | 0.11238600  | -0.37582000 |
| C | -5.44313400 | -3.19049100 | -0.73041000 |
| H | -4.64453900 | -2.96245200 | -1.44091500 |
| H | -5.11371300 | -4.02439800 | -0.10162500 |
| H | -6.31929100 | -3.53462500 | -1.29036700 |
| C | -6.83388600 | -2.25956300 | 1.20008900  |
| H | -6.93049800 | -1.40158700 | 1.87032900  |
| H | -7.80390400 | -2.45433800 | 0.72791500  |
| H | -6.57314100 | -3.13939800 | 1.79842100  |
| C | 1.53513200  | 3.61199600  | 0.59208400  |
| C | 2.51687900  | 2.61758900  | 0.60670000  |
| C | 3.42909800  | 2.53869400  | 1.66717700  |
| C | 3.35261800  | 3.44578500  | 2.72030000  |

|   |             |             |             |
|---|-------------|-------------|-------------|
| C | 2.36543000  | 4.43703200  | 2.71241200  |
| C | 1.46340800  | 4.52015300  | 1.65073300  |
| H | 0.82085700  | 3.65164600  | -0.22013700 |
| H | 4.05886100  | 3.37688000  | 3.54293100  |
| H | 2.29612700  | 5.13562600  | 3.54119400  |
| H | 0.68080800  | 5.27107000  | 1.65108500  |
| C | 4.44013500  | 1.42170200  | 1.53667700  |
| H | 5.25150400  | 1.76563300  | 0.88749100  |
| N | 2.59417100  | 1.58297300  | -0.36216500 |
| S | 3.34770400  | 1.94050400  | -1.81390700 |
| C | 2.16149000  | 3.05806500  | -2.54893600 |
| C | 0.87644600  | 2.58084800  | -2.82010400 |
| C | 2.48283700  | 4.40266700  | -2.71229600 |
| C | -0.09592600 | 3.47119700  | -3.25926700 |
| H | 0.62526800  | 1.54165500  | -2.64159600 |
| C | 1.49645100  | 5.28135900  | -3.16255800 |
| H | 3.48192800  | 4.74705100  | -2.47040700 |
| C | 0.19882600  | 4.83261700  | -3.43851400 |
| H | -1.10147500 | 3.10071200  | -3.43278000 |
| H | 1.73622300  | 6.33411300  | -3.28849400 |
| O | 4.59696000  | 2.69407700  | -1.58455900 |
| O | 3.39708300  | 0.69352700  | -2.58891600 |
| C | -0.86702000 | 5.78358500  | -3.92569200 |
| H | -1.03223800 | 5.66927000  | -5.00480200 |
| H | -0.58912000 | 6.82658100  | -3.74345000 |
| H | -1.82642100 | 5.59276400  | -3.43203200 |
| C | 5.01798100  | 0.97978700  | 2.86146300  |
| H | 4.28887200  | 0.71737200  | 3.62850600  |
| C | 6.32296900  | 0.87708300  | 3.11153100  |
| H | 7.06596500  | 1.12418400  | 2.35700200  |
| H | 6.69543100  | 0.54297800  | 4.07581200  |
| C | 6.47988400  | -1.40476600 | -1.19183700 |
| C | 5.67450600  | -0.42542000 | -0.62007700 |
| C | 4.59267500  | -0.78956000 | 0.20487700  |
| C | 4.33956900  | -2.15949900 | 0.42087600  |
| C | 5.15954600  | -3.13321500 | -0.13132000 |
| C | 6.23352700  | -2.75820100 | -0.94416900 |
| H | 7.30239900  | -1.11081000 | -1.83728900 |
| H | 5.85980900  | 0.62009200  | -0.83812800 |
| H | 3.48296600  | -2.45013000 | 1.02002100  |
| H | 4.94276200  | -4.18175000 | 0.04395600  |
| H | 6.86614200  | -3.51826000 | -1.39383000 |
| C | 3.79118500  | 0.19228400  | 0.92005100  |
| H | 3.03104700  | -0.23796600 | 1.57115800  |

**M8**

|    |             |             |             |
|----|-------------|-------------|-------------|
| C  | -2.70191600 | 2.64009300  | 1.33022700  |
| C  | -1.34890000 | 1.87152200  | 1.02832500  |
| H  | -3.00851800 | 2.39529600  | 2.34882500  |
| N  | -3.77126600 | 2.19241100  | 0.46343800  |
| N  | -1.59063400 | 0.58630600  | 0.40806500  |
| H  | -1.75247600 | -0.21628700 | 1.00162900  |
| C  | -1.96212300 | -0.88505700 | -1.50301200 |
| C  | -1.26929100 | -2.06466800 | -1.13408200 |
| C  | -1.55234000 | -3.24186700 | -1.84663600 |
| C  | -2.48306100 | -3.26252500 | -2.88474600 |
| C  | -3.16625500 | -2.09676000 | -3.23304300 |
| C  | -2.90406000 | -0.91841900 | -2.53942200 |
| P  | 0.13065500  | -2.03657300 | 0.08740000  |
| H  | -1.01697300 | -4.15119100 | -1.59891600 |
| H  | -2.66966000 | -4.18907700 | -3.42060800 |
| H  | -3.89010300 | -2.10133700 | -4.04221600 |
| H  | -3.41599500 | 0.00262400  | -2.79506000 |
| Pd | 1.50689100  | -0.34359000 | -0.12307200 |
| C  | -0.69594200 | -2.30783100 | 1.71112500  |
| C  | -2.07731300 | -2.43429100 | 1.89077400  |
| C  | -2.62289600 | -2.55948800 | 3.17894800  |
| C  | -1.75409700 | -2.59912100 | 4.27189300  |
| C  | -0.36483300 | -2.49838200 | 4.11542600  |
| C  | 0.14778200  | -2.33128400 | 2.83053200  |
| H  | -2.73885200 | -2.43466700 | 1.02823800  |
| H  | -2.16873000 | -2.70303800 | 5.27241600  |
| H  | 1.21753800  | -2.19740700 | 2.68893600  |
| C  | 0.98624100  | -3.64936400 | -0.15097900 |
| C  | 2.22828400  | -3.62445800 | -0.79461600 |
| C  | 2.97512000  | -4.79800700 | -0.96388900 |
| C  | 2.45602000  | -5.99415400 | -0.46135200 |
| C  | 1.21706700  | -6.04652500 | 0.19494700  |
| C  | 0.48998500  | -4.86341700 | 0.34622100  |
| H  | 2.63613000  | -2.67225700 | -1.12534000 |
| H  | 3.03464100  | -6.91000900 | -0.57056500 |
| H  | -0.46072300 | -4.88224000 | 0.87281100  |
| C  | -4.44261800 | 1.05236800  | 0.70798000  |
| O  | -4.33894500 | 0.40457200  | 1.75496500  |
| H  | -3.91357300 | 2.59326000  | -0.45683600 |
| H  | -0.80483000 | 2.45694500  | 0.29058100  |
| C  | -1.70990000 | 0.48352600  | -0.93514700 |
| O  | -1.66333800 | 1.47247900  | -1.67952700 |

|   |             |             |             |
|---|-------------|-------------|-------------|
| C | -0.51357500 | 1.73787500  | 2.27902300  |
| C | 0.70274900  | 2.42062400  | 2.38608700  |
| C | -0.95543700 | 0.95134700  | 3.34904600  |
| C | 1.47822900  | 2.30203500  | 3.53956900  |
| H | 1.03730100  | 3.04796700  | 1.56833600  |
| C | -0.17972500 | 0.83431500  | 4.50164300  |
| H | -1.90522600 | 0.42630200  | 3.28173900  |
| C | 1.04165700  | 1.50391500  | 4.59906800  |
| H | 2.41587300  | 2.84622700  | 3.61312900  |
| H | -0.53254000 | 0.21884500  | 5.32296200  |
| H | 1.64278500  | 1.41369800  | 5.49982100  |
| C | -2.46075100 | 4.12502200  | 1.19810800  |
| C | -2.32853300 | 4.92669400  | 2.33402300  |
| C | -2.29042000 | 4.70050400  | -0.06834600 |
| C | -2.04283100 | 6.28784000  | 2.21099800  |
| H | -2.44312200 | 4.47958600  | 3.31767100  |
| C | -2.02032200 | 6.06231500  | -0.19286600 |
| H | -2.33685600 | 4.07206100  | -0.95482000 |
| C | -1.89393000 | 6.85984400  | 0.94727500  |
| H | -1.94024200 | 6.90002600  | 3.10249500  |
| H | -1.89956600 | 6.50003300  | -1.18014200 |
| H | -1.67883100 | 7.92022200  | 0.84988800  |
| C | -5.37713400 | 0.72557500  | -0.49819600 |
| O | -5.44434600 | 1.58564500  | -1.38684500 |
| N | -6.10076700 | -0.41808300 | -0.52278600 |
| C | -5.88417200 | -1.56920300 | 0.38505900  |
| C | -7.18176900 | -0.54868900 | -1.53554900 |
| H | -7.67834600 | -1.48881200 | -1.28467200 |
| C | -6.64340800 | -0.67700000 | -2.96435900 |
| C | 0.56246100  | -2.54670400 | 5.30501400  |
| H | 1.31118000  | -1.74893600 | 5.24817000  |
| H | 0.01418600  | -2.43429400 | 6.24598400  |
| H | 1.10312300  | -3.50062400 | 5.34797800  |
| C | -4.11638400 | -2.62450400 | 3.37776200  |
| H | -4.36996200 | -2.92493900 | 4.39917900  |
| H | -4.56930900 | -1.64601200 | 3.18445400  |
| H | -4.57851200 | -3.34280700 | 2.69064300  |
| C | 0.68714100  | -7.35682000 | 0.72731400  |
| H | 0.44883200  | -8.05195800 | -0.08789300 |
| H | 1.42371800  | -7.85488300 | 1.36889800  |
| H | -0.22420500 | -7.20733900 | 1.31469100  |
| C | 4.30665400  | -4.74875500 | -1.67336300 |
| H | 4.94478700  | -5.59154700 | -1.38661700 |
| H | 4.17229800  | -4.79278400 | -2.76201000 |

|   |             |             |             |
|---|-------------|-------------|-------------|
| H | 4.83589200  | -3.81737500 | -1.45018500 |
| H | -4.99761400 | -1.32737400 | 0.95962900  |
| H | -5.93858500 | -1.50932900 | -3.03629000 |
| H | -7.47448000 | -0.86937700 | -3.65255400 |
| H | -6.13964800 | 0.24164800  | -3.26886300 |
| C | -8.22732500 | 0.56338400  | -1.39441500 |
| H | -7.80368700 | 1.53545900  | -1.65073400 |
| H | -9.06867800 | 0.35892900  | -2.06589200 |
| H | -8.60893300 | 0.60375000  | -0.36869500 |
| C | -5.59671600 | -2.85677300 | -0.39573400 |
| H | -4.74815800 | -2.72212300 | -1.07163100 |
| H | -5.34470500 | -3.65261100 | 0.31401700  |
| H | -6.45562700 | -3.20344300 | -0.98071100 |
| C | -7.05004900 | -1.71218100 | 1.36723800  |
| H | -7.14729500 | -0.80126200 | 1.96533300  |
| H | -8.00072800 | -1.89746200 | 0.85406600  |
| H | -6.87053900 | -2.55212200 | 2.04601000  |
| C | 1.44634600  | 2.89489700  | -1.10348800 |
| C | 2.66410200  | 2.44531400  | -0.60301600 |
| C | 3.56221600  | 3.29808700  | 0.04370700  |
| C | 3.24625800  | 4.64172400  | 0.21073300  |
| C | 2.03140300  | 5.11651200  | -0.29832900 |
| C | 1.14752500  | 4.25251000  | -0.95282600 |
| H | 0.73260400  | 2.21468000  | -1.55225300 |
| H | 3.92868100  | 5.30061000  | 0.73988400  |
| H | 1.75890400  | 6.15919900  | -0.16369800 |
| H | 0.19685600  | 4.62631200  | -1.31380600 |
| C | 4.76984000  | 2.51452400  | 0.52597400  |
| H | 5.56403000  | 2.58675900  | -0.22512100 |
| N | 3.12743600  | 1.06884200  | -0.58458600 |
| S | 3.86007800  | 0.59902800  | -2.18848800 |
| C | 2.43887300  | 0.73869800  | -3.23522900 |
| C | 1.52945400  | -0.32473900 | -3.25884200 |
| C | 2.18831600  | 1.93036700  | -3.91256700 |
| C | 0.32800000  | -0.16151900 | -3.93865600 |
| H | 1.76157700  | -1.25140700 | -2.75133000 |
| C | 0.97491300  | 2.07386500  | -4.58255500 |
| H | 2.91798500  | 2.73153100  | -3.88586100 |
| C | 0.01691000  | 1.05049200  | -4.57052600 |
| H | -0.39465800 | -0.97073100 | -3.94407300 |
| H | 0.75468800  | 3.00639500  | -5.09465800 |
| O | 4.85225900  | 1.62635500  | -2.53972000 |
| O | 4.24004400  | -0.81071100 | -2.09380700 |
| C | -1.35103100 | 1.26390400  | -5.15944100 |



|   |             |             |             |
|---|-------------|-------------|-------------|
| H | -1.74785700 | 0.34408000  | -5.60131800 |
| H | -1.35054800 | 2.04766400  | -5.92343800 |
| H | -2.03253000 | 1.56562800  | -4.35462000 |
| C | 5.29268100  | 2.93891100  | 1.86475400  |
| H | 4.59409900  | 2.83945000  | 2.69630700  |
| C | 6.51610000  | 3.42129500  | 2.08059300  |
| H | 7.23469700  | 3.53063700  | 1.27136200  |
| H | 6.84705000  | 3.71959600  | 3.07120100  |
| C | 7.18769300  | -1.21887000 | 0.20869700  |
| C | 6.40601000  | -0.06297100 | 0.18634600  |
| C | 5.07392600  | -0.10775400 | 0.60150400  |
| C | 4.54004300  | -1.31968500 | 1.05983100  |
| C | 5.31374700  | -2.47611900 | 1.07142800  |
| C | 6.64308400  | -2.42742100 | 0.64288800  |
| H | 8.22137400  | -1.17460700 | -0.12230500 |
| H | 6.83379800  | 0.86505100  | -0.17585000 |
| H | 3.49344400  | -1.35337000 | 1.35716200  |
| H | 4.87612500  | -3.41375700 | 1.40213100  |
| H | 7.25160600  | -3.32766000 | 0.65022200  |
| C | 4.16409000  | 1.08928300  | 0.55481100  |
| H | 3.50758800  | 1.04910800  | 1.43145000  |

### 13. References

- [1] S.-P. Jiang, X.-Y. Dong, Q.-S. Gu, L. Ye, Z.-L. Li, X.-Y. Liu, Copper-Catalyzed Enantioconvergent Radical Suzuki–Miyaura C(sp<sup>3</sup>)–C(sp<sup>2</sup>) Cross-Coupling. *J. Am. Chem. Soc.* **2020**, *142*, 19652–19659.
- [2] B. M. Trost, D. J. Michaelis, J. Charpentier, J. Xu, Palladium-Catalyzed Allylic Alkylation of Carboxylic Acid Derivatives: N-Acyloxazolones as Ester Enolate Equivalents. *Angew. Chem. Int. Ed.* **2012**, *51*, 204–208.
- [3] J.-B. Chen, C. Peng, S.-S. Zhou, Y. Wang, Z. Wang, X.-W. Wang, Chiral oxamide–phosphine–palladium catalyzed highly asymmetric allylic amination: carbonyl assistance for high regio- and enantiocontrols. *Org. Chem. Front.* **2022**, *9*, 3976–3989.
- [4] S. V. Kochetkov, A. S. Kucherenko, S. G. Zlotin, Asymmetric Synthesis of Warfarin and its Analogs Catalyzed by C<sub>2</sub>-Symmetric Squaramide-Based Primary Diamines. *Org. Biomol. Chem.* **2018**, *16*, 6423–6429.
- [5] P. Castan, S. Wimmer, E. Colacio-Rodriguez, A. L. Beauchamp, S. Cros, Platinum and Palladium Complexes of 3-methyl Orotic Acid: A Route Toward Palladium Complexes with Good Antitumor Activity. *J. Inorg. Biochem.* **1990**, *38*, 225–239.
- [6] B. Song, P. Xie, Y. Li, J. Hao, L. Wang, X. Chen, Z. Xu, H. Quan, L. Lou, Y. Xia, K. N. Houk, W. Yang, Pd-Catalyzed Decarboxylative Olefination: Stereoselective Synthesis of Polysubstituted Butadienes and Macrocyclic Pglycoprotein Inhibitors. *J. Am. Chem. Soc.* **2020**, *142*, 9982–9992.

- [7] C. Guo, M. Fleige, D. Janssen-Müller, C. G. Daniliuc, F. Glorius, Cooperative N-Heterocyclic Carbene/Palladium-Catalyzed Enantioselective Umpolung Annulations. *J. Am Chem. Soc.* **2016**, *138*, 7840–7843.
- [8] M. Sun, X. Wan, S.-J. Zhou, G.-J. Mei, F. Shi, Iridium and a Brønsted Acid Cooperatively Catalyzed Chemodivergent and Stereoselective Reactions of Vinyl Benzoxazinones with Azlactones. *Chem. Commun.* **2019**, *55*, 1283–1286.
- [9] L. Crespin, L. Biancalana, T. Morack, D. C. Blakemore, S. V. Ley, One-Pot Acid-Catalyzed Ring-Opening/Cyclization/Oxidation of Aziridines with *N*-Tosylhydrazones: Access to 1,2,4-Triazines. *Org. Lett.* **2017**, *19*, 5, 1084–1087.
- [10] Z.-S. Chen, X.-H. Duan, L.-Y. Wu, S. Ali, K.-G. Ji, P.-X. Zhou, X.-Y. Liu, and Y.-M. Liang, Palladium-Catalyzed Coupling of Propargylic Carbonates with *N*-Tosylhydrazones: Highly Selective Synthesis of Substituted Propargylic *N*-Sulfonylhydrazones and Vinylallenes. *Chem. Eur. J.* **2011**, *17*, 6918 – 6921.
- [11] Z. D. Tucker, H. M. Hill, A. L. Smith, and B. L. Ashfeld, Diverting  $\beta$ -Hydride Elimination of a  $\pi$ -Allyl PdII Carbene Complex for the Assembly of Disubstituted Indolines via a Highly Diastereoselective (4 + 1)-Cycloaddition. *Org. Lett.* **2020**, *22*, 6605–6609.
- [12] M. J. Frisch, G. W. Trucks, H. B. Schlegel, G. E. Scuseria, M. A. Robb, J. R. Cheeseman, G. Scalmani, V. Barone, G. A. Petersson, H. Nakatsuji, X. Li, M. Caricato, A. V. Marenich, J. Bloino, B. G. Janesko,; R. Gomperts, B. Mennucci, H. P. Hratchian, J. V. Ortiz, A. F. Izmaylov, J. L. Sonnenberg,; D. Williams-Young, F. Ding, F. Lipparini, F. Egidi, Goings, J. B. Peng, A. Petrone, T. Henderson, D. Ranasinghe, V. G. Zakrzewski, J Gao, N. Rega, G. Zheng, W. Liang, M. Hada, M. Ehara, K. Toyota, R. Fukuda, J. Hasegawa, M. Ishida, T. Nakajima, Y. Honda, O. Kitao, H. Nakai, T. Vreven, K. Throssell, J. A., Jr. Montgomery, J. E. Peralta, F. Ogliaro, M. J. Bearpark, J. J. Heyd, E. N. Brothers, K. N. Kudin, V. N. Staroverov, T. A. Keith, R. Kobayashi, J. Normand, K. Raghavachari, A. P. Rendell, J. C. Burant, S. S. Iyengar, J. Tomasi, M. Cossi, J. M. Millam, M. Klene, C. Adamo, R. Cammi, J. W. Ochterski, R. L. Martin, K. Morokuma, O. Farkas, J. B. Foresman, D. J. Fox, *Gaussian 16, Revision C.01*, Gaussian, Inc., Wallingford CT, 2019.
- [13] A. D. Becke, Density-Functional Thermochemistry. III. The Role of Exact Exchange. *J. Chem. Phys.* **1993**, *98*, 5648–5652.
- [14] C. T. Lee, W. T. Yang, and R. G. Parr, Development of the Colle-Salvetti Correlation-Energy Formula into a Functional of the Electron-Density. *Phys. Rev. B* **1988**, *37*, 785–789.
- [15] S. Grimme, J. Antony, S. Ehrlich, and Krieg, H. A consistent and accurate ab initio parametrization of density functional dispersion correction (DFT-D) for the 94 elements H-Pu. *J. Chem. Phys.* **2010**, *132*, 154104.
- [16] S. Grimme, S. Ehrlich, and L. Goerigk, Effect of the Damping Function in Dispersion Corrected Density Functional Theory. *J. Comput. Chem.* **2011**, *32*, 1456–1465.
